# Supplementary material for: A genome-wide CRISPR functional survey of the human phagocytosis molecular machinery
Source: Life Sci Alliance. 2023 Feb 1;6(4):e202201715. doi: 10.26508/lsa.202201715 (PMC9892931; doi:10.26508/lsa.202201715)
Supplement: Supplementary file 2 [file LSA-2022-01715_TableS2.xlsx]

## Sheet: Description
Legend Screen Table
Depleted Day 21 vs Plasmid	Genes depleted in the cell pool at day 21 post infection versus the Plasmid sgRNA pool
Description of table headers
GeneName	gene name
aLFC	average log2-fold change (aLFC) calculated for all sgRNAs
medLFC	median log2-fold change (aLFC) calculated for all sgRNAs
pval	enrichment p-value
padj	Benjamini-Hochberg adjusted p-value
ES	enrichment score
NES	normalized enrichment score (normalized to mean enrichment of random samples of the same size)
nMoreExtreme	the number of occurrences of a random gene set having a more extreme enrichment score
size	size of pathway after removing sgRNAs not present in enrichment

## Sheet: Depleted Day21 vs Plasmid
	GeneName	aLFC	medLFC	pval	padj	ES	NES	nMoreExtreme	size
3	SMU1	-4.61286	-4.76051	3.15796e-07	0.0002479	-0.997246	-1.67544	0	4
1	RRM1	-3.82742	-3.7033	3.15796e-07	0.0002479	-0.996337	-1.67391	0	4
2	PCNA	-4.17042	-4.20314	3.15796e-07	0.0002479	-0.995613	-1.67269	0	4
0	CDK6	-3.80267	-3.62626	3.15796e-07	0.0002479	-0.994464	-1.67076	0	4
4	WDR33	-3.78319	-3.53779	9.47388e-07	0.00059496	-0.993371	-1.66892	2	4
6	LRR1	-3.59705	-3.47273	2.84216e-06	0.00108174	-0.990929	-1.66482	8	4
8	HSPA5	-3.75068	-3.74033	3.15796e-06	0.00108174	-0.990091	-1.66342	9	4
5	CDK1	-3.09633	-2.95113	3.15796e-06	0.00108174	-0.989964	-1.6632	9	4
7	NFYC	-3.56611	-3.52781	3.47376e-06	0.00108174	-0.989637	-1.66265	10	4
9	DNAJC9	-3.65799	-3.741	3.47376e-06	0.00108174	-0.989609	-1.6626	10	4
10	NAMPT	-3.68968	-3.81513	3.78955e-06	0.00108174	-0.989325	-1.66213	11	4
11	ADIPOR2	-3.31438	-3.35589	4.42114e-06	0.00115687	-0.988885	-1.66139	13	4
13	PSMC6	-3.07317	-3.13168	6.31592e-06	0.0014874	-0.987706	-1.65941	19	4
12	POLR2L	-3.06545	-2.98335	6.63171e-06	0.0014874	-0.987437	-1.65896	20	4
14	RAN	-3.94826	-4.157	8.09602e-06	0.00169477	-0.995486	-1.57301	23	3
16	POLR2E	-3.1662	-3.00082	1.20002e-05	0.00227734	-0.985009	-1.65488	37	4
15	PSMA4	-3.28038	-2.78485	1.29476e-05	0.00227734	-0.984896	-1.65469	40	4
17	PSMA5	-3.30142	-3.42079	1.32634e-05	0.00227734	-0.984796	-1.65452	41	4
19	ESPL1	-4.4656	-4.8543	1.38307e-05	0.00227734	-0.994691	-1.57175	40	3
18	XPO1	-3.42914	-3.43671	1.45054e-05	0.00227734	-0.994492	-1.57144	42	3
20	ASNA1	-3.43216	-3.1654	1.7053e-05	0.00254983	-0.983973	-1.65314	53	4
21	TRAPPC1	-3.0264	-3.10917	1.92636e-05	0.00274943	-0.983334	-1.65206	60	4
22	SSU72	-3.49601	-3.12682	2.46321e-05	0.00336281	-0.982042	-1.64989	77	4
26	SARS	-2.82495	-2.8203	3.06322e-05	0.00377447	-0.981233	-1.64853	96	4
27	COPB2	-2.91288	-3.00833	3.37902e-05	0.00377447	-0.980992	-1.64813	106	4
29	CCND3	-3.34327	-3.58087	3.53691e-05	0.00377447	-0.980878	-1.64794	111	4
25	ZFP69B	-2.59561	-2.46217	3.60007e-05	0.00377447	-0.980793	-1.64779	113	4
30	PRPF8	-4.08746	-4.33001	3.64321e-05	0.00377447	-0.992746	-1.56868	107	3
28	PLK1	-2.9682	-3.02121	3.69481e-05	0.00377447	-0.980623	-1.64751	116	4
24	RLF	-2.56382	-2.44192	3.69481e-05	0.00377447	-0.980608	-1.64748	116	4
23	ANAPC11	-2.43476	-2.33192	3.72639e-05	0.00377447	-0.980481	-1.64727	117	4
31	NEDD1	-2.6282	-2.7039	4.35798e-05	0.00420599	-0.979615	-1.64581	137	4
33	BUB3	-3.32481	-3.42475	4.57904e-05	0.00420599	-0.979388	-1.64543	144	4
32	EXO5	-2.6355	-2.71158	4.61062e-05	0.00420599	-0.979373	-1.64541	145	4
34	TRAPPC8	-4.27556	-4.27556	4.68821e-05	0.00420599	-0.998495	-1.45815	127	2
36	UBL5	-2.9738	-3.09113	4.89484e-05	0.0042344	-0.979089	-1.64493	154	4
35	ZNF684	-2.43741	-2.45267	4.98958e-05	0.0042344	-0.978777	-1.64441	157	4
37	TIMELESS	-3.60128	-3.66199	5.46481e-05	0.00451566	-0.991412	-1.56657	161	3
38	HMGCS1	-3.03621	-3.07648	5.84222e-05	0.00470374	-0.978224	-1.64348	184	4
39	ANAPC4	-2.47965	-2.52278	6.09486e-05	0.00478447	-0.977925	-1.64298	192	4
40	PSMA2	-3.11831	-3.19963	6.60013e-05	0.00499351	-0.977244	-1.64183	208	4
41	DUT	-3.45986	-3.38105	6.67922e-05	0.00499351	-0.990688	-1.56543	197	3
42	FBXW11	-3.44625	-3.35453	7.48882e-05	0.00546858	-0.990319	-1.56485	221	3
43	TRAPPC11	-3.37498	-2.38236	7.76858e-05	0.00554394	-0.976406	-1.64042	245	4
44	SLC35B1	-2.65806	-2.70248	8.33701e-05	0.00581738	-0.976108	-1.63992	263	4
45	YRDC	-3.42013	-3.43659	8.53455e-05	0.00582576	-0.989694	-1.56386	252	3
46	DBR1	-3.17686	-2.85496	9.25282e-05	0.00618167	-0.975342	-1.63864	292	4
47	SS18L2	-4.17877	-4.60413	9.54656e-05	0.00624504	-0.989296	-1.56323	282	3
49	CCT2	-4.49992	-5.19447	0.000100526	0.00637656	-0.989041	-1.56283	297	3
48	ERH	-3.53463	-3.49206	0.000101538	0.00637656	-0.988998	-1.56276	300	3
50	HNRNPK	-2.26575	-2.19647	0.000104844	0.00642633	-0.974561	-1.63732	331	4
51	SF3B3	-3.03303	-3.11957	0.000106423	0.00642633	-0.974362	-1.63699	336	4
52	PSMD1	-3.05135	-3.12588	0.000109296	0.00647529	-0.9887	-1.56229	323	3
53	POLR2F	-3.59228	-3.23671	0.000121103	0.00704191	-0.98826	-1.56159	358	3
54	CDC123	-2.93756	-2.95695	0.000125826	0.0071835	-0.988104	-1.56135	372	3
55	EIF2S1	-3.29702	-3.30353	0.000128187	0.00718763	-0.98799	-1.56117	379	3
56	PRIM1	-2.53868	-2.60537	0.000136424	0.00751528	-0.972517	-1.63389	431	4
57	COPS3	-2.45833	-2.4457	0.000141161	0.00764215	-0.972361	-1.63363	446	4
59	WRB	-3.00617	-3.04154	0.000149056	0.00780058	-0.971977	-1.63298	471	4
58	ZMPSTE24	-2.5086	-2.61824	0.000149056	0.00780058	-0.971963	-1.63296	471	4
60	RPL27A	-3.0669	-2.89255	0.000155174	0.00791005	-0.987252	-1.56	459	3
61	CDC27	-3.6249	-2.9178	0.000156186	0.00791005	-0.987238	-1.55998	462	3
62	EIF3A	-2.34766	-2.10883	0.000159793	0.00796427	-0.971438	-1.63208	505	4
63	NUDT21	-3.11865	-3.15303	0.000174739	0.00857314	-0.986599	-1.55897	517	3
66	PRPF38B	-2.83683	-2.65751	0.000186208	0.00892439	-0.986244	-1.55841	551	3
65	BUB1B	-2.70183	-2.59186	0.000190425	0.00892439	-0.970146	-1.62991	602	4
64	RPS2	-2.34279	-2.4463	0.000190425	0.00892439	-0.970118	-1.62986	602	4
71	ZFP69	-2.90538	-3.15595	0.000196109	0.00895931	-0.969905	-1.6295	620	4
70	AURKB	-3.20501	-3.11818	0.000198636	0.00895931	-0.969791	-1.62931	628	4
68	KANSL2	-2.31127	-2.35626	0.000200215	0.00895931	-0.969706	-1.62917	633	4
67	TOP2A	-2.26158	-2.07892	0.000204952	0.00895931	-0.969536	-1.62888	648	4
69	RRN3	-3.12038	-2.88496	0.000205436	0.00895931	-0.985748	-1.55762	608	3
72	RPL12	-2.31604	-2.17318	0.000216952	0.00932122	-0.96911	-1.62817	686	4
73	PHB2	-2.75017	-2.63674	0.000220279	0.00932122	-0.985449	-1.55715	652	3
74	DDX46	-3.01576	-3.04643	0.000222641	0.00932122	-0.985407	-1.55708	659	3
75	TONSL	-2.53075	-2.0941	0.00022611	0.00934191	-0.96867	-1.62743	715	4
78	PPP4C	-2.22312	-2.04594	0.000238742	0.00960612	-0.968201	-1.62664	755	4
77	CDC6	-2.22002	-1.89755	0.000240005	0.00960612	-0.968088	-1.62645	759	4
76	RPS5	-1.91184	-1.86065	0.000242531	0.00960612	-0.968002	-1.6263	767	4
79	CNOT3	-2.65041	-2.27246	0.000244742	0.00960612	-0.967932	-1.62619	774	4
82	NAA10	-2.80611	-2.81017	0.00025611	0.00985329	-0.967577	-1.62559	810	4
80	SF3A3	-2.49538	-2.50213	0.000259584	0.00985329	-0.967392	-1.62528	821	4
81	TUBB	-2.61819	-2.70755	0.000262111	0.00985329	-0.967264	-1.62506	829	4
83	CDK9	-2.86147	-2.86106	0.000267163	0.00985329	-0.967051	-1.62471	845	4
85	RPL10	-3.67285	-3.67285	0.000267741	0.00985329	-0.996082	-1.45463	730	2
84	RPA3	-3.24632	-3.36594	0.000269867	0.00985329	-0.984342	-1.5554	799	3
86	NDNL2	-2.92793	-3.06904	0.000276614	0.00998354	-0.984143	-1.55509	819	3
87	POLR2H	-2.20449	-2.12704	0.000284532	0.0101526	-0.966427	-1.62366	900	4
88	PAFAH1B1	-2.60031	-2.72711	0.000289269	0.0102057	-0.966271	-1.6234	915	4
89	RPS3	-2.88693	-2.91166	0.000295269	0.0103013	-0.9661	-1.62311	934	4
90	POLR2C	-3.07887	-3.30909	0.000298541	0.0103013	-0.983689	-1.55437	884	3
91	POLR3H	-2.70874	-2.8609	0.000303164	0.0103471	-0.965845	-1.62268	959	4
92	RANGAP1	-3.14712	-3.15136	0.000307649	0.0103873	-0.983519	-1.5541	911	3
93	KIAA1432	-2.371	-2.51623	0.000317059	0.0105911	-0.965405	-1.62194	1003	4
94	KIF15	-1.93392	-1.91611	0.000322428	0.0106571	-0.965248	-1.62168	1020	4
96	EEF2	-3.69172	-3.69172	0.000329273	0.0106725	-0.995628	-1.45396	898	2
95	RBM17	-2.07249	-2.04933	0.000329691	0.0106725	-0.965092	-1.62142	1043	4
98	NRAS	-3.02851	-3.09159	0.00036506	0.0116388	-0.964127	-1.61979	1155	4
97	ELOVL1	-2.35	-2.06492	0.000366955	0.0116388	-0.96407	-1.6197	1161	4
99	NHP2L1	-2.14955	-2.04531	0.000417798	0.0131189	-0.962849	-1.61765	1322	4
100	RNGTT	-3.4257	-3.50954	0.000433272	0.01347	-0.962509	-1.61707	1371	4
101	TAZ	-2.78597	-2.92557	0.000443377	0.0136491	-0.962182	-1.61653	1403	4
102	LSM7	-1.90341	-1.85723	0.000448746	0.0136802	-0.962069	-1.61634	1420	4
103	SUPT16H	-3.45455	-3.73161	0.000461062	0.0139205	-0.961827	-1.61593	1459	4
108	LSM2	-3.14979	-3.16496	0.000498242	0.014721	-0.980481	-1.5493	1476	3
105	NCAPG	-2.35518	-2.41448	0.000507484	0.014721	-0.960919	-1.6144	1606	4
107	SMC1A	-3.36262	-3.09846	0.000507688	0.014721	-0.980367	-1.54912	1504	3
106	DAD1	-2.79397	-2.91199	0.000512221	0.014721	-0.960777	-1.61417	1621	4
104	TACC3	-2.73784	-2.35559	0.000515109	0.014721	-0.980282	-1.54899	1526	3
109	MED30	-3.87165	-3.87165	0.000515703	0.014721	-0.994393	-1.45216	1407	2
110	GPN3	-2.51088	-2.50669	0.00052959	0.0149812	-0.960394	-1.61352	1676	4
113	PSMA6	-3.20766	-3.48903	0.000580749	0.0160483	-0.959329	-1.61173	1838	4
112	MED11	-2.74711	-2.5457	0.000582328	0.0160483	-0.959315	-1.61171	1843	4
111	BTAF1	-1.98883	-2.07486	0.000582643	0.0160483	-0.9593	-1.61168	1844	4
114	TMED10	-3.19606	-3.60802	0.000588311	0.0160634	-0.979189	-1.54726	1743	3
115	RPL10A	-2.48838	-2.53841	0.000600792	0.0162628	-0.979033	-1.54701	1780	3
116	MASTL	-3.05013	-3.03191	0.000611381	0.016408	-0.958676	-1.61064	1935	4
117	HTATSF1	-2.40355	-2.23784	0.000640597	0.0170464	-0.978522	-1.5462	1898	3
118	COPB1	-2.3882	-2.2401	0.00065038	0.0170692	-0.978451	-1.54609	1927	3
121	FEN1	-2.86634	-2.66564	0.00065544	0.0170692	-0.978366	-1.54596	1942	3
120	HNRNPU	-2.89259	-2.51722	0.000663199	0.0170692	-0.978295	-1.54585	1965	3
119	SYMPK	-2.64582	-2.40183	0.000663199	0.0170692	-0.978281	-1.54582	1965	3
122	CCNA2	-2.35793	-2.07812	0.000678645	0.0171934	-0.957455	-1.60858	2148	4
123	YARS	-2.43127	-2.29124	0.000680224	0.0171934	-0.957427	-1.60854	2153	4
124	ATP6V1A	-3.24351	-3.15473	0.000684451	0.0171934	-0.977968	-1.54533	2028	3
125	GTF2B	-2.74811	-2.59772	0.000696595	0.0173596	-0.977841	-1.54513	2064	3
127	SAP30BP	-2.85359	-2.66848	0.000715148	0.0175467	-0.977656	-1.54484	2119	3
126	MFSD2A	-1.99465	-2.00343	0.000715278	0.0175467	-0.956731	-1.60737	2264	4
128	GPX4	-3.01198	-2.19441	0.000723582	0.0176128	-0.977571	-1.5447	2144	3
129	SMC3	-2.57041	-2.61824	0.000733278	0.0177115	-0.956376	-1.60677	2321	4
130	COPS6	-2.4352	-2.50383	0.000754954	0.0180958	-0.977216	-1.54414	2237	3
131	RPP21	-2.97291	-2.41025	0.000765074	0.0181995	-0.977088	-1.54394	2267	3
132	HDAC3	-2.07432	-1.82888	0.000803385	0.0189159	-0.955297	-1.60496	2543	4
133	SNRPD2	-3.77944	-3.28044	0.000807241	0.0189159	-0.976648	-1.54324	2392	3
134	RAD9A	-2.32441	-2.15707	0.000828493	0.0191596	-0.976435	-1.54291	2455	3
135	THOC3	-3.29947	-3.44555	0.000829842	0.0191596	-0.976421	-1.54288	2459	3
136	PES1	-1.88168	-1.81013	0.000846017	0.0193398	-0.954587	-1.60377	2678	4
137	PPT1	-2.20185	-1.81486	0.000851386	0.0193398	-0.95446	-1.60355	2695	4
138	PSMA3	-2.36726	-2.56501	0.000856123	0.0193398	-0.954346	-1.60336	2710	4
139	MED24	-1.95113	-1.87759	0.000897492	0.0201295	-0.953736	-1.60234	2841	4
140	WEE1	-2.6505	-2.16754	0.000914513	0.0203657	-0.975583	-1.54156	2710	3
145	EIF3E	-2.46779	-2.44791	0.000924966	0.0203955	-0.953267	-1.60155	2928	4
144	NAA38	-2.30799	-2.42832	0.000938545	0.0203955	-0.953054	-1.60119	2971	4
146	DCTN5	-2.72152	-2.58746	0.000947234	0.0203955	-0.975229	-1.541	2807	3
141	THOC7	-1.91315	-1.87476	0.000952756	0.0203955	-0.952841	-1.60083	3016	4
143	RFC5	-2.16258	-2.10349	0.000959072	0.0203955	-0.952742	-1.60067	3036	4
148	RPSA	-2.45742	-2.6334	0.000963493	0.0203955	-0.952671	-1.60055	3050	4
142	NOP2	-2.13725	-2.08242	0.000964776	0.0203955	-0.97503	-1.54069	2859	3
147	CDC37	-2.4411	-2.62384	0.000967812	0.0203955	-0.975001	-1.54064	2868	3
151	SNRPA1	-2.6908	-2.32331	0.000997834	0.0208869	-0.974732	-1.54022	2957	3
149	TTC5	-1.70495	-1.7244	0.00100581	0.0208869	-0.952103	-1.59959	3184	4
152	CDAN1	-3.22385	-3.37871	0.00101504	0.0208869	-0.974561	-1.53995	3008	3
150	DYNC1I2	-2.83274	-2.12398	0.00101774	0.0208869	-0.974533	-1.5399	3016	3
153	PSMB2	-3.71914	-4.50983	0.00103427	0.0210883	-0.974377	-1.53965	3065	3
154	VCP	-2.05083	-2.07763	0.00104276	0.0211243	-0.951663	-1.59885	3301	4
155	TSC2	-1.91108	-1.58846	0.00106139	0.0211323	-0.951379	-1.59838	3360	4
157	FBL	-2.64836	-2.01884	0.00107542	0.0211323	-0.974008	-1.53907	3187	3
161	AP2S1	-2.14642	-2.29217	0.00107971	0.0211323	-0.951124	-1.59795	3418	4
160	LSM3	-2.33397	-2.23757	0.0010852	0.0211323	-0.973908	-1.53891	3216	3
159	NSF	-2.12349	-2.1862	0.00108823	0.0211323	-0.951024	-1.59778	3445	4
156	CRNKL1	-2.0289	-1.88164	0.00108886	0.0211323	-0.950996	-1.59773	3447	4
158	SRSF1	-2.51689	-2.12439	0.00109026	0.0211323	-0.973866	-1.53885	3231	3
165	GINS3	-2.3439	-2.34642	0.00111886	0.0213499	-0.950641	-1.59714	3542	4
174	MED21	-2.83168	-3.01025	0.00112366	0.0213499	-0.973653	-1.53851	3330	3
166	BANF1	-2.69103	-2.39042	0.00112973	0.0213499	-0.973582	-1.5384	3348	3
176	VPS25	-3.67481	-3.67481	0.00115813	0.0213499	-0.991469	-1.44789	3161	2
178	GINS2	-3.66956	-4.33085	0.00116279	0.0213499	-0.973326	-1.53799	3446	3
167	KIF23	-2.76649	-2.497	0.00116623	0.0213499	-0.950087	-1.59621	3692	4
171	ATP2A2	-2.95393	-2.91555	0.00117257	0.0213499	-0.973255	-1.53788	3475	3
177	UPF2	-3.40826	-4.05085	0.0011746	0.0213499	-0.973241	-1.53786	3481	3
168	NXF1	-2.7938	-2.51196	0.00117508	0.0213499	-0.950002	-1.59606	3720	4
175	CCT6A	-2.81395	-3.0583	0.00117729	0.0213499	-0.949974	-1.59602	3727	4
173	DTL	-2.74055	-2.9744	0.00119146	0.0213499	-0.973142	-1.5377	3531	3
162	CHORDC1	-1.78957	-1.80638	0.00119971	0.0213499	-0.949704	-1.59556	3798	4
164	RPL8	-2.52117	-2.3244	0.00120097	0.0213499	-0.94969	-1.59554	3802	4
163	PPP6C	-1.9713	-1.88653	0.0012076	0.0213499	-0.949605	-1.5954	3823	4
172	EIF4A1	-2.81048	-2.95877	0.0012117	0.0213499	-0.972971	-1.53743	3591	3
170	SCFD1	-2.69191	-2.64406	0.00121508	0.0213499	-0.972943	-1.53739	3601	3
169	NAA25	-2.49271	-2.55955	0.00121708	0.0213499	-0.949491	-1.5952	3853	4
180	RUVBL1	-3.18329	-2.9034	0.00124392	0.0215087	-0.949165	-1.59466	3938	4
182	SRP19	-3.13631	-3.64443	0.00125055	0.0215087	-0.949094	-1.59454	3959	4
181	ACTL6A	-2.80808	-3.07129	0.00125218	0.0215087	-0.972617	-1.53687	3711	3
179	TRPM7	-2.34536	-2.08906	0.00125353	0.0215087	-0.972588	-1.53683	3715	3
184	PSMG3	-2.03192	-2.21273	0.00129097	0.0219706	-0.948639	-1.59377	4087	4
183	GEMIN5	-1.84013	-1.67349	0.00129445	0.0219706	-0.948583	-1.59368	4098	4
186	RPF1	-2.53889	-1.97906	0.00130987	0.0220273	-0.972162	-1.53616	3882	3
185	NDC1	-1.61341	-1.60343	0.00131182	0.0220273	-0.948384	-1.59334	4153	4
187	ATP6V0C	-3.00137	-2.61567	0.00135507	0.0226326	-0.971793	-1.53557	4016	3
189	ETF1	-3.08721	-3.08721	0.0013746	0.0228292	-0.990688	-1.44675	3752	2
188	U2AF1	-2.51817	-2.50839	0.00138138	0.0228292	-0.971552	-1.53519	4094	3
190	NUP93	-2.06737	-2.1673	0.00140119	0.0230352	-0.947518	-1.59189	4436	4
191	EIF3G	-1.90254	-1.98062	0.00141698	0.0231658	-0.947362	-1.59163	4486	4
192	PFN1	-2.95672	-2.52544	0.00142389	0.0231658	-0.971225	-1.53468	4220	3
193	TMX2	-3.0862	-2.92824	0.00147066	0.0238035	-0.946808	-1.5907	4656	4
194	RPL3	-2.54423	-2.06011	0.00151193	0.0242812	-0.970572	-1.53364	4481	3
195	OXCT2	-2.21377	-2.13154	0.00151564	0.0242812	-0.970544	-1.5336	4492	3
196	ALG1	-1.99715	-1.96273	0.0015275	0.024347	-0.946226	-1.58972	4836	4
198	NIP7	-2.27249	-2.09857	0.00154904	0.024522	-0.970288	-1.53319	4591	3
197	CAP1	-2.30946	-2.03162	0.0015541	0.024522	-0.97026	-1.53315	4606	3
199	PREB	-3.55406	-3.10422	0.00158593	0.0248991	-0.945502	-1.5885	5021	4
200	CLNS1A	-2.35717	-2.53213	0.00159829	0.0249683	-0.969919	-1.53261	4737	3
203	RPS13	-3.15918	-3.65918	0.0016192	0.0251463	-0.969749	-1.53234	4799	3
201	COL9A2	-2.44795	-2.149	0.00162932	0.0251463	-0.969678	-1.53223	4829	3
202	SUPT4H1	-2.47851	-2.77427	0.00163371	0.0251463	-0.96965	-1.53219	4842	3
204	SF3B1	-2.37962	-1.69127	0.00166172	0.0254527	-0.944821	-1.58736	5261	4
206	SNW1	-2.25311	-2.34552	0.00169519	0.0258151	-0.944523	-1.58686	5367	4
205	ACTR10	-1.72929	-1.6066	0.00170182	0.0258151	-0.944466	-1.58676	5388	4
208	IMP3	-2.4182	-2.52946	0.00171161	0.0258195	-0.944395	-1.58664	5419	4
207	TRIT1	-2.14544	-2.09813	0.00171856	0.0258195	-0.944324	-1.58652	5441	4
209	CEP55	-2.61786	-2.92705	0.00172898	0.0258524	-0.944239	-1.58638	5474	4
211	CDK7	-2.84876	-3.27068	0.00175211	0.0259861	-0.968741	-1.53075	5193	3
210	SAP18	-2.36178	-2.04099	0.00175447	0.0259861	-0.968727	-1.53073	5200	3
212	THOC2	-2.32974	-2.34121	0.00177572	0.0261773	-0.943813	-1.58566	5622	4
213	COPA	-2.78217	-2.79031	0.00179593	0.0263515	-0.943628	-1.58535	5686	4
214	NOP16	-1.71128	-1.63961	0.00182846	0.026704	-0.943358	-1.5849	5789	4
215	TBCA	-3.06777	-3.66266	0.00183813	0.026721	-0.968173	-1.52985	5448	3
216	CSNK2B	-2.17965	-2.35768	0.00185309	0.0268143	-0.943131	-1.58452	5867	4
217	EIF4A3	-2.2035	-2.09803	0.00193867	0.027924	-0.942379	-1.58326	6138	4
221	EIF5B	-2.50951	-2.63332	0.00196328	0.0280123	-0.967393	-1.52862	5819	3
220	SPC25	-2.26807	-2.16772	0.00196393	0.0280123	-0.942209	-1.58297	6218	4
218	NUP153	-1.72702	-1.7593	0.00197183	0.0280123	-0.942152	-1.58287	6243	4
219	RBBP4	-2.28026	-1.8042	0.00198049	0.0280123	-0.967279	-1.52844	5870	3
222	ECD	-2.55736	-2.70508	0.00201186	0.0283284	-0.96708	-1.52813	5963	3
223	HINFP	-2.28066	-2.45923	0.00202804	0.0284288	-0.941683	-1.58209	6421	4
224	MED6	-2.14286	-1.99537	0.0021107	0.029456	-0.96647	-1.52716	6256	3
227	MAP3K7	-2.95323	-2.89691	0.00215388	0.0298417	-0.9662	-1.52673	6384	3
226	CPSF2	-2.39557	-2.38895	0.0021586	0.0298417	-0.966172	-1.52669	6398	3
225	CDC73	-2.52956	-2.25349	0.00217299	0.0298417	-0.940548	-1.58018	6880	4
228	RACGAP1	-3.02571	-3.02571	0.00217635	0.0298417	-0.988033	-1.44287	5941	2
229	TRAPPC4	-2.34178	-1.80156	0.00218862	0.0298795	-0.965973	-1.52638	6487	3
230	DDX56	-2.06487	-1.91035	0.00220805	0.0300141	-0.940278	-1.57973	6991	4
231	RPL13	-2.87983	-2.87983	0.00221921	0.0300358	-0.987905	-1.44269	6058	2
232	MED16	-2.12363	-1.84186	0.00223248	0.0300857	-0.965746	-1.52602	6617	3
233	RPS8	-2.19229	-2.26299	0.00224496	0.030094	-0.965675	-1.5259	6654	3
234	WBP11	-2.84465	-2.77182	0.00225226	0.030094	-0.93988	-1.57906	7131	4
236	PRC1	-2.05523	-2.12892	0.00230096	0.0305253	-0.965334	-1.52537	6820	3
235	RER1	-1.92589	-2.01215	0.00230939	0.0305253	-0.965292	-1.5253	6845	3
237	PHAX	-2.86213	-2.86213	0.0023137	0.0305253	-0.987622	-1.44227	6316	2
238	RPA1	-2.47423	-2.42119	0.0023271	0.0305736	-0.939313	-1.5781	7368	4
239	PTPN23	-2.44015	-2.51303	0.00238563	0.031212	-0.964837	-1.52458	7071	3
241	SPTLC1	-2.63126	-2.4637	0.00242611	0.0315274	-0.964624	-1.52424	7191	3
240	POLE2	-2.58859	-2.15664	0.00242982	0.0315274	-0.964596	-1.5242	7202	3
242	FBXO5	-2.85131	-3.02121	0.00251121	0.0324494	-0.93795	-1.57581	7951	4
243	RPS11	-2.50838	-2.46861	0.00257311	0.0331129	-0.937538	-1.57512	8147	4
244	BRD8	-2.02204	-2.01027	0.00258567	0.0331387	-0.963787	-1.52292	7664	3
245	SMC2	-2.24811	-2.36559	0.0026275	0.0334622	-0.963588	-1.52261	7788	3
246	PTAR1	-2.47734	-2.55557	0.00263222	0.0334622	-0.96356	-1.52256	7802	3
247	FIS1	-2.26422	-2.31948	0.00266532	0.0337464	-0.937027	-1.57426	8439	4
248	RPL30	-2.7419	-2.7419	0.00272026	0.0343037	-0.986486	-1.44061	7426	2
249	PCF11	-1.93672	-1.66387	0.00274648	0.0344335	-0.936459	-1.57331	8696	4
250	ISCU	-2.95795	-2.95795	0.00275249	0.0344335	-0.986401	-1.44049	7514	2
251	SNRPB	-2.97744	-3.22172	0.00282011	0.0351395	-0.962509	-1.5209	8359	3
252	NUTF2	-2.58981	-2.56281	0.00289459	0.0359249	-0.935466	-1.57164	9165	4
253	DRD5	-1.80594	-1.81427	0.0029129	0.0360099	-0.935324	-1.5714	9223	4
255	ZNF574	-2.11534	-2.09422	0.00300463	0.0368281	-0.961558	-1.5194	8906	3
256	CENPI	-2.50797	-2.64833	0.00301374	0.0368281	-0.961516	-1.51933	8933	3
254	NSMCE1	-1.69897	-1.71789	0.00301427	0.0368281	-0.934671	-1.57031	9544	4
257	CENPE	-1.83992	-1.80846	0.00312304	0.0380091	-0.961019	-1.51855	9257	3
258	KPNB1	-2.52615	-2.32353	0.00313901	0.038056	-0.933947	-1.56909	9939	4
259	COPG1	-2.21315	-1.90176	0.00316824	0.038169	-0.96082	-1.51823	9391	3
260	MAD2L1	-2.42362	-1.93892	0.00317971	0.038169	-0.960777	-1.51817	9425	3
261	RTEL1	-2.20277	-2.17138	0.0031848	0.038169	-0.933648	-1.56859	10084	4
262	ZNF638	-1.51415	-1.30236	0.00321228	0.0383369	-0.933478	-1.5683	10171	4
263	KANSL1	-2.06071	-1.95604	0.00322323	0.0383369	-0.960593	-1.51787	9554	3
264	NOC4L	-2.07809	-1.94325	0.00324482	0.0383816	-0.960493	-1.51772	9618	3
265	PSMA1	-2.56251	-2.93638	0.00325143	0.0383816	-0.933265	-1.56794	10295	4
266	TMED2	-1.94349	-1.98064	0.00326975	0.0384533	-0.933152	-1.56775	10353	4
267	GSG2	-1.38668	-1.3318	0.00329249	0.0384623	-0.933024	-1.56754	10425	4
268	POLR2G	-2.33584	-2.56361	0.00329501	0.0384623	-0.93301	-1.56751	10433	4
269	CPSF4	-1.73672	-1.71756	0.00333219	0.0386612	-0.960096	-1.51709	9877	3
270	MCM2	-3.09187	-3.09187	0.00333668	0.0386612	-0.984882	-1.43827	9109	2
271	TAF7	-2.32482	-1.89477	0.00337554	0.0389199	-0.932541	-1.56673	10688	4
272	CDC5L	-3.17237	-3.08659	0.0033838	0.0389199	-0.959855	-1.51671	10030	3
273	NOP58	-2.32455	-2.27477	0.00341213	0.0391026	-0.959727	-1.51651	10114	3
274	ACTR6	-2.66522	-2.32878	0.00346577	0.0395728	-0.959457	-1.51608	10273	3
275	YTHDC1	-1.86149	-1.69795	0.00351828	0.039911	-0.93176	-1.56542	11140	4
276	HAUS3	-2.01346	-2.08338	0.00352081	0.039911	-0.931746	-1.56539	11148	4
277	EIF3F	-1.86686	-1.81262	0.00353818	0.0399636	-0.931633	-1.5652	11203	4
279	MCM5	-2.28336	-2.49348	0.00357945	0.0401788	-0.95896	-1.51529	10610	3
278	TCEB2	-1.97983	-1.873	0.00358283	0.0401788	-0.958946	-1.51527	10620	3
280	ELL	-1.78229	-1.71738	0.00362837	0.0405447	-0.958719	-1.51491	10755	3
286	ATP6V1B2	-2.61276	-2.61276	0.00367438	0.0408415	-0.984073	-1.43709	10031	2
283	SLC5A3	-1.84872	-1.704	0.00369415	0.0408415	-0.958421	-1.51444	10950	3
287	TPX2	-2.50054	-2.88735	0.00370393	0.0408415	-0.958392	-1.5144	10979	3
285	SF3B4	-1.91188	-1.98216	0.0037106	0.0408415	-0.930625	-1.56351	11749	4
282	RPF2	-1.66045	-1.54493	0.00372102	0.0408415	-0.930554	-1.56339	11782	4
284	GFI1	-1.94555	-1.96534	0.00373665	0.0408415	-0.958265	-1.5142	11076	3
281	FAM60A	-1.51624	-1.51771	0.00374597	0.0408415	-0.930426	-1.56317	11861	4
292	MCL1	-3.21353	-3.16208	0.00378671	0.0409331	-0.930241	-1.56286	11990	4
290	ZNF407	-2.6633	-2.63727	0.00380682	0.0409331	-0.957981	-1.51375	11284	3
289	RPLP0	-2.47329	-2.52892	0.00381356	0.0409331	-0.957952	-1.5137	11304	3
291	NCBP2	-3.11977	-3.11977	0.00381613	0.0409331	-0.983732	-1.43659	10418	2
288	DLGAP5	-1.81522	-1.89434	0.00381955	0.0409331	-0.930071	-1.56258	12094	4
299	RABGGTB	-2.21981	-2.39414	0.00388429	0.0412806	-0.929702	-1.56196	12299	4
298	CHAF1B	-2.18298	-2.15777	0.00389534	0.0412806	-0.929645	-1.56186	12334	4
300	INCENP	-2.38823	-2.77464	0.00390633	0.0412806	-0.957569	-1.5131	11579	3
295	PSTK	-2.00297	-1.63501	0.00395254	0.0412806	-0.957399	-1.51283	11716	3
302	PISD	-3.25092	-3.25092	0.00395311	0.0412806	-0.983391	-1.43609	10792	2
293	YEATS4	-1.56761	-1.55781	0.0039544	0.0412806	-0.929333	-1.56134	12521	4
294	AURKA	-1.92714	-1.63319	0.00395692	0.0412806	-0.929305	-1.56129	12529	4
297	EXOSC3	-1.88898	-2.02783	0.00397492	0.0412806	-0.929191	-1.5611	12586	4
296	ALG13	-1.85193	-1.91223	0.00398088	0.0412806	-0.957285	-1.51265	11800	3
301	EIF2S3	-2.84591	-3.09834	0.00398345	0.0412806	-0.929157	-1.56104	12613	4
303	CCT8	-1.59834	-1.46241	0.00401503	0.041471	-0.929021	-1.56081	12713	4
304	TRRAP	-2.65653	-2.57357	0.00406184	0.041817	-0.957001	-1.5122	12040	3
306	CDCA8	-2.60349	-2.34157	0.00408987	0.0418507	-0.928637	-1.56017	12950	4
305	FAM96B	-2.0648	-2.28083	0.00409177	0.0418507	-0.928623	-1.56014	12956	4
308	NAA30	-1.70854	-1.75787	0.00412189	0.0419841	-0.956788	-1.51186	12218	3
307	CCT3	-1.82697	-1.65617	0.00413156	0.0419841	-0.928396	-1.55976	13082	4
309	UBA1	-2.31002	-1.99773	0.00416203	0.0421573	-0.956646	-1.51164	12337	3
311	NARFL	-2.5425	-2.5425	0.0042051	0.0423726	-0.982823	-1.43526	11480	2
310	STRAP	-2.10889	-1.98888	0.00421027	0.0423726	-0.956448	-1.51132	12480	3
312	RNMT	-1.77881	-1.79378	0.00422477	0.0423827	-0.956405	-1.51126	12523	3
314	CSNK1A1	-1.70261	-1.60573	0.00432192	0.0430597	-0.956022	-1.51065	12811	3
313	RPS16	-1.83892	-1.59231	0.00432496	0.0430597	-0.956008	-1.51063	12820	3
315	MST1	-1.65968	-1.67677	0.00433339	0.0430597	-0.955979	-1.51058	12845	3
316	TPR	-2.34602	-2.01998	0.00438483	0.0434333	-0.927076	-1.55755	13884	4
317	PLRG1	-1.91066	-1.69751	0.00450004	0.0444343	-0.955355	-1.5096	13339	3
320	PSMC3	-2.3125	-1.91067	0.00455334	0.0447051	-0.955156	-1.50928	13497	3
318	DDX23	-1.51351	-1.41761	0.00458062	0.0447051	-0.926125	-1.55595	14504	4
321	COPS2	-2.07672	-2.00186	0.004581	0.0447051	-0.955056	-1.50913	13579	3
319	THOC1	-1.73681	-1.71961	0.00458441	0.0447051	-0.92611	-1.55592	14516	4
322	EXOSC5	-1.93285	-2.05133	0.0046208	0.0449205	-0.954915	-1.5089	13697	3
324	PFAS	-1.92117	-2.06864	0.00464543	0.0449373	-0.954815	-1.50874	13770	3
326	EEF1A1	-2.80959	-2.80959	0.00465707	0.0449373	-0.98183	-1.43381	12714	2
325	TXNL4A	-2.57892	-2.69671	0.00467031	0.0449373	-0.925727	-1.55528	14788	4
323	SNAPC2	-1.74026	-1.62017	0.00467978	0.0449373	-0.925685	-1.55521	14818	4
338	RPS21	-2.72344	-2.72344	0.00477794	0.0454327	-0.981546	-1.4334	13044	2
336	U2SURP	-2.37532	-2.37532	0.0048142	0.0454327	-0.981475	-1.43329	13143	2
329	FTSJ3	-2.09227	-1.69164	0.0048458	0.0454327	-0.954091	-1.5076	14364	3
333	ZC3H8	-2.01317	-1.86878	0.00484999	0.0454327	-0.924861	-1.55382	15357	4
339	CKAP5	-2.59382	-2.73366	0.00485631	0.0454327	-0.924819	-1.55375	15377	4
334	SMG5	-2.05817	-2.18939	0.00486301	0.0454327	-0.954034	-1.50751	14415	3
337	RIMS3	-2.45383	-2.45383	0.00486365	0.0454327	-0.981376	-1.43315	13278	2
331	CHERP	-2.15138	-1.72338	0.00486503	0.0454327	-0.95402	-1.50749	14421	3
327	CEP85	-1.24388	-1.19846	0.0048721	0.0454327	-0.924762	-1.55366	15427	4
335	MARCH6	-2.28663	-2.30472	0.00491031	0.0454327	-0.924577	-1.55335	15548	4
330	RPA2	-1.87214	-1.72283	0.00491192	0.0454327	-0.95385	-1.50722	14560	3
328	SMNDC1	-1.49118	-1.55142	0.00491631	0.0454327	-0.924549	-1.5533	15567	4
332	KANSL3	-1.83622	-1.78808	0.00491947	0.0454327	-0.924535	-1.55328	15577	4
340	MED18	-1.98957	-1.68135	0.00495949	0.045668	-0.95368	-1.50695	14701	3
341	IRF2BP2	-2.07294	-1.7146	0.0050536	0.0463986	-0.953381	-1.50648	14980	3
342	RPL31	-2.63286	-2.63286	0.00508707	0.0465697	-0.980921	-1.43249	13888	2
343	COL4A3BP	-2.00206	-2.19638	0.00517707	0.0472558	-0.952956	-1.50581	15346	3
344	LARS	-2.90077	-2.90077	0.00519292	0.0472631	-0.980708	-1.43217	14177	2
345	RPS19BP1	-2.30852	-1.73033	0.00521147	0.0472949	-0.952842	-1.50563	15448	3
346	CSE1L	-2.38045	-2.38045	0.00529731	0.0479353	-0.980481	-1.43184	14462	2
347	HYOU1	-2.0755	-2.08233	0.00532178	0.0480184	-0.952444	-1.505	15775	3
351	MAU2	-2.87842	-2.0983	0.00538554	0.0482494	-0.952232	-1.50466	15964	3
353	MYB	-2.56327	-2.71497	0.00539695	0.0482494	-0.922448	-1.54977	17089	4
349	XAB2	-1.91107	-1.54025	0.00541624	0.0482494	-0.952132	-1.50451	16055	3
350	GALE	-1.6218	-1.58238	0.00542366	0.0482494	-0.952104	-1.50446	16077	3
352	PGD	-2.56713	-2.32185	0.00543106	0.0482494	-0.922292	-1.54951	17197	4
348	UBA2	-1.63508	-1.40813	0.00543958	0.0482494	-0.922235	-1.54941	17224	4
354	SF3B5	-3.11655	-3.13824	0.00547831	0.048456	-0.951919	-1.50417	16239	3
355	RPL18A	-2.43623	-2.43623	0.00549765	0.0484745	-0.980041	-1.4312	15009	2
356	MED14	-2.79184	-2.8943	0.00551127	0.0484745	-0.921937	-1.54891	17451	4
357	CCT5	-2.01641	-2.12382	0.00556338	0.0487961	-0.921724	-1.54855	17616	4
360	WDR1	-1.97046	-1.98875	0.00564738	0.0490896	-0.921355	-1.54793	17882	4
361	CENPT	-1.93033	-2.06355	0.005649	0.0490896	-0.951408	-1.50336	16745	3
359	EIF5	-1.89907	-1.72101	0.00565406	0.0490896	-0.951394	-1.50334	16760	3
358	BCAP31	-1.43646	-1.43231	0.00565938	0.0490896	-0.921298	-1.54784	17920	4
362	SZT2	-1.62973	-1.58389	0.00569285	0.049244	-0.921156	-1.5476	18026	4
363	SMC4	-2.40102	-2.10212	0.00582675	0.0502637	-0.920546	-1.54657	18450	4
365	ATP6V1F	-2.41818	-2.41818	0.00588663	0.0505661	-0.979275	-1.43008	16071	2
364	CHAF1A	-2.03598	-1.65626	0.00589402	0.0505661	-0.920262	-1.5461	18663	4
366	SRSF3	-2.34958	-2.28468	0.00595563	0.0509556	-0.950415	-1.50179	17654	3
367	RNPS1	-1.80073	-1.81428	0.00597958	0.0510215	-0.950344	-1.50168	17725	3
368	POLE	-2.07436	-1.9613	0.00606739	0.0516303	-0.919566	-1.54493	19212	4
369	ATP6V1D	-1.93717	-1.66422	0.00610743	0.0518307	-0.949918	-1.50101	18104	3
370	MCM6	-1.50228	-1.51565	0.00629027	0.0531494	-0.949364	-1.50013	18646	3
371	C12orf45	-2.26009	-1.88038	0.00629668	0.0531494	-0.949336	-1.50009	18665	3
372	GTF2F2	-1.62576	-1.6744	0.0063547	0.0534134	-0.949165	-1.49982	18837	3
374	HSPA9	-2.45635	-2.85947	0.0063696	0.0534134	-0.918416	-1.543	20169	4
373	CFLAR	-1.88863	-2.07351	0.00637899	0.0534134	-0.949094	-1.4997	18909	3
375	SMG1	-2.21941	-2.42578	0.00639923	0.0534404	-0.949038	-1.49962	18969	3
376	CCT7	-1.77926	-1.66109	0.00642183	0.0534869	-0.948952	-1.49948	19036	3
377	SUDS3	-2.28422	-2.28422	0.00654078	0.0543335	-0.978068	-1.42832	17857	2
378	POLR3B	-2.19249	-2.44151	0.00656655	0.0544036	-0.948526	-1.49881	19465	3
379	NOP56	-2.04384	-1.70995	0.00664987	0.0549489	-0.948257	-1.49838	19712	3
380	SRP54	-2.18233	-2.52682	0.0067089	0.0552912	-0.948086	-1.49811	19887	3
381	ORC6	-2.28455	-2.28455	0.0067349	0.0553602	-0.977699	-1.42778	18387	2
382	SAMD4B	-1.64701	-1.46154	0.00687487	0.0563632	-0.947604	-1.49735	20379	3
387	POLR2D	-2.41311	-2.36904	0.00695381	0.0567692	-0.947362	-1.49697	20613	3
384	WDR61	-1.84156	-1.69332	0.00698417	0.0567692	-0.947277	-1.49683	20703	3
386	ATP1B3	-2.10932	-2.17015	0.00700941	0.0567692	-0.916017	-1.53897	22195	4
388	BCL2	-2.64169	-3.13261	0.00701014	0.0567692	-0.947206	-1.49672	20780	3
385	RBM19	-1.73891	-1.83553	0.00702734	0.0567692	-0.947164	-1.49665	20831	3
389	SLC7A6OS	-2.93029	-3.53837	0.00703688	0.0567692	-0.915883	-1.53874	22282	4
383	YAE1D1	-2.02334	-1.62461	0.00705096	0.0567692	-0.947093	-1.49654	20901	3
390	AP2M1	-2.41069	-1.73503	0.00707626	0.0568272	-0.947022	-1.49643	20976	3
393	HPCAL4	-1.79646	-1.61015	0.00718973	0.0574051	-0.915322	-1.5378	22766	4
392	WDR92	-1.52384	-1.45624	0.00720377	0.0574051	-0.946695	-1.49591	21354	3
394	MIS12	-2.21163	-1.95956	0.00722097	0.0574051	-0.946638	-1.49582	21405	3
391	HECTD1	-1.1994	-1.19202	0.00722225	0.0574051	-0.915194	-1.53758	22869	4
395	CDC7	-2.93078	-2.69053	0.00723962	0.0574051	-0.915137	-1.53749	22924	4
397	KCMF1	-2.15871	-2.15871	0.007281	0.0575128	-0.976705	-1.42633	19878	2
396	ZMYND12	-1.54396	-1.35995	0.00728983	0.0575128	-0.914995	-1.53725	23083	4
398	GMPPB	-1.77056	-1.7815	0.00735625	0.0578913	-0.946269	-1.49524	21806	3
403	ORAOV1	-2.53793	-2.23722	0.00743163	0.0581167	-0.914527	-1.53646	23532	4
399	RPL18	-1.91859	-1.44638	0.00743215	0.0581167	-0.946056	-1.4949	22031	3
405	UTP20	-2.50742	-2.84048	0.00746385	0.0581167	-0.945957	-1.49475	22125	3
404	NRF1	-2.34595	-2.34595	0.00747696	0.0581167	-0.97635	-1.42581	20413	2
401	MCRS1	-2.15419	-2.08451	0.007497	0.0581167	-0.9143	-1.53608	23739	4
402	PKMYT1	-2.17715	-2.17715	0.00750955	0.0581167	-0.976294	-1.42573	20502	2
400	METTL16	-2.37051	-1.76181	0.00751445	0.0581167	-0.945815	-1.49452	22275	3
406	SEC31A	-2.13534	-2.13534	0.00760881	0.0587019	-0.976109	-1.42546	20773	2
407	NAA35	-2.38464	-2.30577	0.00765108	0.0588833	-0.945418	-1.4939	22680	3
408	RIOK2	-1.81253	-1.84374	0.00770858	0.0591808	-0.913561	-1.53484	24409	4
409	RHOA	-1.56447	-1.57263	0.00776509	0.0594693	-0.94512	-1.49342	23018	3
411	CNEP1R1	-2.25031	-2.25031	0.00781282	0.0596793	-0.975754	-1.42494	21330	2
410	PRMT5	-2.01276	-2.18279	0.00783054	0.0596793	-0.944921	-1.49311	23212	3
412	DHFR	-2.59033	-2.59033	0.0078608	0.059765	-0.975669	-1.42482	21461	2
413	YKT6	-2.47864	-2.23879	0.00791453	0.0600281	-0.944694	-1.49275	23461	3
414	KIF11	-1.95283	-1.74909	0.00793911	0.0600694	-0.912738	-1.53346	25139	4
417	PPP1CB	-2.69324	-2.69324	0.00797764	0.0600724	-0.975484	-1.42455	21780	2
416	CFL1	-2.24299	-2.61016	0.00798806	0.0600724	-0.912589	-1.53321	25294	4
415	NUP155	-1.41683	-1.3187	0.0079969	0.0600724	-0.912568	-1.53317	25322	4
418	HSPA14	-1.33071	-1.18233	0.00803701	0.0602296	-0.912426	-1.53293	25449	4
419	SPI1	-2.00389	-1.51135	0.00806397	0.0602878	-0.944268	-1.49208	23904	3
420	SDHB	-1.36816	-1.2071	0.00812796	0.0605956	-0.912142	-1.53246	25737	4
421	RPL36	-2.22027	-2.40336	0.00814375	0.0605956	-0.912086	-1.53236	25787	4
422	FCF1	-2.30019	-2.30019	0.00823	0.0610927	-0.975059	-1.42392	22469	2
423	PLK4	-1.50077	-1.41602	0.00826502	0.061208	-0.943686	-1.49116	24500	3
424	CLTC	-1.67225	-1.77082	0.00832375	0.0614978	-0.911517	-1.53141	26357	4
426	PSMD12	-2.81895	-2.7554	0.00835543	0.0615372	-0.943459	-1.4908	24768	3
425	CITED4	-1.91427	-2.11262	0.00836828	0.0615372	-0.911389	-1.53119	26498	4
427	SNAPC3	-1.58275	-1.25531	0.00841565	0.061741	-0.911276	-1.531	26648	4
428	TDP2	-1.87431	-1.59672	0.00851937	0.0622332	-0.943019	-1.4901	25254	3
429	MAT2A	-1.93204	-2.10333	0.00852238	0.0622332	-0.910935	-1.53043	26986	4
430	CDC23	-2.07711	-1.6659	0.00854366	0.0622438	-0.942962	-1.49001	25326	3
433	MYC	-2.08129	-2.22262	0.00857605	0.0623143	-0.942877	-1.48988	25422	3
432	NARS	-2.59033	-2.01906	0.00862376	0.0623143	-0.910609	-1.52988	27307	4
434	CENPN	-2.3328	-2.77119	0.00862723	0.0623143	-0.9106	-1.52987	27318	4
431	CCDC86	-1.90925	-1.98027	0.00863272	0.0623143	-0.942735	-1.48966	25590	3
435	HAUS8	-1.62889	-1.52146	0.00868123	0.0625208	-0.910424	-1.52957	27489	4
436	SRBD1	-2.50824	-3.06282	0.00875416	0.0629017	-0.942422	-1.48916	25950	3
437	AHCY	-1.51562	-1.47525	0.00880543	0.0631257	-0.942295	-1.48896	26102	3
442	VPS52	-1.98655	-1.71359	0.00888572	0.0633401	-0.942067	-1.4886	26340	3
445	GPN1	-2.52043	-3.00527	0.00890323	0.0633401	-0.909743	-1.52843	28192	4
439	RNF20	-1.68419	-1.4353	0.00890829	0.0633401	-0.909728	-1.5284	28208	4
444	ARHGAP11A	-2.20124	-2.28334	0.0089266	0.0633401	-0.909677	-1.52831	28266	4
440	SF3A2	-2.83116	-1.50723	0.00895487	0.0633401	-0.941883	-1.48831	26545	3
443	LUC7L3	-1.74898	-1.80104	0.00896387	0.0633401	-0.909558	-1.52811	28384	4
438	PABPC4	-1.47648	-1.22203	0.00897934	0.0633401	-0.909501	-1.52802	28433	4
441	SKA3	-1.67789	-1.57201	0.00899671	0.0633401	-0.909459	-1.52795	28488	4
446	QARS	-2.22749	-2.38969	0.00904157	0.0635135	-0.941642	-1.48793	26802	3
447	MED26	-1.40638	-1.28895	0.00929419	0.064965	-0.908564	-1.52644	29430	4
449	PDPK1	-1.53526	-1.40616	0.00930651	0.064965	-0.908522	-1.52637	29469	4
453	CDC45	-3.32292	-3.36836	0.00931724	0.064965	-0.908487	-1.52631	29503	4
452	AHCTF1	-2.57588	-2.57588	0.00934858	0.064965	-0.973213	-1.42123	25523	2
451	GRPEL1	-2.16597	-2.44993	0.00935924	0.064965	-0.908364	-1.52611	29636	4
448	ZNF28	-1.49609	-1.39868	0.00938059	0.064965	-0.940761	-1.48654	27807	3
450	POLR1B	-1.63425	-1.66512	0.00939303	0.064965	-0.908266	-1.52594	29743	4
454	WDR25	-1.73872	-1.8821	0.00943186	0.0650902	-0.940619	-1.48631	27959	3
458	DNAJC17	-2.14161	-2.14161	0.00954306	0.0655964	-0.972915	-1.42079	26054	2
457	RAD17	-2.11445	-2.11445	0.00958702	0.0655964	-0.972844	-1.42069	26174	2
459	CDC20	-2.61485	-2.58444	0.00959783	0.0655964	-0.940222	-1.48569	28451	3
455	HAUS4	-1.48808	-1.36008	0.00959862	0.0655964	-0.907713	-1.52501	30394	4
456	CCNH	-1.96786	-2.09648	0.00960967	0.0655964	-0.907684	-1.52497	30429	4
460	PSMD11	-2.87383	-2.87383	0.00964049	0.0656641	-0.972773	-1.42059	26320	2
461	DHX33	-1.66895	-1.59786	0.00985285	0.0669653	-0.93964	-1.48477	29207	3
462	EIF3B	-2.06994	-1.88433	0.00989232	0.0670266	-0.939526	-1.48459	29324	3
463	POLR3F	-2.23284	-2.23284	0.00990457	0.0670266	-0.972347	-1.41996	27041	2
464	COG1	-1.68864	-1.81652	0.00994596	0.067162	-0.939384	-1.48436	29483	3
466	ANAPC1	-1.55915	-1.5629	0.0101129	0.0679656	-0.939015	-1.48378	29978	3
467	CPSF1	-1.81925	-1.89466	0.010113	0.0679656	-0.90625	-1.52256	32023	4
465	WDR7	-1.38593	-1.21236	0.0101686	0.0679656	-0.906108	-1.52232	32199	4
469	WDR82	-2.45379	-2.18587	0.0101775	0.0679656	-0.906084	-1.52228	32227	4
468	AARS	-1.92252	-2.0282	0.0101892	0.0679656	-0.938845	-1.48351	30204	3
470	SAE1	-2.3416	-2.45633	0.0101948	0.0679656	-0.906038	-1.5222	32282	4
472	BUD31	-2.63163	-2.84903	0.0103047	0.0685461	-0.90574	-1.5217	32630	4
471	IGBP1	-1.87093	-1.69386	0.0103256	0.0685461	-0.905668	-1.52158	32696	4
473	NDC80	-2.24316	-2.36609	0.0103568	0.0686086	-0.905578	-1.52143	32795	4
474	NCAPG2	-1.36462	-1.27537	0.0104746	0.0692429	-0.905228	-1.52084	33168	4
476	KIF20A	-2.31461	-2.55463	0.0105461	0.0695338	-0.938022	-1.48221	31262	3
475	ALG2	-2.18743	-2.44306	0.0105629	0.0695338	-0.937979	-1.48214	31312	3
477	COG6	-1.99855	-1.85559	0.0106025	0.0696484	-0.904916	-1.52032	33573	4
478	MEAF6	-1.45935	-1.4666	0.0106307	0.069688	-0.937837	-1.48192	31513	3
479	DDX47	-2.39971	-2.56858	0.0108001	0.0706506	-0.937454	-1.48131	32015	3
480	CDC26	-1.39408	-1.36018	0.010853	0.0708488	-0.904249	-1.51919	34366	4
482	NUP205	-1.87544	-1.4238	0.0109022	0.0708852	-0.904135	-1.519	34522	4
481	DHX8	-1.5054	-1.32956	0.0109131	0.0708852	-0.937213	-1.48093	32350	3
483	SLC2A1	-1.5355	-1.47913	0.0109263	0.0708852	-0.937184	-1.48089	32389	3
486	BRF2	-2.46463	-2.46463	0.01101	0.0711946	-0.970658	-1.4175	30059	2
485	TARS	-1.80855	-1.90177	0.0110289	0.0711946	-0.903809	-1.51846	34923	4
484	SNRPD1	-1.69373	-1.43001	0.011042	0.0711946	-0.936929	-1.48048	32732	3
488	ATP6V0D1	-1.83153	-1.46524	0.0110895	0.0712359	-0.936815	-1.4803	32873	3
489	USPL1	-1.91637	-1.73502	0.011104	0.0712359	-0.936787	-1.48026	32916	3
490	IRF8	-2.06889	-1.90563	0.0111173	0.0712359	-0.903567	-1.51805	35203	4
487	SKA2	-1.48585	-1.45476	0.0111391	0.0712359	-0.936701	-1.48012	33020	3
491	WAPAL	-2.03421	-2.08099	0.0112824	0.0719395	-0.903142	-1.51733	35726	4
492	ZCCHC9	-2.11801	-2.1599	0.011295	0.0719395	-0.936361	-1.47958	33482	3
493	ZBTB8OS	-1.67165	-1.56915	0.0114312	0.0726601	-0.936063	-1.47911	33886	3
494	PSMD3	-1.43373	-1.25017	0.0114697	0.0727266	-0.90263	-1.51648	36319	4
495	SEC23B	-2.55868	-2.09356	0.011488	0.0727266	-0.902588	-1.5164	36377	4
496	COPE	-2.0069	-2.2008	0.0115459	0.0729461	-0.935807	-1.47871	34226	3
497	WBSCR22	-1.89862	-1.89862	0.0116106	0.0732076	-0.969792	-1.41623	31699	2
498	WDR75	-1.87159	-1.74397	0.0116627	0.0733882	-0.935552	-1.47831	34572	3
499	UTP23	-1.7451	-1.68471	0.0117008	0.0734808	-0.935466	-1.47817	34685	3
500	SMC5	-2.12983	-2.24032	0.0117288	0.0735097	-0.93541	-1.47808	34768	3
501	POLR3A	-2.4693	-2.36549	0.011861	0.0741902	-0.90161	-1.51476	37558	4
502	NKAP	-1.86471	-1.76442	0.0119573	0.074644	-0.901395	-1.5144	37863	4
503	DKC1	-1.61978	-1.72907	0.012001	0.0747681	-0.934799	-1.47712	35575	3
504	RPL7	-2.10128	-1.98755	0.0120782	0.0751004	-0.934615	-1.47683	35804	3
505	WDHD1	-1.65238	-1.59702	0.0121142	0.0751754	-0.900984	-1.51371	38360	4
507	PHF5A	-2.23933	-2.23933	0.0122688	0.0758767	-0.968869	-1.41489	33496	2
506	C10orf118	-1.34433	-1.33231	0.0122756	0.0758767	-0.934189	-1.47615	36389	3
508	TTK	-2.06434	-2.26146	0.0123363	0.0761022	-0.934075	-1.47597	36569	3
510	CENPK	-2.87576	-2.87576	0.012382	0.0761397	-0.968699	-1.41464	33805	2
509	LCMT1	-1.35655	-1.20181	0.0123909	0.0761397	-0.900317	-1.51259	39236	4
511	PDCD10	-1.99165	-1.99165	0.0124593	0.0763925	-0.9686	-1.41449	34016	2
512	NPAT	-2.97942	-2.79766	0.0124807	0.0763925	-0.933791	-1.47552	36997	3
513	PRELID1	-2.01876	-2.01876	0.0125574	0.0767127	-0.968443	-1.41426	34284	2
514	SNRNP27	-1.66871	-1.47402	0.0126801	0.0772088	-0.933366	-1.47485	37588	3
515	CBFB	-1.48883	-1.5212	0.0126878	0.0772088	-0.933351	-1.47483	37611	3
516	UTP15	-1.57553	-1.50807	0.0127345	0.0773428	-0.899465	-1.51116	40324	4
517	EIF3D	-2.33521	-1.79718	0.0127964	0.0774707	-0.899323	-1.51092	40520	4
518	ACLY	-2.0899	-2.19817	0.0128049	0.0774707	-0.933096	-1.47442	37958	3
519	INTS8	-1.75364	-1.5913	0.0128428	0.0775507	-0.899209	-1.51073	40667	4
522	MED1	-2.88318	-2.88318	0.0129167	0.0778078	-0.967961	-1.41356	35265	2
521	EXOSC7	-2.25025	-2.27572	0.0129407	0.0778078	-0.898996	-1.51037	40977	4
520	ING3	-1.64995	-1.46204	0.0129597	0.0778078	-0.932783	-1.47393	38417	3
523	CDK11A	-1.99926	-1.99926	0.013009	0.0779549	-0.967847	-1.41339	35517	2
524	SLU7	-2.0488	-1.43046	0.013043	0.0780097	-0.932599	-1.47364	38664	3
526	SAMM50	-1.5983	-1.55974	0.0131598	0.0783409	-0.898457	-1.50946	41671	4
528	RPL23	-2.33353	-2.33353	0.0131889	0.0783409	-0.967592	-1.41302	36008	2
525	ILF3	-1.45599	-1.52217	0.0131911	0.0783409	-0.932315	-1.47319	39103	3
527	PSMC4	-2.03666	-2.14495	0.0131982	0.0783409	-0.932301	-1.47317	39124	3
529	DMAP1	-1.72718	-1.84286	0.0132817	0.0786656	-0.898159	-1.50896	42057	4
531	PSMD4	-2.00606	-2.27509	0.0133215	0.0786656	-0.898074	-1.50882	42183	4
530	UBA52	-1.85217	-1.85217	0.0133281	0.0786656	-0.967421	-1.41277	36388	2
532	ANAPC2	-2.00686	-2.00686	0.0133984	0.0789323	-0.967322	-1.41263	36580	2
533	EBF2	-1.37486	-1.35606	0.0135241	0.0793761	-0.931605	-1.47207	40090	3
534	RPL14	-2.08478	-2.18154	0.0135243	0.0793761	-0.897591	-1.50801	42825	4
535	NPLOC4	-1.44687	-1.37937	0.0136573	0.0799452	-0.931336	-1.47164	40485	3
536	EMC3	-2.0329	-2.27159	0.0136722	0.0799452	-0.931307	-1.4716	40529	3
539	POP5	-1.84013	-1.84013	0.0137559	0.0800682	-0.966839	-1.41192	37556	2
537	PIK3C3	-1.50118	-1.4379	0.01377	0.0800682	-0.931123	-1.47131	40819	3
540	RBBP5	-1.84336	-1.84336	0.0138038	0.0800682	-0.966768	-1.41182	37687	2
541	PSMB1	-3.94053	-4.64668	0.0138081	0.0800682	-0.931041	-1.47118	40932	3
538	PGBD2	-1.81482	-1.81482	0.0138207	0.0800682	-0.96674	-1.41178	37733	2
542	SRSF11	-1.49661	-1.48252	0.0139541	0.0806921	-0.896626	-1.50639	44186	4
543	RBX1	-2.29512	-1.29942	0.0139926	0.0807662	-0.930683	-1.47061	41479	3
544	EXOSC2	-1.57936	-1.3207	0.0140943	0.0812038	-0.896356	-1.50593	44630	4
545	CPSF3	-1.90007	-1.68883	0.0143093	0.0822918	-0.895873	-1.50512	45311	4
546	DHX15	-2.41939	-2.62307	0.0144246	0.0828031	-0.895632	-1.50472	45676	4
548	GMNN	-1.86617	-1.80193	0.0144824	0.0829403	-0.895518	-1.50453	45859	4
547	GNL2	-1.42712	-1.38535	0.0145013	0.0829403	-0.89549	-1.50448	45919	4
549	IPPK	-1.8921	-1.49901	0.0145535	0.083001	-0.895376	-1.50429	46084	4
550	TICRR	-2.25611	-2.25163	0.0145648	0.083001	-0.895348	-1.50424	46120	4
551	PSMA7	-3.1722	-3.82135	0.0148231	0.08432	-0.929093	-1.4681	43941	3
554	POLR2B	-2.41531	-2.23363	0.0149615	0.0847791	-0.894482	-1.50279	47376	4
553	LSG1	-2.01131	-2.01131	0.0149638	0.0847791	-0.965264	-1.40962	40854	2
552	CTR9	-1.49269	-1.54172	0.0149848	0.0847791	-0.894425	-1.50269	47450	4
555	ZNF136	-1.71131	-1.6084	0.015062	0.0850622	-0.928653	-1.4674	44649	3
556	CSTF3	-1.72636	-1.33009	0.015239	0.0859077	-0.893886	-1.50178	48255	4
558	SPC24	-2.40255	-2.40255	0.0153674	0.0863509	-0.964724	-1.40883	41956	2
557	ABCF1	-2.03771	-2.1068	0.0153727	0.0863509	-0.928071	-1.46648	45570	3
559	UBTF	-1.77378	-1.77378	0.0155018	0.0869014	-0.964568	-1.4086	42323	2
560	RBM48	-1.91776	-1.91776	0.015526	0.0869014	-0.96454	-1.40856	42389	2
561	CDIPT	-1.87816	-1.92955	0.0155592	0.0869322	-0.92773	-1.46595	46123	3
562	MTPAP	-1.83452	-1.83452	0.0155909	0.0869543	-0.964455	-1.40844	42566	2
563	MARS	-1.85159	-1.82792	0.015666	0.0872185	-0.892977	-1.50026	49607	4
569	RPS14	-1.94496	-2.12851	0.0157841	0.0875004	-0.892722	-1.49983	49981	4
566	INTS5	-1.63767	-1.6257	0.0158112	0.0875004	-0.927276	-1.46523	46870	3
568	MFN2	-1.97118	-1.97118	0.0158436	0.0875004	-0.964142	-1.40798	43256	2
564	CDC25A	-1.43485	-1.45833	0.0158631	0.0875004	-0.892566	-1.49957	50231	4
567	PDRG1	-1.76777	-1.74623	0.0158746	0.0875004	-0.927162	-1.46505	47058	3
565	GNL3	-1.68134	-1.55224	0.0158921	0.0875004	-0.892509	-1.49947	50323	4
570	RFC4	-2.46829	-2.46829	0.0159117	0.0875004	-0.964057	-1.40786	43442	2
571	PPAT	-1.44525	-1.21373	0.0159947	0.0878031	-0.926949	-1.46471	47414	3
572	LSM10	-1.98352	-1.98352	0.0161055	0.0882568	-0.963802	-1.40749	43971	2
573	HNRNPL	-1.40217	-1.45216	0.0161721	0.0884678	-0.926651	-1.46424	47940	3
574	HAUS1	-1.29937	-1.28103	0.0163428	0.089246	-0.926339	-1.46375	48446	3
576	MTF1	-2.39576	-2.39576	0.0164102	0.0893846	-0.963418	-1.40693	44803	2
575	MBTPS1	-2.04985	-2.03037	0.0164251	0.0893846	-0.926182	-1.4635	48690	3
577	SEC61A1	-1.81775	-1.80401	0.0165417	0.0898632	-0.891146	-1.49718	52380	4
578	DNA2	-3.11811	-3.11811	0.0168058	0.09114	-0.962936	-1.40622	45883	2
579	GUK1	-1.67527	-1.85369	0.0169655	0.0917579	-0.89028	-1.49573	53722	4
580	EXOSC4	-2.33691	-2.09295	0.0169781	0.0917579	-0.890249	-1.49567	53762	4
581	NCAPD2	-3.5276	-3.5276	0.0171024	0.0922709	-0.962552	-1.40566	46693	2
582	CCT4	-1.47752	-1.3004	0.0171641	0.0924449	-0.889854	-1.49501	54351	4
589	CCDC94	-2.29337	-2.1586	0.0173177	0.0929272	-0.924607	-1.46101	51336	3
586	SNUPN	-1.52993	-1.50725	0.0173359	0.0929272	-0.889514	-1.49444	54895	4
584	ARMC7	-1.71359	-1.39953	0.0173631	0.0929272	-0.889457	-1.49434	54981	4
587	RPAIN	-1.9724	-1.9724	0.0173947	0.0929272	-0.962197	-1.40514	47491	2
588	PSMD2	-1.96858	-2.0209	0.0174058	0.0929272	-0.924451	-1.46076	51597	3
585	EIF2B1	-1.53967	-1.48288	0.0174442	0.0929272	-0.924394	-1.46067	51711	3
590	SF1	-2.09294	-2.21979	0.0174777	0.0929272	-0.88923	-1.49396	55344	4
583	GNB2L1	-1.66733	-1.20574	0.0174904	0.0929272	-0.924323	-1.46056	51848	3
592	WDR70	-1.91404	-1.53346	0.0175545	0.0929545	-0.924209	-1.46038	52038	3
591	TROAP	-1.11589	-1.0577	0.0175548	0.0929545	-0.889073	-1.4937	55588	4
593	PSMB4	-2.24307	-2.19512	0.0175943	0.0930067	-0.888992	-1.49356	55713	4
595	NAT1	-1.70636	-1.70636	0.0176427	0.0930462	-0.961899	-1.40471	48168	2
597	COPS8	-1.95522	-1.95522	0.0176943	0.0930462	-0.961828	-1.4046	48309	2
596	MBTPS2	-1.88487	-1.78492	0.0176949	0.0930462	-0.923982	-1.46002	52454	3
594	POLR3C	-1.42777	-1.46218	0.0177203	0.0930462	-0.888747	-1.49315	56112	4
599	SLC38A2	-1.68535	-1.7288	0.0177579	0.0930736	-0.923869	-1.45984	52641	3
598	MIOS	-1.57265	-1.3319	0.0177924	0.0930736	-0.923812	-1.45975	52743	3
600	INTS9	-1.84512	-2.06236	0.01782	0.0930736	-0.888557	-1.49283	56428	4
601	POLD3	-2.58275	-2.5479	0.017844	0.0930736	-0.888514	-1.49276	56504	4
602	C7orf26	-1.39423	-1.09685	0.0180411	0.0939454	-0.888151	-1.49215	57128	4
603	RRH	-1.76121	-1.76121	0.0181752	0.0944871	-0.961232	-1.40373	49622	2
604	HUWE1	-1.69621	-1.76777	0.0182432	0.0946838	-0.887753	-1.49148	57768	4
605	TRIM24	-1.29164	-1.24532	0.0183577	0.0951209	-0.922875	-1.45827	54419	3
606	CAND1	-1.28501	-1.23148	0.0184124	0.0952469	-0.922776	-1.45812	54581	3
607	EPB41L5	-1.68404	-1.68404	0.018477	0.0954241	-0.960863	-1.40319	50446	2
608	CMPK1	-1.81651	-1.22214	0.0185122	0.0954489	-0.922605	-1.45785	54877	3
609	RPL38	-2.14148	-1.89625	0.0186152	0.0958226	-0.887029	-1.49026	58946	4
610	TOPBP1	-2.38184	-2.38184	0.0186569	0.0958798	-0.960664	-1.4029	50937	2
613	DIS3	-2.2105	-2.04605	0.0187511	0.0960892	-0.922208	-1.45722	55585	3
614	RUVBL2	-2.20317	-2.3721	0.0188081	0.0960892	-0.922123	-1.45709	55754	3
615	GOSR2	-2.60567	-2.67597	0.0188319	0.0960892	-0.886603	-1.48955	59632	4
611	HIRA	-1.11209	-1.11389	0.0188401	0.0960892	-0.886589	-1.48953	59658	4
612	USP39	-1.789	-1.789	0.0188506	0.0960892	-0.960423	-1.40255	51466	2
616	SEC13	-2.26489	-2.26489	0.0188854	0.0961105	-0.96038	-1.40249	51561	2
617	KMT2A	-1.78343	-1.74876	0.0190044	0.0965595	-0.92181	-1.45659	56336	3
618	CHMP4B	-1.75411	-1.61692	0.0190628	0.0966996	-0.921725	-1.45646	56509	3
619	SNIP1	-1.6809	-1.6809	0.0191129	0.0967974	-0.960097	-1.40207	52182	2
620	UFD1L	-2.25109	-2.18952	0.0192098	0.0971318	-0.921484	-1.45608	56945	3
623	GAD1	-1.84137	-1.84137	0.0193213	0.0973421	-0.959855	-1.40172	52751	2
621	PSMB7	-1.36404	-1.18932	0.0193258	0.0973421	-0.885652	-1.48795	61196	4
622	LSM5	-1.59772	-1.65656	0.0193444	0.0973421	-0.921257	-1.45572	57344	3
626	RABGGTA	-1.49638	-1.32511	0.0195333	0.0979903	-0.920944	-1.45522	57904	3
624	ZMYND8	-1.23452	-1.13283	0.0195702	0.0979903	-0.885241	-1.48726	61970	4
629	EMC6	-1.64832	-1.64832	0.0195879	0.0979903	-0.959557	-1.40129	53479	2
627	EXOSC9	-1.48766	-1.43049	0.0196071	0.0979903	-0.885184	-1.48716	62087	4
632	NRDE2	-1.86123	-1.86123	0.0196923	0.0979903	-0.959429	-1.4011	53764	2
628	ALYREF	-1.76224	-1.46671	0.019733	0.0979903	-0.920632	-1.45473	58496	3
634	TBP	-1.90256	-1.90256	0.0197458	0.0979903	-0.959373	-1.40102	53910	2
630	FBXO32	-1.69433	-1.69433	0.0197586	0.0979903	-0.959358	-1.401	53945	2
631	SART3	-1.80665	-1.85526	0.0197805	0.0979903	-0.884871	-1.48664	62636	4
636	MKI67IP	-2.16839	-2.16839	0.0197875	0.0979903	-0.959316	-1.40093	54024	2
633	RRP36	-1.86597	-1.86597	0.0198948	0.0979903	-0.959202	-1.40077	54317	2
635	ATP6AP2	-1.89402	-1.99108	0.019895	0.0979903	-0.920348	-1.45428	58976	3
637	TRAPPC3	-2.05353	-2.25059	0.0198955	0.0979903	-0.884659	-1.48628	63000	4
625	PSMD7	-1.49605	-1.28515	0.0199101	0.0979903	-0.92032	-1.45424	59021	3
639	NOL9	-1.55991	-1.64314	0.0200549	0.0984313	-0.920093	-1.45388	59450	3
638	MYH9	-1.35719	-1.29485	0.020065	0.0984313	-0.920078	-1.45386	59480	3
640	DHDDS	-2.17836	-2.1408	0.0200938	0.0984313	-0.884298	-1.48568	63628	4
641	PRPF39	-1.62202	-1.58613	0.0201385	0.0984968	-0.919965	-1.45368	59698	3
642	HGS	-1.81951	-1.93682	0.0202725	0.098998	-0.883983	-1.48515	64194	4
643	KCNQ4	-2.06923	-2.06923	0.0203322	0.0991351	-0.958691	-1.40002	55511	2
649	SON	-2.01744	-2.01744	0.0203871	0.0991553	-0.958634	-1.39994	55661	2
645	UGP2	-1.38496	-1.35601	0.0204172	0.0991553	-0.883722	-1.48471	64652	4
644	AHCYL1	-1.48092	-1.25087	0.0204357	0.0991553	-0.919468	-1.45289	60579	3
648	CCDC17	-1.83282	-1.83282	0.0204765	0.0991553	-0.958535	-1.39979	55905	2
646	POLR1C	-1.7627	-1.79108	0.020521	0.0991553	-0.91934	-1.45269	60832	3
647	TFRC	-2.05775	-1.82186	0.0205258	0.0991553	-0.883523	-1.48437	64996	4
650	UNC50	-1.54724	-1.36822	0.0206081	0.0993792	-0.919212	-1.45249	61090	3
651	CAD	-1.84949	-1.84949	0.0206354	0.0993792	-0.95835	-1.39952	56339	2
652	NSL1	-1.95137	-1.95137	0.020671	0.0993979	-0.958308	-1.39946	56436	2
653	DDOST	-1.79393	-2.03335	0.020715	0.0994574	-0.919056	-1.45224	61407	3
654	RELA	-1.69422	-1.69422	0.0208413	0.0999109	-0.958123	-1.39919	56901	2
655	TFDP1	-1.90194	-1.90194	0.0209094	0.0999901	-0.958052	-1.39909	57087	2
656	PNO1	-1.92274	-1.92274	0.0209215	0.0999901	-0.958038	-1.39907	57120	2
657	SF3A1	-2.56675	-1.72697	0.0210132	0.100247	-0.918602	-1.45152	62291	3
662	SRP14	-2.61289	-3.36897	0.0211255	0.100247	-0.918432	-1.45125	62624	3
659	PRPF19	-2.49258	-2.49258	0.0211438	0.100247	-0.957768	-1.39867	57727	2
661	AQR	-2.57846	-3.15559	0.0211492	0.100247	-0.918395	-1.45119	62694	3
658	KARS	-2.07768	-2.27345	0.0211492	0.100247	-0.882429	-1.48254	66970	4
660	RFC3	-2.44531	-2.89271	0.0211667	0.100247	-0.918361	-1.45114	62746	3
663	TAF6	-2.40161	-2.40161	0.0212013	0.100259	-0.957697	-1.39857	57884	2
664	MATR3	-1.1013	-1.02535	0.0212704	0.100435	-0.882217	-1.48218	67354	4
665	IFI30	-1.61183	-1.61183	0.0213401	0.100613	-0.957541	-1.39834	58263	2
666	SOD1	-1.42805	-1.38128	0.0215449	0.101426	-0.917764	-1.4502	63867	3
667	SKA1	-1.4018	-1.39233	0.0216724	0.101873	-0.917594	-1.44993	64245	3
668	TIMM13	-1.65101	-1.65101	0.0217456	0.102064	-0.957073	-1.39766	59370	2
669	NOL7	-1.57711	-1.72773	0.0218648	0.102471	-0.881222	-1.48051	69236	4
670	SMARCB1	-2.09516	-1.52469	0.0219291	0.102581	-0.917211	-1.44932	65006	3
671	UTP6	-2.14059	-2.56198	0.0219537	0.102581	-0.917182	-1.44928	65079	3
673	MCM3AP	-1.73917	-1.41626	0.0220478	0.102711	-0.91704	-1.44906	65358	3
674	NAE1	-1.71991	-1.67546	0.0220527	0.102711	-0.880906	-1.47998	69831	4
672	ARGLU1	-1.27445	-1.21559	0.0220795	0.102711	-0.916998	-1.44899	65452	3
675	MED10	-1.67774	-1.43624	0.0221237	0.102764	-0.880783	-1.47977	70056	4
682	TAF5	-2.07719	-2.02078	0.022318	0.103065	-0.916643	-1.44843	66159	3
679	TBCB	-1.97777	-1.56613	0.0223321	0.103065	-0.880436	-1.47919	70716	4
676	AKIRIN2	-1.07158	-1.12045	0.0223385	0.103065	-0.880428	-1.47917	70736	4
683	GPN2	-1.88919	-2.09353	0.0223631	0.103065	-0.880394	-1.47912	70814	4
678	ZNHIT1	-1.19766	-1.20809	0.0224088	0.103065	-0.916501	-1.4482	66428	3
681	MED12	-2.03553	-1.97615	0.0224117	0.103065	-0.880317	-1.47899	70968	4
680	SRP68	-1.8051	-1.8051	0.0224492	0.103065	-0.956292	-1.39652	61291	2
677	RAD1	-1.32389	-1.12104	0.0224512	0.103065	-0.880258	-1.47889	71093	4
684	TRNT1	-2.10916	-2.10916	0.0226155	0.103668	-0.956122	-1.39627	61745	2
685	SPDL1	-2.24632	-2.24632	0.0226697	0.103765	-0.956065	-1.39619	61893	2
686	PRPF4	-1.60048	-1.72398	0.0228542	0.104457	-0.879605	-1.47779	72369	4
687	CTPS1	-1.15031	-1.00313	0.023019	0.105058	-0.879321	-1.47731	72891	4
688	SETD1A	-1.72777	-1.72777	0.0230568	0.105078	-0.955639	-1.39557	62950	2
689	AFG3L2	-1.4571	-1.48376	0.0231027	0.105134	-0.915479	-1.44659	68485	3
690	CCDC84	-1.44179	-1.52499	0.0231991	0.10542	-0.915337	-1.44636	68771	3
691	UTP3	-1.32143	-1.40345	0.0234808	0.106546	-0.91494	-1.44574	69606	3
692	RPTOR	-1.20428	-1.18873	0.0235776	0.106831	-0.914798	-1.44551	69893	3
693	CAMLG	-2.01331	-2.01331	0.0236319	0.106922	-0.955029	-1.39467	64520	2
694	DPY30	-1.40197	-1.49494	0.0237301	0.107212	-0.91457	-1.44515	70345	3
695	PSMC2	-1.87261	-1.68265	0.0238031	0.107388	-0.878043	-1.47517	75374	4
696	NDUFB1	-1.17785	-1.1705	0.02386	0.10749	-0.914372	-1.44484	70730	3
707	WDR43	-2.0225	-2.06243	0.0239329	0.107512	-0.87784	-1.47483	75785	4
705	PSMC1	-1.73939	-1.9482	0.0239807	0.107512	-0.914216	-1.44459	71088	3
710	GBF1	-2.16376	-2.20742	0.0239923	0.107512	-0.877749	-1.47467	75973	4
712	NAPA	-3.17404	-3.48037	0.0240121	0.107512	-0.914173	-1.44452	71181	3
706	VMP1	-1.99169	-1.99169	0.0241252	0.107512	-0.954504	-1.39391	65867	2
697	GTF2A1	-1.64679	-1.17635	0.0241504	0.107512	-0.913988	-1.44423	71591	3
703	GFRAL	-1.61283	-1.61283	0.0241699	0.107512	-0.954461	-1.39384	65989	2
709	WDR74	-2.05181	-2.1592	0.0242068	0.107512	-0.913917	-1.44412	71758	3
711	SDE2	-2.22051	-2.65243	0.0242176	0.107512	-0.913903	-1.4441	71790	3
699	DDX6	-1.82839	-1.21805	0.0242506	0.107512	-0.913846	-1.44401	71888	3
704	TTC27	-2.05114	-1.94064	0.024279	0.107512	-0.877308	-1.47393	76881	4
698	SNAP23	-1.38401	-1.20246	0.0243147	0.107512	-0.913761	-1.44387	72078	3
708	MON2	-1.83783	-2.08993	0.0243235	0.107512	-0.913747	-1.44385	72104	3
702	FNBP1L	-1.57453	-1.57453	0.0243512	0.107512	-0.954276	-1.39358	66484	2
700	HEYL	-1.34556	-1.43172	0.024392	0.107512	-0.913648	-1.44369	72307	3
701	C21orf59	-1.55251	-1.55251	0.0244127	0.107512	-0.954205	-1.39347	66652	2
713	RNF4	-1.67033	-1.32856	0.0244691	0.107609	-0.877007	-1.47343	77483	4
714	COASY	-1.18358	-1.15195	0.0245205	0.107684	-0.913463	-1.4434	72688	3
717	CEBPA	-1.7322	-1.824	0.0246144	0.107754	-0.876766	-1.47302	77943	4
718	MMGT1	-1.74868	-1.95831	0.0246615	0.107754	-0.913264	-1.44309	73106	3
719	NUP85	-2.07718	-2.09579	0.0246738	0.107754	-0.876675	-1.47287	78131	4
715	TARDBP	-1.61407	-1.12319	0.0246848	0.107754	-0.913236	-1.44304	73175	3
716	POP7	-1.73957	-1.73957	0.0247398	0.107754	-0.953851	-1.39295	67545	2
720	PSMD14	-2.3484	-2.16656	0.0247423	0.107754	-0.876567	-1.47269	78348	4
721	HSPA8	-1.48225	-1.43605	0.0247839	0.107786	-0.913108	-1.44284	73469	3
722	ACTR2	-1.23436	-1.16779	0.0248608	0.107837	-0.912995	-1.44266	73697	3
723	PPP1R12A	-1.60551	-1.60028	0.0248693	0.107837	-0.912981	-1.44264	73722	3
724	SUPT6H	-1.7526	-1.76695	0.0248986	0.107837	-0.876326	-1.47228	78843	4
725	POT1	-1.91447	-2.10206	0.0249968	0.108113	-0.876172	-1.47202	79154	4
726	SCAP	-2.00975	-2.21925	0.0250448	0.108172	-0.876092	-1.47189	79306	4
727	HACE1	-1.30926	-1.40533	0.0251398	0.108433	-0.912626	-1.44208	74524	3
729	WDR46	-2.22062	-2.31393	0.025204	0.108541	-0.875857	-1.47149	79810	4
728	LSM6	-2.0502	-1.56144	0.0252339	0.108541	-0.912484	-1.44185	74803	3
730	EIF6	-2.30923	-2.30923	0.0252863	0.108617	-0.953269	-1.3921	69037	2
732	DNM2	-1.95302	-2.00675	0.0253477	0.108708	-0.875616	-1.47109	80265	4
731	CCDC112	-1.63374	-1.63374	0.0253768	0.108708	-0.953169	-1.39196	69284	2
733	SART1	-1.28417	-1.32223	0.0254579	0.108907	-0.875445	-1.4708	80614	4
734	HNRNPH1	-1.6062	-1.6062	0.0255053	0.108961	-0.953041	-1.39177	69635	2
735	WNK1	-2.04308	-1.75251	0.0255662	0.108972	-0.875275	-1.47052	80957	4
736	ANO6	-1.81266	-1.81266	0.0255771	0.108972	-0.95297	-1.39167	69831	2
738	PDCD11	-1.78961	-2.11475	0.0257168	0.109353	-0.875028	-1.4701	81434	4
737	MTHFD1	-1.36482	-1.48466	0.0257362	0.109353	-0.911788	-1.44076	76292	3
740	CAPZB	-1.75883	-1.75883	0.0258393	0.109425	-0.952686	-1.39125	70547	2
741	RPL11	-2.16776	-2.24641	0.0258516	0.109425	-0.911632	-1.44051	76634	3
739	NT5C1A	-1.23904	-1.33776	0.0258577	0.109425	-0.874792	-1.46971	81880	4
745	IPMK	-2.29574	-2.29574	0.0259463	0.109449	-0.952573	-1.39109	70839	2
746	MVD	-2.24356	-2.51233	0.0260047	0.109449	-0.911425	-1.44018	77088	3
744	UBAP1	-1.41159	-1.25037	0.0260101	0.109449	-0.911419	-1.44017	77104	3
742	TRA2B	-1.50242	-0.940542	0.0260279	0.109449	-0.874537	-1.46928	82419	4
743	COLEC10	-1.19361	-1.13101	0.0260377	0.109449	-0.874523	-1.46925	82450	4
747	BAP1	-2.31193	-2.31193	0.0261825	0.109911	-0.952317	-1.39071	71484	2
748	MRPL35	-1.19985	-1.17853	0.0262652	0.11	-0.911022	-1.43954	77860	3
749	EIF3M	-1.54759	-1.4374	0.0262739	0.11	-0.874139	-1.46861	83198	4
751	CDC16	-2.30843	-2.37887	0.0263538	0.110104	-0.874019	-1.46841	83451	4
750	EFTUD1	-1.23476	-1.08451	0.026369	0.110104	-0.873997	-1.46837	83499	4
752	GCM1	-1.69257	-1.69257	0.0264049	0.110108	-0.952104	-1.3904	72091	2
753	SACM1L	-1.98387	-2.33099	0.0265379	0.110516	-0.873759	-1.46797	84034	4
754	ARNTL2	-1.54804	-1.54804	0.0266144	0.110608	-0.951892	-1.39009	72663	2
755	HMGN3	-1.7054	-1.7054	0.0266305	0.110608	-0.951877	-1.39007	72707	2
756	USP5	-2.19034	-2.31928	0.0267391	0.110913	-0.910397	-1.43856	79265	3
757	CHEK1	-2.12353	-2.45256	0.0268501	0.111226	-0.910241	-1.43831	79594	3
758	PSMC5	-2.33127	-2.40316	0.0269188	0.111364	-0.87319	-1.46701	85240	4
761	UROD	-2.37092	-2.43963	0.0270103	0.111452	-0.910014	-1.43795	80069	3
759	NACA	-1.34381	-1.38974	0.0270211	0.111452	-0.909999	-1.43793	80101	3
760	UBR5	-1.80962	-1.80962	0.0270466	0.111452	-0.951437	-1.38943	73843	2
762	ACSL4	-1.88441	-2.15198	0.0273501	0.112555	-0.872536	-1.46591	86606	4
763	OIP5	-2.19241	-2.19241	0.0274359	0.11276	-0.951054	-1.38887	74906	2
766	MED7	-2.12164	-2.12164	0.0275696	0.113092	-0.950926	-1.38868	75271	2
764	ASXL2	-1.62428	-1.62428	0.0276106	0.113092	-0.950884	-1.38862	75383	2
765	TIPIN	-1.63916	-1.63236	0.0276246	0.113092	-0.90919	-1.43665	81890	3
768	ZNF131	-1.75769	-1.75769	0.027711	0.11326	-0.95077	-1.38845	75657	2
767	NIPBL	-1.70703	-1.6995	0.0277379	0.11326	-0.871967	-1.46496	87834	4
769	COG2	-1.03004	-0.96773	0.0279135	0.113534	-0.871726	-1.46455	88390	4
770	DDX49	-1.63055	-1.53974	0.0279279	0.113534	-0.908779	-1.436	82789	3
772	RNF40	-2.14727	-2.06211	0.0279363	0.113534	-0.908764	-1.43598	82814	3
771	COPS4	-1.77947	-1.72034	0.0279495	0.113534	-0.871669	-1.46446	88504	4
773	ENAH	-1.49976	-1.49976	0.0280054	0.113614	-0.950472	-1.38802	76461	2
774	ACTB	-1.87614	-1.87614	0.0281157	0.113914	-0.950358	-1.38785	76762	2
776	TUBG1	-2.33009	-2.42366	0.0283141	0.114447	-0.908288	-1.43522	83934	3
775	CUL3	-2.30581	-1.95357	0.0283202	0.114447	-0.908282	-1.43522	83952	3
777	IK	-1.6831	-1.6831	0.0283626	0.114471	-0.950117	-1.3875	77436	2
779	EFTUD2	-1.74648	-1.38335	0.0285395	0.114973	-0.907998	-1.43477	84602	3
778	PELP1	-1.19101	-1.24461	0.0285601	0.114973	-0.907969	-1.43472	84663	3
780	MTBP	-1.65253	-1.81835	0.0287078	0.115419	-0.907785	-1.43443	85101	3
781	KCTD6	-1.48323	-1.48323	0.0288248	0.115741	-0.949634	-1.3868	78698	2
782	CERS2	-1.63624	-1.82357	0.028955	0.116005	-0.870221	-1.46203	91688	4
783	SYS1	-1.78474	-1.85155	0.0289642	0.116005	-0.907458	-1.43391	85861	3
784	OTOP1	-1.8992	-1.8992	0.0291401	0.116502	-0.949308	-1.38632	79559	2
785	RAD21	-2.34792	-2.67248	0.0291625	0.116502	-0.907189	-1.43349	86449	3
786	TMEM59	-1.60789	-1.60789	0.0292555	0.116691	-0.949194	-1.38615	79874	2
787	GPS1	-2.11499	-2.5149	0.0292843	0.116691	-0.907033	-1.43324	86810	3
788	HUS1	-2.18166	-2.18166	0.0293225	0.116696	-0.949123	-1.38605	80057	2
789	RPS9	-2.24251	-1.67957	0.0294425	0.117025	-0.906805	-1.43288	87279	3
791	TTI1	-1.32859	-1.13457	0.0295626	0.117151	-0.869355	-1.46057	93612	4
790	TNFAIP3	-1.02328	-0.960917	0.0295699	0.117151	-0.869341	-1.46055	93635	4
792	ARL2	-1.98938	-2.13542	0.0295862	0.117151	-0.906635	-1.43261	87705	3
793	UBE2M	-2.03067	-1.53102	0.0296431	0.117229	-0.869242	-1.46038	93867	4
794	EMR3	-1.30444	-1.35421	0.0297707	0.117585	-0.906394	-1.43223	88252	3
796	GINS1	-1.57266	-1.14085	0.0299532	0.117901	-0.906152	-1.43185	88793	3
799	IARS	-1.72583	-1.92748	0.0300091	0.117901	-0.868745	-1.45955	95026	4
795	ESPN	-1.07377	-1.05292	0.0300187	0.117901	-0.906067	-1.43172	88987	3
797	PUF60	-1.64043	-1.24969	0.030029	0.117901	-0.868717	-1.4595	95089	4
798	DDB1	-1.91139	-1.6354	0.0300385	0.117901	-0.868702	-1.45947	95119	4
800	CCDC30	-1.85388	-2.24158	0.0300932	0.117919	-0.905968	-1.43156	89208	3
801	VPS28	-2.20523	-2.74164	0.0301182	0.117919	-0.905939	-1.43151	89282	3
802	FAM204A	-1.39201	-1.40862	0.0301971	0.118081	-0.90584	-1.43136	89516	3
803	PGGT1B	-1.49477	-1.49477	0.0304371	0.118871	-0.948016	-1.38443	83100	2
804	HARS	-1.45524	-1.50557	0.0304815	0.118897	-0.905485	-1.4308	90359	3
806	GTPBP4	-1.58295	-1.58295	0.0305591	0.118933	-0.947888	-1.38425	83433	2
808	RRS1	-1.84867	-1.84867	0.030584	0.118933	-0.94786	-1.38421	83501	2
809	SKIV2L2	-2.58914	-2.60814	0.0306366	0.118933	-0.867907	-1.45814	97013	4
807	HMGCR	-2.20706	-1.81242	0.0306623	0.118933	-0.905272	-1.43046	90895	3
805	NUP88	-1.76613	-1.56233	0.0306802	0.118933	-0.867836	-1.45802	97151	4
810	RFC2	-1.75949	-1.24856	0.0307879	0.119077	-0.867694	-1.45778	97492	4
811	EAPP	-1.62897	-1.62897	0.0307931	0.119077	-0.947661	-1.38391	84072	2
812	CENPM	-2.15656	-1.79797	0.0308647	0.119156	-0.905017	-1.43006	91495	3
813	SSRP1	-2.00636	-2.14755	0.0308896	0.119156	-0.867564	-1.45756	97814	4
814	DHX16	-1.57954	-1.57954	0.0310586	0.119661	-0.947392	-1.38352	84797	2
815	PRPF38A	-2.52418	-2.29521	0.0311015	0.11968	-0.86728	-1.45708	98485	4
816	ATP5C1	-1.60717	-1.60717	0.0311802	0.119836	-0.947278	-1.38336	85129	2
820	CTDNEP1	-2.25542	-2.23747	0.0312404	0.119892	-0.867098	-1.45678	98925	4
818	DYNLRB1	-2.02773	-1.44229	0.031313	0.119892	-0.904477	-1.4292	92824	3
819	ALDOA	-1.87337	-2.13505	0.0313143	0.119892	-0.867009	-1.45663	99159	4
817	C16orf72	-1.10107	-1.06958	0.0313474	0.119892	-0.904435	-1.42914	92926	3
821	CFDP1	-2.44984	-2.66588	0.0314459	0.120122	-0.904293	-1.42891	93218	3
822	UGCG	-1.58348	-1.64179	0.0316071	0.120591	-0.86663	-1.45599	100086	4
823	CD55	-1.51527	-1.51527	0.0317487	0.120984	-0.946724	-1.38255	86681	2
824	CRLS1	-1.75728	-1.75728	0.0318003	0.121034	-0.946668	-1.38246	86822	2
825	CWF19L2	-1.26647	-1.04832	0.0318491	0.121073	-0.90381	-1.42815	94413	3
826	SNAPC1	-1.33227	-1.18926	0.0319361	0.121257	-0.903697	-1.42797	94671	3
828	NLE1	-1.8935	-1.61092	0.0320321	0.121352	-0.866048	-1.45501	101432	4
827	RAB3GAP2	-1.56594	-1.56594	0.0320384	0.121352	-0.946455	-1.38215	87472	2
829	ZNF214	-1.48028	-1.48028	0.0321201	0.121515	-0.94637	-1.38203	87695	2
833	ANKLE2	-1.92954	-1.85167	0.0324839	0.122711	-0.903058	-1.42696	96295	3
832	ATL2	-1.70571	-1.70521	0.0325767	0.122711	-0.902944	-1.42678	96570	3
830	MTOR	-1.45517	-1.40045	0.0325882	0.122711	-0.90293	-1.42676	96604	3
831	ZDHHC23	-1.59357	-1.59357	0.0326259	0.122711	-0.945887	-1.38132	89076	2
834	RPS23	-2.75409	-3.53531	0.0326317	0.122711	-0.902887	-1.42669	96733	3
835	CINP	-1.07488	-1.0814	0.0326823	0.122754	-0.902831	-1.4266	96883	3
836	EIF3I	-1.69796	-1.4466	0.0327815	0.122979	-0.902703	-1.4264	97177	3
838	KNTC1	-1.43658	-1.43482	0.0329673	0.123431	-0.902476	-1.42604	97728	3
840	IREB2	-1.60023	-1.60023	0.0330237	0.123431	-0.945504	-1.38076	90162	2
837	PPHLN1	-1.12717	-1.07164	0.0330776	0.123431	-0.902334	-1.42582	98055	3
841	SNRPD3	-2.29578	-2.88132	0.033084	0.123431	-0.902329	-1.42581	98074	3
839	ABCE1	-1.95043	-1.53928	0.0330983	0.123431	-0.864628	-1.45263	104808	4
842	SRRT	-1.45323	-1.45323	0.0331632	0.123526	-0.945376	-1.38058	90543	2
844	HEATR1	-1.57207	-1.50636	0.0332309	0.123581	-0.864458	-1.45234	105228	4
843	TUBGCP3	-1.19814	-1.28599	0.0332568	0.123581	-0.902107	-1.42546	98586	3
845	ZMAT2	-1.72406	-1.72406	0.0333017	0.123602	-0.945234	-1.38037	90921	2
846	POLR2K	-2.14008	-2.14008	0.0334701	0.124081	-0.945092	-1.38016	91381	2
848	MED27	-1.64782	-1.53962	0.0336282	0.124472	-0.901667	-1.42476	99687	3
849	HCFC1	-2.36818	-2.79993	0.0336693	0.124472	-0.901624	-1.42469	99809	3
847	SDAD1	-1.83015	-1.05634	0.0336946	0.124472	-0.901596	-1.42465	99884	3
850	UTP11L	-2.09859	-2.47262	0.0337682	0.124597	-0.90151	-1.42452	100102	3
851	URB2	-1.343	-1.01777	0.0338407	0.124718	-0.901425	-1.42438	100317	3
852	EIF1AD	-1.05847	-0.90512	0.0339282	0.124894	-0.863549	-1.45082	107436	4
853	PTBP1	-1.50251	-1.41336	0.0340419	0.125166	-0.863407	-1.45058	107796	4
855	RPS29	-1.64711	-1.64711	0.0341745	0.125474	-0.944411	-1.37917	93304	2
854	DNAJA3	-1.40734	-1.40734	0.0342056	0.125474	-0.944382	-1.37913	93389	2
856	TRAF2	-1.15172	-1.05776	0.034258	0.125501	-0.900928	-1.4236	101554	3
857	PSMG2	-1.76425	-1.11122	0.034293	0.125501	-0.900886	-1.42353	101658	3
858	ZC3H11A	-1.92916	-1.92916	0.0343635	0.125613	-0.944226	-1.3789	93820	2
859	RCL1	-1.76886	-1.87589	0.0344906	0.125931	-0.862868	-1.44967	109217	4
860	XRCC5	-1.8775	-1.78496	0.0346172	0.126246	-0.900517	-1.42295	102619	3
863	SETDB1	-1.90018	-1.74619	0.0347565	0.126346	-0.86256	-1.44916	110059	4
861	CIAO1	-1.3021	-1.19868	0.0347663	0.126346	-0.900346	-1.42268	103061	3
862	HIVEP3	-1.41818	-1.41818	0.0348	0.126346	-0.943843	-1.37834	95012	2
864	ZBTB11	-1.69052	-1.84693	0.0348421	0.126346	-0.862448	-1.44897	110330	4
865	BORA	-1.95964	-1.95964	0.0348458	0.126346	-0.9438	-1.37828	95137	2
866	COG4	-1.46695	-1.28371	0.0349239	0.126483	-0.900162	-1.42238	103528	3
868	GMPS	-1.84179	-2.01321	0.0350047	0.126582	-0.862257	-1.44865	110845	4
867	FLII	-1.69505	-1.94322	0.0350318	0.126582	-0.900034	-1.42218	103848	3
869	WDR24	-1.29277	-1.09258	0.035073	0.126585	-0.899991	-1.42212	103970	3
870	EPC2	-1.27251	-1.37936	0.0351212	0.126614	-0.899935	-1.42203	104113	3
872	WDR3	-1.59653	-1.59653	0.0352073	0.126776	-0.943459	-1.37778	96124	2
871	TSPAN2	-1.49835	-1.49835	0.0352469	0.126776	-0.943431	-1.37774	96232	2
878	ZNF207	-2.1891	-1.86753	0.0353398	0.126919	-0.899679	-1.42162	104761	3
880	PSMB3	-2.39605	-2.15847	0.0354241	0.126919	-0.861746	-1.44779	112173	4
881	KDM1A	-2.2245	-2.2245	0.0354732	0.126919	-0.943218	-1.37743	96850	2
873	TUT1	-1.42665	-1.22735	0.0354801	0.126919	-0.899509	-1.42135	105177	3
879	SLMO2	-1.97708	-1.96869	0.0354942	0.126919	-0.861661	-1.44764	112395	4
875	CAB39	-1.435	-1.60276	0.0355412	0.126919	-0.899438	-1.42124	105358	3
877	RFC1	-1.65631	-1.65631	0.035571	0.126919	-0.943133	-1.3773	97117	2
876	TBCC	-1.94412	-1.62808	0.0356445	0.126919	-0.861471	-1.44733	112871	4
874	XRN2	-1.69089	-1.47565	0.0356505	0.126919	-0.861462	-1.44731	112890	4
882	ACO2	-3.08063	-3.9639	0.0357298	0.127057	-0.89922	-1.4209	105917	3
883	CEPT1	-1.77227	-1.89143	0.0358154	0.127217	-0.861263	-1.44698	113412	4
885	NAA20	-2.88771	-3.41475	0.0360894	0.128018	-0.898813	-1.42025	106983	3
884	C3orf17	-1.71141	-1.87068	0.0361223	0.128018	-0.860895	-1.44636	114384	4
886	NAA50	-1.92935	-2.06181	0.0361792	0.128075	-0.860824	-1.44624	114564	4
888	C9orf114	-1.18618	-1.25536	0.0363407	0.128415	-0.898529	-1.4198	107728	3
890	DNAJC11	-1.42342	-1.42342	0.0364105	0.128415	-0.942366	-1.37618	99409	2
891	DDX21	-1.89297	-1.89297	0.0364541	0.128415	-0.942324	-1.37612	99528	2
889	WDR12	-1.39979	-1.30022	0.036464	0.128415	-0.860497	-1.44569	115466	4
887	CDH18	-1.15913	-1.05936	0.0364796	0.128415	-0.898373	-1.41956	108140	3
894	DLEC1	-1.44507	-1.44507	0.0365402	0.128468	-0.942253	-1.37602	99763	2
893	PABPN1	-1.43948	-1.43948	0.036601	0.128468	-0.942196	-1.37593	99929	2
892	PRPF31	-1.31922	-1.42179	0.0366175	0.128468	-0.860298	-1.44536	115952	4
895	CDT1	-1.80372	-1.50985	0.0368006	0.128967	-0.860095	-1.44501	116532	4
902	MAPRE1	-2.10793	-2.10793	0.0369368	0.129016	-0.941884	-1.37548	100846	2
900	KAT5	-1.75027	-1.75027	0.0369881	0.129016	-0.941841	-1.37542	100986	2
897	CTCF	-1.59562	-1.3973	0.0369936	0.129016	-0.859844	-1.44459	117143	4
898	GAR1	-1.45702	-1.45702	0.0370031	0.129016	-0.941827	-1.37539	101027	2
901	PCBP1	-1.63806	-1.84411	0.0370239	0.129016	-0.859802	-1.44452	117239	4
903	RPS15A	-2.22152	-2.22152	0.0370958	0.129016	-0.941742	-1.37527	101280	2
896	EIF3J	-1.17187	-1.09352	0.0371182	0.129016	-0.897649	-1.41841	110033	3
899	RRP12	-1.46728	-1.46728	0.0371434	0.129016	-0.941699	-1.37521	101410	2
904	COG8	-1.37475	-1.4215	0.0371963	0.129057	-0.859589	-1.44416	117785	4
905	RSPO3	-1.57019	-1.57019	0.0374701	0.129863	-0.941401	-1.37477	102302	2
906	FAM102B	-1.21168	-0.977549	0.0375728	0.130076	-0.859149	-1.44342	118977	4
907	PRPF40A	-1.47585	-1.57721	0.0376947	0.130354	-0.89701	-1.4174	111742	3
909	WDR36	-1.49249	-1.49249	0.0377708	0.130447	-0.941117	-1.37436	103123	2
908	PI4KB	-1.38792	-1.08618	0.0378054	0.130447	-0.896883	-1.4172	112070	3
910	OR7G1	-1.55804	-1.55804	0.0378463	0.130447	-0.941046	-1.37425	103329	2
911	MEPCE	-1.56111	-1.10164	0.0379622	0.130703	-0.896712	-1.41693	112535	3
912	CLSPN	-1.47126	-1.47126	0.0380393	0.130825	-0.940876	-1.37401	103856	2
913	GTF2A2	-1.14489	-1.17283	0.0381283	0.130988	-0.858496	-1.44233	120736	4
915	CHMP2A	-2.16086	-1.38477	0.0383195	0.131412	-0.896315	-1.41631	113594	3
914	LRRC9	-1.37564	-1.37564	0.0383356	0.131412	-0.94062	-1.37363	104665	2
918	RPL7A	-1.64974	-1.8605	0.0384321	0.13146	-0.896187	-1.4161	113928	3
917	CDC40	-1.57567	-1.57567	0.0384367	0.13146	-0.940535	-1.37351	104941	2
916	CTNNBL1	-1.32641	-1.43719	0.038475	0.13146	-0.896144	-1.41604	114055	3
919	MED31	-1.9087	-1.33459	0.0385219	0.131477	-0.896088	-1.41595	114194	3
920	NUP50	-1.02437	-1.0746	0.0385694	0.131496	-0.857984	-1.44147	122133	4
921	NUBP1	-1.3822	-1.3822	0.0386246	0.131541	-0.940365	-1.37326	105454	2
922	NVL	-1.6922	-1.7079	0.0388041	0.132009	-0.857715	-1.44101	122876	4
923	POLR3E	-1.2926	-1.18904	0.0388943	0.132173	-0.895662	-1.41527	115298	3
924	ERCC2	-1.22429	-1.0472	0.0389678	0.13228	-0.895577	-1.41514	115516	3
925	GTF2E2	-1.40813	-1.40813	0.0391015	0.13259	-0.939953	-1.37266	106756	2
927	IPO13	-1.27563	-1.28845	0.0392455	0.132841	-0.85719	-1.44013	124274	4
928	SNRNP48	-1.35324	-1.35324	0.0393326	0.132841	-0.93974	-1.37235	107387	2
926	GAPDH	-1.6586	-1.28315	0.0393362	0.132841	-0.85709	-1.43997	124561	4
929	CENPH	-1.4555	-1.4555	0.0393461	0.132841	-0.939726	-1.37233	107424	2
930	KIN	-2.55833	-2.79037	0.0393868	0.132841	-0.895122	-1.41442	116758	3
931	BRD4	-1.43044	-1.43044	0.0395725	0.133324	-0.939541	-1.37206	108042	2
932	NOL6	-1.69095	-1.69095	0.0396831	0.133553	-0.939442	-1.37191	108344	2
933	NUDCD3	-1.88679	-1.42135	0.0397915	0.133775	-0.856579	-1.43911	126003	4
934	SPINK4	-1.39809	-1.39809	0.0399219	0.13398	-0.939215	-1.37158	108996	2
935	BMS1	-1.47877	-1.41182	0.0399381	0.13398	-0.856409	-1.43882	126467	4
936	SBDS	-2.02461	-1.96077	0.0400843	0.134327	-0.856238	-1.43853	126930	4
937	PCYT2	-1.07164	-1.12136	0.0402895	0.134871	-0.894185	-1.41294	119434	3
938	IPO11	-0.992598	-0.991843	0.0403772	0.135021	-0.894086	-1.41278	119694	3
939	AGBL2	-1.22805	-1.16362	0.0404595	0.135152	-0.893987	-1.41263	119938	3
940	FSIP1	-1.35041	-1.35041	0.0405442	0.135291	-0.938661	-1.37077	110695	2
941	POLR3K	-1.90937	-1.90937	0.0406552	0.135517	-0.938562	-1.37063	110998	2
943	PPFIA1	-1.41186	-1.41186	0.0407651	0.135599	-0.938477	-1.3705	111298	2
942	CACTIN	-1.40872	-1.1231	0.0407662	0.135599	-0.893632	-1.41207	120847	3
944	MED17	-1.46578	-1.57144	0.0409287	0.135996	-0.855259	-1.43689	129604	4
951	DYNC1H1	-2.31973	-2.78269	0.0410077	0.136005	-0.89339	-1.41168	121563	3
945	RBBP8	-1.08001	-0.947358	0.0410254	0.136005	-0.855145	-1.4367	129910	4
950	WAC	-1.60669	-1.65705	0.0410816	0.136005	-0.855075	-1.43658	130088	4
948	MSTO1	-1.3026	-1.32581	0.0411821	0.136005	-0.893192	-1.41137	122080	3
946	ALG14	-1.65711	-1.03785	0.0412189	0.136005	-0.893149	-1.4113	122189	3
949	RAB2A	-1.35007	-1.35007	0.0412233	0.136005	-0.938094	-1.36994	112549	2
947	XPR1	-1.22361	-1.13407	0.0412347	0.136005	-0.893135	-1.41128	122236	3
952	RAF1	-1.66708	-1.75173	0.0413806	0.136343	-0.854728	-1.436	131035	4
953	RPN1	-1.56547	-1.85633	0.0416402	0.137055	-0.892723	-1.41063	123438	3
954	POLR1A	-2.0448	-1.34364	0.0418379	0.137561	-0.89251	-1.41029	124024	3
955	SRRM1	-1.31602	-1.20856	0.0419458	0.137639	-0.892397	-1.41011	124344	3
956	DLST	-1.20449	-1.274	0.0419491	0.137639	-0.854137	-1.435	132835	4
957	MYCL	-1.89844	-1.86005	0.0420436	0.137805	-0.892297	-1.40996	124634	3
958	NOP9	-1.2268	-1.29514	0.0422784	0.13843	-0.892056	-1.40958	125330	3
960	KIAA0100	-1.96438	-1.57609	0.0424423	0.13876	-0.853591	-1.43409	134397	4
959	RAB18	-1.59508	-1.55757	0.0424677	0.13876	-0.891857	-1.40926	125891	3
961	SLTM	-1.41989	-1.41989	0.0425444	0.138828	-0.936958	-1.36828	116156	2
962	ATIC	-1.49604	-1.49604	0.042577	0.138828	-0.93693	-1.36824	116245	2
963	DARS	-1.63251	-1.47141	0.042676	0.139007	-0.853328	-1.43364	135137	4
964	NUP43	-1.61997	-1.46319	0.0427379	0.139064	-0.891588	-1.40884	126692	3
966	NDE1	-1.22299	-1.08525	0.0428684	0.139262	-0.89146	-1.40863	127079	3
969	DDX54	-2.02164	-2.02164	0.0429623	0.139262	-0.936589	-1.36775	117297	2
967	DGCR8	-1.27695	-1.21157	0.0429885	0.139262	-0.891332	-1.40843	127435	3
965	KCNIP4	-0.837726	-0.809063	0.0430035	0.139262	-0.852973	-1.43305	136174	4
968	LUZP4	-1.33863	-1.33863	0.0430205	0.139262	-0.936546	-1.36768	117456	2
971	CDH19	-1.38068	-1.38068	0.0431029	0.139293	-0.936475	-1.36758	117681	2
970	STAM2	-1.37645	-1.37645	0.0431359	0.139293	-0.936447	-1.36754	117771	2
972	ARCN1	-1.5489	-1.49854	0.0431769	0.139293	-0.852777	-1.43272	136723	4
973	DDX60L	-1.78314	-1.78314	0.0432073	0.139293	-0.93639	-1.36745	117966	2
974	GARS	-2.03354	-2.03354	0.0433623	0.139649	-0.936262	-1.36727	118389	2
975	TSR1	-2.06127	-2.34166	0.0434092	0.139657	-0.890892	-1.40774	128682	3
976	TSG101	-1.43984	-1.43984	0.043504	0.139818	-0.936135	-1.36708	118776	2
977	SLC15A2	-1.08252	-0.956044	0.0435718	0.139893	-0.890736	-1.40749	129164	3
978	SLC33A1	-1.16858	-0.998311	0.0436203	0.139906	-0.890679	-1.4074	129308	3
979	DCAF13	-1.22596	-0.949127	0.043816	0.14039	-0.89048	-1.40709	129888	3
980	IPO7	-1.48078	-1.48078	0.0439322	0.140619	-0.935765	-1.36654	119945	2
982	PPP2CA	-1.4669	-1.67942	0.0441729	0.14115	-0.890125	-1.40653	130946	3
981	ZNFX1	-1.30024	-1.30024	0.0441882	0.14115	-0.935553	-1.36623	120644	2
983	ESCO2	-1.27851	-1.35865	0.0443055	0.141381	-0.889984	-1.4063	131339	3
984	ELAC2	-0.958608	-0.963407	0.0443942	0.141495	-0.889898	-1.40617	131602	3
985	TSC1	-1.3993	-1.3993	0.0444314	0.141495	-0.93534	-1.36592	121308	2
988	SAT1	-1.4565	-1.4565	0.0445017	0.141548	-0.935283	-1.36584	121500	2
989	FAM50A	-1.5975	-1.6996	0.0445995	0.141548	-0.851213	-1.43009	141228	4
987	FEZF1	-1.38003	-1.38003	0.0446076	0.141548	-0.935198	-1.36571	121789	2
986	PSMG4	-1.59781	-1.32994	0.0446283	0.141548	-0.889643	-1.40576	132296	3
992	ASPM	-1.31135	-1.26628	0.0449447	0.142351	-0.850858	-1.42949	142321	4
991	SKP1	-1.30764	-1.17248	0.0450058	0.142351	-0.88926	-1.40516	133415	3
990	SPEN	-1.03531	-1.05398	0.0450172	0.142351	-0.889245	-1.40513	133449	3
994	PSMD8	-1.17368	-1.16822	0.0450668	0.142359	-0.889203	-1.40507	133596	3
995	ASB17	-1.32699	-1.32699	0.045113	0.142359	-0.934772	-1.36509	123169	2
993	GTF3C3	-0.885769	-0.869429	0.045156	0.142359	-0.850631	-1.42911	142990	4
997	MZT1	-1.59165	-1.59165	0.0452672	0.142489	-0.93463	-1.36488	123590	2
996	TOMM7	-1.07284	-1.03206	0.0452878	0.142489	-0.888976	-1.40471	134251	3
999	PYGO1	-1.45543	-1.45543	0.0454412	0.142732	-0.934488	-1.36468	124065	2
998	RPL28	-1.12101	-0.991021	0.045456	0.142732	-0.850319	-1.42859	143940	4
1000	FAU	-2.02392	-2.29659	0.0455469	0.142874	-0.88872	-1.4043	135019	3
1001	RAG2	-1.31521	-1.31521	0.0456825	0.142905	-0.934275	-1.36437	124724	2
1002	MBOAT4	-1.34477	-1.34477	0.045717	0.142905	-0.934247	-1.36432	124818	2
1003	C20orf196	-1.40495	-1.40495	0.0457368	0.142905	-0.934232	-1.3643	124872	2
1004	GPKOW	-2.1897	-2.81442	0.0457388	0.142905	-0.888535	-1.40401	135588	3
1005	GPX7	-1.3212	-1.3212	0.0458891	0.143232	-0.934105	-1.36412	125288	2
1006	MMS19	-1.5363	-1.5363	0.0459778	0.143249	-0.934034	-1.36401	125530	2
1007	RBM22	-1.61876	-1.95432	0.0459857	0.143249	-0.888294	-1.40363	136320	3
1008	FAM166A	-1.74135	-1.74135	0.0460715	0.143374	-0.933948	-1.36389	125786	2
1010	ESF1	-1.56739	-1.66272	0.0463083	0.143912	-0.84941	-1.42706	146639	4
1009	YBX1	-1.22991	-1.26988	0.0463359	0.143912	-0.887925	-1.40305	137358	3
1011	PSMB6	-1.24581	-1.23786	0.0464283	0.144056	-0.88784	-1.40291	137632	3
1013	KCTD10	-1.78875	-1.78875	0.0466191	0.144481	-0.933508	-1.36325	127281	2
1012	ZNF830	-1.66627	-1.72646	0.0466574	0.144481	-0.887599	-1.40253	138311	3
1014	NUF2	-1.90424	-2.17985	0.0467036	0.144482	-0.887556	-1.40247	138448	3
1015	RBBP6	-1.7044	-1.64075	0.0471121	0.145602	-0.887144	-1.40182	139659	3
1016	RIMKLA	-0.966851	-0.947557	0.0471752	0.145654	-0.887088	-1.40173	139846	3
1017	UQCRFS1	-1.67048	-1.67048	0.0473926	0.146182	-0.932855	-1.36229	129393	2
1018	UROS	-1.33324	-1.33324	0.0474871	0.146329	-0.932784	-1.36219	129651	2
1019	OR14A16	-1.32711	-1.32711	0.0475534	0.14639	-0.932728	-1.36211	129832	2
1020	KAT8	-2.39613	-2.84589	0.0477847	0.146958	-0.886477	-1.40076	141653	3
1021	EDN2	-1.32236	-1.32409	0.0478914	0.147142	-0.847721	-1.42422	151652	4
1022	CENPL	-1.35847	-1.35847	0.048042	0.14746	-0.932316	-1.36151	131166	2
1024	XRN1	-2.21729	-2.80672	0.0484871	0.148551	-0.885796	-1.39968	143735	3
1023	NAT10	-0.940131	-0.980436	0.048492	0.148551	-0.847125	-1.42322	153554	4
1025	MED25	-1.11363	-1.20444	0.0485734	0.148655	-0.885711	-1.39955	143991	3
1027	RNF175	-1.53334	-1.53334	0.0487306	0.148891	-0.931762	-1.3607	133046	2
1026	SLC2A5	-1.26713	-1.26713	0.0487453	0.148891	-0.931748	-1.36068	133086	2
1028	INHBA	-1.37563	-1.37563	0.0488486	0.149062	-0.931663	-1.36055	133368	2
1029	DPAGT1	-1.25634	-1.07543	0.0489239	0.149147	-0.88537	-1.39901	145030	3
1030	CYLD	-1.12054	-1.2056	0.0491263	0.149618	-0.885185	-1.39872	145630	3
1031	GNS	-1.40041	-1.40041	0.0491753	0.149622	-0.931393	-1.36016	134260	2
1033	RPS25	-1.43519	-1.43519	0.0492481	0.149681	-0.931337	-1.36007	134459	2
1032	FOXO6	-1.00691	-0.996813	0.0492899	0.149681	-0.885029	-1.39847	146115	3
1034	PLP2	-1.47806	-1.47806	0.0494218	0.149937	-0.931195	-1.35987	134933	2
1035	ADSL	-1.88652	-2.03964	0.0495132	0.150069	-0.884816	-1.39814	146777	3
1036	DDX10	-1.88039	-1.99321	0.0495837	0.150138	-0.884745	-1.39802	146986	3
1037	LSM4	-1.26696	-1.11953	0.0497861	0.150592	-0.884547	-1.39771	147586	3
1038	UBE2I	-2.33209	-2.71187	0.0498296	0.150592	-0.884504	-1.39764	147715	3
1041	OSGEPL1	-1.34458	-1.34458	0.0499605	0.1507	-0.930754	-1.35922	136404	2
1040	ZC3H13	-1.33963	-1.33963	0.0499803	0.1507	-0.93074	-1.3592	136458	2
1039	FOXJ3	-1.62566	-1.02642	0.0500094	0.1507	-0.845606	-1.42067	158359	4
1043	DSN1	-1.86152	-2.14171	0.0501913	0.151017	-0.884163	-1.3971	148787	3
1042	PSMD13	-1.64473	-1.67498	0.0502106	0.151017	-0.845407	-1.42034	158996	4
1044	COPS5	-2.04648	-2.2588	0.0502608	0.151023	-0.884092	-1.39699	148993	3
1045	RNASEK	-2.03908	-1.13462	0.0503636	0.151187	-0.883993	-1.39684	149298	3
1046	SET	-1.30619	-1.30619	0.050433	0.151251	-0.930357	-1.35864	137694	2
1047	HSF5	-1.30428	-1.30428	0.0507352	0.152012	-0.930116	-1.35829	138519	2
1048	ENO1	-1.16731	-1.15015	0.0508952	0.152346	-0.844711	-1.41917	161164	4
1049	DHX9	-1.29737	-0.899444	0.0509922	0.152491	-0.844612	-1.419	161471	4
1052	NSMCE4A	-1.86148	-2.11662	0.051099	0.15265	-0.883303	-1.39575	151478	3
1051	MEF2D	-1.34774	-1.23901	0.0512276	0.15265	-0.883184	-1.39556	151859	3
1053	SNRNP200	-2.46674	-2.34144	0.0512347	0.15265	-0.844364	-1.41858	162239	4
1050	NUP54	-1.25609	-1.03436	0.0512397	0.15265	-0.88317	-1.39553	151895	3
1054	RPRD2	-0.868507	-0.795219	0.0513014	0.152688	-0.8443	-1.41848	162450	4
1057	IL23R	-1.39548	-1.39548	0.0514007	0.152688	-0.92959	-1.35753	140336	2
1055	BLM	-1.34273	-1.15072	0.0514157	0.152688	-0.844186	-1.41829	162812	4
1058	NOL12	-1.32869	-1.50968	0.0514583	0.152688	-0.882957	-1.3952	152543	3
1056	SRP72	-1.36123	-1.18251	0.0514957	0.152688	-0.882914	-1.39513	152654	3
1059	KCNQ3	-1.29973	-1.29973	0.051701	0.153152	-0.929363	-1.35719	141156	2
1069	MAD2L1BP	-1.39428	-1.39428	0.0518413	0.153377	-0.92925	-1.35703	141539	2
1063	DPH5	-1.07164	-1.0148	0.0520065	0.153377	-0.882446	-1.39439	154168	3
1064	UXT	-1.62169	-1.10207	0.0520183	0.153377	-0.882431	-1.39437	154203	3
1061	INTS3	-1.02678	-0.974862	0.0520503	0.153377	-0.882403	-1.39432	154298	3
1071	TSR2	-2.1901	-2.64667	0.0520952	0.153377	-0.88236	-1.39426	154431	3
1062	NFYB	-1.17607	-0.981903	0.0521094	0.153377	-0.882346	-1.39423	154473	3
1066	PPP2R2A	-1.38099	-1.33331	0.0521397	0.153377	-0.882318	-1.39419	154563	3
1070	PDS5A	-1.26219	-1.44191	0.0522345	0.153377	-0.882233	-1.39405	154844	3
1068	LIN52	-1.93354	-1.36313	0.0522922	0.153377	-0.882176	-1.39396	155015	3
1060	RQCD1	-0.903363	-0.850859	0.0523274	0.153377	-0.843278	-1.41676	165699	4
1067	RRP7A	-1.45482	-1.3399	0.0523422	0.153377	-0.843263	-1.41674	165746	4
1065	UBA6	-1.23381	-1.23381	0.0523632	0.153377	-0.928838	-1.35643	142964	2
1072	BYSL	-1.30128	-1.17647	0.0526438	0.154056	-0.842965	-1.41623	166701	4
1075	FAM163A	-1.4261	-1.4261	0.0528324	0.154179	-0.928483	-1.35591	144245	2
1074	UBE2L3	-1.6672	-1.39242	0.0528333	0.154179	-0.881679	-1.39318	156619	3
1076	MCM10	-1.40766	-1.62557	0.0528712	0.154179	-0.84275	-1.41587	167421	4
1073	ELAVL1	-1.11013	-0.85518	0.0528826	0.154179	-0.842738	-1.41585	167457	4
1077	RBM39	-2.04252	-2.11116	0.0529429	0.154212	-0.88158	-1.39302	156944	3
1078	FNIP2	-1.28813	-1.28813	0.0530478	0.154374	-0.928327	-1.35568	144833	2
1079	ETV1	-1.22858	-1.22858	0.0531152	0.154427	-0.92827	-1.3556	145017	2
1081	KIF18B	-1.85607	-2.05197	0.0532489	0.154618	-0.881282	-1.39255	157851	3
1080	KIF14	-1.73671	-1.45183	0.0532792	0.154618	-0.881253	-1.39251	157941	3
1082	TUBB4B	-1.49253	-1.14462	0.0534001	0.154826	-0.842241	-1.41502	169096	4
1083	CREB1	-0.941251	-0.967389	0.0535606	0.155148	-0.880998	-1.3921	158775	3
1084	EIF2B5	-1.64322	-1.23249	0.0536376	0.155228	-0.842	-1.41461	169848	4
1085	STXBP5	-1.27305	-1.27305	0.053766	0.155454	-0.927745	-1.35483	146794	2
1086	POLA1	-1.53184	-1.49485	0.0538511	0.155454	-0.841803	-1.41428	170524	4
1087	BRIX1	-2.08422	-2.08422	0.0538642	0.155454	-0.927674	-1.35473	147062	2
1088	PLXND1	-1.24539	-1.24539	0.0539477	0.155529	-0.927603	-1.35462	147290	2
1089	PRR15L	-1.27713	-1.27713	0.0539895	0.155529	-0.927575	-1.35458	147404	2
1091	VDAC3	-1.27208	-1.27208	0.054233	0.156062	-0.92739	-1.35431	148069	2
1090	GTF2H4	-1.29485	-1.19879	0.0542736	0.156062	-0.841404	-1.41361	171862	4
1092	PPIL2	-0.929826	-0.894632	0.0543317	0.156086	-0.880302	-1.391	161061	3
1094	GAS2L3	-1.41299	-1.41299	0.0546286	0.156704	-0.927078	-1.35386	149149	2
1093	NUP98	-1.69758	-1.08715	0.0546468	0.156704	-0.880032	-1.39058	161995	3
1096	TEX2	-1.42995	-1.42995	0.0547513	0.156804	-0.926978	-1.35371	149484	2
1095	OSBP	-1.85356	-1.39927	0.0547814	0.156804	-0.879905	-1.39038	162394	3
1097	RRM2	-2.44899	-3.02925	0.0548313	0.156804	-0.879857	-1.3903	162542	3
1098	DYRK4	-1.30145	-1.30145	0.0553637	0.158182	-0.92651	-1.35303	151156	2
1099	OGDH	-1.36859	-1.16582	0.0554522	0.158291	-0.840282	-1.41173	175594	4
1102	CCDC125	-1.28521	-1.28521	0.0555179	0.158304	-0.926382	-1.35284	151577	2
1100	CSTF1	-1.21037	-1.13675	0.0555921	0.158304	-0.84014	-1.41149	176037	4
1101	OR5H2	-1.27649	-1.27649	0.055608	0.158304	-0.926311	-1.35274	151823	2
1103	MED23	-1.33362	-1.33362	0.0556952	0.158408	-0.92624	-1.35263	152061	2
1104	RPAP2	-1.56535	-1.38511	0.0557944	0.158547	-0.87901	-1.38896	165397	3
1105	EXOSC8	-1.46766	-1.39156	0.0559398	0.158811	-0.839814	-1.41094	177138	4
1106	NRARP	-1.39713	-1.39713	0.0559885	0.158811	-0.926013	-1.3523	152862	2
1107	RPL5	-2.12728	-2.12728	0.0561369	0.159088	-0.9259	-1.35214	153267	2
1115	EP400NL	-1.3889	-1.3889	0.0562372	0.159188	-0.925829	-1.35203	153541	2
1113	CDCA5	-1.30071	-1.23489	0.0563658	0.159188	-0.878499	-1.38815	167091	3
1120	GART	-1.90769	-2.52593	0.0563945	0.159188	-0.878474	-1.38811	167176	3
1117	NHLRC2	-1.37629	-1.52449	0.0564303	0.159188	-0.878442	-1.38806	167282	3
1110	GNB4	-1.03244	-0.902177	0.0564448	0.159188	-0.878428	-1.38804	167325	3
1119	LAGE3	-1.92638	-1.92638	0.0565167	0.159188	-0.925602	-1.3517	154304	2
1114	NDUFB2	-1.25415	-1.25415	0.0566262	0.159188	-0.925516	-1.35158	154603	2
1109	NOL11	-0.804706	-0.809658	0.0566377	0.159188	-0.839147	-1.40982	179348	4
1118	PRPF4B	-1.4852	-1.7652	0.0566617	0.159188	-0.87823	-1.38773	167968	3
1116	PPP1R2	-1.41212	-1.42213	0.0567113	0.159188	-0.839074	-1.4097	179581	4
1108	NIPA2	-0.894344	-0.781841	0.0567997	0.159188	-0.83899	-1.40956	179861	4
1112	FOXK1	-1.12206	-1.15965	0.0568013	0.159188	-0.878102	-1.38753	168382	3
1111	TRAIP	-0.977242	-0.975957	0.056831	0.159188	-0.878073	-1.38748	168470	3
1121	NCAPH	-1.87748	-1.87748	0.0569903	0.159492	-0.925247	-1.35118	155597	2
1122	COL19A1	-1.23919	-1.23919	0.057072	0.159578	-0.92519	-1.3511	155820	2
1129	MARCH5	-1.25498	-1.40673	0.0572339	0.159864	-0.838565	-1.40884	181236	4
1125	IMP4	-1.83809	-1.22274	0.0573401	0.159864	-0.877633	-1.38679	169979	3
1132	CUL1	-2.02887	-1.92863	0.0573593	0.159864	-0.838444	-1.40864	181633	4
1130	TTC1	-1.49221	-1.48726	0.0573855	0.159864	-0.838423	-1.4086	181716	4
1126	ETAA1	-1.22553	-1.22553	0.0574866	0.159864	-0.924878	-1.35064	156952	2
1127	RPP30	-1.44879	-1.35171	0.0575383	0.159864	-0.838266	-1.40834	182200	4
1133	TOP3A	-1.69494	-1.96095	0.0576372	0.159864	-0.877364	-1.38636	170860	3
1124	ZNF691	-1.23559	-1.214	0.0576706	0.159864	-0.877335	-1.38632	170959	3
1128	ARPC3	-1.27915	-1.39464	0.057683	0.159864	-0.838124	-1.4081	182658	4
1123	ADAR	-1.00187	-0.847859	0.0576947	0.159864	-0.83811	-1.40808	182695	4
1131	NOB1	-1.81008	-1.81008	0.0577488	0.159864	-0.924679	-1.35035	157668	2
1134	RNF113A	-2.02611	-2.43338	0.0577853	0.159864	-0.877227	-1.38614	171299	3
1135	NSMCE2	-2.27917	-2.22863	0.0578653	0.159945	-0.877158	-1.38604	171536	3
1136	RPAP1	-1.17471	-1.22997	0.0582198	0.160783	-0.837613	-1.40724	184358	4
1137	DTYMK	-1.08557	-1.09704	0.0583176	0.160912	-0.876782	-1.38544	172877	3
1138	SEC24B	-0.971402	-0.929053	0.058432	0.161072	-0.876682	-1.38528	173216	3
1139	C12orf23	-0.986159	-1.04581	0.0584782	0.161072	-0.87664	-1.38522	173353	3
1140	ZNF844	-1.35563	-1.35563	0.0586279	0.161342	-0.924012	-1.34938	160068	2
1141	LYRM4	-1.26497	-1.15218	0.0588415	0.161788	-0.876341	-1.38474	174430	3
1142	MOB4	-1.11129	-1.12609	0.0589302	0.16185	-0.876271	-1.38463	174693	3
1143	ATP6V1E1	-2.09117	-1.87871	0.058967	0.16185	-0.876242	-1.38459	174802	3
1145	VPS72	-1.06775	-1.07247	0.0592948	0.16239	-0.83662	-1.40557	187762	4
1146	RTFDC1	-2.14791	-2.14791	0.0593153	0.16239	-0.923515	-1.34865	161945	2
1144	ETNK1	-1.0416	-0.948736	0.0593189	0.16239	-0.87593	-1.38409	175845	3
1150	MUM1L1	-1.27392	-1.27392	0.0594681	0.16243	-0.923401	-1.34849	162362	2
1152	DDX18	-1.57352	-1.57352	0.0595611	0.16243	-0.92333	-1.34838	162616	2
1148	FAM183A	-1.0641	-1.03354	0.0595749	0.16243	-0.836364	-1.40514	188649	4
1151	PTP4A2	-1.3919	-1.37819	0.0596156	0.16243	-0.836336	-1.4051	188778	4
1149	SIGLEC6	-1.21443	-1.21443	0.0596157	0.16243	-0.923288	-1.34832	162765	2
1147	PAICS	-0.94754	-0.825816	0.0596441	0.16243	-0.836307	-1.40505	188868	4
1153	AHSA1	-1.62877	-1.62877	0.0597358	0.162539	-0.923202	-1.3482	163093	2
1154	PWP2	-2.10621	-2.71744	0.0598023	0.162579	-0.875517	-1.38344	177278	3
1155	ZEB2	-1.4716	-1.31962	0.0599132	0.16274	-0.875419	-1.38329	177607	3
1156	RDH10	-1.1976	-1.1976	0.0601175	0.163154	-0.922904	-1.34776	164135	2
1157	ARL13A	-1.2433	-1.2433	0.0601955	0.163224	-0.922848	-1.34768	164348	2
1158	UBD	-1.34088	-1.34088	0.0605804	0.164126	-0.922564	-1.34726	165399	2
1159	DTX3L	-1.64397	-1.64397	0.0606896	0.16428	-0.922479	-1.34714	165697	2
1160	SCFD2	-1.07846	-0.961838	0.0607566	0.16432	-0.874695	-1.38214	180107	3
1161	NGDN	-1.65311	-1.95894	0.0608719	0.16449	-0.874595	-1.38199	180449	3
1162	NELFA	-1.34634	-1.02866	0.0609897	0.164667	-0.874496	-1.38183	180798	3
1164	ORC2	-1.18808	-1.18808	0.0614701	0.165689	-0.921882	-1.34627	167828	2
1163	GABRA2	-0.909173	-0.903638	0.0614737	0.165689	-0.874099	-1.3812	182233	3
1165	BARD1	-1.27736	-1.27736	0.0616148	0.165927	-0.921783	-1.34612	168223	2
1166	PPP2R4	-1.51838	-1.32145	0.0618035	0.166292	-0.834386	-1.40182	195706	4
1167	STK11	-2.07592	-2.07592	0.0621539	0.167092	-0.921385	-1.34554	169695	2
1168	GUCA2A	-0.983912	-0.991514	0.0622611	0.167197	-0.873446	-1.38017	184567	3
1169	ARL6IP6	-1.36947	-1.36947	0.0622997	0.167197	-0.921286	-1.3454	170093	2
1170	RAB11A	-1.33053	-1.33053	0.0624846	0.167551	-0.921144	-1.34519	170598	2
1172	TMEM258	-1.35172	-1.37938	0.0626106	0.167653	-0.833667	-1.40061	198262	4
1171	WDR44	-1.53812	-0.922688	0.0626298	0.167653	-0.873119	-1.37965	185660	3
1173	PDCL	-1.43389	-1.43389	0.0626894	0.16767	-0.920988	-1.34496	171157	2
1174	PAF1	-1.47048	-1.47048	0.0628692	0.168008	-0.92086	-1.34478	171648	2
1179	THG1L	-1.351	-1.351	0.0630765	0.168188	-0.92069	-1.34453	172214	2
1177	DDX5	-1.24864	-1.24864	0.0631186	0.168188	-0.920662	-1.34449	172329	2
1181	RAB1B	-1.38867	-1.45659	0.0632107	0.168188	-0.833127	-1.39971	200162	4
1182	EMC4	-1.36549	-1.48552	0.0633122	0.168188	-0.872551	-1.37876	187683	3
1183	AAAS	-1.57324	-1.57324	0.0633263	0.168188	-0.920505	-1.34426	172896	2
1180	EXOSC10	-1.42659	-1.42659	0.0634234	0.168188	-0.920434	-1.34415	173161	2
1176	ZNF740	-1.18691	-1.18691	0.0634417	0.168188	-0.92042	-1.34413	173211	2
1178	KIF18A	-1.55749	-1.30353	0.0634494	0.168188	-0.832927	-1.39937	200918	4
1175	RWDD2A	-0.974143	-0.888874	0.063459	0.168188	-0.872423	-1.37855	188118	3
1184	TRIM43	-1.65909	-1.65909	0.0634831	0.168188	-0.920392	-1.34409	173324	2
1185	POLA2	-1.74559	-2.12069	0.0635257	0.168188	-0.872367	-1.37846	188316	3
1186	LRRTM4	-1.26466	-1.26466	0.0636362	0.168338	-0.920278	-1.34393	173742	2
1187	DOCK11	-1.23208	-1.23208	0.0637255	0.168433	-0.920221	-1.34384	173986	2
1196	PAK1IP1	-1.47949	-1.44704	0.0639916	0.168735	-0.832445	-1.39856	202635	4
1195	MTERFD3	-1.43026	-1.43026	0.0639962	0.168735	-0.920009	-1.34353	174725	2
1190	CHMP1A	-1.19254	-1.19254	0.064094	0.168735	-0.919938	-1.34343	174992	2
1194	OR51E2	-1.37402	-1.37402	0.0641724	0.168735	-0.919881	-1.34335	175206	2
1193	CAT	-1.34474	-1.34474	0.06419	0.168735	-0.919867	-1.34332	175254	2
1197	CASC5	-1.80183	-1.79196	0.0642311	0.168735	-0.871799	-1.37757	190407	3
1188	ABCA1	-1.12886	-1.00306	0.0643198	0.168735	-0.871728	-1.37745	190670	3
1189	COPZ1	-1.14936	-1.078	0.0643839	0.168735	-0.871671	-1.37737	190860	3
1191	THOC5	-1.22231	-1.22231	0.0644053	0.168735	-0.919696	-1.34308	175842	2
1192	RMI1	-1.2689	-1.23406	0.064415	0.168735	-0.871643	-1.37732	190952	3
1198	PPCS	-1.86959	-2.14436	0.0644312	0.168735	-0.871629	-1.3773	191000	3
1199	FFAR2	-1.34572	-1.34572	0.0645592	0.168831	-0.919583	-1.34291	176262	2
1200	USP8	-1.85284	-2.10984	0.0645752	0.168831	-0.871515	-1.37712	191427	3
1201	SEMA7A	-0.823809	-0.760495	0.0646617	0.168874	-0.83185	-1.39756	204757	4
1202	CDK12	-1.26698	-1.15054	0.0646993	0.168874	-0.871416	-1.37696	191795	3
1203	RBM27	-1.26851	-1.26851	0.0647863	0.168961	-0.919412	-1.34266	176882	2
1204	CPSF3L	-2.10455	-1.87009	0.0648825	0.169071	-0.831665	-1.39725	205456	4
1207	CTDSPL2	-1.16595	-1.16595	0.0651481	0.169575	-0.919157	-1.34229	177870	2
1206	ATG10	-1.15729	-1.15729	0.065232	0.169575	-0.9191	-1.34221	178099	2
1205	TIMM23	-1.32782	-1.06242	0.0652377	0.169575	-0.870976	-1.37627	193391	3
1208	NCF1	-0.948191	-0.859393	0.0653899	0.16983	-0.870848	-1.37606	193842	3
1209	RSPO2	-1.22503	-1.22503	0.0655246	0.170033	-0.918887	-1.34189	178898	2
1210	PTTG1	-1.61618	-1.61796	0.0655764	0.170033	-0.870692	-1.37582	194395	3
1212	USP49	-1.22178	-1.22178	0.0657484	0.170303	-0.918731	-1.34167	179509	2
1211	DNMT1	-1.2119	-1.2119	0.0657891	0.170303	-0.918703	-1.34162	179620	2
1213	CENPW	-1.61068	-1.86153	0.065908	0.17047	-0.870422	-1.37539	195378	3
1214	PLD1	-1.41929	-1.41929	0.0660253	0.170633	-0.918546	-1.3414	180265	2
1215	CLEC6A	-1.16026	-1.16026	0.0664436	0.171527	-0.918248	-1.34096	181407	2
1216	CYP39A1	-1.21507	-1.21507	0.0664802	0.171527	-0.91822	-1.34092	181507	2
1217	ECT2	-1.77531	-1.37648	0.0665705	0.171619	-0.869868	-1.37452	197342	3
1218	ZFYVE20	-1.16136	-0.860041	0.0667557	0.171955	-0.869726	-1.37429	197891	3
1219	SECISBP2	-0.986206	-0.988328	0.0669365	0.172279	-0.869584	-1.37407	198427	3
1220	MPL	-1.08787	-1.11384	0.0670563	0.172446	-0.869485	-1.37391	198782	3
1221	RAB7L1	-1.2315	-1.2315	0.0672212	0.172729	-0.917666	-1.34011	183530	2
1222	FKBP6	-1.25045	-1.37458	0.0673049	0.172802	-0.869272	-1.37357	199519	3
1225	BANP	-2.00436	-2.00436	0.067527	0.173049	-0.917439	-1.33978	184365	2
1224	USP37	-1.42729	-1.42729	0.0675483	0.173049	-0.917425	-1.33976	184423	2
1223	GEMIN4	-1.38735	-1.38735	0.0675662	0.173049	-0.917411	-1.33974	184472	2
1226	RPP38	-1.65823	-1.44133	0.0676945	0.173236	-0.868946	-1.37306	200674	3
1227	CHCHD1	-0.986926	-0.837492	0.0677667	0.17328	-0.868889	-1.37297	200888	3
1228	KDSR	-1.2586	-1.2586	0.0680197	0.173688	-0.91707	-1.33924	185710	2
1229	CWC22	-1.6085	-1.41544	0.068037	0.173688	-0.828904	-1.39261	215445	4
1234	ALG11	-1.32573	-1.25545	0.0681636	0.173692	-0.828798	-1.39243	215846	4
1235	UBE2J2	-1.45651	-1.43843	0.0683021	0.173692	-0.868449	-1.37227	202475	3
1231	STMN1	-1.065	-1.15744	0.0683422	0.173692	-0.86842	-1.37223	202594	3
1236	ZPBP	-1.49606	-1.49606	0.0683705	0.173692	-0.916815	-1.33887	186668	2
1232	CD63	-1.20691	-1.20691	0.0683903	0.173692	-0.9168	-1.33885	186722	2
1233	PMPCB	-1.22577	-1.22577	0.0684105	0.173692	-0.916786	-1.33883	186777	2
1237	CHD4	-1.92584	-2.36524	0.0684694	0.173692	-0.868321	-1.37207	202971	3
1230	FAM166B	-1.14671	-1.14671	0.0684811	0.173692	-0.916744	-1.33876	186970	2
1238	PGK1	-1.11068	-1.08247	0.0687851	0.174322	-0.868065	-1.37167	203907	3
1243	SLC35A1	-1.38959	-1.58929	0.0688897	0.174323	-0.86798	-1.37153	204217	3
1242	TRAPPC2L	-1.52824	-1.52824	0.068961	0.174323	-0.916417	-1.33829	188280	2
1240	LAMTOR3	-1.3034	-1.3034	0.0690207	0.174323	-0.916374	-1.33823	188443	2
1239	CGRRF1	-1.20799	-1.20799	0.0690609	0.174323	-0.916346	-1.33818	188553	2
1241	GFPT1	-1.48314	-1.3698	0.069063	0.174323	-0.82806	-1.39119	218694	4
1244	LacZ	-1.26544	-1.26544	0.0691822	0.174473	-0.916261	-1.33806	188884	2
1245	RPP40	-1.34411	-1.34411	0.0692335	0.174473	-0.916218	-1.338	189024	2
1247	SMG7	-1.40973	-1.50349	0.069333	0.174542	-0.827824	-1.3908	219549	4
1246	CBX3	-1.20224	-1.20224	0.0693723	0.174542	-0.916119	-1.33785	189403	2
1248	ZNHIT6	-1.2083	-0.907451	0.069502	0.174729	-0.867512	-1.37079	206032	3
1249	SERPINB12	-0.848012	-0.854546	0.0696183	0.174881	-0.867427	-1.37066	206377	3
1250	TNPO3	-1.43658	-1.04998	0.069734	0.175021	-0.867327	-1.3705	206720	3
1251	DDX11	-1.11916	-1.2594	0.0697853	0.175021	-0.867285	-1.37043	206872	3
1252	SLC3A1	-0.933661	-0.86212	0.0700842	0.175552	-0.867058	-1.37007	207758	3
1253	PAXBP1	-1.42177	-1.42177	0.0701088	0.175552	-0.915594	-1.33708	191414	2
1254	CIRH1A	-1.62503	-1.60686	0.0701856	0.175604	-0.827116	-1.38961	222249	4
1255	PPP2R3C	-1.3729	-1.16771	0.070265	0.175663	-0.866916	-1.36985	208294	3
1256	TPRKB	-1.22472	-1.22472	0.0704044	0.175871	-0.915395	-1.33679	192221	2
1257	MED8	-1.92145	-2.09242	0.0705032	0.175978	-0.866717	-1.36954	209000	3
1259	GPR87	-1.52526	-1.52526	0.0708476	0.176594	-0.915068	-1.33632	193431	2
1258	NFE2L2	-1.3861	-1.3861	0.0708835	0.176594	-0.91504	-1.33628	193529	2
1260	DDX41	-1.41033	-1.56211	0.0709188	0.176594	-0.866376	-1.369	210232	3
1261	TNIP1	-1.3718	-1.04194	0.0711485	0.177026	-0.866192	-1.36871	210913	3
1262	ANAPC13	-1.38526	-1.38526	0.0714508	0.177637	-0.914643	-1.3357	195078	2
1263	CDK2	-1.38603	-1.38603	0.0715545	0.177754	-0.914572	-1.33559	195361	2
1264	RNF32	-1.42224	-1.42224	0.0716164	0.177767	-0.914529	-1.33553	195530	2
1265	TEX10	-1.25759	-1.04015	0.0717405	0.177935	-0.865723	-1.36797	212668	3
1266	GEMIN2	-1.09687	-0.807856	0.0718296	0.178015	-0.865652	-1.36785	212932	3
1267	SLC25A48	-0.941829	-0.86023	0.0720252	0.178331	-0.865496	-1.36761	213512	3
1268	UBR4	-1.28247	-1.39582	0.0720706	0.178331	-0.825575	-1.38702	228218	4
1269	QRSL1	-0.834695	-0.76509	0.0724654	0.179166	-0.825249	-1.38647	229468	4
1270	DBF4	-1.82295	-2.14059	0.0729192	0.180146	-0.864815	-1.36653	216162	3
1273	GANC	-1.19167	-1.19167	0.0730606	0.18024	-0.913479	-1.334	199473	2
1275	CRYGS	-1.33459	-1.33459	0.0731155	0.18024	-0.913436	-1.33393	199623	2
1271	MCMBP	-1.08632	-1.04658	0.0731334	0.18024	-0.864644	-1.36626	216797	3
1272	SHFM1	-1.44343	-1.11222	0.0731877	0.18024	-0.864602	-1.36619	216958	3
1274	SGK3	-1.1353	-1.21303	0.073244	0.18024	-0.864559	-1.36613	217125	3
1276	SGOL1	-1.88287	-1.88287	0.0734679	0.180649	-0.91318	-1.33356	200585	2
1277	METTL23	-1.27125	-1.27125	0.0736151	0.18087	-0.913081	-1.33342	200987	2
1278	CAP2	-1.14542	-1.14542	0.0739653	0.181588	-0.91284	-1.33306	201943	2
1279	NCBP1	-1.49508	-1.11714	0.074028	0.1816	-0.863934	-1.36514	219449	3
1280	CHIC2	-1.68042	-1.68042	0.0741726	0.181813	-0.912698	-1.33286	202509	2
1281	DNAJC27	-1.11557	-1.11557	0.0742667	0.181901	-0.912627	-1.33275	202766	2
1282	OR5R1	-1.25101	-1.25101	0.0744612	0.182235	-0.912485	-1.33255	203297	2
1283	MED4	-1.4322	-1.4322	0.0745443	0.182297	-0.912428	-1.33246	203524	2
1284	EIF2B2	-2.02793	-2.47866	0.0748281	0.182849	-0.863296	-1.36413	221821	3
1285	ZDHHC15	-1.49459	-1.49459	0.0749355	0.182968	-0.912158	-1.33207	204592	2
1287	RRP9	-1.04222	-0.923835	0.075074	0.182984	-0.863111	-1.36384	222550	3
1289	TXNDC15	-1.15755	-1.15755	0.0751194	0.182984	-0.912031	-1.33188	205094	2
1288	ATP6AP1	-1.42211	-1.13577	0.0751405	0.182984	-0.863054	-1.36375	222747	3
1286	ACAN	-0.803286	-0.79856	0.0751749	0.182984	-0.863026	-1.3637	222849	3
1290	CPOX	-1.05896	-1.09947	0.0753126	0.183177	-0.822935	-1.38258	238484	4
1291	LDHA	-1.39137	-1.39137	0.0754497	0.183369	-0.911789	-1.33153	205996	2
1294	FAM107B	-1.30297	-1.30297	0.0755351	0.183406	-0.911733	-1.33145	206229	2
1292	ISPD	-1.11048	-1.11048	0.0756014	0.183406	-0.91169	-1.33138	206410	2
1293	INTS7	-1.24572	-1.24572	0.0756406	0.183406	-0.911662	-1.33134	206517	2
1296	NUP188	-0.953557	-0.84175	0.0757406	0.18346	-0.862557	-1.36296	224526	3
1298	OR2AJ1	-1.26638	-1.26638	0.0758013	0.18346	-0.911548	-1.33118	206956	2
1297	PPP1R11	-1.05462	-1.11165	0.0759053	0.18346	-0.822481	-1.38182	240361	4
1295	AASS	-0.965136	-0.8013	0.0759339	0.18346	-0.862401	-1.36272	225099	3
1299	C19orf25	-1.71214	-1.71214	0.0759548	0.18346	-0.911434	-1.33101	207375	2
1301	RALGAPB	-1.54256	-1.54256	0.0761182	0.183698	-0.911321	-1.33085	207821	2
1300	WARS	-1.12394	-1.01755	0.0761704	0.183698	-0.862217	-1.36243	225800	3
1302	C3orf38	-1.49051	-1.49051	0.0763866	0.184078	-0.911136	-1.33058	208554	2
1305	COG5	-1.46887	-1.46887	0.0764899	0.184082	-0.911065	-1.33047	208836	2
1303	YME1L1	-0.974929	-1.00003	0.0765482	0.184082	-0.861933	-1.36198	226920	3
1304	BAZ1B	-1.25496	-1.43012	0.076564	0.184082	-0.861919	-1.36195	226967	3
1306	ATG5	-1.03655	-1.06795	0.0767529	0.184395	-0.821828	-1.38072	243045	4
1313	PRMT1	-1.81989	-1.451	0.0770239	0.184496	-0.821615	-1.38036	243903	4
1307	WDR77	-1.3582	-0.929993	0.0770427	0.184496	-0.861535	-1.36135	228386	3
1310	CETP	-1.12072	-1.12072	0.0771272	0.184496	-0.910611	-1.32981	210576	2
1314	RPS19	-2.07889	-2.48858	0.0771348	0.184496	-0.861464	-1.36124	228659	3
1309	ERP44	-1.10282	-1.10282	0.0771569	0.184496	-0.910597	-1.32979	210657	2
1308	PHF12	-1.05443	-1.02893	0.0771941	0.184496	-0.821487	-1.38015	244442	4
1311	SLC7A2	-1.28167	-1.28167	0.077243	0.184496	-0.91054	-1.3297	210892	2
1312	ARID2	-1.29846	-1.39069	0.0772648	0.184496	-0.821432	-1.38006	244666	4
1315	SEC14L1	-1.08764	-1.08764	0.0773851	0.184642	-0.910441	-1.32956	211280	2
1316	GAK	-1.6633	-1.92941	0.0775079	0.184795	-0.861195	-1.36081	229765	3
1317	CCDC115	-1.02681	-0.929734	0.0775966	0.184866	-0.861124	-1.3607	230028	3
1318	TEKT4	-1.27605	-1.27605	0.0783267	0.186464	-0.909816	-1.32865	213851	2
1319	PDCD7	-1.3237	-1.23113	0.0783884	0.186469	-0.860513	-1.35973	232375	3
1320	IST1	-1.23128	-1.01646	0.0786258	0.186702	-0.860329	-1.35944	233079	3
1323	DR1	-1.62555	-1.63332	0.0787024	0.186702	-0.860267	-1.35935	233306	3
1322	SENP1	-1.15337	-1.10079	0.078745	0.186702	-0.820252	-1.37807	249353	4
1321	DICER1	-1.41349	-1.02311	0.0787496	0.186702	-0.860229	-1.35929	233446	3
1324	FARSB	-1.90184	-2.40843	0.0787834	0.186702	-0.860201	-1.35924	233546	3
1325	CDX2	-1.3696	-1.3696	0.0791007	0.187302	-0.909277	-1.32786	215964	2
1326	CXorf56	-1.61811	-1.925	0.0791561	0.187302	-0.859931	-1.35881	234651	3
1327	ZBTB24	-1.22792	-1.20729	0.0792597	0.187406	-0.85986	-1.3587	234958	3
1329	TTC9	-1.10504	-1.10504	0.0793739	0.187523	-0.909092	-1.32759	216710	2
1330	UBC	-1.49816	-1.76606	0.0794725	0.187523	-0.859704	-1.35846	235589	3
1328	HORMAD2	-1.07585	-1.07585	0.0794882	0.187523	-0.909021	-1.32749	217022	2
1332	NEDD8	-2.00388	-2.00388	0.0796226	0.187645	-0.908936	-1.32736	217389	2
1331	NHP2	-1.25098	-1.20614	0.0796594	0.187645	-0.859562	-1.35823	236143	3
1334	PPP1R17	-1.06919	-1.06919	0.0800522	0.188406	-0.908652	-1.32695	218562	2
1339	RIOK1	-1.92045	-1.7918	0.0801216	0.188406	-0.859211	-1.35768	237513	3
1333	WDR49	-0.776665	-0.811827	0.0802147	0.188406	-0.819116	-1.37617	254007	4
1335	PPP1R21	-1.2171	-1.2171	0.0802636	0.188406	-0.90851	-1.32674	219139	2
1336	RINT1	-1.24963	-1.24963	0.0803365	0.188406	-0.908468	-1.32668	219338	2
1338	NRBP1	-1.6241	-1.51031	0.0803439	0.188406	-0.859037	-1.3574	238172	3
1337	RCC1	-1.78887	-1.48697	0.0804026	0.188406	-0.858986	-1.35732	238346	3
1340	BCCIP	-1.1924	-1.33616	0.0805729	0.188664	-0.858867	-1.35713	238851	3
1341	CTDP1	-2.69793	-2.69793	0.08071	0.188845	-0.908206	-1.3263	220358	2
1342	NME1	-1.02123	-1.14259	0.0807814	0.188871	-0.85871	-1.35689	239469	3
1343	WDR5	-2.06094	-2.06094	0.0809188	0.189051	-0.90807	-1.3261	220928	2
1347	SEPW1	-1.26925	-1.26925	0.0811606	0.189231	-0.907914	-1.32587	221588	2
1348	TXNL4B	-1.75883	-2.2455	0.0811805	0.189231	-0.858407	-1.35641	240652	3
1346	SPRY2	-1.1591	-1.1591	0.0812294	0.189231	-0.907871	-1.32581	221776	2
1345	SLFNL1	-0.9735	-1.0425	0.081278	0.189231	-0.818293	-1.37478	257374	4
1344	PRAMEF8	-0.982679	-0.846987	0.0812968	0.189231	-0.858327	-1.35628	240997	3
1349	RPL35A	-1.81341	-1.80385	0.0814048	0.189342	-0.858242	-1.35615	241317	3
1350	ZNF426	-0.845614	-0.805366	0.0816379	0.189743	-0.858072	-1.35588	242008	3
1351	RSRC1	-1.09421	-1.09421	0.0817268	0.189809	-0.907545	-1.32533	223134	2
1352	LAS1L	-1.25784	-1.25784	0.0817883	0.189812	-0.907502	-1.32527	223302	2
1353	DDX52	-1.3172	-1.04436	0.0820265	0.190224	-0.857774	-1.3554	243160	3
1354	NAGK	-1.2163	-1.2163	0.0820938	0.19024	-0.907289	-1.32496	224136	2
1355	EIF4E	-2.18218	-2.18218	0.0822081	0.190364	-0.907218	-1.32485	224448	2
1356	XIRP2	-1.53862	-1.53862	0.0823806	0.190623	-0.907105	-1.32469	224919	2
1357	VPS13D	-0.898263	-0.953517	0.0824495	0.190642	-0.857475	-1.35493	244414	3
1358	OTUD5	-0.83813	-0.793645	0.0826044	0.190823	-0.857362	-1.35475	244873	3
1359	DCP2	-1.36541	-1.36541	0.0826494	0.190823	-0.90692	-1.32442	225653	2
1362	ABT1	-1.29849	-1.20938	0.0828911	0.191072	-0.857149	-1.35442	245723	3
1363	PTPLB	-1.27009	-1.27009	0.0829021	0.191072	-0.906764	-1.32419	226343	2
1361	HTR2A	-1.0816	-1.0816	0.0829509	0.191072	-0.906736	-1.32415	226476	2
1360	SPATA31E1	-1.08115	-1.08115	0.0830999	0.191072	-0.906636	-1.324	226883	2
1365	RPL19	-1.44308	-1.44308	0.0831633	0.191072	-0.906594	-1.32394	227056	2
1364	PTPRF	-1.13978	-1.31246	0.0831718	0.191072	-0.85695	-1.3541	246555	3
1366	ZWINT	-1.66183	-1.66183	0.0831834	0.191072	-0.90658	-1.32392	227111	2
1367	SMC6	-0.956747	-1.00863	0.0834821	0.191618	-0.856723	-1.35375	247475	3
1370	FAM149B1	-1.14225	-1.14225	0.083698	0.191843	-0.906239	-1.32342	228516	2
1368	DSCC1	-0.899557	-0.920749	0.0837027	0.191843	-0.816462	-1.37171	265052	4
1369	VHL	-0.97813	-0.966777	0.0838117	0.191843	-0.856482	-1.35336	248452	3
1371	ASZ1	-1.16757	-1.16757	0.0838244	0.191843	-0.906154	-1.3233	228861	2
1372	TMEM199	-1.2328	-1.2328	0.0842518	0.192681	-0.90587	-1.32288	230028	2
1373	STEAP4	-1.05688	-1.08147	0.0844911	0.193087	-0.855999	-1.3526	250466	3
1376	SRSF12	-1.04485	-1.04855	0.0846435	0.193222	-0.855886	-1.35242	250918	3
1379	PBDC1	-1.28042	-1.28042	0.0847375	0.193222	-0.905543	-1.32241	231354	2
1377	ADIPOR1	-1.12392	-1.12392	0.0848206	0.193222	-0.905487	-1.32233	231581	2
1382	ARIH1	-1.973	-2.13084	0.0848824	0.193222	-0.855715	-1.35215	251626	3
1374	STAG2	-1.27709	-0.812798	0.0849465	0.193222	-0.855673	-1.35209	251816	3
1378	DDHD2	-1.17287	-1.17287	0.0849734	0.193222	-0.905387	-1.32218	231998	2
1380	TPT1	-1.32908	-1.32908	0.0850122	0.193222	-0.905359	-1.32214	232104	2
1381	SPTLC2	-1.77567	-1.61934	0.0850701	0.193222	-0.815468	-1.37004	269382	4
1375	KLHL1	-0.8655	-0.858455	0.0851037	0.193222	-0.855559	-1.35191	252282	3
1384	C16orf80	-1.09131	-1.04309	0.085497	0.193834	-0.855275	-1.35146	253448	3
1385	ZBTB49	-1.11355	-1.11355	0.0855363	0.193834	-0.905018	-1.32164	233535	2
1383	PDC	-0.866154	-0.795856	0.0855584	0.193834	-0.855233	-1.35139	253630	3
1386	CUL2	-1.59682	-1.66544	0.0856615	0.193927	-0.815025	-1.36929	271255	4
1387	MED9	-1.83808	-0.804269	0.0857466	0.19398	-0.855105	-1.35119	254188	3
1389	SRPRB	-1.58671	-1.67976	0.0859305	0.194249	-0.854977	-1.35099	254733	3
1388	TIPRL	-1.18817	-1.18817	0.085989	0.194249	-0.904734	-1.32123	234771	2
1390	TCP1	-1.74248	-2.19682	0.0861781	0.194536	-0.854809	-1.35072	255467	3
1391	PNN	-1.20262	-1.36786	0.0862691	0.194601	-0.814589	-1.36856	273179	4
1393	RPL37A	-1.46867	-1.46867	0.0863784	0.194613	-0.904479	-1.32085	235834	2
1392	CLEC16A	-0.759829	-0.635555	0.0864349	0.194613	-0.81446	-1.36834	273704	4
1394	FAM32A	-1.60373	-1.86453	0.0864601	0.194613	-0.854608	-1.3504	256303	3
1395	LSM11	-1.11947	-1.11947	0.0865659	0.194711	-0.904351	-1.32067	236346	2
1398	SETD2	-1.10579	-1.24595	0.086759	0.194962	-0.854395	-1.35007	257189	3
1396	ATP1A1	-1.66647	-0.808429	0.0868126	0.194962	-0.854352	-1.35	257348	3
1397	FNBP1	-1.06923	-1.06923	0.0868637	0.194962	-0.904152	-1.32038	237159	2
1399	ZNF804B	-1.12308	-1.12308	0.0870314	0.195199	-0.904039	-1.32021	237617	2
1400	APOC1	-1.20197	-1.20197	0.0871549	0.195336	-0.903953	-1.32009	237954	2
1409	CCDC25	-1.61662	-1.61662	0.0874647	0.195521	-0.903755	-1.3198	238800	2
1403	TLR6	-1.06845	-1.06845	0.087483	0.195521	-0.903741	-1.31978	238850	2
1405	KEAP1	-1.10894	-1.10894	0.0875046	0.195521	-0.903726	-1.31975	238909	2
1407	SEC16A	-1.06055	-1.15243	0.0875112	0.195521	-0.853856	-1.34921	259419	3
1401	ACAP2	-1.22351	-0.87615	0.0875885	0.195521	-0.853799	-1.34912	259648	3
1402	ZNF343	-0.97175	-1.06453	0.0876397	0.195521	-0.853756	-1.34906	259800	3
1406	PPIL3	-1.15213	-1.15213	0.0877731	0.195521	-0.903556	-1.31951	239642	2
1408	PRPF18	-1.36019	-1.26696	0.0878006	0.195521	-0.853643	-1.34888	260277	3
1410	SBNO1	-1.67133	-1.67133	0.0878163	0.195521	-0.903528	-1.31946	239760	2
1404	TEN1	-1.09995	-1.09995	0.0878599	0.195521	-0.903499	-1.31942	239879	2
1411	CDADC1	-1.08415	-1.08415	0.0879826	0.195655	-0.903428	-1.31932	240214	2
1412	AP1S2	-1.18259	-1.18259	0.0881562	0.195903	-0.903315	-1.31915	240688	2
1416	CDCA2	-1.49349	-1.73351	0.0884082	0.196041	-0.853217	-1.3482	262078	3
1414	MMP7	-1.03963	-1.03963	0.0884115	0.196041	-0.903144	-1.3189	241385	2
1415	TANGO6	-1.3189	-1.3189	0.0884309	0.196041	-0.90313	-1.31888	241438	2
1413	MAPK1IP1L	-1.03358	-1.03358	0.0884683	0.196041	-0.903102	-1.31884	241540	2
1417	RNF2	-1.03353	-1.17474	0.0885731	0.196135	-0.853103	-1.34803	262567	3
1421	SUGT1	-1.02108	-1.09317	0.088789	0.19637	-0.852947	-1.34778	263207	3
1423	GABPB2	-1.4251	-1.4251	0.0888653	0.19637	-0.902846	-1.31847	242624	2
1420	INCA1	-1.09279	-1.09279	0.0889935	0.19637	-0.902761	-1.31834	242974	2
1418	MDN1	-1.13409	-0.909937	0.0889978	0.19637	-0.852805	-1.34755	263826	3
1422	CENPO	-1.1843	-1.15891	0.0890406	0.19637	-0.812515	-1.36508	281955	4
1419	SETX	-1.03415	-1.03415	0.0890543	0.19637	-0.902718	-1.31828	243140	2
1424	NMU	-1.06825	-1.06825	0.0891224	0.196382	-0.902676	-1.31822	243326	2
1425	UBAC2	-1.28787	-1.28787	0.0892865	0.196606	-0.902576	-1.31808	243774	2
1427	PSMG1	-1.65896	-1.82219	0.089434	0.196607	-0.852507	-1.34708	265119	3
1426	NUDT4	-1.30845	-1.30845	0.0895169	0.196607	-0.90242	-1.31785	244403	2
1429	KRR1	-1.67896	-1.89321	0.0895258	0.196607	-0.852441	-1.34698	265391	3
1430	TINF2	-1.92997	-1.92997	0.0895799	0.196607	-0.902378	-1.31779	244575	2
1428	NOP14	-1.86085	-1.86085	0.0896004	0.196607	-0.902364	-1.31776	244631	2
1431	NELFCD	-1.58986	-1.58986	0.0897063	0.196702	-0.902293	-1.31766	244920	2
1434	CCNK	-1.58196	-1.58196	0.0900758	0.197228	-0.902051	-1.31731	245929	2
1433	ELAVL2	-1.30248	-1.30248	0.0901011	0.197228	-0.902037	-1.31729	245998	2
1432	URB1	-1.14395	-1.256	0.0901345	0.197228	-0.81172	-1.36374	285419	4
1435	USP50	-1.06929	-1.06929	0.0905304	0.197956	-0.901753	-1.31687	247170	2
1436	CLDN19	-0.993948	-1.04385	0.0905971	0.197964	-0.811394	-1.36319	286884	4
1437	ZNF397	-1.00534	-0.867364	0.0907324	0.198073	-0.851598	-1.34565	268968	3
1438	RB1CC1	-1.46578	-1.1449	0.0907729	0.198073	-0.85157	-1.3456	269088	3
1439	PATL2	-1.20344	-1.20344	0.0909695	0.198364	-0.901469	-1.31646	248369	2
1440	UBE2H	-1.14705	-0.791714	0.0911278	0.19842	-0.8513	-1.34518	270140	3
1441	PPIE	-0.995682	-0.905126	0.0911699	0.19842	-0.851272	-1.34513	270265	3
1442	TBL3	-1.22721	-1.22721	0.0911849	0.19842	-0.901327	-1.31625	248957	2
1443	TAOK2	-1.24901	-1.24901	0.0913017	0.198537	-0.901256	-1.31615	249276	2
1454	POLR2I	-1.79106	-1.52855	0.0914341	0.198687	-0.851087	-1.34484	271048	3
1449	DIS3L2	-1.11282	-1.11282	0.0915156	0.198687	-0.901114	-1.31594	249860	2
1444	TDG	-0.88477	-0.824115	0.0915899	0.198687	-0.850974	-1.34466	271510	3
1447	CCKAR	-1.03383	-1.03383	0.0917885	0.198687	-0.900944	-1.31569	250605	2
1455	TUBGCP4	-1.9395	-1.73123	0.091792	0.198687	-0.850832	-1.34444	272109	3
1448	HFM1	-1.05912	-1.05912	0.0918676	0.198687	-0.900887	-1.31561	250821	2
1451	CSDE1	-1.13565	-1.13565	0.0919804	0.198687	-0.900802	-1.31548	251129	2
1450	THAP4	-1.11795	-1.11795	0.0920042	0.198687	-0.900788	-1.31546	251194	2
1446	SUPT5H	-1.11424	-0.969859	0.0920423	0.198687	-0.850662	-1.34417	272851	3
1445	ADAMTSL4-AS1	-0.895332	-0.903495	0.0920598	0.198687	-0.850647	-1.34414	272903	3
1452	KCNK18	-1.19319	-1.19319	0.0920855	0.198687	-0.900745	-1.3154	251416	2
1453	TELO2	-1.51445	-1.51445	0.0921299	0.198687	-0.900717	-1.31536	251537	2
1457	IKBKG	-1.7771	-2.15336	0.0922086	0.198715	-0.850534	-1.34397	273344	3
1456	OR5T2	-1.18003	-1.18003	0.0922698	0.198715	-0.900632	-1.31524	251919	2
1458	STX5	-1.09008	-1.01223	0.0930553	0.200047	-0.849938	-1.34302	275854	3
1459	HNRNPD	-1.02826	-1.02826	0.0930587	0.200047	-0.900135	-1.31451	254073	2
1460	ZNF814	-1.34065	-1.34065	0.0930792	0.200047	-0.900121	-1.31449	254129	2
1461	RBM18	-1.312	-1.312	0.0932019	0.200174	-0.900035	-1.31436	254464	2
1462	ATP2B1	-1.1124	-1.1124	0.0932693	0.200182	-0.899993	-1.3143	254648	2
1463	RNF157	-1.08393	-1.08393	0.0936363	0.200803	-0.899766	-1.31397	255650	2
1464	FARSA	-1.42412	-1.42412	0.0936869	0.200803	-0.899737	-1.31393	255788	2
1465	SRCAP	-1.14312	-1.14312	0.0938246	0.200961	-0.899652	-1.3138	256164	2
1467	RAD51C	-1.46242	-1.46242	0.0939828	0.201017	-0.899553	-1.31366	256596	2
1468	NUDC	-1.87256	-1.89325	0.0940181	0.201017	-0.849272	-1.34197	278708	3
1466	C2orf80	-1.02288	-1.02288	0.0940425	0.201017	-0.89951	-1.3136	256759	2
1469	CPLX4	-1.05495	-1.05495	0.0942037	0.201178	-0.899411	-1.31345	257199	2
1470	CETN3	-1.25906	-1.25906	0.0942461	0.201178	-0.899382	-1.31341	257315	2
1471	HPS4	-1.04255	-1.04255	0.0944959	0.201574	-0.899212	-1.31316	257997	2
1472	ATR	-1.72546	-1.72546	0.0946186	0.201699	-0.899141	-1.31306	258332	2
1473	REST	-1.01884	-1.01884	0.0947384	0.201817	-0.89907	-1.31295	258659	2
1474	KLHL24	-0.923476	-0.929823	0.094911	0.20199	-0.84866	-1.341	281355	3
1476	FANCB	-1.06141	-1.17237	0.094972	0.20199	-0.848617	-1.34094	281536	3
1475	SELE	-1.05703	-1.05703	0.0950124	0.20199	-0.8989	-1.31271	259407	2
1477	GAS8	-1.26516	-1.26516	0.0950962	0.202031	-0.898843	-1.31262	259636	2
1478	KAT6A	-0.999451	-0.850928	0.0953281	0.202137	-0.808058	-1.35759	301865	4
1481	LEPRE1	-1.12069	-1.10723	0.0954342	0.202137	-0.848305	-1.34044	282906	3
1482	VPS51	-1.02263	-1.14523	0.0954497	0.202137	-0.848291	-1.34042	282952	3
1479	TAS2R7	-1.0257	-1.0257	0.0954629	0.202137	-0.898616	-1.31229	260637	2
1480	DNTTIP2	-1.02444	-1.03096	0.0954679	0.202137	-0.807958	-1.35742	302308	4
1483	SMARCA5	-1.12467	-0.903072	0.0955482	0.202171	-0.84822	-1.34031	283244	3
1484	MYBL2	-1.86343	-1.78182	0.0956801	0.202313	-0.848135	-1.34017	283635	3
1485	ZNF639	-1.06614	-1.06614	0.0960006	0.202854	-0.898275	-1.31179	262105	2
1486	DSTN	-1.14698	-1.14698	0.0964716	0.203713	-0.897963	-1.31134	263391	2
1487	USP14	-1.35602	-1.18223	0.0965849	0.203815	-0.807163	-1.35608	305845	4
1488	TAF2	-1.00132	-1.00132	0.0967437	0.203833	-0.897793	-1.31109	264134	2
1490	ZNF564	-1.10628	-1.10628	0.0967664	0.203833	-0.897778	-1.31107	264196	2
1489	BCAT1	-1.06579	-1.06579	0.096788	0.203833	-0.897764	-1.31105	264255	2
1491	ADAM17	-1.09765	-1.09765	0.0968763	0.203882	-0.897707	-1.31096	264496	2
1492	ROMO1	-0.819646	-0.838371	0.0970166	0.203981	-0.84724	-1.33876	287597	3
1493	NSUN5	-1.06178	-1.06178	0.0970664	0.203981	-0.897594	-1.3108	265015	2
1494	EIF2S2	-1.45428	-1.45428	0.0971184	0.203981	-0.897551	-1.31074	265157	2
1495	GDF5OS	-1.0875	-1.0875	0.0972092	0.204035	-0.897494	-1.31065	265405	2
1496	ARFRP1	-1.20395	-1.20395	0.0972964	0.204082	-0.897438	-1.31057	265643	2
1497	BPNT1	-1.01614	-0.96483	0.097411	0.204186	-0.846971	-1.33833	288766	3
1498	LMBRD2	-0.759346	-0.803844	0.0975696	0.204382	-0.806496	-1.35496	308963	4
1499	CCDC144A	-1.12849	-1.12849	0.0977447	0.204612	-0.897168	-1.31018	266867	2
1500	ORC5	-0.891721	-0.778453	0.0979618	0.204864	-0.806226	-1.35451	310205	4
1501	KCNH5	-1.09994	-1.09994	0.0979952	0.204864	-0.897012	-1.30995	267551	2
1502	CCDC91	-1.23811	-1.23811	0.0981282	0.205005	-0.896927	-1.30982	267914	2
1503	CCSER2	-1.04502	-1.04502	0.0982047	0.205029	-0.896884	-1.30976	268123	2
1504	SYNPR	-1.06921	-1.06921	0.0984805	0.205468	-0.896714	-1.30951	268876	2
1505	BRF1	-1.77362	-1.68808	0.0985798	0.205538	-0.846205	-1.33713	292231	3
1506	SNRNP35	-1.28397	-1.02287	0.0986655	0.20558	-0.846147	-1.33703	292485	3
1507	RPLP1	-1.59675	-1.59675	0.0991896	0.206535	-0.896259	-1.30885	270812	2
1508	GET4	-0.835396	-0.825273	0.0993243	0.206679	-0.845707	-1.33634	294438	3
1512	RASEF	-1.39947	-1.79173	0.0994947	0.206752	-0.845582	-1.33614	294943	3
1511	BUB1	-1.16689	-1.16689	0.0995764	0.206752	-0.896032	-1.30852	271868	2
1514	RNPC3	-1.4541	-1.90015	0.0996053	0.206752	-0.845504	-1.33602	295271	3
1510	INTS4	-1.5189	-1.11155	0.0996747	0.206752	-0.805034	-1.35251	315629	4
1509	C12orf75	-1.07607	-1.07607	0.0997138	0.206752	-0.895947	-1.30839	272243	2
1513	NDOR1	-1.43898	-1.8033	0.0997548	0.206752	-0.845409	-1.33587	295714	3
1515	PIGC	-1.22503	-1.22503	0.0998925	0.206896	-0.895834	-1.30823	272731	2
1516	SP1	-1.27966	-1.23487	0.0999557	0.206896	-0.804835	-1.35217	316519	4
1517	DCTN4	-0.920672	-0.794009	0.100137	0.207134	-0.845154	-1.33546	296847	3
1518	DRAP1	-1.39097	-1.72072	0.100363	0.207466	-0.844997	-1.33522	297518	3
1519	C9orf57	-0.839275	-0.771885	0.100482	0.207551	-0.844912	-1.33508	297871	3
1522	RTF1	-1.39641	-1.51499	0.100594	0.207551	-0.844841	-1.33497	298201	3
1520	ZNF423	-0.987234	-0.987234	0.100622	0.207551	-0.895394	-1.30759	274722	2
1521	CEBPZ	-1.37479	-1.25065	0.100669	0.207551	-0.804332	-1.35133	318777	4
1523	EDNRA	-1.03919	-1.03919	0.100776	0.207635	-0.895294	-1.30744	275143	2
1524	GON4L	-1.31162	-1.48362	0.100846	0.207644	-0.844671	-1.3347	298949	3
1525	ELP4	-1.00897	-1.00897	0.101036	0.207898	-0.895138	-1.30721	275853	2
1526	SNRPB2	-0.944738	-0.994358	0.10123	0.208161	-0.844415	-1.3343	300087	3
1527	KPNA2	-1.24037	-1.24037	0.101296	0.208161	-0.894982	-1.30698	276563	2
1530	ALG8	-1.0804	-1.0804	0.1017	0.208696	-0.894726	-1.30661	277667	2
1532	HAUS6	-1.59116	-1.65729	0.10174	0.208696	-0.844071	-1.33375	301598	3
1531	GALNT13	-1.12678	-1.29167	0.101798	0.208696	-0.844032	-1.33369	301771	3
1534	SNRPF	-2.64409	-2.64409	0.101897	0.208696	-0.894599	-1.30642	278205	2
1529	AKR1C4	-0.991349	-0.991349	0.101953	0.208696	-0.89457	-1.30638	278357	2
1528	EDIL3	-0.976693	-0.976693	0.101997	0.208696	-0.894542	-1.30634	278476	2
1533	EXOSC6	-2.55272	-2.55272	0.102022	0.208696	-0.894528	-1.30632	278544	2
1535	CLUAP1	-1.15612	-1.21001	0.102518	0.209574	-0.843549	-1.33293	303904	3
1536	KIF17	-1.01213	-1.15243	0.102603	0.209612	-0.843493	-1.33284	304157	3
1537	DDX24	-1.13931	-0.820741	0.102802	0.209864	-0.802876	-1.34888	325533	4
1538	CD163L1	-1.25088	-1.25088	0.10286	0.209864	-0.894017	-1.30557	280833	2
1539	TAMM41	-0.746531	-0.754182	0.103153	0.210326	-0.802635	-1.34848	326645	4
1540	NOM1	-1.00388	-1.00388	0.103539	0.210744	-0.893605	-1.30497	282687	2
1543	ZNF622	-1.17049	-1.36708	0.10358	0.210744	-0.842858	-1.33184	307054	3
1542	SP140L	-1.19679	-1.19679	0.103585	0.210744	-0.893577	-1.30493	282812	2
1541	STX6	-1.14453	-1.14453	0.103627	0.210744	-0.893548	-1.30489	282927	2
1544	PMM2	-0.98822	-0.865793	0.103706	0.210769	-0.842783	-1.33172	307428	3
1546	DOT1L	-0.989014	-0.989014	0.104081	0.211306	-0.893264	-1.30448	284166	2
1545	LIPT1	-0.850008	-0.852698	0.104167	0.211306	-0.842499	-1.33127	308793	3
1547	MAP3K8	-1.03358	-1.03358	0.104173	0.211306	-0.893207	-1.30439	284417	2
1548	SLC20A1	-1.16041	-1.16041	0.104477	0.211788	-0.893009	-1.3041	285249	2
1549	UCHL5	-1.0119	-1.0119	0.104546	0.21179	-0.892966	-1.30404	285436	2
1550	MKL2	-1.05776	-1.05776	0.104634	0.211831	-0.892909	-1.30396	285676	2
1552	PDE4DIP	-0.939491	-0.815525	0.104783	0.211981	-0.80157	-1.34669	331806	4
1553	NCL	-1.6666	-1.38284	0.104909	0.211981	-0.842016	-1.33051	310992	3
1551	ACTR3	-0.707013	-0.699383	0.104911	0.211981	-0.801485	-1.34654	332209	4
1554	DYRK1A	-1.00166	-1.00166	0.105027	0.211995	-0.892668	-1.30361	286749	2
1555	DENND1B	-1.1072	-1.1072	0.105052	0.211995	-0.892654	-1.30358	286819	2
1556	CAV1	-0.797756	-0.786413	0.105221	0.212073	-0.841818	-1.33019	311917	3
1560	CCDC135	-1.14169	-1.14169	0.105256	0.212073	-0.892526	-1.3034	287376	2
1558	TAF12	-1.66669	-0.992428	0.105364	0.212073	-0.841718	-1.33004	312341	3
1559	UBA3	-1.7147	-1.13823	0.105388	0.212073	-0.841704	-1.33001	312413	3
1561	RNF31	-2.375	-1.30732	0.105436	0.212073	-0.841672	-1.32996	312555	3
1557	SPATA5	-0.958504	-0.964954	0.105496	0.212073	-0.841633	-1.3299	312734	3
1562	NPY2R	-1.0456	-0.917489	0.105869	0.212685	-0.841406	-1.32954	313838	3
1565	SCN11A	-1.22365	-1.22365	0.106108	0.21299	-0.892001	-1.30263	289700	2
1563	FNTB	-1.07073	-1.07073	0.106179	0.21299	-0.891958	-1.30257	289894	2
1564	UCP2	-1.15888	-1.15888	0.106224	0.21299	-0.89193	-1.30253	290017	2
1566	WWC3	-1.10367	-1.10367	0.106315	0.213038	-0.891873	-1.30244	290267	2
1567	ST8SIA1	-0.964953	-0.964953	0.106407	0.213086	-0.891816	-1.30236	290518	2
1568	C10orf76	-1.25888	-1.25888	0.106648	0.213433	-0.89166	-1.30213	291176	2
1569	GSTA4	-0.965186	-0.965186	0.106753	0.213507	-0.891603	-1.30205	291463	2
1570	CYP11B2	-0.955457	-0.955457	0.107024	0.213911	-0.891433	-1.3018	292201	2
1571	ZNF236	-0.758406	-0.69307	0.1071	0.213927	-0.840597	-1.32826	317488	3
1572	POLR2A	-1.44394	-1.44394	0.107232	0.214056	-0.891305	-1.30162	292771	2
1573	NUP133	-1.65297	-1.28388	0.10739	0.214234	-0.840404	-1.32796	318348	3
1574	UBE2K	-0.822748	-0.691872	0.107468	0.214254	-0.799739	-1.34361	340308	4
1575	MFAP1	-0.885061	-0.788618	0.107666	0.214291	-0.840228	-1.32768	319166	3
1577	ZNF79	-1.10681	-1.10681	0.107686	0.214291	-0.891036	-1.30122	294009	2
1579	GLIS2	-1.14181	-1.14181	0.107706	0.214291	-0.891021	-1.3012	294065	2
1580	TMCO2	-1.49317	-1.34973	0.107849	0.214291	-0.840114	-1.3275	319710	3
1576	SERPINA10	-0.962795	-0.962795	0.107855	0.214291	-0.890936	-1.30108	294470	2
1578	G6PD	-1.00405	-1.1182	0.107896	0.214291	-0.840086	-1.32746	319848	3
1582	CDK13	-0.982357	-0.982357	0.108031	0.214327	-0.890837	-1.30093	294952	2
1583	UPF1	-1.70246	-1.70246	0.108105	0.214327	-0.890794	-1.30087	295153	2
1581	UQCRH	-0.797811	-0.653679	0.108119	0.214327	-0.799299	-1.34287	342369	4
1585	ZNF682	-0.996765	-0.996765	0.108496	0.214789	-0.890553	-1.30052	296221	2
1586	MPHOSPH8	-1.00875	-1.00875	0.108538	0.214789	-0.890525	-1.30048	296335	2
1587	PDIK1L	-1.03825	-1.03825	0.108582	0.214789	-0.890496	-1.30043	296456	2
1591	RBM14	-1.54891	-1.78167	0.108661	0.214789	-0.83959	-1.32667	322116	3
1589	UTP18	-1.07027	-1.07027	0.10874	0.214789	-0.890397	-1.30029	296887	2
1590	RBM7	-1.09685	-1.09685	0.108832	0.214789	-0.89034	-1.30021	297139	2
1588	IFLTD1	-0.969809	-1.05593	0.10888	0.214789	-0.839461	-1.32647	322766	3
1584	KRI1	-1.00121	-0.96731	0.1089	0.214789	-0.839447	-1.32645	322823	3
1592	ISG20L2	-1.47345	-1.42183	0.109181	0.215209	-0.839258	-1.32615	323657	3
1593	VPS4B	-0.788892	-0.776159	0.109381	0.215318	-0.83912	-1.32593	324251	3
1595	TUBGCP5	-0.995298	-1.0279	0.109414	0.215318	-0.798447	-1.34144	346471	4
1596	KIAA1841	-1.07783	-1.07783	0.109473	0.215318	-0.889943	-1.29963	298889	2
1594	PCYT1A	-1.87757	-0.999548	0.10951	0.215318	-0.839035	-1.3258	324634	3
1599	PIAS4	-1.08893	-1.08893	0.109886	0.215809	-0.889701	-1.29927	300015	2
1598	ARL14EP	-1.0079	-1.0079	0.109966	0.215809	-0.889659	-1.29921	300233	2
1597	CEP192	-1.12042	-0.971157	0.109967	0.215809	-0.838737	-1.32532	325986	3
1600	PAXIP1	-1.02277	-0.979674	0.110234	0.2162	-0.838567	-1.32506	326780	3
1601	ELOVL2	-1.01157	-1.01157	0.110445	0.216362	-0.88936	-1.29878	301543	2
1602	STX16	-1.10708	-1.10708	0.110475	0.216362	-0.889346	-1.29875	301623	2
1603	SGCG	-1.13859	-1.13859	0.110524	0.216362	-0.889318	-1.29871	301757	2
1604	LEO1	-0.787875	-0.724696	0.110896	0.216955	-0.838141	-1.32438	328740	3
1607	INTS2	-1.79747	-1.68538	0.111214	0.217335	-0.837942	-1.32407	329685	3
1605	ENSA	-1.05257	-0.846222	0.111285	0.217335	-0.8379	-1.324	329895	3
1606	TPI1	-1.17309	-1.17309	0.111298	0.217335	-0.888849	-1.29803	303870	2
1608	ZCCHC8	-0.813659	-0.808927	0.111387	0.217374	-0.837829	-1.32389	330196	3
1609	YIPF1	-0.661901	-0.548065	0.111514	0.217487	-0.797042	-1.33908	353119	4
1610	TBCD	-1.54585	-1.23867	0.11163	0.217577	-0.837672	-1.32364	330916	3
1611	ILF2	-1.32093	-1.29812	0.111727	0.217632	-0.837616	-1.32355	331204	3
1612	SERPINB2	-0.960264	-0.960264	0.112038	0.218018	-0.888409	-1.29739	305892	2
1613	MPP7	-1.00081	-1.00081	0.112107	0.218018	-0.888367	-1.29732	306080	2
1614	SPIRE1	-1.0495	-1.0495	0.112133	0.218018	-0.888353	-1.2973	306152	2
1615	DCLRE1B	-1.48534	-1.48534	0.112476	0.218549	-0.888154	-1.29701	307088	2
1617	HAO2	-1.16897	-1.33339	0.112709	0.218741	-0.836991	-1.32257	334117	3
1616	KIAA1009	-0.954028	-0.954028	0.112714	0.218741	-0.888012	-1.29681	307738	2
1618	RANBP2	-1.13455	-1.13455	0.113055	0.219266	-0.887813	-1.29652	308667	2
1619	AIM2	-0.934544	-0.934544	0.11315	0.219315	-0.887756	-1.29643	308927	2
1621	USE1	-2.09487	-2.09487	0.113298	0.219424	-0.887657	-1.29629	309331	2
1620	ZCCHC11	-1.08563	-0.98683	0.113346	0.219424	-0.836594	-1.32194	336003	3
1622	AIM1	-0.949445	-0.949445	0.113679	0.219934	-0.88743	-1.29596	310372	2
1626	HMGXB3	-1.47131	-1.47131	0.113957	0.220333	-0.88726	-1.29571	311130	2
1628	GEMIN8	-2.06744	-2.06744	0.114068	0.220333	-0.887189	-1.2956	311433	2
1625	PRSS3	-1.15901	-1.15901	0.114136	0.220333	-0.887146	-1.29554	311620	2
1623	KIF20B	-0.998063	-0.998063	0.114215	0.220333	-0.887103	-1.29548	311836	2
1627	EMC7	-1.65123	-1.53103	0.114277	0.220333	-0.836007	-1.32101	338763	3
1624	TPH2	-1.03995	-1.03995	0.114307	0.220333	-0.887047	-1.2954	312085	2
1629	CHMP5	-0.944564	-0.811996	0.114609	0.220693	-0.835799	-1.32068	339747	3
1630	CXXC1	-1.54818	-1.54818	0.114634	0.220693	-0.886862	-1.29513	312978	2
1632	MIS18BP1	-1.36566	-1.50944	0.114753	0.22073	-0.835712	-1.32054	340176	3
1631	GABPA	-1.03957	-0.736641	0.114793	0.22073	-0.835685	-1.3205	340295	3
1634	OR1I1	-0.945048	-0.769389	0.114881	0.220746	-0.835628	-1.32041	340555	3
1633	C1orf162	-0.763791	-0.726779	0.115106	0.220746	-0.835486	-1.32019	341221	3
1635	HBE1	-0.968993	-0.968993	0.115129	0.220746	-0.88655	-1.29467	314331	2
1637	CUL5	-1.2504	-1.2504	0.115152	0.220746	-0.886536	-1.29465	314392	2
1636	NUP214	-1.267	-0.992795	0.115153	0.220746	-0.794713	-1.33517	364644	4
1638	ERLIN1	-0.997632	-0.997632	0.115371	0.221023	-0.886408	-1.29446	314990	2
1639	DSPP	-0.997753	-0.997753	0.115439	0.221023	-0.886365	-1.2944	315176	2
1640	DGKB	-0.991148	-0.991148	0.115656	0.221304	-0.886237	-1.29421	315769	2
1643	CHMP6	-1.71462	-1.71462	0.115783	0.221325	-0.886167	-1.29411	316115	2
1642	SEMA4D	-1.14727	-1.14727	0.115855	0.221325	-0.886124	-1.29405	316312	2
1641	MAS1	-1.10807	-1.10807	0.115878	0.221325	-0.88611	-1.29403	316376	2
1644	C15orf54	-1.10745	-1.10745	0.116087	0.221588	-0.885996	-1.29386	316946	2
1645	DNAH10	-0.959665	-0.959665	0.116239	0.221613	-0.885911	-1.29374	317361	2
1647	SLC10A7	-1.28438	-1.28438	0.116266	0.221613	-0.885897	-1.29372	317434	2
1646	H2AFY2	-0.991127	-0.991127	0.116311	0.221613	-0.885868	-1.29368	317559	2
1648	DIMT1	-1.21583	-1.24114	0.116453	0.221748	-0.834649	-1.31886	345214	3
1649	STAM	-1.06959	-1.06959	0.116558	0.221813	-0.885726	-1.29347	318232	2
1650	SF3B2	-2.50724	-2.50724	0.116629	0.221814	-0.885684	-1.29341	318426	2
1651	TCTE1	-0.938599	-0.938599	0.116795	0.221996	-0.885584	-1.29326	318880	2
1652	BIRC5	-1.32599	-1.3231	0.116974	0.222201	-0.834322	-1.31835	346759	3
1653	YARS2	-1.04514	-0.983622	0.117141	0.222384	-0.834223	-1.31819	347254	3
1654	ATAD5	-0.922355	-0.922355	0.117276	0.222506	-0.885286	-1.29283	320193	2
1655	PPIH	-0.965027	-0.991927	0.117413	0.222631	-0.79328	-1.33276	371799	4
1656	EPHA3	-0.825403	-0.795341	0.117602	0.222856	-0.833939	-1.31774	348622	3
1657	RFWD2	-1.07369	-1.07369	0.118116	0.223695	-0.88479	-1.2921	322487	2
1660	DIEXF	-0.92458	-0.92458	0.118363	0.223727	-0.884648	-1.29189	323159	2
1664	MEPE	-1.44111	-1.44111	0.118432	0.223727	-0.884605	-1.29183	323349	2
1661	OR5B12	-0.868118	-0.926025	0.118438	0.223727	-0.833428	-1.31694	351098	3
1659	RAB3GAP1	-1.0441	-0.890097	0.118485	0.223727	-0.8334	-1.31689	351239	3
1663	PAPD4	-1.14917	-1.14917	0.118607	0.223727	-0.884506	-1.29169	323826	2
1658	TMOD2	-0.803298	-0.835639	0.118611	0.223727	-0.833314	-1.31676	351611	3
1662	ZNF658	-0.943224	-0.958718	0.118633	0.223727	-0.792513	-1.33147	375661	4
1665	C18orf21	-1.46679	-1.46679	0.118797	0.223902	-0.884392	-1.29152	324344	2
1666	NOLC1	-1.00519	-0.709287	0.119014	0.224061	-0.833059	-1.31635	352805	3
1667	KLKB1	-1.12808	-1.12808	0.119024	0.224061	-0.88425	-1.29131	324966	2
1668	SLC10A5	-1.16858	-1.16858	0.119095	0.224061	-0.884208	-1.29125	325158	2
1669	PDZRN3	-0.975017	-0.975017	0.119374	0.224452	-0.884051	-1.29102	325921	2
1671	UBE2C	-0.993176	-1.02846	0.119503	0.224526	-0.791959	-1.33054	378418	4
1670	SMIM18	-0.934211	-0.934211	0.119577	0.224526	-0.883938	-1.29086	326476	2
1672	C6orf48	-1.08557	-1.08557	0.119628	0.224526	-0.883909	-1.29081	326614	2
1675	CRCP	-1.22251	-1.22251	0.119814	0.224655	-0.883796	-1.29065	327122	2
1674	VARS	-1.00245	-1.11975	0.119843	0.224655	-0.832534	-1.31552	355263	3
1673	SAR1B	-0.926519	-0.926519	0.119911	0.224655	-0.883739	-1.29057	327387	2
1679	INTS1	-1.04038	-1.04038	0.120073	0.224807	-0.88364	-1.29042	327828	2
1680	MAX	-1.23158	-1.23158	0.120163	0.224807	-0.883583	-1.29034	328075	2
1678	TAF8	-0.948987	-0.938753	0.120308	0.224807	-0.83225	-1.31507	356642	3
1677	GTF2H1	-1.27055	-0.750847	0.120331	0.224807	-0.832236	-1.31505	356711	3
1676	KIAA1429	-1.02655	-0.717795	0.12035	0.224807	-0.832221	-1.31503	356768	3
1681	C10orf120	-0.951469	-0.951469	0.120513	0.224977	-0.883384	-1.29005	329031	2
1683	UPF3A	-0.911766	-0.911766	0.120661	0.225082	-0.883299	-1.28992	329435	2
1684	TYW1	-1.41034	-1.41034	0.12078	0.225082	-0.883228	-1.28982	329758	2
1682	WDR59	-0.780697	-0.728332	0.120785	0.225082	-0.831952	-1.3146	358055	3
1686	WLS	-0.912824	-0.912824	0.121047	0.225385	-0.883072	-1.28959	330489	2
1685	PPP1R8	-0.864102	-0.850959	0.121152	0.225385	-0.831724	-1.31424	359145	3
1689	MIS18A	-1.70209	-1.604	0.121201	0.225385	-0.831696	-1.3142	359291	3
1687	FDX1L	-1.04911	-1.04911	0.12126	0.225385	-0.882958	-1.28943	331069	2
1688	HPCA	-1.18901	-1.18901	0.121306	0.225385	-0.88293	-1.28938	331195	2
1690	OGT	-2.09496	-2.09496	0.121481	0.225577	-0.882831	-1.28924	331674	2
1691	LPCAT2	-0.981251	-0.981251	0.121662	0.225779	-0.882731	-1.28909	332167	2
1693	MRPL42	-1.08372	-1.08372	0.122063	0.226345	-0.882504	-1.28876	333262	2
1692	CASC3	-0.89486	-0.842438	0.122111	0.226345	-0.831142	-1.31332	361987	3
1694	PGM3	-0.93118	-0.979751	0.1222	0.226376	-0.831086	-1.31323	362250	3
1695	ATP6V0B	-1.20316	-1.20316	0.122582	0.226951	-0.882178	-1.28829	334680	2
1696	CTSC	-1.16217	-1.16217	0.122698	0.227031	-0.882107	-1.28818	334995	2
1697	ORC3	-0.983821	-0.983821	0.122897	0.227085	-0.881993	-1.28802	335540	2
1700	SMARCC1	-1.08346	-1.08346	0.122994	0.227085	-0.881936	-1.28793	335803	2
1701	DHX37	-1.37735	-1.15392	0.123059	0.227085	-0.83056	-1.3124	364799	3
1698	SLC35E3	-1.00142	-1.00142	0.123066	0.227085	-0.881894	-1.28787	336000	2
1699	FAM179B	-1.06097	-1.06097	0.123089	0.227085	-0.881879	-1.28785	336062	2
1702	SLC16A12	-1.07675	-1.07675	0.123164	0.22709	-0.881837	-1.28779	336267	2
1703	ZBTB14	-0.923973	-0.923973	0.12324	0.227097	-0.881794	-1.28773	336476	2
1704	RPLP2	-0.993013	-0.993013	0.123394	0.227159	-0.881709	-1.2876	336895	2
1705	HAUS5	-1.71903	-1.71903	0.123418	0.227159	-0.881695	-1.28758	336962	2
1707	FUZ	-1.05441	-1.05441	0.12356	0.227192	-0.88161	-1.28746	337348	2
1706	RSAD2	-0.918745	-0.918745	0.123581	0.227192	-0.881596	-1.28744	337407	2
1708	KIAA0319L	-1.3824	-1.3824	0.123703	0.227284	-0.881525	-1.28733	337740	2
1709	RAB5C	-1.20895	-1.20895	0.123856	0.227432	-0.881439	-1.28721	338158	2
1710	UGGT2	-0.840597	-0.880871	0.124052	0.227561	-0.829964	-1.31146	367741	3
1711	SLC26A5	-0.889438	-0.889438	0.124086	0.227561	-0.881297	-1.287	338786	2
1712	SLC4A7	-0.929766	-1.03473	0.124144	0.227561	-0.789049	-1.32565	393114	4
1714	USP10	-0.975248	-0.975248	0.124363	0.227733	-0.881127	-1.28675	339543	2
1713	OR1J2	-0.827572	-0.66724	0.124383	0.227733	-0.829751	-1.31113	368722	3
1715	FMO4	-1.06327	-1.06327	0.124571	0.227944	-0.880999	-1.28657	340109	2
1716	TUBAL3	-1.20377	-1.20377	0.124661	0.227977	-0.880943	-1.28648	340356	2
1717	ATG4C	-1.14478	-1.37652	0.12474	0.227988	-0.82951	-1.31074	369781	3
1725	COQ5	-1.26946	-1.26946	0.124896	0.227993	-0.880815	-1.2863	340997	2
1719	NUFIP1	-0.830682	-0.755149	0.125005	0.227993	-0.788524	-1.32477	395839	4
1722	RNF214	-0.968981	-0.968981	0.125009	0.227993	-0.880744	-1.28619	341306	2
1726	OR4L1	-1.29422	-1.29422	0.125167	0.227993	-0.880659	-1.28607	341737	2
1720	CNOT4	-0.900277	-0.900277	0.125235	0.227993	-0.880616	-1.28601	341923	2
1721	SERPINI2	-0.958423	-0.958423	0.125303	0.227993	-0.880573	-1.28594	342107	2
1718	ARF1	-0.842464	-0.729994	0.125339	0.227993	-0.788311	-1.32441	396898	4
1724	ERBB2IP	-1.20612	-1.20612	0.125353	0.227993	-0.880545	-1.2859	342244	2
1723	FAR1	-1.05594	-1.05594	0.125396	0.227993	-0.880517	-1.28586	342363	2
1727	TRPC1	-0.9903	-0.9903	0.125778	0.228555	-0.880304	-1.28555	343405	2
1728	BET1L	-0.891419	-0.891419	0.125971	0.228719	-0.88019	-1.28538	343931	2
1729	GEMIN7	-0.979285	-0.979285	0.126014	0.228719	-0.880162	-1.28534	344050	2
1730	KIAA1551	-0.897953	-0.897953	0.126142	0.228819	-0.880091	-1.28524	344398	2
1731	SCEL	-0.955085	-0.955085	0.126805	0.229801	-0.879722	-1.2847	346209	2
1735	GINS4	-1.41291	-1.3868	0.126921	0.229801	-0.828185	-1.30865	376245	3
1732	UBE2G2	-1.03962	-1.03962	0.127024	0.229801	-0.879594	-1.28451	346808	2
1734	GEMIN6	-1.07353	-1.19058	0.127084	0.229801	-0.787225	-1.32259	402425	4
1737	COG7	-1.63614	-1.56499	0.127111	0.229801	-0.828072	-1.30847	376810	3
1736	RAE1	-1.3165	-1.55363	0.127178	0.229801	-0.828034	-1.30841	377009	3
1733	SMARCD2	-1.05451	-1.05451	0.127196	0.229801	-0.879495	-1.28437	347276	2
1739	SEH1L	-1.27888	-1.27888	0.127472	0.230131	-0.879338	-1.28414	348029	2
1738	RASGRF2	-1.07496	-1.07496	0.127525	0.230131	-0.87931	-1.2841	348174	2
1740	RASGRP4	-1.18776	-1.18776	0.12764	0.230207	-0.879239	-1.28399	348490	2
1741	ZNF610	-0.955891	-0.955891	0.127733	0.230242	-0.879182	-1.28391	348743	2
1742	CNOT2	-1.02453	-1.02453	0.127976	0.230461	-0.87904	-1.2837	349405	2
1743	RTKN2	-1.34859	-1.34859	0.128001	0.230461	-0.879026	-1.28368	349475	2
1744	ATG13	-1.08434	-1.08434	0.128202	0.230691	-0.878913	-1.28352	350024	2
1745	SRP9	-0.840535	-0.866866	0.128371	0.230863	-0.82731	-1.30727	380546	3
1746	ZNF664	-1.07698	-1.07698	0.128472	0.23091	-0.878756	-1.28329	350759	2
1747	OVCH1	-1.03163	-1.03163	0.128561	0.230938	-0.8787	-1.28321	351002	2
1755	TP53BP1	-1.36241	-1.36241	0.1288	0.231189	-0.878558	-1.283	351657	2
1750	IMMT	-0.928639	-0.928639	0.128958	0.231189	-0.878473	-1.28288	352088	2
1748	ATG7	-0.672524	-0.676139	0.129128	0.231189	-0.826855	-1.30655	382790	3
1754	CASD1	-1.23097	-1.23097	0.129154	0.231189	-0.878359	-1.28271	352621	2
1753	ZMAT5	-1.20429	-1.20429	0.129204	0.231189	-0.878331	-1.28267	352759	2
1749	CPAMD8	-1.06947	-0.729129	0.129207	0.231189	-0.826813	-1.30648	383022	3
1752	LYPD1	-1.18549	-1.18549	0.12923	0.231189	-0.878316	-1.28265	352830	2
1751	ZNF555	-0.937226	-1.01203	0.129289	0.231189	-0.82677	-1.30642	383267	3
1757	PFDN6	-1.33517	-1.36925	0.129519	0.231462	-0.826628	-1.30619	383949	3
1756	TM2D1	-0.811008	-0.662427	0.129589	0.231462	-0.826586	-1.30612	384156	3
1758	FOXP1	-0.923643	-0.923643	0.129876	0.231843	-0.877947	-1.28211	354594	2
1759	CWC25	-0.960624	-0.740072	0.130033	0.23199	-0.826316	-1.3057	385470	3
1763	SLCO1A2	-0.964646	-0.964646	0.130283	0.232054	-0.87772	-1.28178	355704	2
1765	TMEM19	-1.0116	-1.0116	0.130359	0.232054	-0.877678	-1.28171	355913	2
1760	METTL3	-0.84884	-0.83753	0.130461	0.232054	-0.785174	-1.31914	413118	4
1761	SNRNP70	-1.36188	-0.850285	0.130474	0.232054	-0.82606	-1.30529	386780	3
1762	DHRS1	-0.875186	-0.875186	0.130493	0.232054	-0.877607	-1.28161	356279	2
1764	PPP1CC	-0.989223	-0.989223	0.130512	0.232054	-0.877592	-1.28159	356329	2
1766	ISCA2	-0.966885	-0.966885	0.130751	0.232347	-0.877465	-1.2814	356982	2
1767	ABCA2	-0.988123	-0.988123	0.13085	0.232391	-0.877408	-1.28132	357252	2
1768	TAF3	-0.893307	-0.893307	0.131081	0.232605	-0.877266	-1.28111	357883	2
1769	MMS22L	-1.2438	-1.15325	0.131118	0.232605	-0.825677	-1.30469	388688	3
1770	B3GNT5	-0.945619	-0.945619	0.131282	0.232763	-0.877152	-1.28095	358431	2
1772	MND1	-0.939817	-0.939817	0.131532	0.233036	-0.87701	-1.28074	359116	2
1771	BAZ2A	-0.76004	-0.800532	0.131611	0.233036	-0.825379	-1.30422	390149	3
1773	C3orf55	-0.982986	-0.982986	0.131658	0.233036	-0.876939	-1.28064	359458	2
1774	TSPAN16	-1.13504	-1.13504	0.131823	0.233197	-0.87684	-1.28049	359910	2
1775	BBS2	-1.02112	-1.02112	0.131928	0.233252	-0.876783	-1.28041	360197	2
1778	RABL5	-0.950243	-0.950243	0.132395	0.23389	-0.876528	-1.28004	361472	2
1777	TECR	-0.931196	-0.931196	0.132471	0.23389	-0.876485	-1.27997	361678	2
1776	TSPAN5	-0.880676	-0.880676	0.132574	0.23389	-0.876428	-1.27989	361961	2
1779	FOXE3	-1.05841	-1.05841	0.132651	0.23389	-0.876386	-1.27983	362169	2
1780	HYI	-1.07396	-1.10067	0.132662	0.23389	-0.82474	-1.30321	393265	3
1781	CHTF8	-1.27075	-1.26685	0.133052	0.234446	-0.824513	-1.30285	394421	3
1783	CENPBD1	-1.27635	-1.27635	0.133211	0.23451	-0.876074	-1.27937	363700	2
1782	DZIP1	-0.984801	-0.984801	0.133238	0.23451	-0.876059	-1.27935	363772	2
1784	FGFR1OP	-1.04795	-1.04795	0.133329	0.234539	-0.876017	-1.27929	364020	2
1791	CCDC104	-1.09528	-1.09528	0.13343	0.234558	-0.87596	-1.27921	364298	2
1788	GLRX2	-0.954256	-0.954256	0.133583	0.234558	-0.875875	-1.27908	364714	2
1789	RNF216	-0.927806	-0.971534	0.133677	0.234558	-0.82413	-1.30224	396274	3
1786	KIAA0196	-0.835292	-0.828549	0.133702	0.234558	-0.824116	-1.30222	396348	3
1790	DLG1	-0.983249	-0.983249	0.133793	0.234558	-0.875761	-1.27892	365289	2
1785	BRCA1	-0.931036	-0.736924	0.133826	0.234558	-0.824045	-1.30211	396716	3
1787	FIGF	-0.941069	-0.941069	0.133862	0.234558	-0.875719	-1.27885	365477	2
1792	NOX3	-0.857099	-0.767813	0.133976	0.234589	-0.823959	-1.30197	397159	3
1794	DDX51	-1.23711	-0.944864	0.13409	0.234589	-0.823888	-1.30186	397498	3
1793	CARD9	-0.926362	-0.926362	0.134105	0.234589	-0.875577	-1.27865	366139	2
1795	OR4A47	-1.26496	-1.26496	0.134179	0.234589	-0.875534	-1.27858	366342	2
1796	SLC35A2	-1.29016	-1.07206	0.134402	0.234848	-0.823704	-1.30157	398423	3
1797	NUP160	-1.32777	-1.34193	0.134686	0.235214	-0.823534	-1.3013	399266	3
1798	CBFA2T2	-0.905943	-0.905943	0.13479	0.235221	-0.875193	-1.27809	368010	2
1799	C8orf48	-1.23412	-1.23412	0.13484	0.235221	-0.875165	-1.27805	368146	2
1800	BNIP1	-1.10073	-1.10073	0.135011	0.235389	-0.875066	-1.2779	368614	2
1801	ROS1	-1.22674	-1.22674	0.135333	0.235818	-0.874881	-1.27763	369492	2
1804	RSPH3	-1.04738	-1.04738	0.135462	0.23584	-0.87481	-1.27753	369844	2
1807	PALD1	-1.20467	-1.3355	0.135559	0.23584	-0.823037	-1.30052	401854	3
1803	USP15	-0.964184	-0.964184	0.135746	0.23584	-0.874654	-1.2773	370620	2
1806	DOCK2	-1.15489	-1.15489	0.13577	0.23584	-0.87464	-1.27728	370685	2
1802	COMMD4	-1.03425	-0.886344	0.135781	0.23584	-0.822909	-1.30031	402512	3
1805	MCFD2	-1.14569	-1.14569	0.135796	0.23584	-0.874626	-1.27726	370756	2
1808	NPTN	-0.912421	-0.912421	0.136144	0.236198	-0.874413	-1.27695	371706	2
1809	COX10	-0.890079	-1.01592	0.136152	0.236198	-0.822696	-1.29998	403612	3
1810	MBD6	-0.955971	-0.955971	0.136325	0.236366	-0.874313	-1.2768	372200	2
1811	KIAA0040	-1.16846	-1.16846	0.136554	0.236633	-0.874186	-1.27661	372825	2
1812	MTMR3	-0.892421	-0.880483	0.136766	0.236871	-0.822341	-1.29942	405432	3
1814	TSEN54	-0.965198	-0.965198	0.13689	0.236936	-0.874001	-1.27635	373743	2
1815	AVL9	-1.12782	-1.01958	0.137007	0.236936	-0.822199	-1.29919	406144	3
1813	OR4F6	-0.953198	-0.953198	0.13703	0.236936	-0.873916	-1.27622	374127	2
1816	MRPS9	-1.01899	-1.01899	0.137394	0.237434	-0.873717	-1.27593	375120	2
1817	HMBOX1	-0.835801	-0.686327	0.137502	0.237467	-0.821901	-1.29872	407612	3
1818	TAPBP	-0.887857	-0.887857	0.137616	0.237467	-0.873589	-1.27574	375725	2
1819	NFATC2IP	-0.933163	-0.933163	0.13764	0.237467	-0.873575	-1.27572	375791	2
1820	C1orf50	-0.963638	-1.04522	0.137743	0.237513	-0.821759	-1.2985	408326	3
1821	ELSPBP1	-1.26744	-1.26744	0.137924	0.237696	-0.873419	-1.2755	376568	2
1822	VPS45	-1.0863	-1.0863	0.13805	0.237783	-0.873348	-1.27539	376912	2
1824	ANAPC7	-1.1345	-1.1345	0.13845	0.238254	-0.873121	-1.27506	378004	2
1823	L3MBTL4	-0.819893	-0.755881	0.138476	0.238254	-0.821333	-1.29782	410499	3
1825	MAPKAPK5	-1.16755	-0.962	0.138636	0.238399	-0.821234	-1.29767	410974	3
1826	PPP2R1A	-1.0069	-1.13941	0.13885	0.238637	-0.821106	-1.29747	411609	3
1827	MCU	-0.867619	-0.867619	0.138938	0.238656	-0.872851	-1.27467	379334	2
1828	OSBPL2	-1.17246	-1.17246	0.139264	0.239086	-0.872667	-1.2744	380224	2
1829	FLI1	-0.848275	-0.848275	0.139502	0.239276	-0.872525	-1.27419	380874	2
1831	PDCD6IP	-1.06876	-1.06876	0.139622	0.239276	-0.872454	-1.27409	381204	2
1833	DCTN2	-1.54357	-1.41834	0.13972	0.239276	-0.820599	-1.29666	414188	3
1830	PELI1	-1.06233	-1.06233	0.139753	0.239276	-0.872383	-1.27398	381561	2
1832	TIMM44	-1.1671	-1.4037	0.139756	0.239276	-0.820581	-1.29664	414293	3
1834	MUC12	-0.839773	-0.839773	0.139904	0.2394	-0.872298	-1.27386	381973	2
1835	ORC1	-1.21205	-1.21205	0.140173	0.239729	-0.872141	-1.27363	382706	2
1836	ZFR	-1.00213	-1.15143	0.14026	0.239747	-0.820283	-1.29616	415788	3
1837	TXNDC17	-1.00816	-1.00816	0.140435	0.239916	-0.871999	-1.27342	383422	2
1838	HTRA2	-0.774248	-0.766721	0.14053	0.239948	-0.779126	-1.30898	445002	4
1839	DNAJC13	-0.983156	-0.983156	0.140836	0.24034	-0.871772	-1.27309	384518	2
1841	ZNHIT3	-0.984657	-0.984657	0.140987	0.240378	-0.871687	-1.27297	384929	2
1840	ZNF670	-0.856257	-0.856257	0.141012	0.240378	-0.871673	-1.27295	384997	2
1842	TMEM27	-0.888232	-0.888232	0.141168	0.240419	-0.871588	-1.27282	385424	2
1843	GPR149	-1.21111	-1.21111	0.141189	0.240419	-0.871574	-1.2728	385480	2
1846	BCL10	-1.15428	-1.15428	0.141415	0.240506	-0.871446	-1.27261	386097	2
1845	ZNF441	-1.02157	-1.02157	0.141441	0.240506	-0.871432	-1.27259	386168	2
1844	GPCPD1	-0.957845	-0.957845	0.14147	0.240506	-0.871417	-1.27257	386247	2
1847	MNAT1	-0.839612	-0.809589	0.141769	0.240884	-0.819417	-1.2948	420261	3
1849	NTNG1	-1.02076	-1.02076	0.142042	0.241156	-0.871105	-1.27212	387809	2
1851	CSNK2A1	-1.10363	-1.2042	0.142112	0.241156	-0.819218	-1.29448	421278	3
1848	STK32B	-1.0986	-0.873754	0.14217	0.241156	-0.81919	-1.29444	421450	3
1850	FBXW5	-1.13215	-1.13215	0.142236	0.241156	-0.870992	-1.27195	388340	2
1852	PMP2	-1.07779	-1.07779	0.142442	0.241375	-0.870878	-1.27178	388902	2
1854	TBC1D20	-0.793133	-0.866489	0.142741	0.241593	-0.818863	-1.29392	423144	3
1853	XRCC6	-1.14422	-0.766063	0.142747	0.241593	-0.777849	-1.30683	452023	4
1855	TOMM22	-1.20529	-1.54524	0.142802	0.241593	-0.818829	-1.29387	423323	3
1856	ADAMTS3	-0.903731	-0.903731	0.142911	0.241648	-0.870608	-1.27139	390183	2
1857	TOP1	-1.56708	-1.56708	0.143032	0.241723	-0.870537	-1.27129	390514	2
1859	LMOD3	-0.97306	-0.938312	0.143378	0.242148	-0.818494	-1.29334	425031	3
1858	C3orf14	-0.859721	-0.859721	0.143438	0.242148	-0.87031	-1.27096	391622	2
1860	TCP11L2	-0.941911	-0.941911	0.14381	0.242645	-0.870097	-1.27064	392636	2
1861	GJA10	-0.925933	-0.925933	0.143907	0.242672	-0.87004	-1.27056	392902	2
1862	PDZD9	-0.969276	-0.969276	0.14398	0.242672	-0.869998	-1.2705	393101	2
1864	POLR1D	-1.15023	-1.39544	0.144143	0.24273	-0.818054	-1.29264	427299	3
1863	MUC20	-1.09578	-1.29151	0.14417	0.24273	-0.81804	-1.29262	427378	3
1865	FBXO7	-1.39564	-1.39564	0.144384	0.242961	-0.869771	-1.27017	394203	2
1868	USP25	-1.04994	-1.04994	0.144568	0.243115	-0.869671	-1.27002	394707	2
1870	UTP14A	-1.28027	-1.28027	0.144704	0.243115	-0.8696	-1.26992	395079	2
1866	TIA1	-0.920479	-0.599105	0.144788	0.243115	-0.817685	-1.29206	429211	3
1867	DHODH	-0.909016	-0.909016	0.144836	0.243115	-0.869529	-1.26982	395438	2
1869	FCGR1A	-1.05307	-1.16536	0.144862	0.243115	-0.817642	-1.29199	429432	3
1871	RHEB	-1.27889	-1.27889	0.145022	0.243253	-0.86943	-1.26967	395946	2
1872	KCNJ8	-0.875131	-0.875131	0.145138	0.243317	-0.869373	-1.26959	396263	2
1873	MLKL	-1.26289	-1.26289	0.145311	0.243477	-0.869274	-1.26944	396734	2
1874	CHD1	-0.692432	-0.657026	0.145552	0.243751	-0.817245	-1.29136	431476	3
1875	CRYZL1	-0.973897	-0.973897	0.145659	0.2438	-0.869089	-1.26917	397684	2
1876	SLC31A2	-0.940115	-0.938195	0.145752	0.243826	-0.817131	-1.29118	432070	3
1886	DPP4	-1.25552	-1.25552	0.146271	0.243989	-0.868763	-1.2687	399355	2
1879	SYCP2L	-0.835052	-0.835052	0.146298	0.243989	-0.868749	-1.26867	399430	2
1882	CD164	-0.947486	-0.947486	0.146329	0.243989	-0.868734	-1.26865	399515	2
1877	CLLU1	-0.904682	-0.616037	0.14644	0.243989	-0.816748	-1.29058	434108	3
1880	SMIM21	-0.935707	-0.849703	0.146468	0.243989	-0.816734	-1.29056	434193	3
1881	TMEM71	-0.911766	-0.911766	0.146489	0.243989	-0.868649	-1.26853	399951	2
1884	FAM111A	-0.903591	-0.988619	0.146544	0.243989	-0.816691	-1.29049	434416	3
1883	SEC63	-0.963561	-0.963561	0.14655	0.243989	-0.868621	-1.26849	400119	2
1878	MED15	-1.03208	-0.643125	0.146617	0.243989	-0.816649	-1.29042	434633	3
1885	GJE1	-1.12088	-1.12088	0.146626	0.243989	-0.868578	-1.26843	400326	2
1887	SCN1A	-1.02381	-0.934965	0.146896	0.244308	-0.816493	-1.29018	435460	3
1888	ELMOD1	-0.879807	-0.848823	0.147099	0.244357	-0.816379	-1.29	436062	3
1890	SNAPC4	-1.61641	-1.2528	0.147145	0.244357	-0.816351	-1.28995	436198	3
1889	RBM33	-0.901676	-0.901676	0.147159	0.244357	-0.868294	-1.26801	401781	2
1891	IVNS1ABP	-0.888199	-0.888199	0.147424	0.244438	-0.868152	-1.2678	402505	2
1892	KIAA1107	-1.12175	-1.12175	0.147454	0.244438	-0.868138	-1.26778	402585	2
1893	LGALS14	-1.17373	-1.17373	0.147506	0.244438	-0.86811	-1.26774	402728	2
1894	SLC36A1	-1.18112	-1.18112	0.147534	0.244438	-0.868096	-1.26772	402805	2
1895	STX18	-1.44262	-1.44262	0.147597	0.244438	-0.868067	-1.26768	402976	2
1897	EXO1	-1.50541	-1.42159	0.147788	0.244534	-0.815981	-1.28937	438104	3
1896	TMEM131	-0.830838	-0.830838	0.147811	0.244534	-0.867954	-1.26751	403560	2
1898	C17orf47	-0.588662	-0.590169	0.148041	0.244786	-0.81584	-1.28914	438854	3
1905	ZZZ3	-0.942332	-1.02005	0.148143	0.244819	-0.774689	-1.30153	469109	4
1909	TMEM245	-1.2473	-1.2473	0.148217	0.244819	-0.867727	-1.26718	404669	2
1899	ATG16L1	-0.777889	-0.589978	0.148445	0.244819	-0.815612	-1.28878	440052	3
1906	FEZ1	-1.04807	-1.04807	0.148523	0.244819	-0.867556	-1.26693	405505	2
1903	ARPC4	-0.862356	-0.912971	0.148622	0.244819	-0.815513	-1.28863	440577	3
1907	LNP1	-1.05537	-1.05537	0.148647	0.244819	-0.867485	-1.26683	405842	2
1900	GCLC	-0.710266	-0.697531	0.1487	0.244819	-0.81547	-1.28856	440807	3
1901	OFD1	-0.807235	-0.754639	0.148828	0.244819	-0.815399	-1.28845	441189	3
1910	PSMD6	-1.47636	-1.47636	0.148863	0.244819	-0.867358	-1.26664	406434	2
1911	GPS2	-1.53624	-1.53624	0.148917	0.244819	-0.867329	-1.2666	406581	2
1904	NTPCR	-0.941077	-0.941077	0.149007	0.244819	-0.867287	-1.26654	406826	2
1908	CKB	-1.1026	-1.1026	0.149055	0.244819	-0.867258	-1.2665	406956	2
1902	CCDC171	-0.891987	-0.891987	0.149103	0.244819	-0.86723	-1.26646	407089	2
1912	ZNHIT2	-1.67249	-1.67249	0.149152	0.244819	-0.867201	-1.26642	407223	2
1915	CLEC2L	-0.902604	-0.902604	0.149505	0.245066	-0.867017	-1.26615	408185	2
1914	C14orf105	-0.877284	-0.877284	0.149532	0.245066	-0.867003	-1.26613	408260	2
1913	PRDX4	-0.821615	-0.821615	0.149587	0.245066	-0.866974	-1.26608	408411	2
1916	SMARCC2	-1.03814	-1.03814	0.149615	0.245066	-0.86696	-1.26606	408486	2
1918	SFMBT1	-0.91348	-0.91348	0.14992	0.245186	-0.86679	-1.26581	409320	2
1920	DGCR14	-1.1573	-1.1573	0.149972	0.245186	-0.866761	-1.26577	409461	2
1921	GGPS1	-1.39526	-1.39526	0.150028	0.245186	-0.866733	-1.26573	409615	2
1917	VPS13C	-0.907624	-0.907624	0.150057	0.245186	-0.866719	-1.26571	409693	2
1919	API5	-1.11365	-0.921005	0.150079	0.245186	-0.81469	-1.28733	444895	3
1922	CCL24	-0.647582	-0.657879	0.15021	0.245272	-0.814619	-1.28721	445284	3
1925	SUSD4	-0.976654	-0.976654	0.150313	0.245307	-0.866577	-1.2655	410392	2
1924	OSGEP	-0.975253	-0.975253	0.15039	0.245307	-0.866534	-1.26544	410601	2
1923	SCGB1C1	-0.825586	-0.825586	0.150465	0.245307	-0.866492	-1.26538	410808	2
1927	ADI1	-0.856902	-0.856902	0.150716	0.245393	-0.86635	-1.26517	411492	2
1930	RBM25	-1.82325	-1.15369	0.150756	0.245393	-0.814321	-1.28674	446903	3
1929	SIK3	-1.09888	-1.09888	0.150764	0.245393	-0.866321	-1.26513	411623	2
1928	ARF6	-0.854056	-0.953142	0.150836	0.245393	-0.814278	-1.28668	447139	3
1926	MAGEB3	-0.8064	-0.8064	0.150909	0.245393	-0.86625	-1.26503	412019	2
1933	IDI1	-2.63463	-2.63463	0.151169	0.245555	-0.866108	-1.26482	412728	2
1932	MCM4	-1.22351	-1.22351	0.151219	0.245555	-0.86608	-1.26478	412865	2
1931	STRA13	-0.865286	-0.865286	0.151243	0.245555	-0.866066	-1.26476	412931	2
1935	VAPA	-1.41894	-1.41894	0.151347	0.245574	-0.866009	-1.26467	413216	2
1934	IKBKB	-0.853057	-0.665731	0.151411	0.245574	-0.813952	-1.28616	448846	3
1936	LBR	-0.981173	-0.981173	0.151665	0.245859	-0.865839	-1.26443	414084	2
1937	TXK	-0.806741	-0.612269	0.151753	0.245875	-0.813767	-1.28587	449859	3
1938	SAP130	-0.926582	-1.0499	0.151874	0.245943	-0.813696	-1.28576	450217	3
1939	SRPX	-0.914604	-0.914604	0.151982	0.245991	-0.865668	-1.26418	414948	2
1940	ZNF586	-0.878223	-0.878223	0.152164	0.246159	-0.865569	-1.26403	415446	2
1941	OBFC1	-0.674238	-0.679094	0.15253	0.246511	-0.813313	-1.28515	452163	3
1942	TAX1BP1	-1.04079	-1.04079	0.152538	0.246511	-0.86537	-1.26374	416468	2
1945	VPS54	-1.09507	-1.15936	0.152874	0.246799	-0.772007	-1.29702	484091	4
1943	TSNAX	-0.949313	-0.949313	0.152908	0.246799	-0.865157	-1.26343	417477	2
1944	EIF3K	-0.969789	-0.969789	0.152952	0.246799	-0.865129	-1.26339	417598	2
1946	ENPP2	-0.984177	-0.984177	0.153101	0.246906	-0.865044	-1.26326	418003	2
1947	ARFGEF1	-1.08666	-1.08666	0.153176	0.246906	-0.865001	-1.2632	418209	2
1948	CTTNBP2	-0.898891	-0.898891	0.153469	0.247252	-0.864845	-1.26297	419009	2
1950	IFI35	-0.957004	-0.957004	0.154145	0.248178	-0.86449	-1.26246	420854	2
1949	TCF4	-0.874377	-0.874377	0.154202	0.248178	-0.864462	-1.26241	421011	2
1953	ACTN2	-1.37076	-1.37076	0.154384	0.248204	-0.864362	-1.26227	421508	2
1951	C3AR1	-0.871666	-0.871666	0.154426	0.248204	-0.864334	-1.26223	421622	2
1952	OR4N4	-1.17426	-1.17426	0.154456	0.248204	-0.86432	-1.26221	421703	2
1954	PIH1D1	-0.803379	-0.803379	0.154621	0.248343	-0.864235	-1.26208	422155	2
1955	HARS2	-0.984892	-0.984892	0.154806	0.248422	-0.864135	-1.26194	422658	2
1956	SLC39A3	-0.997758	-0.997758	0.154831	0.248422	-0.864121	-1.26192	422728	2
1957	PCDH17	-1.36771	-1.36771	0.154908	0.248422	-0.864078	-1.26185	422936	2
1958	TCP11L1	-0.876135	-0.876135	0.155121	0.248638	-0.863965	-1.26169	423520	2
1959	SYT6	-1.06183	-1.06183	0.155218	0.248666	-0.863908	-1.26161	423785	2
1962	PLEKHA3	-0.899294	-0.899294	0.155579	0.249048	-0.863709	-1.26132	424770	2
1961	ZNF281	-0.839767	-0.839767	0.155662	0.249048	-0.863667	-1.26125	424995	2
1960	PAN2	-0.730565	-0.684435	0.155695	0.249048	-0.81151	-1.2823	461543	3
1963	ATG9A	-1.08286	-0.965604	0.155781	0.249059	-0.811467	-1.28223	461799	3
1964	EIF4G1	-0.890338	-0.890338	0.155987	0.249261	-0.863482	-1.26098	425882	2
1965	TRAPPC13	-1.24783	-1.24783	0.156148	0.249392	-0.863397	-1.26086	426323	2
1966	GABPB1	-0.965674	-0.965674	0.156236	0.249406	-0.863354	-1.2608	426563	2
1967	RPS3A	-1.01888	-1.01888	0.156735	0.250075	-0.863085	-1.2604	427926	2
1969	MUC17	-0.973815	-0.973815	0.156895	0.250158	-0.863	-1.26028	428362	2
1968	AGTR2	-0.823083	-0.823083	0.156946	0.250158	-0.862971	-1.26024	428502	2
1970	BTNL9	-0.800025	-0.800025	0.15703	0.250165	-0.862929	-1.26018	428731	2
1971	PLA2G4A	-1.12721	-1.23673	0.157141	0.250214	-0.810701	-1.28102	465831	3
1975	RNF8	-1.2722	-1.2722	0.157377	0.250288	-0.86273	-1.25989	429679	2
1974	CAPRIN2	-1.17472	-1.17472	0.157455	0.250288	-0.862687	-1.25982	429890	2
1972	FAM35A	-0.807375	-0.807375	0.157483	0.250288	-0.862673	-1.2598	429968	2
1973	FBXO42	-0.838029	-0.838029	0.157506	0.250288	-0.862659	-1.25978	430030	2
1980	CEP290	-1.06395	-1.06395	0.157949	0.250601	-0.862417	-1.25943	431239	2
1981	RRP15	-1.17945	-1.17945	0.158027	0.250601	-0.862375	-1.25937	431454	2
1977	MTERF	-0.801688	-0.801688	0.158057	0.250601	-0.862361	-1.25935	431535	2
1978	VEZT	-0.808981	-0.808981	0.158079	0.250601	-0.862347	-1.25933	431595	2
1979	UBE3A	-0.950116	-0.950116	0.158103	0.250601	-0.862332	-1.2593	431660	2
1976	C8G	-0.789733	-0.789733	0.158182	0.250601	-0.86229	-1.25924	431876	2
1982	GTSE1	-0.971063	-0.971063	0.15831	0.250626	-0.862219	-1.25914	432226	2
1983	SPCS3	-1.3297	-1.3297	0.158357	0.250626	-0.86219	-1.2591	432355	2
1985	HYDIN	-0.951329	-0.951329	0.158766	0.2511	-0.861963	-1.25877	433471	2
1984	TOMM20	-0.809154	-0.809154	0.158817	0.2511	-0.861935	-1.25872	433609	2
1986	TRIP13	-1.87015	-1.87015	0.158995	0.251256	-0.861835	-1.25858	434097	2
1987	TMBIM1	-0.984869	-0.984869	0.159248	0.251529	-0.861694	-1.25837	434788	2
1988	CCNB1	-1.04272	-1.19602	0.159425	0.251681	-0.809437	-1.27903	472601	3
1989	ALPL	-0.869382	-0.869382	0.159629	0.251783	-0.861495	-1.25808	435826	2
1990	MAP1A	-0.930278	-0.930278	0.15965	0.251783	-0.861481	-1.25806	435884	2
1991	GRAP2	-0.801221	-0.801221	0.159761	0.251831	-0.861424	-1.25798	436186	2
1992	APOBEC4	-0.955724	-0.955724	0.159992	0.252069	-0.861296	-1.25779	436817	2
1993	OR11H4	-1.05509	-1.05509	0.160224	0.252309	-0.861168	-1.2576	437452	2
1994	MOSPD2	-0.969277	-0.969277	0.160407	0.25247	-0.861069	-1.25746	437950	2
1995	DOLK	-0.876594	-0.876594	0.160579	0.252614	-0.86097	-1.25731	438421	2
1996	TOMM40	-1.1495	-1.1495	0.160674	0.252637	-0.860913	-1.25723	438680	2
1997	MYO9B	-0.910225	-0.910225	0.160799	0.252706	-0.860842	-1.25713	439020	2
1998	RSF1	-0.776838	-0.776838	0.160984	0.252872	-0.860742	-1.25698	439527	2
[truncated: 1,141 more rows]
