# Supplementary material for: A genome-wide CRISPR functional survey of the human phagocytosis molecular machinery
Source: Life Sci Alliance. 2023 Feb 1;6(4):e202201715. doi: 10.26508/lsa.202201715 (PMC9892931; doi:10.26508/lsa.202201715)
Supplement: Supplementary file 4 [file LSA-2022-01715_TableS4.xlsx]

## Sheet: Description
Legend PPI table
Protein complexe assignment of Depleted PhagoLate vs PhagoNeg CRISPRko hits	Genes depleted in the PhagoLate population versus the PhagoNeg population (716 genes used for the study) and its assignment to protein complexes reported in CORUM-core database integrated with binary interactions reported for the genetic hits within the BioPlex 3.0.
Description of table headers
GeneName	Gene name
aLFC	average log2-fold change (aLFC) calculated for all sgRNAs
medLFC	median log2-fold change (aLFC) calculated for all sgRNAs
pval	enrichment p-value
padj	Benjamini-Hochberg adjusted p-value
ES	enrichment score
NES	normalized enrichment score (normalized to mean enrichment of random samples of the same size)
nMoreExtreme	the number of occurrences of a random gene set having a more extreme enrichment score
size	size of pathway after removing sgRNAs not present in enrichment
leadingEdge	ID of scoring sgRNAs of the respective gene
totalSize	total amount of sgRNAs for the respective gene
entrez	Entrez ID for node A in the binary PPI-network of the genetic hits
UniprotA	UniProtKB accession for node A in binary the PPI-network of the genetic hits
Rank_aLFC	sorted rank of genetic hits sorted by decreasing average log2-fold change (aLFC) calculated for all sgRNAs (considering node A)
GeneA	DisGeNET ID for node A in the binary PPI-network of the genetic hits
GeneB	DisGeNET ID for node B in the binary PPI-network of the genetic hits
UniprotB	UniProtKB accession for node B in the binary PPI-network of the genetic hits
SymbolA	gene symbol/gene name for node A in the binary PPI-network of the genetic hits
SymbolB	gene symbol/gene name for node B in the binary PPI-network of the genetic hits
pW	reported bioplex 3.0 likelihood that the PPI-interaction (node A - node B) results from an incorrect protein identification ( pW )
pNI	reported bioplex 3.0 likelihood that the PPI-interaction (node A - node B) was classified as background/ non-interacting (pNI)
pInt	reported bioplex 3.0 likelihood that the PPI-interaction (node A - node B) was classified as a bona fide interacting partner (pInt)
connectivity	interactions of node A (significant genetic hit) with other significant genetic hits in the integrated binary PPI-network
Number_of_complexes_containing_the_protein	count of CORUM-core complexes in which node A (genetic hit) is an annotated complex subunit
ComplexNames	CORUM-core complexe name(s) in which node A (genetic hit) is an annotated complex subunit; multiple complexes are separated by a semicolon
Subunits_in_complex	count of subunits reported for CORUM-core complexes in which node A (genetic hit) is an annotaed subunit; multiple complexes are separated by a semicolon
Subunits_recovered_in_PPI_network	count of in the binary PPI-network of the gentic hits, recovered subunits for CORUM-core complexes in which node A (genetic hit) is an annotaed subunit; multiple complexes are separated by a semicolon
ComplexIDs	CORUM-core complex ID; multiple complexes are separted by a semicolon

## Sheet: Protein complexe assignment
	GeneName	aLFC	medLFC	pval	padj	ES	NES	nMoreExtreme	size	leadingEdge	totalSize	entrez	UniprotA	Rank_aLFC	GeneA	GeneB	UniprotB	SymbolA	SymbolB	pW	pNI	pInt	connectivity	Number_of_complexes_containing_the_protein	ComplexNames	Subunits_in_complex	Subunits_recoved_in_PPI_network	ComplexIDs
0	ACTR2	-2.28963	-2.45929	3.87003e-07	1.479e-05	-0.996025	-1.78779	0	4	ACTR2_1; ACTR2_3; ACTR2_2; ACTR2_4	4	10097	P61160	2	10097	10095	O15143	ACTR2	ARPC1B	2.11809e-16	0.0101923	0.989808	4	1	Arp2/3 protein complex	7	7	27
1	ACTR2	-2.28963	-2.45929	3.87003e-07	1.479e-05	-0.996025	-1.78779	0	4	ACTR2_1; ACTR2_3; ACTR2_2; ACTR2_4	4	10097	P61160	2	10097	10094	O15145	ACTR2	ARPC3	3.36883e-12	0.0247445	0.975255	4	1	Arp2/3 protein complex	7	7	27
2	ACTR2	-2.28963	-2.45929	3.87003e-07	1.479e-05	-0.996025	-1.78779	0	4	ACTR2_1; ACTR2_3; ACTR2_2; ACTR2_4	4	10097	P61160	2	10097	10096	P61158	ACTR2	ACTR3	9.53353e-14	0.00513449	0.994866	4	1	Arp2/3 protein complex	7	7	27
3	ACTR2	-2.28963	-2.45929	3.87003e-07	1.479e-05	-0.996025	-1.78779	0	4	ACTR2_1; ACTR2_3; ACTR2_2; ACTR2_4	4	10097	P61160	2	10097	10093	P59998	ACTR2	ARPC4	1.34003e-12	5.18709e-05	0.999948	4	1	Arp2/3 protein complex	7	7	27
4	VPS16	-1.97743	-2.18977	3.87003e-07	1.479e-05	-0.99418	-1.78447	0	4	VPS16_2; VPS16_4; VPS16_1; VPS16_3	4	64601	Q9H269	3	64601	65082	Q96AX1	VPS16	VPS33A	6.61346e-13	6.46925e-06	0.999994	4	7	Class C Vps complex (VPS11, VPS18, VPS16); Class C VPS/HOPS complex; Hook1-Vps16 complex; Hook2-Vps16 complex; FTS-Vps16 complex; CORVET complex; HOPS complex	3; 6; 2; 2; 2; 6; 6	2; 2; 1; 1; 1; 5; 4	944; 2573; 6116; 6120; 6124; 6388; 6389
5	VPS16	-1.97743	-2.18977	3.87003e-07	1.479e-05	-0.99418	-1.78447	0	4	VPS16_2; VPS16_4; VPS16_1; VPS16_3	4	64601	Q9H269	3	64601	9392	Q8WUH2	VPS16	TGFBRAP1	1.81369e-16	2.96902e-05	0.99997	4	7	Class C Vps complex (VPS11, VPS18, VPS16); Class C VPS/HOPS complex; Hook1-Vps16 complex; Hook2-Vps16 complex; FTS-Vps16 complex; CORVET complex; HOPS complex	3; 6; 2; 2; 2; 6; 6	2; 2; 1; 1; 1; 5; 4	944; 2573; 6116; 6120; 6124; 6388; 6389
6	VPS16	-1.97743	-2.18977	3.87003e-07	1.479e-05	-0.99418	-1.78447	0	4	VPS16_2; VPS16_4; VPS16_1; VPS16_3	4	64601	Q9H269	3	64601	27072	P49754	VPS16	VPS41	9.33037e-15	1.14514e-05	0.999989	4	7	Class C Vps complex (VPS11, VPS18, VPS16); Class C VPS/HOPS complex; Hook1-Vps16 complex; Hook2-Vps16 complex; FTS-Vps16 complex; CORVET complex; HOPS complex	3; 6; 2; 2; 2; 6; 6	2; 2; 1; 1; 1; 5; 4	944; 2573; 6116; 6120; 6124; 6388; 6389
7	VPS16	-1.97743	-2.18977	3.87003e-07	1.479e-05	-0.99418	-1.78447	0	4	VPS16_2; VPS16_4; VPS16_1; VPS16_3	4	64601	Q9H269	3	64601	84191	Q9H5X1	VPS16	FAM96A	4.91271e-09	0.00978901	0.990211	4	7	Class C Vps complex (VPS11, VPS18, VPS16); Class C VPS/HOPS complex; Hook1-Vps16 complex; Hook2-Vps16 complex; FTS-Vps16 complex; CORVET complex; HOPS complex	3; 6; 2; 2; 2; 6; 6	2; 2; 1; 1; 1; 5; 4	944; 2573; 6116; 6120; 6124; 6388; 6389
8	EIF5A	-1.85362	-1.85362	9.01158e-05	0.000827731	-0.997899	-1.50799	226	2	EIF5A_2; EIF5A_1	2	1984	P63241	4	1984	83475	Q9BU89	EIF5A	DOHH	6.89229e-14	0.0209862	0.979014	1
9	ACTR3	-1.7095	-1.7023	3.87003e-07	1.479e-05	-0.998098	-1.79151	0	4	ACTR3_1; ACTR3_4; ACTR3_2; ACTR3_3	4	10096	P61158	5	10096	10109	O15144	ACTR3	ARPC2	9.17134e-14	0.00838678	0.991613	6	2	Arp2/3 protein complex; ARP3-WHAMM complex	7; 2	7; 1	27; 6725
10	ACTR3	-1.7095	-1.7023	3.87003e-07	1.479e-05	-0.998098	-1.79151	0	4	ACTR3_1; ACTR3_4; ACTR3_2; ACTR3_3	4	10096	P61158	5	10096	10097	P61160	ACTR3	ACTR2	9.53353e-14	0.00513449	0.994866	6	2	Arp2/3 protein complex; ARP3-WHAMM complex	7; 2	7; 1	27; 6725
11	ACTR3	-1.7095	-1.7023	3.87003e-07	1.479e-05	-0.998098	-1.79151	0	4	ACTR3_1; ACTR3_4; ACTR3_2; ACTR3_3	4	10096	P61158	5	10096	10093	P59998	ACTR3	ARPC4	4.74967e-15	0.114622	0.885378	6	2	Arp2/3 protein complex; ARP3-WHAMM complex	7; 2	7; 1	27; 6725
12	ACTR3	-1.7095	-1.7023	3.87003e-07	1.479e-05	-0.998098	-1.79151	0	4	ACTR3_1; ACTR3_4; ACTR3_2; ACTR3_3	4	10096	P61158	5	10096	10095	O15143	ACTR3	ARPC1B	1.39986e-13	0.0264926	0.973507	6	2	Arp2/3 protein complex; ARP3-WHAMM complex	7; 2	7; 1	27; 6725
13	ACTR3	-1.7095	-1.7023	3.87003e-07	1.479e-05	-0.998098	-1.79151	0	4	ACTR3_1; ACTR3_4; ACTR3_2; ACTR3_3	4	10096	P61158	5	10096	10092	O15511	ACTR3	ARPC5	1.00556e-29	0.00239526	0.997605	6	2	Arp2/3 protein complex; ARP3-WHAMM complex	7; 2	7; 1	27; 6725
14	ACTR3	-1.7095	-1.7023	3.87003e-07	1.479e-05	-0.998098	-1.79151	0	4	ACTR3_1; ACTR3_4; ACTR3_2; ACTR3_3	4	10096	P61158	5	10096	10094	O15145	ACTR3	ARPC3	4.01979e-25	1.12164e-05	0.999989	6	2	Arp2/3 protein complex; ARP3-WHAMM complex	7; 2	7; 1	27; 6725
15	ARPC4	-1.70451	-1.69391	3.87003e-07	1.479e-05	-0.998339	-1.79194	0	4	ARPC4_2; ARPC4_4; ARPC4_3; ARPC4_1	4	10093	P59998	6	10093	10109	O15144	ARPC4	ARPC2	8.39046e-13	9.47638e-05	0.999905	6	1	Arp2/3 protein complex	7	7	27
16	ARPC4	-1.70451	-1.69391	3.87003e-07	1.479e-05	-0.998339	-1.79194	0	4	ARPC4_2; ARPC4_4; ARPC4_3; ARPC4_1	4	10093	P59998	6	10093	10097	P61160	ARPC4	ACTR2	1.34003e-12	5.18709e-05	0.999948	6	1	Arp2/3 protein complex	7	7	27
17	ARPC4	-1.70451	-1.69391	3.87003e-07	1.479e-05	-0.998339	-1.79194	0	4	ARPC4_2; ARPC4_4; ARPC4_3; ARPC4_1	4	10093	P59998	6	10093	10095	O15143	ARPC4	ARPC1B	1.11642e-13	0.000216316	0.999784	6	1	Arp2/3 protein complex	7	7	27
18	ARPC4	-1.70451	-1.69391	3.87003e-07	1.479e-05	-0.998339	-1.79194	0	4	ARPC4_2; ARPC4_4; ARPC4_3; ARPC4_1	4	10093	P59998	6	10093	10096	P61158	ARPC4	ACTR3	4.74967e-15	0.114622	0.885378	6	1	Arp2/3 protein complex	7	7	27
19	ARPC4	-1.70451	-1.69391	3.87003e-07	1.479e-05	-0.998339	-1.79194	0	4	ARPC4_2; ARPC4_4; ARPC4_3; ARPC4_1	4	10093	P59998	6	10093	10092	O15511	ARPC4	ARPC5	3.49717e-24	0.000395246	0.999605	6	1	Arp2/3 protein complex	7	7	27
20	ARPC4	-1.70451	-1.69391	3.87003e-07	1.479e-05	-0.998339	-1.79194	0	4	ARPC4_2; ARPC4_4; ARPC4_3; ARPC4_1	4	10093	P59998	6	10093	10094	O15145	ARPC4	ARPC3	2.39165e-25	1.01094e-05	0.99999	6	1	Arp2/3 protein complex	7	7	27
21	PAXIP1	-1.6971	-1.63966	3.87003e-07	1.479e-05	-0.99868	-1.79255	0	4	PAXIP1_1; PAXIP1_3; PAXIP1_4; PAXIP1_2	4	22976	Q6ZW49	7	22976	5929	Q15291	PAXIP1	RBBP5	1.91075e-09	3.20013e-07	1	3	5	UTX-MLL2/3 complex; PTIP-HMT complex; PTIP-DNA damage response complex; MLL3 complex; MLL4 complex	12; 10; 6; 9; 9	4; 6; 2; 6; 5	3075; 5195; 5197; 6461; 6467
22	PAXIP1	-1.6971	-1.63966	3.87003e-07	1.479e-05	-0.99868	-1.79255	0	4	PAXIP1_1; PAXIP1_3; PAXIP1_4; PAXIP1_2	4	22976	Q6ZW49	7	22976	9070	Q9UBL3	PAXIP1	ASH2L	9.02451e-12	3.69634e-06	0.999996	3	5	UTX-MLL2/3 complex; PTIP-HMT complex; PTIP-DNA damage response complex; MLL3 complex; MLL4 complex	12; 10; 6; 9; 9	4; 6; 2; 6; 5	3075; 5195; 5197; 6461; 6467
23	PAXIP1	-1.6971	-1.63966	3.87003e-07	1.479e-05	-0.99868	-1.79255	0	4	PAXIP1_1; PAXIP1_3; PAXIP1_4; PAXIP1_2	4	22976	Q6ZW49	7	22976	79447	Q9BTK6	PAXIP1	PAGR1	6.09863e-11	1.16992e-08	1	3	5	UTX-MLL2/3 complex; PTIP-HMT complex; PTIP-DNA damage response complex; MLL3 complex; MLL4 complex	12; 10; 6; 9; 9	4; 6; 2; 6; 5	3075; 5195; 5197; 6461; 6467
24	VPS29	-1.68446	-1.66648	3.92472e-07	1.479e-05	-0.998964	-1.66543	0	3	VPS29_4; VPS29_1; VPS29_2	4	51699	Q9UBQ0	8	51699	57020	Q7Z3J2	VPS29	C16orf62	6.49947e-08	2.66203e-07	1	10	2	Retromer complex (SNX1, SNX2, VPS35, VPS29, VPS26A); Retromer complex (SNX1, SNX2, VPS35, VPS29, VPS26B)	5; 5	2; 2	657; 1060
25	VPS29	-1.68446	-1.66648	3.92472e-07	1.479e-05	-0.998964	-1.66543	0	3	VPS29_4; VPS29_1; VPS29_2	4	51699	Q9UBQ0	8	51699	54520	Q567U6	VPS29	CCDC93	7.76784e-13	4.31125e-06	0.999996	10	2	Retromer complex (SNX1, SNX2, VPS35, VPS29, VPS26A); Retromer complex (SNX1, SNX2, VPS35, VPS29, VPS26B)	5; 5	2; 2	657; 1060
26	VPS29	-1.68446	-1.66648	3.92472e-07	1.479e-05	-0.998964	-1.66543	0	3	VPS29_4; VPS29_1; VPS29_2	4	51699	Q9UBQ0	8	51699	55737	Q96QK1	VPS29	VPS35	4.1064e-28	3.20977e-10	1	10	2	Retromer complex (SNX1, SNX2, VPS35, VPS29, VPS26A); Retromer complex (SNX1, SNX2, VPS35, VPS29, VPS26B)	5; 5	2; 2	657; 1060
27	VPS29	-1.68446	-1.66648	3.92472e-07	1.479e-05	-0.998964	-1.66543	0	3	VPS29_4; VPS29_1; VPS29_2	4	51699	Q9UBQ0	8	51699	54939	Q9H0A8	VPS29	COMMD4	5.36831e-19	0.0946933	0.905307	10	2	Retromer complex (SNX1, SNX2, VPS35, VPS29, VPS26A); Retromer complex (SNX1, SNX2, VPS35, VPS29, VPS26B)	5; 5	2; 2	657; 1060
28	VPS29	-1.68446	-1.66648	3.92472e-07	1.479e-05	-0.998964	-1.66543	0	3	VPS29_4; VPS29_1; VPS29_2	4	51699	Q9UBQ0	8	51699	54951	Q9NX08	VPS29	COMMD8	3.9092e-19	0.000118008	0.999882	10	2	Retromer complex (SNX1, SNX2, VPS35, VPS29, VPS26A); Retromer complex (SNX1, SNX2, VPS35, VPS29, VPS26B)	5; 5	2; 2	657; 1060
29	VPS29	-1.68446	-1.66648	3.92472e-07	1.479e-05	-0.998964	-1.66543	0	3	VPS29_4; VPS29_1; VPS29_2	4	51699	Q9UBQ0	8	51699	28952	O60826	VPS29	CCDC22	2.01585e-29	3.50524e-05	0.999965	10	2	Retromer complex (SNX1, SNX2, VPS35, VPS29, VPS26A); Retromer complex (SNX1, SNX2, VPS35, VPS29, VPS26B)	5; 5	2; 2	657; 1060
30	VPS29	-1.68446	-1.66648	3.92472e-07	1.479e-05	-0.998964	-1.66543	0	3	VPS29_4; VPS29_1; VPS29_2	4	51699	Q9UBQ0	8	51699	23412	Q9UBI1	VPS29	COMMD3	8.1253e-25	4.61944e-05	0.999954	10	2	Retromer complex (SNX1, SNX2, VPS35, VPS29, VPS26A); Retromer complex (SNX1, SNX2, VPS35, VPS29, VPS26B)	5; 5	2; 2	657; 1060
31	VPS29	-1.68446	-1.66648	3.92472e-07	1.479e-05	-0.998964	-1.66543	0	3	VPS29_4; VPS29_1; VPS29_2	4	51699	Q9UBQ0	8	51699	28991	Q9GZQ3	VPS29	COMMD5	2.61659e-25	5.22311e-07	0.999999	10	2	Retromer complex (SNX1, SNX2, VPS35, VPS29, VPS26A); Retromer complex (SNX1, SNX2, VPS35, VPS29, VPS26B)	5; 5	2; 2	657; 1060
32	VPS29	-1.68446	-1.66648	3.92472e-07	1.479e-05	-0.998964	-1.66543	0	3	VPS29_4; VPS29_1; VPS29_2	4	51699	Q9UBQ0	8	51699	51397	Q9Y6G5	VPS29	COMMD10	7.75518e-26	6.69774e-08	1	10	2	Retromer complex (SNX1, SNX2, VPS35, VPS29, VPS26A); Retromer complex (SNX1, SNX2, VPS35, VPS29, VPS26B)	5; 5	2; 2	657; 1060
33	VPS29	-1.68446	-1.66648	3.92472e-07	1.479e-05	-0.998964	-1.66543	0	3	VPS29_4; VPS29_1; VPS29_2	4	51699	Q9UBQ0	8	51699	51122	Q86X83	VPS29	COMMD2	1.41314e-20	0.00122617	0.998774	10	2	Retromer complex (SNX1, SNX2, VPS35, VPS29, VPS26A); Retromer complex (SNX1, SNX2, VPS35, VPS29, VPS26B)	5; 5	2; 2	657; 1060
34	LAMTOR5	-1.62459	-1.5589	3.87003e-07	1.479e-05	-0.997047	-1.78962	0	4	LAMTOR5_4; LAMTOR5_3; LAMTOR5_1; LAMTOR5_2	4	10542	O43504	10	10542	28956	Q9Y2Q5	LAMTOR5	LAMTOR2	1.82787e-20	1.23578e-05	0.999988	18	1	v-ATPase-Ragulator-AXIN/LKB1-AMPK complex	14	7	6888
35	LAMTOR5	-1.62459	-1.5589	3.87003e-07	1.479e-05	-0.997047	-1.78962	0	4	LAMTOR5_4; LAMTOR5_3; LAMTOR5_1; LAMTOR5_2	4	10542	O43504	10	10542	51605	Q9UJA5	LAMTOR5	TRMT6	4.27241e-08	0.00618879	0.993811	18	1	v-ATPase-Ragulator-AXIN/LKB1-AMPK complex	14	7	6888
36	LAMTOR5	-1.62459	-1.5589	3.87003e-07	1.479e-05	-0.997047	-1.78962	0	4	LAMTOR5_4; LAMTOR5_3; LAMTOR5_1; LAMTOR5_2	4	10542	O43504	10	10542	3704	Q9BY32	LAMTOR5	ITPA	5.24323e-10	1.18657e-07	1	18	1	v-ATPase-Ragulator-AXIN/LKB1-AMPK complex	14	7	6888
37	LAMTOR5	-1.62459	-1.5589	3.87003e-07	1.479e-05	-0.997047	-1.78962	0	4	LAMTOR5_4; LAMTOR5_3; LAMTOR5_1; LAMTOR5_2	4	10542	O43504	10	10542	729991	Q96FH0	LAMTOR5	MEF2BNB	3.48631e-07	0.00179582	0.998204	18	1	v-ATPase-Ragulator-AXIN/LKB1-AMPK complex	14	7	6888
38	LAMTOR5	-1.62459	-1.5589	3.87003e-07	1.479e-05	-0.997047	-1.78962	0	4	LAMTOR5_4; LAMTOR5_3; LAMTOR5_1; LAMTOR5_2	4	10542	O43504	10	10542	118426	Q969J3	LAMTOR5	LOH12CR1	1.19359e-12	4.35621e-05	0.999956	18	1	v-ATPase-Ragulator-AXIN/LKB1-AMPK complex	14	7	6888
39	LAMTOR5	-1.62459	-1.5589	3.87003e-07	1.479e-05	-0.997047	-1.78962	0	4	LAMTOR5_4; LAMTOR5_3; LAMTOR5_1; LAMTOR5_2	4	10542	O43504	10	10542	54785	Q96GS4	LAMTOR5	C17orf59	6.58137e-24	4.3439e-05	0.999957	18	1	v-ATPase-Ragulator-AXIN/LKB1-AMPK complex	14	7	6888
40	LAMTOR5	-1.62459	-1.5589	3.87003e-07	1.479e-05	-0.997047	-1.78962	0	4	LAMTOR5_4; LAMTOR5_3; LAMTOR5_1; LAMTOR5_2	4	10542	O43504	10	10542	57521	Q8N122	LAMTOR5	RPTOR	3.31434e-11	0.00248066	0.997519	18	1	v-ATPase-Ragulator-AXIN/LKB1-AMPK complex	14	7	6888
41	LAMTOR5	-1.62459	-1.5589	3.87003e-07	1.479e-05	-0.997047	-1.78962	0	4	LAMTOR5_4; LAMTOR5_3; LAMTOR5_1; LAMTOR5_2	4	10542	O43504	10	10542	10670	Q7L523	LAMTOR5	RRAGA	8.01889e-16	2.65896e-07	1	18	1	v-ATPase-Ragulator-AXIN/LKB1-AMPK complex	14	7	6888
42	LAMTOR5	-1.62459	-1.5589	3.87003e-07	1.479e-05	-0.997047	-1.78962	0	4	LAMTOR5_4; LAMTOR5_3; LAMTOR5_1; LAMTOR5_2	4	10542	O43504	10	10542	282991	Q6QNY1	LAMTOR5	BLOC1S2	1.34975e-06	0.00268671	0.997312	18	1	v-ATPase-Ragulator-AXIN/LKB1-AMPK complex	14	7	6888
43	LAMTOR5	-1.62459	-1.5589	3.87003e-07	1.479e-05	-0.997047	-1.78962	0	4	LAMTOR5_4; LAMTOR5_3; LAMTOR5_1; LAMTOR5_2	4	10542	O43504	10	10542	119032	Q96B45	LAMTOR5	C10orf32	1.16979e-09	0.000146306	0.999854	18	1	v-ATPase-Ragulator-AXIN/LKB1-AMPK complex	14	7	6888
44	LAMTOR5	-1.62459	-1.5589	3.87003e-07	1.479e-05	-0.997047	-1.78962	0	4	LAMTOR5_4; LAMTOR5_3; LAMTOR5_1; LAMTOR5_2	4	10542	O43504	10	10542	79036	Q9BQD3	LAMTOR5	KXD1	3.67921e-06	0.00820223	0.991794	18	1	v-ATPase-Ragulator-AXIN/LKB1-AMPK complex	14	7	6888
45	LAMTOR5	-1.62459	-1.5589	3.87003e-07	1.479e-05	-0.997047	-1.78962	0	4	LAMTOR5_4; LAMTOR5_3; LAMTOR5_1; LAMTOR5_2	4	10542	O43504	10	10542	23557	O95295	LAMTOR5	SNAPIN	1.26142e-06	0.0428456	0.957153	18	1	v-ATPase-Ragulator-AXIN/LKB1-AMPK complex	14	7	6888
46	LAMTOR5	-1.62459	-1.5589	3.87003e-07	1.479e-05	-0.997047	-1.78962	0	4	LAMTOR5_4; LAMTOR5_3; LAMTOR5_1; LAMTOR5_2	4	10542	O43504	10	10542	2671	P55789	LAMTOR5	GFER	0.000130855	0.0653301	0.934539	18	1	v-ATPase-Ragulator-AXIN/LKB1-AMPK complex	14	7	6888
47	LAMTOR5	-1.62459	-1.5589	3.87003e-07	1.479e-05	-0.997047	-1.78962	0	4	LAMTOR5_4; LAMTOR5_3; LAMTOR5_1; LAMTOR5_2	4	10542	O43504	10	10542	116461	Q8WW01	LAMTOR5	TSEN15	0.000487916	0.162136	0.837376	18	1	v-ATPase-Ragulator-AXIN/LKB1-AMPK complex	14	7	6888
48	LAMTOR5	-1.62459	-1.5589	3.87003e-07	1.479e-05	-0.997047	-1.78962	0	4	LAMTOR5_4; LAMTOR5_3; LAMTOR5_1; LAMTOR5_2	4	10542	O43504	10	10542	389541	Q0VGL1	LAMTOR5	LAMTOR4	1.68455e-21	6.90848e-13	1	18	1	v-ATPase-Ragulator-AXIN/LKB1-AMPK complex	14	7	6888
49	LAMTOR5	-1.62459	-1.5589	3.87003e-07	1.479e-05	-0.997047	-1.78962	0	4	LAMTOR5_4; LAMTOR5_3; LAMTOR5_1; LAMTOR5_2	4	10542	O43504	10	10542	8649	Q9UHA4	LAMTOR5	LAMTOR3	5.9143e-16	4.87724e-07	1	18	1	v-ATPase-Ragulator-AXIN/LKB1-AMPK complex	14	7	6888
50	LAMTOR5	-1.62459	-1.5589	3.87003e-07	1.479e-05	-0.997047	-1.78962	0	4	LAMTOR5_4; LAMTOR5_3; LAMTOR5_1; LAMTOR5_2	4	10542	O43504	10	10542	2647	P78537	LAMTOR5	BLOC1S1	8.28736e-18	0.0102406	0.989759	18	1	v-ATPase-Ragulator-AXIN/LKB1-AMPK complex	14	7	6888
51	LAMTOR5	-1.62459	-1.5589	3.87003e-07	1.479e-05	-0.997047	-1.78962	0	4	LAMTOR5_4; LAMTOR5_3; LAMTOR5_1; LAMTOR5_2	4	10542	O43504	10	10542	55004	Q6IAA8	LAMTOR5	LAMTOR1	1.3555e-21	0.00029032	0.99971	18	1	v-ATPase-Ragulator-AXIN/LKB1-AMPK complex	14	7	6888
52	VPS33A	-1.53774	-1.9089	0.000200946	0.00143877	-0.986031	-1.64387	511	3	VPS33A_4; VPS33A_1; VPS33A_2	4	65082	Q96AX1	11	65082	9392	Q8WUH2	VPS33A	TGFBRAP1	3.08684e-12	0.000889743	0.99911	4	2	CORVET complex; HOPS complex	6; 6	5; 4	6388; 6389
53	VPS33A	-1.53774	-1.9089	0.000200946	0.00143877	-0.986031	-1.64387	511	3	VPS33A_4; VPS33A_1; VPS33A_2	4	65082	Q96AX1	11	65082	27072	P49754	VPS33A	VPS41	3.82079e-14	2.57438e-05	0.999974	4	2	CORVET complex; HOPS complex	6; 6	5; 4	6388; 6389
54	VPS33A	-1.53774	-1.9089	0.000200946	0.00143877	-0.986031	-1.64387	511	3	VPS33A_4; VPS33A_1; VPS33A_2	4	65082	Q96AX1	11	65082	64601	Q9H269	VPS33A	VPS16	6.61346e-13	6.46925e-06	0.999994	4	2	CORVET complex; HOPS complex	6; 6	5; 4	6388; 6389
55	VPS33A	-1.53774	-1.9089	0.000200946	0.00143877	-0.986031	-1.64387	511	3	VPS33A_4; VPS33A_1; VPS33A_2	4	65082	Q96AX1	11	65082	84191	Q9H5X1	VPS33A	FAM96A	0.000258101	0.00268695	0.997055	4	2	CORVET complex; HOPS complex	6; 6	5; 4	6388; 6389
56	VPS41	-1.50478	-1.52919	1.93502e-06	5.54189e-05	-0.989992	-1.77696	4	4	VPS41_1; VPS41_3; VPS41_2; VPS41_4	4	27072	P49754	12	27072	65082	Q96AX1	VPS41	VPS33A	3.82079e-14	2.57438e-05	0.999974	5	5	Hook1-Vps41 complex; Hook2-Vps41 complex; Hook3-Vps41 complex; FTS-Vps41 complex; HOPS complex	2; 2; 2; 2; 6	1; 1; 1; 1; 4	6119; 6121; 6123; 6126; 6389
57	VPS41	-1.50478	-1.52919	1.93502e-06	5.54189e-05	-0.989992	-1.77696	4	4	VPS41_1; VPS41_3; VPS41_2; VPS41_4	4	27072	P49754	12	27072	64601	Q9H269	VPS41	VPS16	9.33037e-15	1.14514e-05	0.999989	5	5	Hook1-Vps41 complex; Hook2-Vps41 complex; Hook3-Vps41 complex; FTS-Vps41 complex; HOPS complex	2; 2; 2; 2; 6	1; 1; 1; 1; 4	6119; 6121; 6123; 6126; 6389
58	VPS41	-1.50478	-1.52919	1.93502e-06	5.54189e-05	-0.989992	-1.77696	4	4	VPS41_1; VPS41_3; VPS41_2; VPS41_4	4	27072	P49754	12	27072	57617	Q9P253	VPS41	VPS18	1.58092e-11	1.19471e-07	1	5	5	Hook1-Vps41 complex; Hook2-Vps41 complex; Hook3-Vps41 complex; FTS-Vps41 complex; HOPS complex	2; 2; 2; 2; 6	1; 1; 1; 1; 4	6119; 6121; 6123; 6126; 6389
59	VPS41	-1.50478	-1.52919	1.93502e-06	5.54189e-05	-0.989992	-1.77696	4	4	VPS41_1; VPS41_3; VPS41_2; VPS41_4	4	27072	P49754	12	27072	9392	Q8WUH2	VPS41	TGFBRAP1	3.26597e-18	1.82328e-12	1	5	5	Hook1-Vps41 complex; Hook2-Vps41 complex; Hook3-Vps41 complex; FTS-Vps41 complex; HOPS complex	2; 2; 2; 2; 6	1; 1; 1; 1; 4	6119; 6121; 6123; 6126; 6389
60	VPS41	-1.50478	-1.52919	1.93502e-06	5.54189e-05	-0.989992	-1.77696	4	4	VPS41_1; VPS41_3; VPS41_2; VPS41_4	4	27072	P49754	12	27072	84191	Q9H5X1	VPS41	FAM96A	0.000100578	0.0187187	0.981181	5	5	Hook1-Vps41 complex; Hook2-Vps41 complex; Hook3-Vps41 complex; FTS-Vps41 complex; HOPS complex	2; 2; 2; 2; 6	1; 1; 1; 1; 4	6119; 6121; 6123; 6126; 6389
61	MAFB	-1.49697	-1.63601	4.3172e-06	9.97133e-05	-0.99638	-1.66112	10	3	MAFB_2; MAFB_4; MAFB_3	4	9935	Q9Y5Q3	13	9935	571	O14867	MAFB	BACH1	8.86543e-09	1.4447e-06	0.999999	1
62	DOHH	-1.48637	-1.56867	1.93502e-06	5.54189e-05	-0.99012	-1.77719	4	4	DOHH_4; DOHH_2; DOHH_1; DOHH_3	4	83475	Q9BU89	14	83475	1984	P63241	DOHH	EIF5A	6.89229e-14	0.0209862	0.979014	2
63	DOHH	-1.48637	-1.56867	1.93502e-06	5.54189e-05	-0.99012	-1.77719	4	4	DOHH_4; DOHH_2; DOHH_1; DOHH_3	4	83475	Q9BU89	14	83475	56910	Q9NQZ5	DOHH	STARD7	0.000681926	0.0401451	0.959173	2
64	ARPC3	-1.4571	-1.45748	7.84945e-07	2.8101e-05	-0.997942	-1.66373	1	3	ARPC3_1; ARPC3_2; ARPC3_3	4	10094	O15145	16	10094	10109	O15144	ARPC3	ARPC2	1.9188e-12	0.00350757	0.996492	6	1	Arp2/3 protein complex	7	7	27
65	ARPC3	-1.4571	-1.45748	7.84945e-07	2.8101e-05	-0.997942	-1.66373	1	3	ARPC3_1; ARPC3_2; ARPC3_3	4	10094	O15145	16	10094	10097	P61160	ARPC3	ACTR2	3.36883e-12	0.0247445	0.975255	6	1	Arp2/3 protein complex	7	7	27
66	ARPC3	-1.4571	-1.45748	7.84945e-07	2.8101e-05	-0.997942	-1.66373	1	3	ARPC3_1; ARPC3_2; ARPC3_3	4	10094	O15145	16	10094	10096	P61158	ARPC3	ACTR3	7.82962e-29	0.000158982	0.999841	6	1	Arp2/3 protein complex	7	7	27
67	ARPC3	-1.4571	-1.45748	7.84945e-07	2.8101e-05	-0.997942	-1.66373	1	3	ARPC3_1; ARPC3_2; ARPC3_3	4	10094	O15145	16	10094	10095	O15143	ARPC3	ARPC1B	9.72714e-12	0.00732308	0.992677	6	1	Arp2/3 protein complex	7	7	27
68	ARPC3	-1.4571	-1.45748	7.84945e-07	2.8101e-05	-0.997942	-1.66373	1	3	ARPC3_1; ARPC3_2; ARPC3_3	4	10094	O15145	16	10094	10093	P59998	ARPC3	ARPC4	2.39165e-25	1.01094e-05	0.99999	6	1	Arp2/3 protein complex	7	7	27
69	ARPC3	-1.4571	-1.45748	7.84945e-07	2.8101e-05	-0.997942	-1.66373	1	3	ARPC3_1; ARPC3_2; ARPC3_3	4	10094	O15145	16	10094	10092	O15511	ARPC3	ARPC5	8.15885e-27	0.00750771	0.992492	6	1	Arp2/3 protein complex	7	7	27
70	TCEB2	-1.4383	-1.68762	4.59193e-05	0.000597785	-0.991837	-1.65355	116	3	TCEB2_1; TCEB2_3; TCEB2_2	4	6923	Q15370	18	6923	7428	P40337	TCEB2	VHL	3.74305e-13	0.00255711	0.997443	1	15	Ubiquitin E3 ligase (VHL, TCEB1, TCEB2, CUL2, RBX1); Ubiquitin E3 ligase (ASB2, TCEB1, TCEB2, CUL5, RNF7); Ubiquitin E3 ligase (ASB1, TCEB1, TCEB2, CUL5, RNF7); Ubiquitin E3 ligase (ASB6, TCEB1, TCEB2, CUL5, RNF7); Ubiquitin E3 ligase (ASB7, TCEB1, TCEB2, CUL5, RNF7); Ubiquitin E3 ligase (ASB12, TCEB1, TCEB2, CUL5, RNF7); Ubiquitin E3 ligase (WSB1, TCEB1, TCEB2, CUL5, RBX1); Ubiquitin E3 ligase (…	5; 5; 5; 5; 5; 5; 5; 4; 4; 3; 4; 4; 3; 7; 3	2; 1; 1; 1; 1; 1; 1; 2; 2; 2; 1; 2; 1; 1; 2	205; 207; 208; 209; 210; 211; 214; 622; 5267; 5270; 6268; 6485; 6738; 7556; 7576
71	POLR2B	-1.42991	-1.42991	0.000429539	0.00226139	-0.994946	-1.50353	1081	2	POLR2B_4; POLR2B_2	4	5431	P30876	19	5431	5435	P61218	POLR2B	POLR2F	1.51218e-13	0.114103	0.885897	5	9	RNA polymerase II holoenzyme complex; RNA polymerase II core complex; FCP1-associated protein complex; Integrator-RNAPII complex; Menin-associated histone methyltransferase complex; RNA polymerase II (RNAPII); BRCA1-core RNA polymerase II complex; RPAP1-RPB2-RPB3 complex; BRCA1-RNA polymerase II complex	24; 12; 7; 14; 7; 17; 13; 3; 26	4; 3; 1; 2; 4; 3; 3; 1; 4	103; 104; 811; 1155; 1254; 2685; 2686; 2812; 2825
72	POLR2B	-1.42991	-1.42991	0.000429539	0.00226139	-0.994946	-1.50353	1081	2	POLR2B_4; POLR2B_2	4	5431	P30876	19	5431	11060	O00308	POLR2B	WWP2	8.11201e-17	0.0370772	0.962923	5	9	RNA polymerase II holoenzyme complex; RNA polymerase II core complex; FCP1-associated protein complex; Integrator-RNAPII complex; Menin-associated histone methyltransferase complex; RNA polymerase II (RNAPII); BRCA1-core RNA polymerase II complex; RPAP1-RPB2-RPB3 complex; BRCA1-RNA polymerase II complex	24; 12; 7; 14; 7; 17; 13; 3; 26	4; 3; 1; 2; 4; 3; 3; 1; 4	103; 104; 811; 1155; 1254; 2685; 2686; 2812; 2825
73	POLR2B	-1.42991	-1.42991	0.000429539	0.00226139	-0.994946	-1.50353	1081	2	POLR2B_4; POLR2B_2	4	5431	P30876	19	5431	51184	Q9UHW5	POLR2B	GPN3	5.73126e-18	0.0753903	0.92461	5	9	RNA polymerase II holoenzyme complex; RNA polymerase II core complex; FCP1-associated protein complex; Integrator-RNAPII complex; Menin-associated histone methyltransferase complex; RNA polymerase II (RNAPII); BRCA1-core RNA polymerase II complex; RPAP1-RPB2-RPB3 complex; BRCA1-RNA polymerase II complex	24; 12; 7; 14; 7; 17; 13; 3; 26	4; 3; 1; 2; 4; 3; 3; 1; 4	103; 104; 811; 1155; 1254; 2685; 2686; 2812; 2825
74	POLR2B	-1.42991	-1.42991	0.000429539	0.00226139	-0.994946	-1.50353	1081	2	POLR2B_4; POLR2B_2	4	5431	P30876	19	5431	58490	Q9NQG5	POLR2B	RPRD1B	2.51902e-15	0.0213779	0.978622	5	9	RNA polymerase II holoenzyme complex; RNA polymerase II core complex; FCP1-associated protein complex; Integrator-RNAPII complex; Menin-associated histone methyltransferase complex; RNA polymerase II (RNAPII); BRCA1-core RNA polymerase II complex; RPAP1-RPB2-RPB3 complex; BRCA1-RNA polymerase II complex	24; 12; 7; 14; 7; 17; 13; 3; 26	4; 3; 1; 2; 4; 3; 3; 1; 4	103; 104; 811; 1155; 1254; 2685; 2686; 2812; 2825
75	POLR2B	-1.42991	-1.42991	0.000429539	0.00226139	-0.994946	-1.50353	1081	2	POLR2B_4; POLR2B_2	4	5431	P30876	19	5431	54707	Q9H9Y4	POLR2B	GPN2	2.51272e-18	0.105661	0.894339	5	9	RNA polymerase II holoenzyme complex; RNA polymerase II core complex; FCP1-associated protein complex; Integrator-RNAPII complex; Menin-associated histone methyltransferase complex; RNA polymerase II (RNAPII); BRCA1-core RNA polymerase II complex; RPAP1-RPB2-RPB3 complex; BRCA1-RNA polymerase II complex	24; 12; 7; 14; 7; 17; 13; 3; 26	4; 3; 1; 2; 4; 3; 3; 1; 4	103; 104; 811; 1155; 1254; 2685; 2686; 2812; 2825
76	LAMTOR2	-1.4207	-1.4207	0.000491468	0.00247811	-0.99462	-1.50303	1237	2	LAMTOR2_2; LAMTOR2_1	4	28956	Q9Y2Q5	20	28956	10670	Q7L523	LAMTOR2	RRAGA	2.00499e-08	2.80887e-07	1	6	3	p14-Mp1-MEK1 complex; p14-Mp1-ERK2 complex; v-ATPase-Ragulator-AXIN/LKB1-AMPK complex	3; 3; 14	2; 2; 7	5222; 5226; 6888
77	LAMTOR2	-1.4207	-1.4207	0.000491468	0.00247811	-0.99462	-1.50303	1237	2	LAMTOR2_2; LAMTOR2_1	4	28956	Q9Y2Q5	20	28956	389541	Q0VGL1	LAMTOR2	LAMTOR4	1.28729e-21	3.95479e-06	0.999996	6	3	p14-Mp1-MEK1 complex; p14-Mp1-ERK2 complex; v-ATPase-Ragulator-AXIN/LKB1-AMPK complex	3; 3; 14	2; 2; 7	5222; 5226; 6888
78	LAMTOR2	-1.4207	-1.4207	0.000491468	0.00247811	-0.99462	-1.50303	1237	2	LAMTOR2_2; LAMTOR2_1	4	28956	Q9Y2Q5	20	28956	8649	Q9UHA4	LAMTOR2	LAMTOR3	7.84671e-20	1.64263e-05	0.999984	6	3	p14-Mp1-MEK1 complex; p14-Mp1-ERK2 complex; v-ATPase-Ragulator-AXIN/LKB1-AMPK complex	3; 3; 14	2; 2; 7	5222; 5226; 6888
79	LAMTOR2	-1.4207	-1.4207	0.000491468	0.00247811	-0.99462	-1.50303	1237	2	LAMTOR2_2; LAMTOR2_1	4	28956	Q9Y2Q5	20	28956	55004	Q6IAA8	LAMTOR2	LAMTOR1	5.25394e-23	4.84299e-05	0.999952	6	3	p14-Mp1-MEK1 complex; p14-Mp1-ERK2 complex; v-ATPase-Ragulator-AXIN/LKB1-AMPK complex	3; 3; 14	2; 2; 7	5222; 5226; 6888
80	LAMTOR2	-1.4207	-1.4207	0.000491468	0.00247811	-0.99462	-1.50303	1237	2	LAMTOR2_2; LAMTOR2_1	4	28956	Q9Y2Q5	20	28956	10542	O43504	LAMTOR2	LAMTOR5	1.82787e-20	1.23578e-05	0.999988	6	3	p14-Mp1-MEK1 complex; p14-Mp1-ERK2 complex; v-ATPase-Ragulator-AXIN/LKB1-AMPK complex	3; 3; 14	2; 2; 7	5222; 5226; 6888
81	LAMTOR2	-1.4207	-1.4207	0.000491468	0.00247811	-0.99462	-1.50303	1237	2	LAMTOR2_2; LAMTOR2_1	4	28956	Q9Y2Q5	20	28956	54785	Q96GS4	LAMTOR2	C17orf59	1.76127e-13	0.000372801	0.999627	6	3	p14-Mp1-MEK1 complex; p14-Mp1-ERK2 complex; v-ATPase-Ragulator-AXIN/LKB1-AMPK complex	3; 3; 14	2; 2; 7	5222; 5226; 6888
82	SLC39A7	-1.4085	-1.21357	5.80505e-06	0.000115456	-0.98738	-1.77227	14	4	SLC39A7_2; SLC39A7_1; SLC39A7_3; SLC39A7_4	4	7922	Q92504	22	7922	571	O14867	SLC39A7	BACH1	1.92406e-10	2.69223e-05	0.999973	1
83	ATP6V1A	-1.37031	-1.37031	0.000354508	0.00199865	-0.9955	-1.50436	892	2	ATP6V1A_2; ATP6V1A_4	3	523	P38606	24	523	9550	O75348	ATP6V1A	ATP6V1G1	1.16994e-13	0.000308569	0.999691	2	1	v-ATPase-Ragulator-AXIN/LKB1-AMPK complex	14	7	6888
84	ATP6V1A	-1.37031	-1.37031	0.000354508	0.00199865	-0.9955	-1.50436	892	2	ATP6V1A_2; ATP6V1A_4	3	523	P38606	24	523	51382	Q9Y5K8	ATP6V1A	ATP6V1D	2.4177e-12	0.00239486	0.997605	2	1	v-ATPase-Ragulator-AXIN/LKB1-AMPK complex	14	7	6888
85	SUGT1	-1.33113	-1.33113	0.000167925	0.00127909	-0.997033	-1.50668	422	2	SUGT1_4; SUGT1_3	4	10910	Q9Y2Z0	26	10910	6251	Q15404	SUGT1	RSU1	8.56018e-26	0.24383	0.75617	1
86	GMPPB	-1.31387	-1.06745	6.63278e-05	0.000753351	-0.990801	-1.65182	168	3	GMPPB_2; GMPPB_1; GMPPB_3	3	29925	Q9Y5P6	28	29925	4331	P51948	GMPPB	MNAT1	0.00304187	0.0686323	0.928326	1
87	SMARCB1	-1.30054	-1.23026	0.000229204	0.00156936	-0.985236	-1.64254	583	3	SMARCB1_1; SMARCB1_3; SMARCB1_4	4	6598	Q12824	32	6598	8289	O14497	SMARCB1	ARID1A	2.41555e-14	0.0138295	0.98617	7	27	NUMAC complex (nucleosomal methylation activator complex); PBAF complex (Polybromo- and BAF containing complex); BAF complex; SWI-SNF chromatin remodeling-related-BRCA1 complex; PBAF complex (Polybromo- and BAF containing complex); p300-CBP-p270-SWI/SNF complex; BRG1-SIN3A complex; BRM-SIN3A complex; SIN3-ING1b complex II; LARC complex (LCR-associated remodeling complex); BRG1-SIN3A-HDAC containi…	10; 19; 22; 10; 19; 7; 14; 15; 16; 19; 11; 12; 14; 22; 10; 10; 28; 10; 4; 7; 4; 38; 38; 38; 8; 3; 22	3; 8; 6; 4; 8; 5; 6; 6; 5; 5; 4; 5; 3; 6; 4; 5; 6; 4; 2; 1; 2; 6; 6; 6; 3; 1; 6	86; 149; 189; 238; 556; 570; 713; 714; 739; 778; 803; 806; 1230; 1237; 1239; 1252; 1257; 1413; 2852; 3060; 3062; 3064; 3065; 3066; 3067; 5293; 5614
88	SMARCB1	-1.30054	-1.23026	0.000229204	0.00156936	-0.985236	-1.64254	583	3	SMARCB1_1; SMARCB1_3; SMARCB1_4	4	6598	Q12824	32	6598	6601	Q8TAQ2	SMARCB1	SMARCC2	3.66656e-31	6.7545e-10	1	7	27	NUMAC complex (nucleosomal methylation activator complex); PBAF complex (Polybromo- and BAF containing complex); BAF complex; SWI-SNF chromatin remodeling-related-BRCA1 complex; PBAF complex (Polybromo- and BAF containing complex); p300-CBP-p270-SWI/SNF complex; BRG1-SIN3A complex; BRM-SIN3A complex; SIN3-ING1b complex II; LARC complex (LCR-associated remodeling complex); BRG1-SIN3A-HDAC containi…	10; 19; 22; 10; 19; 7; 14; 15; 16; 19; 11; 12; 14; 22; 10; 10; 28; 10; 4; 7; 4; 38; 38; 38; 8; 3; 22	3; 8; 6; 4; 8; 5; 6; 6; 5; 5; 4; 5; 3; 6; 4; 5; 6; 4; 2; 1; 2; 6; 6; 6; 3; 1; 6	86; 149; 189; 238; 556; 570; 713; 714; 739; 778; 803; 806; 1230; 1237; 1239; 1252; 1257; 1413; 2852; 3060; 3062; 3064; 3065; 3066; 3067; 5293; 5614
89	SMARCB1	-1.30054	-1.23026	0.000229204	0.00156936	-0.985236	-1.64254	583	3	SMARCB1_1; SMARCB1_3; SMARCB1_4	4	6598	Q12824	32	6598	196528	Q68CP9	SMARCB1	ARID2	1.19744e-12	3.20431e-05	0.999968	7	27	NUMAC complex (nucleosomal methylation activator complex); PBAF complex (Polybromo- and BAF containing complex); BAF complex; SWI-SNF chromatin remodeling-related-BRCA1 complex; PBAF complex (Polybromo- and BAF containing complex); p300-CBP-p270-SWI/SNF complex; BRG1-SIN3A complex; BRM-SIN3A complex; SIN3-ING1b complex II; LARC complex (LCR-associated remodeling complex); BRG1-SIN3A-HDAC containi…	10; 19; 22; 10; 19; 7; 14; 15; 16; 19; 11; 12; 14; 22; 10; 10; 28; 10; 4; 7; 4; 38; 38; 38; 8; 3; 22	3; 8; 6; 4; 8; 5; 6; 6; 5; 5; 4; 5; 3; 6; 4; 5; 6; 4; 2; 1; 2; 6; 6; 6; 3; 1; 6	86; 149; 189; 238; 556; 570; 713; 714; 739; 778; 803; 806; 1230; 1237; 1239; 1252; 1257; 1413; 2852; 3060; 3062; 3064; 3065; 3066; 3067; 5293; 5614
90	SMARCB1	-1.30054	-1.23026	0.000229204	0.00156936	-0.985236	-1.64254	583	3	SMARCB1_1; SMARCB1_3; SMARCB1_4	4	6598	Q12824	32	6598	6603	Q92925	SMARCB1	SMARCD2	2.9535e-14	3.38249e-05	0.999966	7	27	NUMAC complex (nucleosomal methylation activator complex); PBAF complex (Polybromo- and BAF containing complex); BAF complex; SWI-SNF chromatin remodeling-related-BRCA1 complex; PBAF complex (Polybromo- and BAF containing complex); p300-CBP-p270-SWI/SNF complex; BRG1-SIN3A complex; BRM-SIN3A complex; SIN3-ING1b complex II; LARC complex (LCR-associated remodeling complex); BRG1-SIN3A-HDAC containi…	10; 19; 22; 10; 19; 7; 14; 15; 16; 19; 11; 12; 14; 22; 10; 10; 28; 10; 4; 7; 4; 38; 38; 38; 8; 3; 22	3; 8; 6; 4; 8; 5; 6; 6; 5; 5; 4; 5; 3; 6; 4; 5; 6; 4; 2; 1; 2; 6; 6; 6; 3; 1; 6	86; 149; 189; 238; 556; 570; 713; 714; 739; 778; 803; 806; 1230; 1237; 1239; 1252; 1257; 1413; 2852; 3060; 3062; 3064; 3065; 3066; 3067; 5293; 5614
91	SMARCB1	-1.30054	-1.23026	0.000229204	0.00156936	-0.985236	-1.64254	583	3	SMARCB1_1; SMARCB1_3; SMARCB1_4	4	6598	Q12824	32	6598	55193	Q86U86	SMARCB1	PBRM1	7.8921e-16	3.18101e-05	0.999968	7	27	NUMAC complex (nucleosomal methylation activator complex); PBAF complex (Polybromo- and BAF containing complex); BAF complex; SWI-SNF chromatin remodeling-related-BRCA1 complex; PBAF complex (Polybromo- and BAF containing complex); p300-CBP-p270-SWI/SNF complex; BRG1-SIN3A complex; BRM-SIN3A complex; SIN3-ING1b complex II; LARC complex (LCR-associated remodeling complex); BRG1-SIN3A-HDAC containi…	10; 19; 22; 10; 19; 7; 14; 15; 16; 19; 11; 12; 14; 22; 10; 10; 28; 10; 4; 7; 4; 38; 38; 38; 8; 3; 22	3; 8; 6; 4; 8; 5; 6; 6; 5; 5; 4; 5; 3; 6; 4; 5; 6; 4; 2; 1; 2; 6; 6; 6; 3; 1; 6	86; 149; 189; 238; 556; 570; 713; 714; 739; 778; 803; 806; 1230; 1237; 1239; 1252; 1257; 1413; 2852; 3060; 3062; 3064; 3065; 3066; 3067; 5293; 5614
92	SMARCB1	-1.30054	-1.23026	0.000229204	0.00156936	-0.985236	-1.64254	583	3	SMARCB1_1; SMARCB1_3; SMARCB1_4	4	6598	Q12824	32	6598	29117	Q9NPI1	SMARCB1	BRD7	7.53869e-15	1.08392e-07	1	7	27	NUMAC complex (nucleosomal methylation activator complex); PBAF complex (Polybromo- and BAF containing complex); BAF complex; SWI-SNF chromatin remodeling-related-BRCA1 complex; PBAF complex (Polybromo- and BAF containing complex); p300-CBP-p270-SWI/SNF complex; BRG1-SIN3A complex; BRM-SIN3A complex; SIN3-ING1b complex II; LARC complex (LCR-associated remodeling complex); BRG1-SIN3A-HDAC containi…	10; 19; 22; 10; 19; 7; 14; 15; 16; 19; 11; 12; 14; 22; 10; 10; 28; 10; 4; 7; 4; 38; 38; 38; 8; 3; 22	3; 8; 6; 4; 8; 5; 6; 6; 5; 5; 4; 5; 3; 6; 4; 5; 6; 4; 2; 1; 2; 6; 6; 6; 3; 1; 6	86; 149; 189; 238; 556; 570; 713; 714; 739; 778; 803; 806; 1230; 1237; 1239; 1252; 1257; 1413; 2852; 3060; 3062; 3064; 3065; 3066; 3067; 5293; 5614
93	SMARCB1	-1.30054	-1.23026	0.000229204	0.00156936	-0.985236	-1.64254	583	3	SMARCB1_1; SMARCB1_3; SMARCB1_4	4	6598	Q12824	32	6598	11060	O00308	SMARCB1	WWP2	1.17371e-16	0.080806	0.919194	7	27	NUMAC complex (nucleosomal methylation activator complex); PBAF complex (Polybromo- and BAF containing complex); BAF complex; SWI-SNF chromatin remodeling-related-BRCA1 complex; PBAF complex (Polybromo- and BAF containing complex); p300-CBP-p270-SWI/SNF complex; BRG1-SIN3A complex; BRM-SIN3A complex; SIN3-ING1b complex II; LARC complex (LCR-associated remodeling complex); BRG1-SIN3A-HDAC containi…	10; 19; 22; 10; 19; 7; 14; 15; 16; 19; 11; 12; 14; 22; 10; 10; 28; 10; 4; 7; 4; 38; 38; 38; 8; 3; 22	3; 8; 6; 4; 8; 5; 6; 6; 5; 5; 4; 5; 3; 6; 4; 5; 6; 4; 2; 1; 2; 6; 6; 6; 3; 1; 6	86; 149; 189; 238; 556; 570; 713; 714; 739; 778; 803; 806; 1230; 1237; 1239; 1252; 1257; 1413; 2852; 3060; 3062; 3064; 3065; 3066; 3067; 5293; 5614
94	SETD1B	-1.28627	-1.30889	5.10214e-06	0.000104375	-0.996054	-1.66058	12	3	SETD1B_2; SETD1B_3; SETD1B_1	4	23067	Q9UPS6	36	23067	1616	Q9UER7	SETD1B	DAXX	3.46425e-09	0.000169882	0.99983	5	2	Set1B complex; Set1B complex	18; 18	9; 9	2730; 6470
95	SETD1B	-1.28627	-1.30889	5.10214e-06	0.000104375	-0.996054	-1.66058	12	3	SETD1B_2; SETD1B_3; SETD1B_1	4	23067	Q9UPS6	36	23067	5305	P48426	SETD1B	PIP4K2A	5.31101e-10	5.99761e-05	0.99994	5	2	Set1B complex; Set1B complex	18; 18	9; 9	2730; 6470
96	SETD1B	-1.28627	-1.30889	5.10214e-06	0.000104375	-0.996054	-1.66058	12	3	SETD1B_2; SETD1B_3; SETD1B_1	4	23067	Q9UPS6	36	23067	30827	Q9P0U4	SETD1B	CXXC1	3.10697e-10	1.3895e-07	1	5	2	Set1B complex; Set1B complex	18; 18	9; 9	2730; 6470
97	SETD1B	-1.28627	-1.30889	5.10214e-06	0.000104375	-0.996054	-1.66058	12	3	SETD1B_2; SETD1B_3; SETD1B_1	4	23067	Q9UPS6	36	23067	5929	Q15291	SETD1B	RBBP5	5.28856e-08	6.62007e-08	1	5	2	Set1B complex; Set1B complex	18; 18	9; 9	2730; 6470
98	SETD1B	-1.28627	-1.30889	5.10214e-06	0.000104375	-0.996054	-1.66058	12	3	SETD1B_2; SETD1B_3; SETD1B_1	4	23067	Q9UPS6	36	23067	9070	Q9UBL3	SETD1B	ASH2L	1.95636e-11	1.17415e-07	1	5	2	Set1B complex; Set1B complex	18; 18	9; 9	2730; 6470
99	VPS18	-1.28539	-1.24788	3.87003e-07	1.479e-05	-0.996309	-1.7883	0	4	VPS18_2; VPS18_4; VPS18_1; VPS18_3	4	57617	Q9P253	37	57617	9392	Q8WUH2	VPS18	TGFBRAP1	1.94701e-11	9.80787e-07	0.999999	3	7	Class C Vps complex (VPS11, VPS18, STX7); Class C Vps complex (VPS11, VPS18, VPS16); Class C VPS/HOPS complex; Hook1-Vps18 complex; FTS-Vps18 complex; CORVET complex; HOPS complex	3; 3; 6; 2; 2; 6; 6	1; 2; 2; 1; 1; 5; 4	943; 944; 2573; 6117; 6125; 6388; 6389
100	VPS18	-1.28539	-1.24788	3.87003e-07	1.479e-05	-0.996309	-1.7883	0	4	VPS18_2; VPS18_4; VPS18_1; VPS18_3	4	57617	Q9P253	37	57617	27072	P49754	VPS18	VPS41	1.58092e-11	1.19471e-07	1	3	7	Class C Vps complex (VPS11, VPS18, STX7); Class C Vps complex (VPS11, VPS18, VPS16); Class C VPS/HOPS complex; Hook1-Vps18 complex; FTS-Vps18 complex; CORVET complex; HOPS complex	3; 3; 6; 2; 2; 6; 6	1; 2; 2; 1; 1; 5; 4	943; 944; 2573; 6117; 6125; 6388; 6389
101	VPS18	-1.28539	-1.24788	3.87003e-07	1.479e-05	-0.996309	-1.7883	0	4	VPS18_2; VPS18_4; VPS18_1; VPS18_3	4	57617	Q9P253	37	57617	84191	Q9H5X1	VPS18	FAM96A	7.40717e-10	0.00716776	0.992832	3	7	Class C Vps complex (VPS11, VPS18, STX7); Class C Vps complex (VPS11, VPS18, VPS16); Class C VPS/HOPS complex; Hook1-Vps18 complex; FTS-Vps18 complex; CORVET complex; HOPS complex	3; 3; 6; 2; 2; 6; 6	1; 2; 2; 1; 1; 5; 4	943; 944; 2573; 6117; 6125; 6388; 6389
102	PPP2R1A	-1.28454	-1.11624	1.68763e-05	0.00028101	-0.994393	-1.65781	42	3	PPP2R1A_4; PPP2R1A_3; PPP2R1A_1	4	5518	P30153	38	5518	2235	P22830	PPP2R1A	FECH	5.56282e-26	3.28859e-06	0.999997	7	8	RFC2-RIalpha complex; RFC2-RIalpha complex; RAF1-PPP2-PIN1 complex; PPP2R1A-PPP2R1B-PPP2CA-PPME1-EIF4A1 complex; PPP2R1A-PPP2R3B complex; PP2A A/C-striatin complex; PP2A A/C-SG2NA complex; PP2A-NR3A complex	4; 4; 5; 5; 2; 3; 3; 4	2; 2; 2; 2; 1; 2; 1; 2	1131; 1132; 5211; 5876; 6180; 6182; 6183; 7005
103	PPP2R1A	-1.28454	-1.11624	1.68763e-05	0.00028101	-0.994393	-1.65781	42	3	PPP2R1A_4; PPP2R1A_3; PPP2R1A_1	4	5518	P30153	38	5518	5520	P63151	PPP2R1A	PPP2R2A	1.2573e-10	0.0313602	0.96864	7	8	RFC2-RIalpha complex; RFC2-RIalpha complex; RAF1-PPP2-PIN1 complex; PPP2R1A-PPP2R1B-PPP2CA-PPME1-EIF4A1 complex; PPP2R1A-PPP2R3B complex; PP2A A/C-striatin complex; PP2A A/C-SG2NA complex; PP2A-NR3A complex	4; 4; 5; 5; 2; 3; 3; 4	2; 2; 2; 2; 1; 2; 1; 2	1131; 1132; 5211; 5876; 6180; 6182; 6183; 7005
104	PPP2R1A	-1.28454	-1.11624	1.68763e-05	0.00028101	-0.994393	-1.65781	42	3	PPP2R1A_4; PPP2R1A_3; PPP2R1A_1	4	5518	P30153	38	5518	25843	Q9Y3A3	PPP2R1A	MOB4	2.11216e-11	8.04365e-06	0.999992	7	8	RFC2-RIalpha complex; RFC2-RIalpha complex; RAF1-PPP2-PIN1 complex; PPP2R1A-PPP2R1B-PPP2CA-PPME1-EIF4A1 complex; PPP2R1A-PPP2R3B complex; PP2A A/C-striatin complex; PP2A A/C-SG2NA complex; PP2A-NR3A complex	4; 4; 5; 5; 2; 3; 3; 4	2; 2; 2; 2; 1; 2; 1; 2	1131; 1132; 5211; 5876; 6180; 6182; 6183; 7005
105	PPP2R1A	-1.28454	-1.11624	1.68763e-05	0.00028101	-0.994393	-1.65781	42	3	PPP2R1A_4; PPP2R1A_3; PPP2R1A_1	4	5518	P30153	38	5518	55012	Q969Q6	PPP2R1A	PPP2R3C	8.43185e-09	6.12714e-06	0.999994	7	8	RFC2-RIalpha complex; RFC2-RIalpha complex; RAF1-PPP2-PIN1 complex; PPP2R1A-PPP2R1B-PPP2CA-PPME1-EIF4A1 complex; PPP2R1A-PPP2R3B complex; PP2A A/C-striatin complex; PP2A A/C-SG2NA complex; PP2A-NR3A complex	4; 4; 5; 5; 2; 3; 3; 4	2; 2; 2; 2; 1; 2; 1; 2	1131; 1132; 5211; 5876; 6180; 6182; 6183; 7005
106	PPP2R1A	-1.28454	-1.11624	1.68763e-05	0.00028101	-0.994393	-1.65781	42	3	PPP2R1A_4; PPP2R1A_3; PPP2R1A_1	4	5518	P30153	38	5518	6801	O43815	PPP2R1A	STRN	2.37691e-29	1.29691e-09	1	7	8	RFC2-RIalpha complex; RFC2-RIalpha complex; RAF1-PPP2-PIN1 complex; PPP2R1A-PPP2R1B-PPP2CA-PPME1-EIF4A1 complex; PPP2R1A-PPP2R3B complex; PP2A A/C-striatin complex; PP2A A/C-SG2NA complex; PP2A-NR3A complex	4; 4; 5; 5; 2; 3; 3; 4	2; 2; 2; 2; 1; 2; 1; 2	1131; 1132; 5211; 5876; 6180; 6182; 6183; 7005
107	PPP2R1A	-1.28454	-1.11624	1.68763e-05	0.00028101	-0.994393	-1.65781	42	3	PPP2R1A_4; PPP2R1A_3; PPP2R1A_1	4	5518	P30153	38	5518	51400	Q9Y570	PPP2R1A	PPME1	3.21849e-21	3.42349e-07	1	7	8	RFC2-RIalpha complex; RFC2-RIalpha complex; RAF1-PPP2-PIN1 complex; PPP2R1A-PPP2R1B-PPP2CA-PPME1-EIF4A1 complex; PPP2R1A-PPP2R3B complex; PP2A A/C-striatin complex; PP2A A/C-SG2NA complex; PP2A-NR3A complex	4; 4; 5; 5; 2; 3; 3; 4	2; 2; 2; 2; 1; 2; 1; 2	1131; 1132; 5211; 5876; 6180; 6182; 6183; 7005
108	PPP2R1A	-1.28454	-1.11624	1.68763e-05	0.00028101	-0.994393	-1.65781	42	3	PPP2R1A_4; PPP2R1A_3; PPP2R1A_1	4	5518	P30153	38	5518	29844	P0C1Z6	PPP2R1A	TFPT	3.32237e-14	0.0784747	0.921525	7	8	RFC2-RIalpha complex; RFC2-RIalpha complex; RAF1-PPP2-PIN1 complex; PPP2R1A-PPP2R1B-PPP2CA-PPME1-EIF4A1 complex; PPP2R1A-PPP2R3B complex; PP2A A/C-striatin complex; PP2A A/C-SG2NA complex; PP2A-NR3A complex	4; 4; 5; 5; 2; 3; 3; 4	2; 2; 2; 2; 1; 2; 1; 2	1131; 1132; 5211; 5876; 6180; 6182; 6183; 7005
109	RARS	-1.27501	-1.27501	0.000175071	0.00130574	-0.996934	-1.50653	440	2	RARS_2; RARS_4	4	5917	P54136	40	5917	2058	P07814	RARS	EPRS	2.02589e-15	0.00431414	0.995686	4	1	Multisynthetase complex	11	4	3040
110	RARS	-1.27501	-1.27501	0.000175071	0.00130574	-0.996934	-1.50653	440	2	RARS_2; RARS_4	4	5917	P54136	40	5917	4141	P56192	RARS	MARS	1.44222e-14	0.0064729	0.993527	4	1	Multisynthetase complex	11	4	3040
111	RARS	-1.27501	-1.27501	0.000175071	0.00130574	-0.996934	-1.50653	440	2	RARS_2; RARS_4	4	5917	P54136	40	5917	84317	Q96NT0	RARS	CCDC115	3.54891e-14	0.0751325	0.924867	4	1	Multisynthetase complex	11	4	3040
112	RARS	-1.27501	-1.27501	0.000175071	0.00130574	-0.996934	-1.50653	440	2	RARS_2; RARS_4	4	5917	P54136	40	5917	3735	Q15046	RARS	KARS	2.34883e-29	5.04509e-05	0.99995	4	1	Multisynthetase complex	11	4	3040
113	STK11	-1.2257	-1.35359	5.92633e-05	0.000688267	-0.991128	-1.65237	150	3	STK11_2; STK11_4; STK11_3	4	6794	Q15831	44	6794	3557	P18510	STK11	IL1RN	3.62247e-06	0.03151	0.968486	3	2	LKB1-STRAD-MO25 complex; v-ATPase-Ragulator-AXIN/LKB1-AMPK complex	3; 14	1; 7	6053; 6888
114	STK11	-1.2257	-1.35359	5.92633e-05	0.000688267	-0.991128	-1.65237	150	3	STK11_2; STK11_4; STK11_3	4	6794	Q15831	44	6794	8533	Q9UNS2	STK11	COPS3	1.03505e-11	0.141507	0.858493	3	2	LKB1-STRAD-MO25 complex; v-ATPase-Ragulator-AXIN/LKB1-AMPK complex	3; 14	1; 7	6053; 6888
115	STK11	-1.2257	-1.35359	5.92633e-05	0.000688267	-0.991128	-1.65237	150	3	STK11_2; STK11_4; STK11_3	4	6794	Q15831	44	6794	5305	P48426	STK11	PIP4K2A	0.0104708	0.00842403	0.981105	3	2	LKB1-STRAD-MO25 complex; v-ATPase-Ragulator-AXIN/LKB1-AMPK complex	3; 14	1; 7	6053; 6888
116	FARSB	-1.2193	-1.15751	0.000116957	0.000996917	-0.98836	-1.64775	297	3	FARSB_4; FARSB_1; FARSB_2	4	10056	Q9NSD9	47	10056	2193	Q9Y285	FARSB	FARSA	5.60266e-25	1.33084e-09	1	2
117	FARSB	-1.2193	-1.15751	0.000116957	0.000996917	-0.98836	-1.64775	297	3	FARSB_4; FARSB_1; FARSB_2	4	10056	Q9NSD9	47	10056	55845	Q8WUW1	FARSB	BRK1	9.32813e-13	0.00375902	0.996241	2
118	UTY	-1.20676	-1.35026	0.000124806	0.00105131	-0.988189	-1.64747	317	3	UTY_1; UTY_2; UTY_4	4	7404	O14607	48	7404	79447	Q9BTK6	UTY	PAGR1	0.0703029	6.04358e-08	0.929697	1
119	PSMD4	-1.19198	-1.19198	0.00287378	0.00737501	-0.985506	-1.48926	7238	2	PSMD4_1; PSMD4_2	4	5710	P55036	51	5710	5717	O00231	PSMD4	PSMD11	4.64965e-09	0.0247548	0.975245	2	3	PA700 complex; 26S proteasome; PA700-20S-PA28 complex	20; 22; 36	3; 3; 4	32; 181; 193
120	PSMD4	-1.19198	-1.19198	0.00287378	0.00737501	-0.985506	-1.48926	7238	2	PSMD4_1; PSMD4_2	4	5710	P55036	51	5710	5719	Q9UNM6	PSMD4	PSMD13	2.29964e-25	2.92072e-07	1	2	3	PA700 complex; 26S proteasome; PA700-20S-PA28 complex	20; 22; 36	3; 3; 4	32; 181; 193
121	GPN2	-1.19147	-1.3011	5.80859e-05	0.000688267	-0.991184	-1.65246	147	3	GPN2_3; GPN2_4; GPN2_1	4	54707	Q9H9Y4	52	54707	5431	P30876	GPN2	POLR2B	2.51272e-18	0.105661	0.894339	1
122	BRD8	-1.18954	-1.18954	0.000917037	0.00358797	-0.992349	-1.4996	2309	2	BRD8_3; BRD8_2	4	10902	Q9H0E9	53	10902	55257	Q9NV56	BRD8	MRGBP	6.94949e-20	4.4288e-11	1	4	6	NuA4/Tip60-HAT complex; NuA4/Tip60-HAT complex; NuA4/Tip60-HAT complex A; DMAP1-associated complex; NuA4/Tip60 HAT complex; NuA4/Tip60 HAT complex	31; 31; 15; 10; 24; 24	6; 6; 4; 2; 5; 5	528; 529; 798; 799; 2856; 2857
123	BRD8	-1.18954	-1.18954	0.000917037	0.00358797	-0.992349	-1.4996	2309	2	BRD8_3; BRD8_2	4	10902	Q9H0E9	53	10902	51194	Q9UI26	BRD8	IPO11	1.58614e-11	0.000441122	0.999559	4	6	NuA4/Tip60-HAT complex; NuA4/Tip60-HAT complex; NuA4/Tip60-HAT complex A; DMAP1-associated complex; NuA4/Tip60 HAT complex; NuA4/Tip60 HAT complex	31; 31; 15; 10; 24; 24	6; 6; 4; 2; 5; 5	528; 529; 798; 799; 2856; 2857
124	BRD8	-1.18954	-1.18954	0.000917037	0.00358797	-0.992349	-1.4996	2309	2	BRD8_3; BRD8_2	4	10902	Q9H0E9	53	10902	54799	Q05BQ5	BRD8	MBTD1	0.0132958	0.0094699	0.977234	4	6	NuA4/Tip60-HAT complex; NuA4/Tip60-HAT complex; NuA4/Tip60-HAT complex A; DMAP1-associated complex; NuA4/Tip60 HAT complex; NuA4/Tip60 HAT complex	31; 31; 15; 10; 24; 24	6; 6; 4; 2; 5; 5	528; 529; 798; 799; 2856; 2857
125	BRD8	-1.18954	-1.18954	0.000917037	0.00358797	-0.992349	-1.4996	2309	2	BRD8_3; BRD8_2	4	10902	Q9H0E9	53	10902	26122	Q52LR7	BRD8	EPC2	5.70942e-08	0.000407023	0.999593	4	6	NuA4/Tip60-HAT complex; NuA4/Tip60-HAT complex; NuA4/Tip60-HAT complex A; DMAP1-associated complex; NuA4/Tip60 HAT complex; NuA4/Tip60 HAT complex	31; 31; 15; 10; 24; 24	6; 6; 4; 2; 5; 5	528; 529; 798; 799; 2856; 2857
126	DYRK1A	-1.18103	-1.14467	2.32202e-06	6.39449e-05	-0.989793	-1.7766	5	4	DYRK1A_3; DYRK1A_2; DYRK1A_1; DYRK1A_4	4	1859	Q13627	54	1859	5573	P10644	DYRK1A	PRKAR1A	7.99549e-08	2.14639e-06	0.999998	1
127	MIDN	-1.16387	-1.11179	3.87003e-07	1.479e-05	-0.99567	-1.78715	0	4	MIDN_2; MIDN_3; MIDN_4; MIDN_1	4	90007	Q504T8	55	90007	1958	P18146	MIDN	EGR1	4.80122e-08	7.65391e-08	1	1
128	ALG2	-1.15809	-1.00415	0.00104123	0.00388292	-0.972986	-1.62212	2652	3	ALG2_4; ALG2_1; ALG2_3	4	85365	Q9H553	56	85365	55004	Q6IAA8	ALG2	LAMTOR1	4.97142e-09	1.02163e-07	1	1
129	TRAF3	-1.15544	-1.14601	0.000330069	0.00190588	-0.983121	-1.63902	840	3	TRAF3_2; TRAF3_3; TRAF3_1	4	7187	Q13114	57	7187	9342	O95721	TRAF3	SNAP29	1.71175e-11	2.62962e-06	0.999997	2	1	TANK-TRAF2-TRAF3 complex	3	2	5210
130	TRAF3	-1.15544	-1.14601	0.000330069	0.00190588	-0.983121	-1.63902	840	3	TRAF3_2; TRAF3_3; TRAF3_1	4	7187	Q13114	57	7187	1618	Q92904	TRAF3	DAZL	0.000210985	0.00946096	0.990328	2	1	TANK-TRAF2-TRAF3 complex	3	2	5210
131	LAMTOR3	-1.15051	-1.30587	0.00102435	0.00383998	-0.97317	-1.62243	2609	3	LAMTOR3_1; LAMTOR3_3; LAMTOR3_2	4	8649	Q9UHA4	58	8649	57521	Q8N122	LAMTOR3	RPTOR	9.32165e-11	0.000994037	0.999006	10	3	p14-Mp1-MEK1 complex; p14-Mp1-ERK2 complex; v-ATPase-Ragulator-AXIN/LKB1-AMPK complex	3; 3; 14	2; 2; 7	5222; 5226; 6888
132	LAMTOR3	-1.15051	-1.30587	0.00102435	0.00383998	-0.97317	-1.62243	2609	3	LAMTOR3_1; LAMTOR3_3; LAMTOR3_2	4	8649	Q9UHA4	58	8649	55004	Q6IAA8	LAMTOR3	LAMTOR1	2.21518e-23	1.13937e-05	0.999989	10	3	p14-Mp1-MEK1 complex; p14-Mp1-ERK2 complex; v-ATPase-Ragulator-AXIN/LKB1-AMPK complex	3; 3; 14	2; 2; 7	5222; 5226; 6888
133	LAMTOR3	-1.15051	-1.30587	0.00102435	0.00383998	-0.97317	-1.62243	2609	3	LAMTOR3_1; LAMTOR3_3; LAMTOR3_2	4	8649	Q9UHA4	58	8649	28956	Q9Y2Q5	LAMTOR3	LAMTOR2	7.84671e-20	1.64263e-05	0.999984	10	3	p14-Mp1-MEK1 complex; p14-Mp1-ERK2 complex; v-ATPase-Ragulator-AXIN/LKB1-AMPK complex	3; 3; 14	2; 2; 7	5222; 5226; 6888
134	LAMTOR3	-1.15051	-1.30587	0.00102435	0.00383998	-0.97317	-1.62243	2609	3	LAMTOR3_1; LAMTOR3_3; LAMTOR3_2	4	8649	Q9UHA4	58	8649	118426	Q969J3	LAMTOR3	LOH12CR1	2.82267e-09	0.00852068	0.991479	10	3	p14-Mp1-MEK1 complex; p14-Mp1-ERK2 complex; v-ATPase-Ragulator-AXIN/LKB1-AMPK complex	3; 3; 14	2; 2; 7	5222; 5226; 6888
135	LAMTOR3	-1.15051	-1.30587	0.00102435	0.00383998	-0.97317	-1.62243	2609	3	LAMTOR3_1; LAMTOR3_3; LAMTOR3_2	4	8649	Q9UHA4	58	8649	10542	O43504	LAMTOR3	LAMTOR5	1.61957e-21	0.000181307	0.999819	10	3	p14-Mp1-MEK1 complex; p14-Mp1-ERK2 complex; v-ATPase-Ragulator-AXIN/LKB1-AMPK complex	3; 3; 14	2; 2; 7	5222; 5226; 6888
136	LAMTOR3	-1.15051	-1.30587	0.00102435	0.00383998	-0.97317	-1.62243	2609	3	LAMTOR3_1; LAMTOR3_3; LAMTOR3_2	4	8649	Q9UHA4	58	8649	23557	O95295	LAMTOR3	SNAPIN	1.50008e-05	0.179738	0.820247	10	3	p14-Mp1-MEK1 complex; p14-Mp1-ERK2 complex; v-ATPase-Ragulator-AXIN/LKB1-AMPK complex	3; 3; 14	2; 2; 7	5222; 5226; 6888
137	LAMTOR3	-1.15051	-1.30587	0.00102435	0.00383998	-0.97317	-1.62243	2609	3	LAMTOR3_1; LAMTOR3_3; LAMTOR3_2	4	8649	Q9UHA4	58	8649	54785	Q96GS4	LAMTOR3	C17orf59	9.0985e-24	0.000243999	0.999756	10	3	p14-Mp1-MEK1 complex; p14-Mp1-ERK2 complex; v-ATPase-Ragulator-AXIN/LKB1-AMPK complex	3; 3; 14	2; 2; 7	5222; 5226; 6888
138	LAMTOR3	-1.15051	-1.30587	0.00102435	0.00383998	-0.97317	-1.62243	2609	3	LAMTOR3_1; LAMTOR3_3; LAMTOR3_2	4	8649	Q9UHA4	58	8649	10670	Q7L523	LAMTOR3	RRAGA	1.81709e-10	2.68936e-09	1	10	3	p14-Mp1-MEK1 complex; p14-Mp1-ERK2 complex; v-ATPase-Ragulator-AXIN/LKB1-AMPK complex	3; 3; 14	2; 2; 7	5222; 5226; 6888
139	LAMTOR3	-1.15051	-1.30587	0.00102435	0.00383998	-0.97317	-1.62243	2609	3	LAMTOR3_1; LAMTOR3_3; LAMTOR3_2	4	8649	Q9UHA4	58	8649	389541	Q0VGL1	LAMTOR3	LAMTOR4	3.54149e-21	6.62686e-13	1	10	3	p14-Mp1-MEK1 complex; p14-Mp1-ERK2 complex; v-ATPase-Ragulator-AXIN/LKB1-AMPK complex	3; 3; 14	2; 2; 7	5222; 5226; 6888
140	LAMTOR3	-1.15051	-1.30587	0.00102435	0.00383998	-0.97317	-1.62243	2609	3	LAMTOR3_1; LAMTOR3_3; LAMTOR3_2	4	8649	Q9UHA4	58	8649	119032	Q96B45	LAMTOR3	C10orf32	3.09285e-10	0.0254415	0.974558	10	3	p14-Mp1-MEK1 complex; p14-Mp1-ERK2 complex; v-ATPase-Ragulator-AXIN/LKB1-AMPK complex	3; 3; 14	2; 2; 7	5222; 5226; 6888
141	ASH2L	-1.1201	-1.1201	0.000313619	0.00185579	-0.995798	-1.50481	789	2	ASH2L_4; ASH2L_3	4	9070	Q9UBL3	61	9070	84661	Q9C005	ASH2L	DPY30	1.00181e-13	0.0257097	0.97429	6	20	Menin-associated histone methyltransferase complex; MLL-HCF complex; ASCOM complex; HCF-1 complex; Set1B complex; Set1A complex; UTX-MLL2/3 complex; PTIP-HMT complex; MLL1-WDR5 complex; MLL1 core complex; MLL2 complex; MLL3 complex; MLL1 complex; MLL4 complex; Set1A complex; Set1B complex; NIF1-ASH2L-RBBP5-WDR5 complex; WRAD complex (WDR5, RBBP5, ASH2L, DPY30); WRA complex (WDR5, RBBP5, ASH2L); A…	7; 7; 7; 18; 18; 16; 12; 10; 27; 4; 10; 9; 8; 9; 16; 18; 4; 4; 3; 4	4; 2; 3; 4; 9; 7; 4; 6; 5; 2; 3; 6; 3; 5; 7; 9; 2; 3; 2; 2	1254; 1256; 1400; 2721; 2730; 2731; 3075; 5195; 5386; 6457; 6460; 6461; 6462; 6467; 6469; 6470; 6845; 6849; 6850; 7367
142	ASH2L	-1.1201	-1.1201	0.000313619	0.00185579	-0.995798	-1.50481	789	2	ASH2L_4; ASH2L_3	4	9070	Q9UBL3	61	9070	58508	Q8NEZ4	ASH2L	KMT2C	1.50636e-10	4.09829e-08	1	6	20	Menin-associated histone methyltransferase complex; MLL-HCF complex; ASCOM complex; HCF-1 complex; Set1B complex; Set1A complex; UTX-MLL2/3 complex; PTIP-HMT complex; MLL1-WDR5 complex; MLL1 core complex; MLL2 complex; MLL3 complex; MLL1 complex; MLL4 complex; Set1A complex; Set1B complex; NIF1-ASH2L-RBBP5-WDR5 complex; WRAD complex (WDR5, RBBP5, ASH2L, DPY30); WRA complex (WDR5, RBBP5, ASH2L); A…	7; 7; 7; 18; 18; 16; 12; 10; 27; 4; 10; 9; 8; 9; 16; 18; 4; 4; 3; 4	4; 2; 3; 4; 9; 7; 4; 6; 5; 2; 3; 6; 3; 5; 7; 9; 2; 3; 2; 2	1254; 1256; 1400; 2721; 2730; 2731; 3075; 5195; 5386; 6457; 6460; 6461; 6462; 6467; 6469; 6470; 6845; 6849; 6850; 7367
143	ASH2L	-1.1201	-1.1201	0.000313619	0.00185579	-0.995798	-1.50481	789	2	ASH2L_4; ASH2L_3	4	9070	Q9UBL3	61	9070	23067	Q9UPS6	ASH2L	SETD1B	1.95636e-11	1.17415e-07	1	6	20	Menin-associated histone methyltransferase complex; MLL-HCF complex; ASCOM complex; HCF-1 complex; Set1B complex; Set1A complex; UTX-MLL2/3 complex; PTIP-HMT complex; MLL1-WDR5 complex; MLL1 core complex; MLL2 complex; MLL3 complex; MLL1 complex; MLL4 complex; Set1A complex; Set1B complex; NIF1-ASH2L-RBBP5-WDR5 complex; WRAD complex (WDR5, RBBP5, ASH2L, DPY30); WRA complex (WDR5, RBBP5, ASH2L); A…	7; 7; 7; 18; 18; 16; 12; 10; 27; 4; 10; 9; 8; 9; 16; 18; 4; 4; 3; 4	4; 2; 3; 4; 9; 7; 4; 6; 5; 2; 3; 6; 3; 5; 7; 9; 2; 3; 2; 2	1254; 1256; 1400; 2721; 2730; 2731; 3075; 5195; 5386; 6457; 6460; 6461; 6462; 6467; 6469; 6470; 6845; 6849; 6850; 7367
144	ASH2L	-1.1201	-1.1201	0.000313619	0.00185579	-0.995798	-1.50481	789	2	ASH2L_4; ASH2L_3	4	9070	Q9UBL3	61	9070	22976	Q6ZW49	ASH2L	PAXIP1	9.02451e-12	3.69634e-06	0.999996	6	20	Menin-associated histone methyltransferase complex; MLL-HCF complex; ASCOM complex; HCF-1 complex; Set1B complex; Set1A complex; UTX-MLL2/3 complex; PTIP-HMT complex; MLL1-WDR5 complex; MLL1 core complex; MLL2 complex; MLL3 complex; MLL1 complex; MLL4 complex; Set1A complex; Set1B complex; NIF1-ASH2L-RBBP5-WDR5 complex; WRAD complex (WDR5, RBBP5, ASH2L, DPY30); WRA complex (WDR5, RBBP5, ASH2L); A…	7; 7; 7; 18; 18; 16; 12; 10; 27; 4; 10; 9; 8; 9; 16; 18; 4; 4; 3; 4	4; 2; 3; 4; 9; 7; 4; 6; 5; 2; 3; 6; 3; 5; 7; 9; 2; 3; 2; 2	1254; 1256; 1400; 2721; 2730; 2731; 3075; 5195; 5386; 6457; 6460; 6461; 6462; 6467; 6469; 6470; 6845; 6849; 6850; 7367
145	ASH2L	-1.1201	-1.1201	0.000313619	0.00185579	-0.995798	-1.50481	789	2	ASH2L_4; ASH2L_3	4	9070	Q9UBL3	61	9070	30827	Q9P0U4	ASH2L	CXXC1	1.07228e-23	6.85072e-09	1	6	20	Menin-associated histone methyltransferase complex; MLL-HCF complex; ASCOM complex; HCF-1 complex; Set1B complex; Set1A complex; UTX-MLL2/3 complex; PTIP-HMT complex; MLL1-WDR5 complex; MLL1 core complex; MLL2 complex; MLL3 complex; MLL1 complex; MLL4 complex; Set1A complex; Set1B complex; NIF1-ASH2L-RBBP5-WDR5 complex; WRAD complex (WDR5, RBBP5, ASH2L, DPY30); WRA complex (WDR5, RBBP5, ASH2L); A…	7; 7; 7; 18; 18; 16; 12; 10; 27; 4; 10; 9; 8; 9; 16; 18; 4; 4; 3; 4	4; 2; 3; 4; 9; 7; 4; 6; 5; 2; 3; 6; 3; 5; 7; 9; 2; 3; 2; 2	1254; 1256; 1400; 2721; 2730; 2731; 3075; 5195; 5386; 6457; 6460; 6461; 6462; 6467; 6469; 6470; 6845; 6849; 6850; 7367
146	ASH2L	-1.1201	-1.1201	0.000313619	0.00185579	-0.995798	-1.50481	789	2	ASH2L_4; ASH2L_3	4	9070	Q9UBL3	61	9070	5929	Q15291	ASH2L	RBBP5	2.15825e-30	1.61902e-07	1	6	20	Menin-associated histone methyltransferase complex; MLL-HCF complex; ASCOM complex; HCF-1 complex; Set1B complex; Set1A complex; UTX-MLL2/3 complex; PTIP-HMT complex; MLL1-WDR5 complex; MLL1 core complex; MLL2 complex; MLL3 complex; MLL1 complex; MLL4 complex; Set1A complex; Set1B complex; NIF1-ASH2L-RBBP5-WDR5 complex; WRAD complex (WDR5, RBBP5, ASH2L, DPY30); WRA complex (WDR5, RBBP5, ASH2L); A…	7; 7; 7; 18; 18; 16; 12; 10; 27; 4; 10; 9; 8; 9; 16; 18; 4; 4; 3; 4	4; 2; 3; 4; 9; 7; 4; 6; 5; 2; 3; 6; 3; 5; 7; 9; 2; 3; 2; 2	1254; 1256; 1400; 2721; 2730; 2731; 3075; 5195; 5386; 6457; 6460; 6461; 6462; 6467; 6469; 6470; 6845; 6849; 6850; 7367
147	ARPC2	-1.10419	-1.00375	0.000334386	0.00191537	-0.983065	-1.63892	851	3	ARPC2_1; ARPC2_4; ARPC2_3	4	10109	O15144	62	10109	10095	O15143	ARPC2	ARPC1B	6.04111e-16	0.00185438	0.998146	4	1	Arp2/3 protein complex	7	7	27
148	ARPC2	-1.10419	-1.00375	0.000334386	0.00191537	-0.983065	-1.63892	851	3	ARPC2_1; ARPC2_4; ARPC2_3	4	10109	O15144	62	10109	10094	O15145	ARPC2	ARPC3	1.9188e-12	0.00350757	0.996492	4	1	Arp2/3 protein complex	7	7	27
149	ARPC2	-1.10419	-1.00375	0.000334386	0.00191537	-0.983065	-1.63892	851	3	ARPC2_1; ARPC2_4; ARPC2_3	4	10109	O15144	62	10109	10096	P61158	ARPC2	ACTR3	9.17134e-14	0.00838678	0.991613	4	1	Arp2/3 protein complex	7	7	27
150	ARPC2	-1.10419	-1.00375	0.000334386	0.00191537	-0.983065	-1.63892	851	3	ARPC2_1; ARPC2_4; ARPC2_3	4	10109	O15144	62	10109	10093	P59998	ARPC2	ARPC4	8.39046e-13	9.47638e-05	0.999905	4	1	Arp2/3 protein complex	7	7	27
151	COL4A3BP	-1.09509	-1.09509	0.00115602	0.00411797	-0.991341	-1.49808	2911	2	COL4A3BP_2; COL4A3BP_1	4	10087	Q9Y5P4	63	10087	80230	Q96T51	COL4A3BP	RUFY1	1.72164e-06	0.00263639	0.997362	2
152	COL4A3BP	-1.09509	-1.09509	0.00115602	0.00411797	-0.991341	-1.49808	2911	2	COL4A3BP_2; COL4A3BP_1	4	10087	Q9Y5P4	63	10087	6814	O00186	COL4A3BP	STXBP3	4.84365e-08	6.19744e-07	0.999999	2
153	COMMD3	-1.09276	-1.1851	0.00192704	0.00556355	-0.965661	-1.60991	4909	3	COMMD3_3; COMMD3_1; COMMD3_2	3	23412	Q9UBI1	64	23412	57020	Q7Z3J2	COMMD3	C16orf62	5.38666e-10	1.13233e-06	0.999999	9	2	CCC-Wash (WASH1, FAM21C) complex; CCC complex	15; 13	9; 9	6639; 6645
154	COMMD3	-1.09276	-1.1851	0.00192704	0.00556355	-0.965661	-1.60991	4909	3	COMMD3_3; COMMD3_1; COMMD3_2	3	23412	Q9UBI1	64	23412	54520	Q567U6	COMMD3	CCDC93	1.25478e-13	2.64804e-07	1	9	2	CCC-Wash (WASH1, FAM21C) complex; CCC complex	15; 13	9; 9	6639; 6645
155	COMMD3	-1.09276	-1.1851	0.00192704	0.00556355	-0.965661	-1.60991	4909	3	COMMD3_3; COMMD3_1; COMMD3_2	3	23412	Q9UBI1	64	23412	54939	Q9H0A8	COMMD3	COMMD4	1.78349e-20	1.72831e-11	1	9	2	CCC-Wash (WASH1, FAM21C) complex; CCC complex	15; 13	9; 9	6639; 6645
156	COMMD3	-1.09276	-1.1851	0.00192704	0.00556355	-0.965661	-1.60991	4909	3	COMMD3_3; COMMD3_1; COMMD3_2	3	23412	Q9UBI1	64	23412	28991	Q9GZQ3	COMMD3	COMMD5	5.23369e-19	1.17922e-13	1	9	2	CCC-Wash (WASH1, FAM21C) complex; CCC complex	15; 13	9; 9	6639; 6645
157	COMMD3	-1.09276	-1.1851	0.00192704	0.00556355	-0.965661	-1.60991	4909	3	COMMD3_3; COMMD3_1; COMMD3_2	3	23412	Q9UBI1	64	23412	51699	Q9UBQ0	COMMD3	VPS29	3.71497e-23	0.00430585	0.995694	9	2	CCC-Wash (WASH1, FAM21C) complex; CCC complex	15; 13	9; 9	6639; 6645
158	COMMD3	-1.09276	-1.1851	0.00192704	0.00556355	-0.965661	-1.60991	4909	3	COMMD3_3; COMMD3_1; COMMD3_2	3	23412	Q9UBI1	64	23412	51397	Q9Y6G5	COMMD3	COMMD10	2.13204e-20	5.01911e-14	1	9	2	CCC-Wash (WASH1, FAM21C) complex; CCC complex	15; 13	9; 9	6639; 6645
159	COMMD3	-1.09276	-1.1851	0.00192704	0.00556355	-0.965661	-1.60991	4909	3	COMMD3_3; COMMD3_1; COMMD3_2	3	23412	Q9UBI1	64	23412	54951	Q9NX08	COMMD3	COMMD8	1.43025e-22	6.12647e-14	1	9	2	CCC-Wash (WASH1, FAM21C) complex; CCC complex	15; 13	9; 9	6639; 6645
160	COMMD3	-1.09276	-1.1851	0.00192704	0.00556355	-0.965661	-1.60991	4909	3	COMMD3_3; COMMD3_1; COMMD3_2	3	23412	Q9UBI1	64	23412	51122	Q86X83	COMMD3	COMMD2	8.96903e-17	1.42873e-11	1	9	2	CCC-Wash (WASH1, FAM21C) complex; CCC complex	15; 13	9; 9	6639; 6645
161	COMMD3	-1.09276	-1.1851	0.00192704	0.00556355	-0.965661	-1.60991	4909	3	COMMD3_3; COMMD3_1; COMMD3_2	3	23412	Q9UBI1	64	23412	28952	O60826	COMMD3	CCDC22	1.4349e-19	4.0857e-11	1	9	2	CCC-Wash (WASH1, FAM21C) complex; CCC complex	15; 13	9; 9	6639; 6645
162	FURIN	-1.06656	-1.06656	0.00135531	0.00453459	-0.990517	-1.49683	3413	2	FURIN_3; FURIN_1	4	5045	P09958	67	5045	57498	Q9ULH0	FURIN	KIDINS220	2.01958e-15	0.195364	0.804636	3	1	AP1G1-PACS1-FURIN complex	3	1	5165
163	FURIN	-1.06656	-1.06656	0.00135531	0.00453459	-0.990517	-1.49683	3413	2	FURIN_3; FURIN_1	4	5045	P09958	67	5045	22836	O94955	FURIN	RHOBTB3	1.29473e-06	0.00459555	0.995403	3	1	AP1G1-PACS1-FURIN complex	3	1	5165
164	FURIN	-1.06656	-1.06656	0.00135531	0.00453459	-0.990517	-1.49683	3413	2	FURIN_3; FURIN_1	4	5045	P09958	67	5045	23001	Q8IZQ1	FURIN	WDFY3	0.00100431	0.0448024	0.954193	3	1	AP1G1-PACS1-FURIN complex	3	1	5165
165	NAA35	-1.0541	-1.11456	4.86666e-05	0.00061132	-0.99171	-1.65334	123	3	NAA35_2; NAA35_4; NAA35_3	4	60560	Q5VZE5	69	60560	84316	Q9BRA0	NAA35	LSMD1	4.55785e-07	6.43355e-06	0.999993	2
166	NAA35	-1.0541	-1.11456	4.86666e-05	0.00061132	-0.99171	-1.65334	123	3	NAA35_2; NAA35_4; NAA35_3	4	60560	Q5VZE5	69	60560	122830	Q147X3	NAA35	NAA30	7.37569e-15	3.44203e-11	1	2
167	THOC1	-1.05388	-1.05388	0.00144463	0.00476662	-0.990134	-1.49625	3638	2	THOC1_2; THOC1_3	4	9984	Q96FV9	70	9984	8563	Q13769	THOC1	THOC5	4.32754e-13	3.67269e-05	0.999963	3	4	Spliceosome; TREX complex; THO complex; hTREX84 complex	143; 8; 5; 6	9; 3; 2; 3	351; 770; 774; 6160
168	THOC1	-1.05388	-1.05388	0.00144463	0.00476662	-0.990134	-1.49625	3638	2	THOC1_2; THOC1_3	4	9984	Q96FV9	70	9984	84324	P82979	THOC1	SARNP	5.11695e-16	0.233211	0.766789	3	4	Spliceosome; TREX complex; THO complex; hTREX84 complex	143; 8; 5; 6	9; 3; 2; 3	351; 770; 774; 6160
169	THOC1	-1.05388	-1.05388	0.00144463	0.00476662	-0.990134	-1.49625	3638	2	THOC1_2; THOC1_3	4	9984	Q96FV9	70	9984	84321	Q96J01	THOC1	THOC3	1.3741e-24	6.21035e-07	0.999999	3	4	Spliceosome; TREX complex; THO complex; hTREX84 complex	143; 8; 5; 6	9; 3; 2; 3	351; 770; 774; 6160
170	EIF3D	-1.04945	-1.04945	0.0107909	0.0176399	-0.969096	-1.46446	27181	2	EIF3D_3; EIF3D_2	4	8664	O15371	71	8664	8668	Q13347	EIF3D	EIF3I	6.49096e-31	3.55339e-06	0.999996	2	1	eIF3 complex (EIF3S6, EIF3S5, EIF3S4, EIF3S3, EIF3S6IP, EIF3S2, EIF3S9, EIF3S12, EIF3S10, EIF3S8, EIF3S1, EIF3S7, PCID1)	13	3	1097
171	EIF3D	-1.04945	-1.04945	0.0107909	0.0176399	-0.969096	-1.46446	27181	2	EIF3D_3; EIF3D_2	4	8664	O15371	71	8664	8667	O15372	EIF3D	EIF3H	2.66008e-12	0.000401542	0.999598	2	1	eIF3 complex (EIF3S6, EIF3S5, EIF3S4, EIF3S3, EIF3S6IP, EIF3S2, EIF3S9, EIF3S12, EIF3S10, EIF3S8, EIF3S1, EIF3S7, PCID1)	13	3	1097
172	CCDC22	-1.04841	-1.12881	0.000568508	0.00267797	-0.957753	-1.71909	1468	4	CCDC22_2; CCDC22_3; CCDC22_4; CCDC22_1	4	28952	O60826	72	28952	57020	Q7Z3J2	CCDC22	C16orf62	2.17638e-09	1.14228e-06	0.999999	11	8	CCC-Wash (WASH1, FAM21C) complex; CCDC22-COMMD1-CUL2 complex; CCC complex; CCDC22-COMMD8-CUL1 complex; Ubiquitin E3 ligase (CCDC22, COMMD8, CUL3); COMMD1-CCDC22-CCDC93-C16orf62 complex; CCDC22-CCDC93-C16orf62 complex; CCDC22-CCDC93-C16orf62-FAM21-WASH1 complex	15; 3; 13; 3; 3; 4; 3; 5	9; 1; 9; 2; 2; 3; 3; 3	6639; 6644; 6645; 6658; 6659; 7131; 7132; 7135
173	CCDC22	-1.04841	-1.12881	0.000568508	0.00267797	-0.957753	-1.71909	1468	4	CCDC22_2; CCDC22_3; CCDC22_4; CCDC22_1	4	28952	O60826	72	28952	54520	Q567U6	CCDC22	CCDC93	1.45186e-12	8.32019e-07	0.999999	11	8	CCC-Wash (WASH1, FAM21C) complex; CCDC22-COMMD1-CUL2 complex; CCC complex; CCDC22-COMMD8-CUL1 complex; Ubiquitin E3 ligase (CCDC22, COMMD8, CUL3); COMMD1-CCDC22-CCDC93-C16orf62 complex; CCDC22-CCDC93-C16orf62 complex; CCDC22-CCDC93-C16orf62-FAM21-WASH1 complex	15; 3; 13; 3; 3; 4; 3; 5	9; 1; 9; 2; 2; 3; 3; 3	6639; 6644; 6645; 6658; 6659; 7131; 7132; 7135
174	CCDC22	-1.04841	-1.12881	0.000568508	0.00267797	-0.957753	-1.71909	1468	4	CCDC22_2; CCDC22_3; CCDC22_4; CCDC22_1	4	28952	O60826	72	28952	57448	Q9NR09	CCDC22	BIRC6	5.87755e-14	0.0509295	0.949071	11	8	CCC-Wash (WASH1, FAM21C) complex; CCDC22-COMMD1-CUL2 complex; CCC complex; CCDC22-COMMD8-CUL1 complex; Ubiquitin E3 ligase (CCDC22, COMMD8, CUL3); COMMD1-CCDC22-CCDC93-C16orf62 complex; CCDC22-CCDC93-C16orf62 complex; CCDC22-CCDC93-C16orf62-FAM21-WASH1 complex	15; 3; 13; 3; 3; 4; 3; 5	9; 1; 9; 2; 2; 3; 3; 3	6639; 6644; 6645; 6658; 6659; 7131; 7132; 7135
175	CCDC22	-1.04841	-1.12881	0.000568508	0.00267797	-0.957753	-1.71909	1468	4	CCDC22_2; CCDC22_3; CCDC22_4; CCDC22_1	4	28952	O60826	72	28952	54939	Q9H0A8	CCDC22	COMMD4	1.29095e-24	7.30804e-10	1	11	8	CCC-Wash (WASH1, FAM21C) complex; CCDC22-COMMD1-CUL2 complex; CCC complex; CCDC22-COMMD8-CUL1 complex; Ubiquitin E3 ligase (CCDC22, COMMD8, CUL3); COMMD1-CCDC22-CCDC93-C16orf62 complex; CCDC22-CCDC93-C16orf62 complex; CCDC22-CCDC93-C16orf62-FAM21-WASH1 complex	15; 3; 13; 3; 3; 4; 3; 5	9; 1; 9; 2; 2; 3; 3; 3	6639; 6644; 6645; 6658; 6659; 7131; 7132; 7135
176	CCDC22	-1.04841	-1.12881	0.000568508	0.00267797	-0.957753	-1.71909	1468	4	CCDC22_2; CCDC22_3; CCDC22_4; CCDC22_1	4	28952	O60826	72	28952	28991	Q9GZQ3	CCDC22	COMMD5	2.00726e-26	1.44325e-12	1	11	8	CCC-Wash (WASH1, FAM21C) complex; CCDC22-COMMD1-CUL2 complex; CCC complex; CCDC22-COMMD8-CUL1 complex; Ubiquitin E3 ligase (CCDC22, COMMD8, CUL3); COMMD1-CCDC22-CCDC93-C16orf62 complex; CCDC22-CCDC93-C16orf62 complex; CCDC22-CCDC93-C16orf62-FAM21-WASH1 complex	15; 3; 13; 3; 3; 4; 3; 5	9; 1; 9; 2; 2; 3; 3; 3	6639; 6644; 6645; 6658; 6659; 7131; 7132; 7135
177	CCDC22	-1.04841	-1.12881	0.000568508	0.00267797	-0.957753	-1.71909	1468	4	CCDC22_2; CCDC22_3; CCDC22_4; CCDC22_1	4	28952	O60826	72	28952	23412	Q9UBI1	CCDC22	COMMD3	1.4349e-19	4.0857e-11	1	11	8	CCC-Wash (WASH1, FAM21C) complex; CCDC22-COMMD1-CUL2 complex; CCC complex; CCDC22-COMMD8-CUL1 complex; Ubiquitin E3 ligase (CCDC22, COMMD8, CUL3); COMMD1-CCDC22-CCDC93-C16orf62 complex; CCDC22-CCDC93-C16orf62 complex; CCDC22-CCDC93-C16orf62-FAM21-WASH1 complex	15; 3; 13; 3; 3; 4; 3; 5	9; 1; 9; 2; 2; 3; 3; 3	6639; 6644; 6645; 6658; 6659; 7131; 7132; 7135
178	CCDC22	-1.04841	-1.12881	0.000568508	0.00267797	-0.957753	-1.71909	1468	4	CCDC22_2; CCDC22_3; CCDC22_4; CCDC22_1	4	28952	O60826	72	28952	51122	Q86X83	CCDC22	COMMD2	2.34484e-22	4.88094e-16	1	11	8	CCC-Wash (WASH1, FAM21C) complex; CCDC22-COMMD1-CUL2 complex; CCC complex; CCDC22-COMMD8-CUL1 complex; Ubiquitin E3 ligase (CCDC22, COMMD8, CUL3); COMMD1-CCDC22-CCDC93-C16orf62 complex; CCDC22-CCDC93-C16orf62 complex; CCDC22-CCDC93-C16orf62-FAM21-WASH1 complex	15; 3; 13; 3; 3; 4; 3; 5	9; 1; 9; 2; 2; 3; 3; 3	6639; 6644; 6645; 6658; 6659; 7131; 7132; 7135
179	CCDC22	-1.04841	-1.12881	0.000568508	0.00267797	-0.957753	-1.71909	1468	4	CCDC22_2; CCDC22_3; CCDC22_4; CCDC22_1	4	28952	O60826	72	28952	51699	Q9UBQ0	CCDC22	VPS29	3.78073e-27	1.40275e-06	0.999999	11	8	CCC-Wash (WASH1, FAM21C) complex; CCDC22-COMMD1-CUL2 complex; CCC complex; CCDC22-COMMD8-CUL1 complex; Ubiquitin E3 ligase (CCDC22, COMMD8, CUL3); COMMD1-CCDC22-CCDC93-C16orf62 complex; CCDC22-CCDC93-C16orf62 complex; CCDC22-CCDC93-C16orf62-FAM21-WASH1 complex	15; 3; 13; 3; 3; 4; 3; 5	9; 1; 9; 2; 2; 3; 3; 3	6639; 6644; 6645; 6658; 6659; 7131; 7132; 7135
180	CCDC22	-1.04841	-1.12881	0.000568508	0.00267797	-0.957753	-1.71909	1468	4	CCDC22_2; CCDC22_3; CCDC22_4; CCDC22_1	4	28952	O60826	72	28952	51397	Q9Y6G5	CCDC22	COMMD10	1.49338e-20	1.99293e-16	1	11	8	CCC-Wash (WASH1, FAM21C) complex; CCDC22-COMMD1-CUL2 complex; CCC complex; CCDC22-COMMD8-CUL1 complex; Ubiquitin E3 ligase (CCDC22, COMMD8, CUL3); COMMD1-CCDC22-CCDC93-C16orf62 complex; CCDC22-CCDC93-C16orf62 complex; CCDC22-CCDC93-C16orf62-FAM21-WASH1 complex	15; 3; 13; 3; 3; 4; 3; 5	9; 1; 9; 2; 2; 3; 3; 3	6639; 6644; 6645; 6658; 6659; 7131; 7132; 7135
181	CCDC22	-1.04841	-1.12881	0.000568508	0.00267797	-0.957753	-1.71909	1468	4	CCDC22_2; CCDC22_3; CCDC22_4; CCDC22_1	4	28952	O60826	72	28952	54951	Q9NX08	CCDC22	COMMD8	4.95427e-22	4.72028e-16	1	11	8	CCC-Wash (WASH1, FAM21C) complex; CCDC22-COMMD1-CUL2 complex; CCC complex; CCDC22-COMMD8-CUL1 complex; Ubiquitin E3 ligase (CCDC22, COMMD8, CUL3); COMMD1-CCDC22-CCDC93-C16orf62 complex; CCDC22-CCDC93-C16orf62 complex; CCDC22-CCDC93-C16orf62-FAM21-WASH1 complex	15; 3; 13; 3; 3; 4; 3; 5	9; 1; 9; 2; 2; 3; 3; 3	6639; 6644; 6645; 6658; 6659; 7131; 7132; 7135
182	CCDC22	-1.04841	-1.12881	0.000568508	0.00267797	-0.957753	-1.71909	1468	4	CCDC22_2; CCDC22_3; CCDC22_4; CCDC22_1	4	28952	O60826	72	28952	57511	Q9Y2V7	CCDC22	COG6	6.95452e-14	0.0164399	0.98356	11	8	CCC-Wash (WASH1, FAM21C) complex; CCDC22-COMMD1-CUL2 complex; CCC complex; CCDC22-COMMD8-CUL1 complex; Ubiquitin E3 ligase (CCDC22, COMMD8, CUL3); COMMD1-CCDC22-CCDC93-C16orf62 complex; CCDC22-CCDC93-C16orf62 complex; CCDC22-CCDC93-C16orf62-FAM21-WASH1 complex	15; 3; 13; 3; 3; 4; 3; 5	9; 1; 9; 2; 2; 3; 3; 3	6639; 6644; 6645; 6658; 6659; 7131; 7132; 7135
183	HDAC3	-1.04384	-1.04384	0.000535534	0.00259083	-0.99435	-1.50263	1348	2	HDAC3_2; HDAC3_3	4	8841	O15379	74	8841	92906	Q8WVV9	HDAC3	HNRNPLL	7.6292e-05	0.0488801	0.951044	2	14	NCOR complex; SMRT complex; NCOR-HDAC3 complex; SMRT core complex; NCOR1 complex; NCOR2 complex; Kaiso-NCOR complex; ANCO1-HDAC3 complex; Emerin regulatory complex; Emerin complex 32; AJUBA-GFI1-HDAC3 complex; AKT1-APPL1-HDAC3 complex, induced by IGF-1; HDAC3-H1.3-SMRT-N-Cor complex; DTNBP1(1A)-HDAC3 complex	6; 5; 5; 3; 10; 7; 10; 2; 9; 22; 3; 3; 4; 2	2; 2; 2; 1; 4; 2; 3; 1; 1; 6; 1; 1; 1; 1	15; 58; 741; 752; 1413; 1505; 2183; 5426; 5609; 5614; 6244; 7406; 7480; 7487
184	HDAC3	-1.04384	-1.04384	0.000535534	0.00259083	-0.99435	-1.50263	1348	2	HDAC3_2; HDAC3_3	4	8841	O15379	74	8841	79726	Q6PJI9	HDAC3	WDR59	2.65619e-09	5.37233e-05	0.999946	2	14	NCOR complex; SMRT complex; NCOR-HDAC3 complex; SMRT core complex; NCOR1 complex; NCOR2 complex; Kaiso-NCOR complex; ANCO1-HDAC3 complex; Emerin regulatory complex; Emerin complex 32; AJUBA-GFI1-HDAC3 complex; AKT1-APPL1-HDAC3 complex, induced by IGF-1; HDAC3-H1.3-SMRT-N-Cor complex; DTNBP1(1A)-HDAC3 complex	6; 5; 5; 3; 10; 7; 10; 2; 9; 22; 3; 3; 4; 2	2; 2; 2; 1; 4; 2; 3; 1; 1; 6; 1; 1; 1; 1	15; 58; 741; 752; 1413; 1505; 2183; 5426; 5609; 5614; 6244; 7406; 7480; 7487
185	NSD1	-1.03259	-0.967837	7.61396e-05	0.000761069	-0.990219	-1.65085	193	3	NSD1_3; NSD1_4; NSD1_2	3	64324	Q96L73	76	64324	3609	Q12906	NSD1	ILF3	0.000237872	0.00259989	0.997162	1
186	TAF5	-1.0313	-1.0313	0.000963881	0.00367095	-0.99215	-1.4993	2427	2	TAF5_3; TAF5_2	4	6877	Q15542	78	6877	83860	Q5VWG9	TAF5	TAF3	6.93417e-13	0.000170874	0.999829	1	10	TFTC complex (TATA-binding protein-free TAF-II-containing complex); TFIID-beta complex; TFTC complex (TATA-binding protein-free TAF-II-containing complex); TFIID complex; TFIID complex, B-cell specific; DA complex; DAB complex; TFIID complex; TFTC complex (TATA-binding protein-free TAF-II-containing complex); TFIID-beta complex	50; 24; 50; 23; 12; 15; 16; 23; 50; 24	9; 6; 9; 6; 3; 4; 4; 6; 9; 6	445; 469; 470; 484; 485; 492; 493; 509; 513; 514
187	PAGR1	-1.02765	-1.18716	0.000372064	0.00208123	-0.982355	-1.63774	947	3	PAGR1_4; PAGR1_3; PAGR1_2	4	79447	Q9BTK6	80	79447	22976	Q6ZW49	PAGR1	PAXIP1	6.09863e-11	1.16992e-08	1	2	3	PTIP-HMT complex; MLL3 complex; MLL4 complex	10; 9; 9	6; 6; 5	5195; 6461; 6467
188	PAGR1	-1.02765	-1.18716	0.000372064	0.00208123	-0.982355	-1.63774	947	3	PAGR1_4; PAGR1_3; PAGR1_2	4	79447	Q9BTK6	80	79447	7404	O14607	PAGR1	UTY	0.0703029	6.04358e-08	0.929697	2	3	PTIP-HMT complex; MLL3 complex; MLL4 complex	10; 9; 9	6; 6; 5	5195; 6461; 6467
189	LAMTOR4	-1.01281	-1.26842	0.00289488	0.00737602	-0.959542	-1.59971	7375	3	LAMTOR4_1; LAMTOR4_2; LAMTOR4_4	4	389541	Q0VGL1	84	389541	28956	Q9Y2Q5	LAMTOR4	LAMTOR2	1.28729e-21	3.95479e-06	0.999996	14	1	v-ATPase-Ragulator-AXIN/LKB1-AMPK complex	14	7	6888
190	LAMTOR4	-1.01281	-1.26842	0.00289488	0.00737602	-0.959542	-1.59971	7375	3	LAMTOR4_1; LAMTOR4_2; LAMTOR4_4	4	389541	Q0VGL1	84	389541	57521	Q8N122	LAMTOR4	RPTOR	1.16978e-09	0.0438799	0.95612	14	1	v-ATPase-Ragulator-AXIN/LKB1-AMPK complex	14	7	6888
191	LAMTOR4	-1.01281	-1.26842	0.00289488	0.00737602	-0.959542	-1.59971	7375	3	LAMTOR4_1; LAMTOR4_2; LAMTOR4_4	4	389541	Q0VGL1	84	389541	55004	Q6IAA8	LAMTOR4	LAMTOR1	6.21619e-27	0.000147205	0.999853	14	1	v-ATPase-Ragulator-AXIN/LKB1-AMPK complex	14	7	6888
192	LAMTOR4	-1.01281	-1.26842	0.00289488	0.00737602	-0.959542	-1.59971	7375	3	LAMTOR4_1; LAMTOR4_2; LAMTOR4_4	4	389541	Q0VGL1	84	389541	282991	Q6QNY1	LAMTOR4	BLOC1S2	0.0387273	0.0220954	0.939177	14	1	v-ATPase-Ragulator-AXIN/LKB1-AMPK complex	14	7	6888
193	LAMTOR4	-1.01281	-1.26842	0.00289488	0.00737602	-0.959542	-1.59971	7375	3	LAMTOR4_1; LAMTOR4_2; LAMTOR4_4	4	389541	Q0VGL1	84	389541	2647	P78537	LAMTOR4	BLOC1S1	9.03276e-10	0.00450281	0.995497	14	1	v-ATPase-Ragulator-AXIN/LKB1-AMPK complex	14	7	6888
194	LAMTOR4	-1.01281	-1.26842	0.00289488	0.00737602	-0.959542	-1.59971	7375	3	LAMTOR4_1; LAMTOR4_2; LAMTOR4_4	4	389541	Q0VGL1	84	389541	8649	Q9UHA4	LAMTOR4	LAMTOR3	7.82741e-20	0.000814855	0.999185	14	1	v-ATPase-Ragulator-AXIN/LKB1-AMPK complex	14	7	6888
195	LAMTOR4	-1.01281	-1.26842	0.00289488	0.00737602	-0.959542	-1.59971	7375	3	LAMTOR4_1; LAMTOR4_2; LAMTOR4_4	4	389541	Q0VGL1	84	389541	118426	Q969J3	LAMTOR4	LOH12CR1	1.10469e-12	0.00035342	0.999647	14	1	v-ATPase-Ragulator-AXIN/LKB1-AMPK complex	14	7	6888
196	LAMTOR4	-1.01281	-1.26842	0.00289488	0.00737602	-0.959542	-1.59971	7375	3	LAMTOR4_1; LAMTOR4_2; LAMTOR4_4	4	389541	Q0VGL1	84	389541	10542	O43504	LAMTOR4	LAMTOR5	2.00347e-22	6.28047e-06	0.999994	14	1	v-ATPase-Ragulator-AXIN/LKB1-AMPK complex	14	7	6888
197	LAMTOR4	-1.01281	-1.26842	0.00289488	0.00737602	-0.959542	-1.59971	7375	3	LAMTOR4_1; LAMTOR4_2; LAMTOR4_4	4	389541	Q0VGL1	84	389541	119032	Q96B45	LAMTOR4	C10orf32	2.9298e-21	0.00078795	0.999212	14	1	v-ATPase-Ragulator-AXIN/LKB1-AMPK complex	14	7	6888
198	LAMTOR4	-1.01281	-1.26842	0.00289488	0.00737602	-0.959542	-1.59971	7375	3	LAMTOR4_1; LAMTOR4_2; LAMTOR4_4	4	389541	Q0VGL1	84	389541	79036	Q9BQD3	LAMTOR4	KXD1	8.20551e-11	0.0173929	0.982607	14	1	v-ATPase-Ragulator-AXIN/LKB1-AMPK complex	14	7	6888
199	LAMTOR4	-1.01281	-1.26842	0.00289488	0.00737602	-0.959542	-1.59971	7375	3	LAMTOR4_1; LAMTOR4_2; LAMTOR4_4	4	389541	Q0VGL1	84	389541	54785	Q96GS4	LAMTOR4	C17orf59	1.8463e-19	1.91051e-07	1	14	1	v-ATPase-Ragulator-AXIN/LKB1-AMPK complex	14	7	6888
200	LAMTOR4	-1.01281	-1.26842	0.00289488	0.00737602	-0.959542	-1.59971	7375	3	LAMTOR4_1; LAMTOR4_2; LAMTOR4_4	4	389541	Q0VGL1	84	389541	23557	O95295	LAMTOR4	SNAPIN	5.1468e-12	0.0181262	0.981874	14	1	v-ATPase-Ragulator-AXIN/LKB1-AMPK complex	14	7	6888
201	LAMTOR4	-1.01281	-1.26842	0.00289488	0.00737602	-0.959542	-1.59971	7375	3	LAMTOR4_1; LAMTOR4_2; LAMTOR4_4	4	389541	Q0VGL1	84	389541	201163	Q8NFG4	LAMTOR4	FLCN	0.000765315	0.00978262	0.989452	14	1	v-ATPase-Ragulator-AXIN/LKB1-AMPK complex	14	7	6888
202	LAMTOR4	-1.01281	-1.26842	0.00289488	0.00737602	-0.959542	-1.59971	7375	3	LAMTOR4_1; LAMTOR4_2; LAMTOR4_4	4	389541	Q0VGL1	84	389541	10670	Q7L523	LAMTOR4	RRAGA	3.16113e-10	7.59958e-09	1	14	1	v-ATPase-Ragulator-AXIN/LKB1-AMPK complex	14	7	6888
203	SMARCA5	-1.00373	-1.07887	0.000232589	0.00156936	-0.96779	-1.73711	600	4	SMARCA5_2; SMARCA5_3; SMARCA5_4; SMARCA5_1	4	8467	O60264	87	8467	6223	P39019	SMARCA5	RPS19	3.09435e-16	0.17867	0.82133	4	12	DNMT3B complex; Polycomb repressive complex 1 (PRC1, hPRC-H); HuCHRAC complex; WICH complex; SNF2h-cohesin-NuRD complex; Remodeling and spacing factor (RSF) complex; SNF2H-BAZ1A complex; CEN complex; ALL-1 supercomplex; Nucleolar remodeling complex (NoRC complex); B-WICH complex; B-WICH complex	7; 13; 4; 2; 16; 2; 2; 37; 28; 2; 17; 17	2; 2; 1; 1; 2; 1; 1; 2; 6; 1; 2; 2	49; 116; 234; 236; 282; 921; 925; 929; 1257; 5694; 6194; 6302
204	SMARCA5	-1.00373	-1.07887	0.000232589	0.00156936	-0.96779	-1.73711	600	4	SMARCA5_2; SMARCA5_3; SMARCA5_4; SMARCA5_1	4	8467	O60264	87	8467	84294	Q9BRU9	SMARCA5	UTP23	1.1392e-13	0.187083	0.812917	4	12	DNMT3B complex; Polycomb repressive complex 1 (PRC1, hPRC-H); HuCHRAC complex; WICH complex; SNF2h-cohesin-NuRD complex; Remodeling and spacing factor (RSF) complex; SNF2H-BAZ1A complex; CEN complex; ALL-1 supercomplex; Nucleolar remodeling complex (NoRC complex); B-WICH complex; B-WICH complex	7; 13; 4; 2; 16; 2; 2; 37; 28; 2; 17; 17	2; 2; 1; 1; 2; 1; 1; 2; 6; 1; 2; 2	49; 116; 234; 236; 282; 921; 925; 929; 1257; 5694; 6194; 6302
205	SMARCA5	-1.00373	-1.07887	0.000232589	0.00156936	-0.96779	-1.73711	600	4	SMARCA5_2; SMARCA5_3; SMARCA5_4; SMARCA5_1	4	8467	O60264	87	8467	11103	Q13601	SMARCA5	KRR1	1.41112e-15	0.161015	0.838985	4	12	DNMT3B complex; Polycomb repressive complex 1 (PRC1, hPRC-H); HuCHRAC complex; WICH complex; SNF2h-cohesin-NuRD complex; Remodeling and spacing factor (RSF) complex; SNF2H-BAZ1A complex; CEN complex; ALL-1 supercomplex; Nucleolar remodeling complex (NoRC complex); B-WICH complex; B-WICH complex	7; 13; 4; 2; 16; 2; 2; 37; 28; 2; 17; 17	2; 2; 1; 1; 2; 1; 1; 2; 6; 1; 2; 2	49; 116; 234; 236; 282; 921; 925; 929; 1257; 5694; 6194; 6302
206	SMARCA5	-1.00373	-1.07887	0.000232589	0.00156936	-0.96779	-1.73711	600	4	SMARCA5_2; SMARCA5_3; SMARCA5_4; SMARCA5_1	4	8467	O60264	87	8467	5928	Q09028	SMARCA5	RBBP4	7.34022e-15	0.00380399	0.996196	4	12	DNMT3B complex; Polycomb repressive complex 1 (PRC1, hPRC-H); HuCHRAC complex; WICH complex; SNF2h-cohesin-NuRD complex; Remodeling and spacing factor (RSF) complex; SNF2H-BAZ1A complex; CEN complex; ALL-1 supercomplex; Nucleolar remodeling complex (NoRC complex); B-WICH complex; B-WICH complex	7; 13; 4; 2; 16; 2; 2; 37; 28; 2; 17; 17	2; 2; 1; 1; 2; 1; 1; 2; 6; 1; 2; 2	49; 116; 234; 236; 282; 921; 925; 929; 1257; 5694; 6194; 6302
207	FLCN	-1.00027	-1.05646	0.000283365	0.00177973	-0.984072	-1.6406	721	3	FLCN_3; FLCN_4; FLCN_1	4	201163	Q8NFG4	89	201163	389541	Q0VGL1	FLCN	LAMTOR4	0.000765315	0.00978262	0.989452	4	1	FLCN-FNIP2 complex	2	1	7430
208	FLCN	-1.00027	-1.05646	0.000283365	0.00177973	-0.984072	-1.6406	721	3	FLCN_3; FLCN_4; FLCN_1	4	201163	Q8NFG4	89	201163	51728	Q9Y2Y1	FLCN	POLR3K	3.27973e-09	5.31173e-05	0.999947	4	1	FLCN-FNIP2 complex	2	1	7430
209	FLCN	-1.00027	-1.05646	0.000283365	0.00177973	-0.984072	-1.6406	721	3	FLCN_3; FLCN_4; FLCN_1	4	201163	Q8NFG4	89	201163	55004	Q6IAA8	FLCN	LAMTOR1	0.000402505	0.00248989	0.997108	4	1	FLCN-FNIP2 complex	2	1	7430
210	FLCN	-1.00027	-1.05646	0.000283365	0.00177973	-0.984072	-1.6406	721	3	FLCN_3; FLCN_4; FLCN_1	4	201163	Q8NFG4	89	201163	23001	Q8IZQ1	FLCN	WDFY3	5.34877e-11	3.33413e-06	0.999997	4	1	FLCN-FNIP2 complex	2	1	7430
211	CTCF	-0.988518	-0.988518	0.000664554	0.00297107	-0.993598	-1.50149	1673	2	CTCF_3; CTCF_4	4	10664	P49711	90	10664	6223	P39019	CTCF	RPS19	1.32069e-10	0.00382406	0.996176	7	3	SMAD3-SMAD4-CTCF protein-DNA complex; CTFC-TAF1 complex; CTCF-nucleophosmin complex	3; 2; 2	1; 1; 1	2705; 5153; 5154
212	CTCF	-0.988518	-0.988518	0.000664554	0.00297107	-0.993598	-1.50149	1673	2	CTCF_3; CTCF_4	4	10664	P49711	90	10664	9045	P50914	CTCF	RPL14	1.80561e-10	0.0024899	0.99751	7	3	SMAD3-SMAD4-CTCF protein-DNA complex; CTFC-TAF1 complex; CTCF-nucleophosmin complex	3; 2; 2	1; 1; 1	2705; 5153; 5154
213	CTCF	-0.988518	-0.988518	0.000664554	0.00297107	-0.993598	-1.50149	1673	2	CTCF_3; CTCF_4	4	10664	P49711	90	10664	6426	Q07955	CTCF	SRSF1	2.22068e-08	0.00105455	0.998945	7	3	SMAD3-SMAD4-CTCF protein-DNA complex; CTFC-TAF1 complex; CTCF-nucleophosmin complex	3; 2; 2	1; 1; 1	2705; 5153; 5154
214	CTCF	-0.988518	-0.988518	0.000664554	0.00297107	-0.993598	-1.50149	1673	2	CTCF_3; CTCF_4	4	10664	P49711	90	10664	84294	Q9BRU9	CTCF	UTP23	6.68408e-08	0.038173	0.961827	7	3	SMAD3-SMAD4-CTCF protein-DNA complex; CTFC-TAF1 complex; CTCF-nucleophosmin complex	3; 2; 2	1; 1; 1	2705; 5153; 5154
215	CTCF	-0.988518	-0.988518	0.000664554	0.00297107	-0.993598	-1.50149	1673	2	CTCF_3; CTCF_4	4	10664	P49711	90	10664	3921	P08865	CTCF	RPSA	5.72909e-07	0.0217366	0.978263	7	3	SMAD3-SMAD4-CTCF protein-DNA complex; CTFC-TAF1 complex; CTCF-nucleophosmin complex	3; 2; 2	1; 1; 1	2705; 5153; 5154
216	CTCF	-0.988518	-0.988518	0.000664554	0.00297107	-0.993598	-1.50149	1673	2	CTCF_3; CTCF_4	4	10664	P49711	90	10664	11103	Q13601	CTCF	KRR1	3.66519e-09	0.00634311	0.993657	7	3	SMAD3-SMAD4-CTCF protein-DNA complex; CTFC-TAF1 complex; CTCF-nucleophosmin complex	3; 2; 2	1; 1; 1	2705; 5153; 5154
217	CTCF	-0.988518	-0.988518	0.000664554	0.00297107	-0.993598	-1.50149	1673	2	CTCF_3; CTCF_4	4	10664	P49711	90	10664	23144	Q8IXZ2	CTCF	ZC3H3	1.5327e-08	0.0326827	0.967317	7	3	SMAD3-SMAD4-CTCF protein-DNA complex; CTFC-TAF1 complex; CTCF-nucleophosmin complex	3; 2; 2	1; 1; 1	2705; 5153; 5154
218	SMARCD2	-0.987656	-0.987656	0.00162327	0.00502427	-0.989467	-1.49525	4088	2	SMARCD2_3; SMARCD2_2	4	6603	Q92925	91	6603	11060	O00308	SMARCD2	WWP2	1.09888e-10	0.0163295	0.983671	4	7	SWI-SNF chromatin remodeling-related-BRCA1 complex; BRG1-SIN3A complex; BRM-SIN3A complex; LARC complex (LCR-associated remodeling complex); BRM-SIN3A-HDAC complex; EBAFb complex; EBAFa complex	10; 14; 15; 19; 12; 10; 10	4; 6; 6; 5; 5; 4; 5	238; 713; 714; 778; 806; 1239; 1252
219	SMARCD2	-0.987656	-0.987656	0.00162327	0.00502427	-0.989467	-1.49525	4088	2	SMARCD2_3; SMARCD2_2	4	6603	Q92925	91	6603	6598	Q12824	SMARCD2	SMARCB1	2.9535e-14	3.38249e-05	0.999966	4	7	SWI-SNF chromatin remodeling-related-BRCA1 complex; BRG1-SIN3A complex; BRM-SIN3A complex; LARC complex (LCR-associated remodeling complex); BRM-SIN3A-HDAC complex; EBAFb complex; EBAFa complex	10; 14; 15; 19; 12; 10; 10	4; 6; 6; 5; 5; 4; 5	238; 713; 714; 778; 806; 1239; 1252
220	SMARCD2	-0.987656	-0.987656	0.00162327	0.00502427	-0.989467	-1.49525	4088	2	SMARCD2_3; SMARCD2_2	4	6603	Q92925	91	6603	6601	Q8TAQ2	SMARCD2	SMARCC2	7.66726e-15	1.97505e-05	0.99998	4	7	SWI-SNF chromatin remodeling-related-BRCA1 complex; BRG1-SIN3A complex; BRM-SIN3A complex; LARC complex (LCR-associated remodeling complex); BRM-SIN3A-HDAC complex; EBAFb complex; EBAFa complex	10; 14; 15; 19; 12; 10; 10	4; 6; 6; 5; 5; 4; 5	238; 713; 714; 778; 806; 1239; 1252
221	SMARCD2	-0.987656	-0.987656	0.00162327	0.00502427	-0.989467	-1.49525	4088	2	SMARCD2_3; SMARCD2_2	4	6603	Q92925	91	6603	27297	O75575	SMARCD2	CRCP	4.93454e-14	0.233012	0.766988	4	7	SWI-SNF chromatin remodeling-related-BRCA1 complex; BRG1-SIN3A complex; BRM-SIN3A complex; LARC complex (LCR-associated remodeling complex); BRM-SIN3A-HDAC complex; EBAFb complex; EBAFa complex	10; 14; 15; 19; 12; 10; 10	4; 6; 6; 5; 5; 4; 5	238; 713; 714; 778; 806; 1239; 1252
222	BRK1	-0.987276	-0.979973	1.93502e-06	5.54189e-05	-0.990077	-1.77711	4	4	BRK1_3; BRK1_4; BRK1_1; BRK1_2	4	55845	Q8WUW1	92	55845	3071	P55160	BRK1	NCKAP1L	9.21895e-11	9.00328e-09	1	12	1	Wave-2 complex	5	3	186
223	BRK1	-0.987276	-0.979973	1.93502e-06	5.54189e-05	-0.990077	-1.77711	4	4	BRK1_3; BRK1_4; BRK1_1; BRK1_2	4	55845	Q8WUW1	92	55845	23191	Q7L576	BRK1	CYFIP1	1.20001e-10	3.81558e-06	0.999996	12	1	Wave-2 complex	5	3	186
224	BRK1	-0.987276	-0.979973	1.93502e-06	5.54189e-05	-0.990077	-1.77711	4	4	BRK1_3; BRK1_4; BRK1_1; BRK1_2	4	55845	Q8WUW1	92	55845	57511	Q9Y2V7	BRK1	COG6	8.63557e-12	0.000953136	0.999047	12	1	Wave-2 complex	5	3	186
225	BRK1	-0.987276	-0.979973	1.93502e-06	5.54189e-05	-0.990077	-1.77711	4	4	BRK1_3; BRK1_4; BRK1_1; BRK1_2	4	55845	Q8WUW1	92	55845	10318	Q15025	BRK1	TNIP1	1.02421e-10	0.000350746	0.999649	12	1	Wave-2 complex	5	3	186
226	BRK1	-0.987276	-0.979973	1.93502e-06	5.54189e-05	-0.990077	-1.77711	4	4	BRK1_3; BRK1_4; BRK1_1; BRK1_2	4	55845	Q8WUW1	92	55845	10163	Q9Y6W5	BRK1	WASF2	2.51306e-09	3.12985e-07	1	12	1	Wave-2 complex	5	3	186
227	BRK1	-0.987276	-0.979973	1.93502e-06	5.54189e-05	-0.990077	-1.77711	4	4	BRK1_3; BRK1_4; BRK1_1; BRK1_2	4	55845	Q8WUW1	92	55845	2647	P78537	BRK1	BLOC1S1	6.80507e-05	0.00994252	0.989989	12	1	Wave-2 complex	5	3	186
228	BRK1	-0.987276	-0.979973	1.93502e-06	5.54189e-05	-0.990077	-1.77711	4	4	BRK1_3; BRK1_4; BRK1_1; BRK1_2	4	55845	Q8WUW1	92	55845	118426	Q969J3	BRK1	LOH12CR1	3.1343e-09	0.00695028	0.99305	12	1	Wave-2 complex	5	3	186
229	BRK1	-0.987276	-0.979973	1.93502e-06	5.54189e-05	-0.990077	-1.77711	4	4	BRK1_3; BRK1_4; BRK1_1; BRK1_2	4	55845	Q8WUW1	92	55845	10056	Q9NSD9	BRK1	FARSB	9.32813e-13	0.00375902	0.996241	12	1	Wave-2 complex	5	3	186
230	BRK1	-0.987276	-0.979973	1.93502e-06	5.54189e-05	-0.990077	-1.77711	4	4	BRK1_3; BRK1_4; BRK1_1; BRK1_2	4	55845	Q8WUW1	92	55845	282991	Q6QNY1	BRK1	BLOC1S2	2.57823e-07	0.0289209	0.971079	12	1	Wave-2 complex	5	3	186
231	BRK1	-0.987276	-0.979973	1.93502e-06	5.54189e-05	-0.990077	-1.77711	4	4	BRK1_3; BRK1_4; BRK1_1; BRK1_2	4	55845	Q8WUW1	92	55845	119032	Q96B45	BRK1	C10orf32	3.09548e-06	0.0329859	0.967011	12	1	Wave-2 complex	5	3	186
232	BRK1	-0.987276	-0.979973	1.93502e-06	5.54189e-05	-0.990077	-1.77711	4	4	BRK1_3; BRK1_4; BRK1_1; BRK1_2	4	55845	Q8WUW1	92	55845	23557	O95295	BRK1	SNAPIN	6.54263e-10	0.127171	0.872829	12	1	Wave-2 complex	5	3	186
233	BRK1	-0.987276	-0.979973	1.93502e-06	5.54189e-05	-0.990077	-1.77711	4	4	BRK1_3; BRK1_4; BRK1_1; BRK1_2	4	55845	Q8WUW1	92	55845	51019	Q9Y3C0	BRK1	CCDC53	5.84185e-05	0.000229046	0.999713	12	1	Wave-2 complex	5	3	186
234	PPP2R2A	-0.971774	-1.03152	0.00151473	0.00487798	-0.942904	-1.69244	3913	4	PPP2R2A_2; PPP2R2A_3; PPP2R2A_4; PPP2R2A_1	4	5520	P63151	95	5520	29844	P0C1Z6	PPP2R2A	TFPT	1.67203e-15	0.193565	0.806435	2	2	RAF1-PPP2-PIN1 complex; PP2A-NR3A complex	5; 4	2; 2	5211; 7005
235	PPP2R2A	-0.971774	-1.03152	0.00151473	0.00487798	-0.942904	-1.69244	3913	4	PPP2R2A_2; PPP2R2A_3; PPP2R2A_4; PPP2R2A_1	4	5520	P63151	95	5520	5518	P30153	PPP2R2A	PPP2R1A	1.2573e-10	0.0313602	0.96864	2	2	RAF1-PPP2-PIN1 complex; PP2A-NR3A complex	5; 4	2; 2	5211; 7005
236	FARSA	-0.968999	-0.968999	0.00168917	0.00510482	-0.989197	-1.49484	4254	2	FARSA_4; FARSA_1	4	2193	Q9Y285	97	2193	10056	Q9NSD9	FARSA	FARSB	8.21827e-13	2.39331e-06	0.999998	1
237	PSMB7	-0.967332	-0.999137	3.09603e-06	7.75201e-05	-0.989353	-1.77581	7	4	PSMB7_3; PSMB7_2; PSMB7_4; PSMB7_1	4	5695	Q99436	99	5695	8624	O95456	PSMB7	PSMG1	3.57577e-09	0.000534352	0.999466	3	5	26S proteasome; 20S proteasome; PA28-20S proteasome; PA700-20S-PA28 complex; PA28gamma-20S proteasome	22; 14; 16; 36; 15	3; 1; 1; 4; 1	181; 191; 192; 193; 194
238	PSMB7	-0.967332	-0.999137	3.09603e-06	7.75201e-05	-0.989353	-1.77581	7	4	PSMB7_3; PSMB7_2; PSMB7_4; PSMB7_1	4	5695	Q99436	99	5695	5717	O00231	PSMB7	PSMD11	9.74266e-17	0.210591	0.789409	3	5	26S proteasome; 20S proteasome; PA28-20S proteasome; PA700-20S-PA28 complex; PA28gamma-20S proteasome	22; 14; 16; 36; 15	3; 1; 1; 4; 1	181; 191; 192; 193; 194
239	PSMB7	-0.967332	-0.999137	3.09603e-06	7.75201e-05	-0.989353	-1.77581	7	4	PSMB7_3; PSMB7_2; PSMB7_4; PSMB7_1	4	5695	Q99436	99	5695	56984	Q969U7	PSMB7	PSMG2	9.35316e-25	0.000446613	0.999553	3	5	26S proteasome; 20S proteasome; PA28-20S proteasome; PA700-20S-PA28 complex; PA28gamma-20S proteasome	22; 14; 16; 36; 15	3; 1; 1; 4; 1	181; 191; 192; 193; 194
240	COMMD8	-0.962355	-0.962355	0.00421678	0.00949439	-0.981986	-1.48394	10621	2	COMMD8_2; COMMD8_1	4	54951	Q9NX08	100	54951	51122	Q86X83	COMMD8	COMMD2	1.76633e-12	3.98157e-07	1	11	4	CCC-Wash (WASH1, FAM21C) complex; CCC complex; CCDC22-COMMD8-CUL1 complex; Ubiquitin E3 ligase (CCDC22, COMMD8, CUL3)	15; 13; 3; 3	9; 9; 2; 2	6639; 6645; 6658; 6659
241	COMMD8	-0.962355	-0.962355	0.00421678	0.00949439	-0.981986	-1.48394	10621	2	COMMD8_2; COMMD8_1	4	54951	Q9NX08	100	54951	57020	Q7Z3J2	COMMD8	C16orf62	5.26137e-11	7.84719e-07	0.999999	11	4	CCC-Wash (WASH1, FAM21C) complex; CCC complex; CCDC22-COMMD8-CUL1 complex; Ubiquitin E3 ligase (CCDC22, COMMD8, CUL3)	15; 13; 3; 3	9; 9; 2; 2	6639; 6645; 6658; 6659
242	COMMD8	-0.962355	-0.962355	0.00421678	0.00949439	-0.981986	-1.48394	10621	2	COMMD8_2; COMMD8_1	4	54951	Q9NX08	100	54951	57511	Q9Y2V7	COMMD8	COG6	3.56503e-10	0.00156549	0.998435	11	4	CCC-Wash (WASH1, FAM21C) complex; CCC complex; CCDC22-COMMD8-CUL1 complex; Ubiquitin E3 ligase (CCDC22, COMMD8, CUL3)	15; 13; 3; 3	9; 9; 2; 2	6639; 6645; 6658; 6659
243	COMMD8	-0.962355	-0.962355	0.00421678	0.00949439	-0.981986	-1.48394	10621	2	COMMD8_2; COMMD8_1	4	54951	Q9NX08	100	54951	54520	Q567U6	COMMD8	CCDC93	1.36647e-13	6.22371e-07	0.999999	11	4	CCC-Wash (WASH1, FAM21C) complex; CCC complex; CCDC22-COMMD8-CUL1 complex; Ubiquitin E3 ligase (CCDC22, COMMD8, CUL3)	15; 13; 3; 3	9; 9; 2; 2	6639; 6645; 6658; 6659
244	COMMD8	-0.962355	-0.962355	0.00421678	0.00949439	-0.981986	-1.48394	10621	2	COMMD8_2; COMMD8_1	4	54951	Q9NX08	100	54951	54939	Q9H0A8	COMMD8	COMMD4	7.03012e-21	2.68749e-13	1	11	4	CCC-Wash (WASH1, FAM21C) complex; CCC complex; CCDC22-COMMD8-CUL1 complex; Ubiquitin E3 ligase (CCDC22, COMMD8, CUL3)	15; 13; 3; 3	9; 9; 2; 2	6639; 6645; 6658; 6659
245	COMMD8	-0.962355	-0.962355	0.00421678	0.00949439	-0.981986	-1.48394	10621	2	COMMD8_2; COMMD8_1	4	54951	Q9NX08	100	54951	28952	O60826	COMMD8	CCDC22	2.57899e-12	4.76291e-07	1	11	4	CCC-Wash (WASH1, FAM21C) complex; CCC complex; CCDC22-COMMD8-CUL1 complex; Ubiquitin E3 ligase (CCDC22, COMMD8, CUL3)	15; 13; 3; 3	9; 9; 2; 2	6639; 6645; 6658; 6659
246	COMMD8	-0.962355	-0.962355	0.00421678	0.00949439	-0.981986	-1.48394	10621	2	COMMD8_2; COMMD8_1	4	54951	Q9NX08	100	54951	28991	Q9GZQ3	COMMD8	COMMD5	7.46722e-19	1.25104e-13	1	11	4	CCC-Wash (WASH1, FAM21C) complex; CCC complex; CCDC22-COMMD8-CUL1 complex; Ubiquitin E3 ligase (CCDC22, COMMD8, CUL3)	15; 13; 3; 3	9; 9; 2; 2	6639; 6645; 6658; 6659
247	COMMD8	-0.962355	-0.962355	0.00421678	0.00949439	-0.981986	-1.48394	10621	2	COMMD8_2; COMMD8_1	4	54951	Q9NX08	100	54951	91949	P83436	COMMD8	COG7	4.10366e-10	0.00218421	0.997816	11	4	CCC-Wash (WASH1, FAM21C) complex; CCC complex; CCDC22-COMMD8-CUL1 complex; Ubiquitin E3 ligase (CCDC22, COMMD8, CUL3)	15; 13; 3; 3	9; 9; 2; 2	6639; 6645; 6658; 6659
248	COMMD8	-0.962355	-0.962355	0.00421678	0.00949439	-0.981986	-1.48394	10621	2	COMMD8_2; COMMD8_1	4	54951	Q9NX08	100	54951	23412	Q9UBI1	COMMD8	COMMD3	9.42782e-20	4.57164e-12	1	11	4	CCC-Wash (WASH1, FAM21C) complex; CCC complex; CCDC22-COMMD8-CUL1 complex; Ubiquitin E3 ligase (CCDC22, COMMD8, CUL3)	15; 13; 3; 3	9; 9; 2; 2	6639; 6645; 6658; 6659
249	COMMD8	-0.962355	-0.962355	0.00421678	0.00949439	-0.981986	-1.48394	10621	2	COMMD8_2; COMMD8_1	4	54951	Q9NX08	100	54951	51699	Q9UBQ0	COMMD8	VPS29	4.29408e-26	0.000281058	0.999719	11	4	CCC-Wash (WASH1, FAM21C) complex; CCC complex; CCDC22-COMMD8-CUL1 complex; Ubiquitin E3 ligase (CCDC22, COMMD8, CUL3)	15; 13; 3; 3	9; 9; 2; 2	6639; 6645; 6658; 6659
250	COMMD8	-0.962355	-0.962355	0.00421678	0.00949439	-0.981986	-1.48394	10621	2	COMMD8_2; COMMD8_1	4	54951	Q9NX08	100	54951	51397	Q9Y6G5	COMMD8	COMMD10	1.04947e-18	5.80431e-13	1	11	4	CCC-Wash (WASH1, FAM21C) complex; CCC complex; CCDC22-COMMD8-CUL1 complex; Ubiquitin E3 ligase (CCDC22, COMMD8, CUL3)	15; 13; 3; 3	9; 9; 2; 2	6639; 6645; 6658; 6659
251	ZFYVE20	-0.947113	-0.947113	0.0116488	0.0186172	-0.967677	-1.46232	29342	2	ZFYVE20_2; ZFYVE20_1	4	64145	Q9H1K0	102	64145	11311	Q9NRW7	ZFYVE20	VPS45	3.25144e-27	1.55172e-14	1	1
252	DDOST	-0.945325	-0.685923	0.000299064	0.00179419	-0.983817	-1.64018	761	3	DDOST_1; DDOST_2; DDOST_4	4	1650	P39656	104	1650	6185	P04844	DDOST	RPN2	5.2864e-13	0.00107467	0.998925	1	3	Oligosaccharyltransferase complex (Stt3A variant); Oligosaccharyltransferase complex (Stt3B variant); SELK multiprotein complex	6; 7; 10	3; 4; 4	1199; 1200; 6131
253	PSMG2	-0.942459	-0.942459	0.00929304	0.016072	-0.971609	-1.46826	23408	2	PSMG2_2; PSMG2_3	4	56984	Q969U7	106	56984	5695	Q99436	PSMG2	PSMB7	9.35316e-25	0.000446613	0.999553	2	1	PAC1-PAC2 complex	2	2	3034
254	PSMG2	-0.942459	-0.942459	0.00929304	0.016072	-0.971609	-1.46826	23408	2	PSMG2_2; PSMG2_3	4	56984	Q969U7	106	56984	8624	O95456	PSMG2	PSMG1	6.54352e-08	4.45316e-08	1	2	1	PAC1-PAC2 complex	2	2	3034
255	TRMT6	-0.939819	-0.810265	0.000229204	0.00156936	-0.985222	-1.64252	583	3	TRMT6_1; TRMT6_3; TRMT6_2	4	51605	Q9UJA5	107	51605	6726	P49458	TRMT6	SRP9	9.20075e-10	0.0195706	0.980429	2
256	TRMT6	-0.939819	-0.810265	0.000229204	0.00156936	-0.985222	-1.64252	583	3	TRMT6_1; TRMT6_3; TRMT6_2	4	51605	Q9UJA5	107	51605	10542	O43504	TRMT6	LAMTOR5	4.27241e-08	0.00618879	0.993811	2
257	TAF10	-0.937854	-0.937854	0.0084165	0.0151033	-0.973185	-1.47064	21200	2	TAF10_4; TAF10_3	4	6881	Q12962	108	6881	83860	Q5VWG9	TAF10	TAF3	0.00460609	0.0100125	0.985381	1	16	GCN5-TRRAP histone acetyltransferase complex; TFTC complex (TATA-binding protein-free TAF-II-containing complex); TFIID-beta complex; TFTC complex (TATA-binding protein-free TAF-II-containing complex); PCAF complex; STAGA complex; TFIID complex; TFIID complex, B-cell specific; DA complex; DAB complex; TFIID complex; TFTC complex (TATA-binding protein-free TAF-II-containing complex); TFIID-beta co…	10; 50; 24; 50; 10; 13; 23; 12; 15; 16; 23; 50; 24; 8; 19; 19	1; 9; 6; 9; 1; 1; 6; 3; 4; 4; 6; 9; 6; 1; 2; 2	438; 445; 469; 470; 471; 476; 484; 485; 492; 493; 509; 513; 514; 6641; 6643; 6664
258	VPS45	-0.933428	-0.933428	0.000950781	0.00364965	-0.992207	-1.49939	2394	2	VPS45_2; VPS45_3	4	11311	Q9NRW7	109	11311	64145	Q9H1K0	VPS45	ZFYVE20	3.25144e-27	1.55172e-14	1	2
259	VPS45	-0.933428	-0.933428	0.000950781	0.00364965	-0.992207	-1.49939	2394	2	VPS45_2; VPS45_3	4	11311	Q9NRW7	109	11311	9342	O95721	VPS45	SNAP29	2.08195e-08	0.00504952	0.99495	2
260	UBA2	-0.928763	-0.928763	0.00112029	0.00405426	-0.991483	-1.49829	2821	2	UBA2_4; UBA2_2	4	10054	Q9UBT2	110	10054	10055	Q9UBE0	UBA2	SAE1	4.30546e-12	2.16657e-05	0.999978	1	2	SUMO1-SUA1-UBA2 complex; SUA1-UBA2 complex	3; 2	2; 2	5755; 5756
261	VPS8	-0.923527	-0.855562	8.66888e-05	0.000827589	-0.975782	-1.75145	223	4	VPS8_1; VPS8_4; VPS8_2; VPS8_3	4	23355	Q8N3P4	111	23355	9392	Q8WUH2	VPS8	TGFBRAP1	3.97712e-05	0.00104644	0.998914	1	1	CORVET complex	6	5	6388
262	IPO11	-0.918503	-0.889783	0.00014757	0.00118719	-0.987607	-1.6465	375	3	IPO11_1; IPO11_2; IPO11_4	4	51194	Q9UI26	113	51194	10902	Q9H0E9	IPO11	BRD8	1.58614e-11	0.000441122	0.999559	1
263	NELFCD	-0.917679	-0.948557	0.000665259	0.00297107	-0.955638	-1.71529	1718	4	NELFCD_4; NELFCD_3; NELFCD_1; NELFCD_2	4	51497	Q8IXH7	114	51497	25920	Q8WX92	NELFCD	NELFB	4.52133e-12	1.37346e-08	1	4	1	NELF complex (Negative elongation factor complex)	4	4	2598
264	NELFCD	-0.917679	-0.948557	0.000665259	0.00297107	-0.955638	-1.71529	1718	4	NELFCD_4; NELFCD_3; NELFCD_1; NELFCD_2	4	51497	Q8IXH7	114	51497	7936	P18615	NELFCD	NELFE	1.2176e-23	8.70881e-16	1	4	1	NELF complex (Negative elongation factor complex)	4	4	2598
265	NELFCD	-0.917679	-0.948557	0.000665259	0.00297107	-0.955638	-1.71529	1718	4	NELFCD_4; NELFCD_3; NELFCD_1; NELFCD_2	4	51497	Q8IXH7	114	51497	7469	Q9H3P2	NELFCD	NELFA	1.59423e-20	2.20076e-16	1	4	1	NELF complex (Negative elongation factor complex)	4	4	2598
266	NELFCD	-0.917679	-0.948557	0.000665259	0.00297107	-0.955638	-1.71529	1718	4	NELFCD_4; NELFCD_3; NELFCD_1; NELFCD_2	4	51497	Q8IXH7	114	51497	2235	P22830	NELFCD	FECH	2.50605e-20	2.46407e-09	1	4	1	NELF complex (Negative elongation factor complex)	4	4	2598
267	NELFA	-0.914918	-0.976188	0.000239016	0.00156936	-0.984967	-1.64209	608	3	NELFA_2; NELFA_1; NELFA_3	4	7469	Q9H3P2	115	7469	51497	Q8IXH7	NELFA	NELFCD	1.59423e-20	2.20076e-16	1	3	1	NELF complex (Negative elongation factor complex)	4	4	2598
268	NELFA	-0.914918	-0.976188	0.000239016	0.00156936	-0.984967	-1.64209	608	3	NELFA_2; NELFA_1; NELFA_3	4	7469	Q9H3P2	115	7469	25920	Q8WX92	NELFA	NELFB	2.56344e-12	3.03034e-08	1	3	1	NELF complex (Negative elongation factor complex)	4	4	2598
269	NELFA	-0.914918	-0.976188	0.000239016	0.00156936	-0.984967	-1.64209	608	3	NELFA_2; NELFA_1; NELFA_3	4	7469	Q9H3P2	115	7469	7936	P18615	NELFA	NELFE	4.87637e-22	1.75453e-15	1	3	1	NELF complex (Negative elongation factor complex)	4	4	2598
270	DPY30	-0.913955	-1.18312	0.00522734	0.0109759	-0.948881	-1.58193	13318	3	DPY30_4; DPY30_2; DPY30_3	4	84661	Q9C005	117	84661	9070	Q9UBL3	DPY30	ASH2L	1.00181e-13	0.0257097	0.97429	1	10	Menin-associated histone methyltransferase complex; PTIP-HMT complex; Emerin complex 32; MLL2 complex; MLL3 complex; MLL1 complex; MLL4 complex; Set1A complex; Set1B complex; WRAD complex (WDR5, RBBP5, ASH2L, DPY30)	7; 10; 22; 10; 9; 8; 9; 16; 18; 4	4; 6; 6; 3; 6; 3; 5; 7; 9; 3	1254; 5195; 5614; 6460; 6461; 6462; 6467; 6469; 6470; 6849
271	POLR3B	-0.909713	-0.909713	0.00166853	0.00509286	-0.989282	-1.49497	4202	2	POLR3B_4; POLR3B_3	4	55703	Q9NW08	119	55703	51728	Q9Y2Y1	POLR3B	POLR3K	6.27059e-14	2.08527e-06	0.999998	5
272	POLR3B	-0.909713	-0.909713	0.00166853	0.00509286	-0.989282	-1.49497	4202	2	POLR3B_4; POLR3B_3	4	55703	Q9NW08	119	55703	5435	P61218	POLR3B	POLR2F	1.36528e-12	1.61784e-05	0.999984	5
273	POLR3B	-0.909713	-0.909713	0.00166853	0.00509286	-0.989282	-1.49497	4202	2	POLR3B_4; POLR3B_3	4	55703	Q9NW08	119	55703	8409	Q9UBK9	POLR3B	UXT	9.34014e-14	0.0328552	0.967145	5
274	POLR3B	-0.909713	-0.909713	0.00166853	0.00509286	-0.989282	-1.49497	4202	2	POLR3B_4; POLR3B_3	4	55703	Q9NW08	119	55703	51184	Q9UHW5	POLR3B	GPN3	2.85365e-14	0.00217731	0.997823	5
275	POLR3B	-0.909713	-0.909713	0.00166853	0.00509286	-0.989282	-1.49497	4202	2	POLR3B_4; POLR3B_3	4	55703	Q9NW08	119	55703	9533	O15160	POLR3B	POLR1C	2.80654e-14	1.88885e-05	0.999981	5
276	GTF3C3	-0.90817	-0.90817	0.00691946	0.0131415	-0.976052	-1.47497	17429	2	GTF3C3_3; GTF3C3_1	4	9330	Q9Y5Q9	120	9330	9328	Q9Y5Q8	GTF3C3	GTF3C5	1.54315e-14	0.0540346	0.945965	2	4	transcription factor IIIC multisubunit complex; TFIIIC containing-TOP1-SUB1 complex; 5S-DNA-TFIIIA-TFIIIC2 subcomplex; 5S-DNA-TFIIIA-TFIIIC2-TFIIIB subcomplex	5; 7; 6; 9	3; 3; 3; 3	1105; 1106; 1113; 1114
277	GTF3C3	-0.90817	-0.90817	0.00691946	0.0131415	-0.976052	-1.47497	17429	2	GTF3C3_3; GTF3C3_1	4	9330	Q9Y5Q9	120	9330	9329	Q9UKN8	GTF3C3	GTF3C4	1.75538e-21	1.20937e-05	0.999988	2	4	transcription factor IIIC multisubunit complex; TFIIIC containing-TOP1-SUB1 complex; 5S-DNA-TFIIIA-TFIIIC2 subcomplex; 5S-DNA-TFIIIA-TFIIIC2-TFIIIB subcomplex	5; 7; 6; 9	3; 3; 3; 3	1105; 1106; 1113; 1114
278	LSMD1	-0.907636	-0.907636	0.0431464	0.0468964	-0.930499	-1.40614	108684	2	LSMD1_1; LSMD1_4	4	84316	Q9BRA0	121	84316	60560	Q5VZE5	LSMD1	NAA35	4.55785e-07	6.43355e-06	0.999993	3
279	LSMD1	-0.907636	-0.907636	0.0431464	0.0468964	-0.930499	-1.40614	108684	2	LSMD1_1; LSMD1_4	4	84316	Q9BRA0	121	84316	8667	O15372	LSMD1	EIF3H	1.83633e-10	0.0574869	0.942513	3
280	LSMD1	-0.907636	-0.907636	0.0431464	0.0468964	-0.930499	-1.40614	108684	2	LSMD1_1; LSMD1_4	4	84316	Q9BRA0	121	84316	122830	Q147X3	LSMD1	NAA30	7.518e-20	4.75066e-15	1	3
281	MIOS	-0.907221	-0.907221	0.00372214	0.00887646	-0.983164	-1.48572	9375	2	MIOS_1; MIOS_3	4	54468	Q9NXC5	123	54468	5929	Q15291	MIOS	RBBP5	3.01608e-12	3.39704e-05	0.999966	1	3	GATOR2 complex; GATOR complex; SOG complex	5; 8; 8	3; 3; 3	6216; 6217; 6753
282	EPC2	-0.906451	-0.906451	0.00171736	0.00510482	-0.989098	-1.49469	4325	2	EPC2_4; EPC2_1	4	26122	Q52LR7	124	26122	10902	Q9H0E9	EPC2	BRD8	5.70942e-08	0.000407023	0.999593	3	2	NuA4/Tip60-HAT complex A; NuA4/Tip60 HAT complex	15; 24	4; 5	798; 2857
283	EPC2	-0.906451	-0.906451	0.00171736	0.00510482	-0.989098	-1.49469	4325	2	EPC2_4; EPC2_1	4	26122	Q52LR7	124	26122	54799	Q05BQ5	EPC2	MBTD1	3.03232e-09	2.83574e-06	0.999997	3	2	NuA4/Tip60-HAT complex A; NuA4/Tip60 HAT complex	15; 24	4; 5	798; 2857
284	EPC2	-0.906451	-0.906451	0.00171736	0.00510482	-0.989098	-1.49469	4325	2	EPC2_4; EPC2_1	4	26122	Q52LR7	124	26122	55257	Q9NV56	EPC2	MRGBP	3.41683e-17	4.81777e-06	0.999995	3	2	NuA4/Tip60-HAT complex A; NuA4/Tip60 HAT complex	15; 24	4; 5	798; 2857
285	WDR61	-0.905531	-0.974443	4.02484e-05	0.000543733	-0.980211	-1.7594	103	4	WDR61_4; WDR61_1; WDR61_3; WDR61_2	4	80349	Q9GZS3	126	80349	9646	Q6PD62	WDR61	CTR9	7.38394e-13	2.14106e-07	1	2	3	Paf complex; SKI complex; CUL4A-DDB1-WDR61 complex	5; 3; 3	3; 1; 1	1167; 1168; 6494
286	WDR61	-0.905531	-0.974443	4.02484e-05	0.000543733	-0.980211	-1.7594	103	4	WDR61_4; WDR61_1; WDR61_3; WDR61_2	4	80349	Q9GZS3	126	80349	123169	Q8WVC0	WDR61	LEO1	1.24218e-11	2.24073e-08	1	2	3	Paf complex; SKI complex; CUL4A-DDB1-WDR61 complex	5; 3; 3	3; 1; 1	1167; 1168; 6494
287	RRAGA	-0.90491	-0.785952	0.000241103	0.00156936	-0.967321	-1.73626	622	4	RRAGA_1; RRAGA_4; RRAGA_2; RRAGA_3	4	10670	Q7L523	127	10670	28956	Q9Y2Q5	RRAGA	LAMTOR2	2.37714e-21	1.41814e-08	1	6
288	RRAGA	-0.90491	-0.785952	0.000241103	0.00156936	-0.967321	-1.73626	622	4	RRAGA_1; RRAGA_4; RRAGA_2; RRAGA_3	4	10670	Q7L523	127	10670	57521	Q8N122	RRAGA	RPTOR	1.78559e-08	0.0200229	0.979977	6
289	RRAGA	-0.90491	-0.785952	0.000241103	0.00156936	-0.967321	-1.73626	622	4	RRAGA_1; RRAGA_4; RRAGA_2; RRAGA_3	4	10670	Q7L523	127	10670	10542	O43504	RRAGA	LAMTOR5	8.01889e-16	2.65896e-07	1	6
290	RRAGA	-0.90491	-0.785952	0.000241103	0.00156936	-0.967321	-1.73626	622	4	RRAGA_1; RRAGA_4; RRAGA_2; RRAGA_3	4	10670	Q7L523	127	10670	55004	Q6IAA8	RRAGA	LAMTOR1	5.82195e-11	2.92807e-09	1	6
291	RRAGA	-0.90491	-0.785952	0.000241103	0.00156936	-0.967321	-1.73626	622	4	RRAGA_1; RRAGA_4; RRAGA_2; RRAGA_3	4	10670	Q7L523	127	10670	8649	Q9UHA4	RRAGA	LAMTOR3	1.81709e-10	2.68936e-09	1	6
292	RRAGA	-0.90491	-0.785952	0.000241103	0.00156936	-0.967321	-1.73626	622	4	RRAGA_1; RRAGA_4; RRAGA_2; RRAGA_3	4	10670	Q7L523	127	10670	389541	Q0VGL1	RRAGA	LAMTOR4	3.16113e-10	7.59958e-09	1	6
293	CCDC115	-0.899952	-0.994728	0.00200161	0.00575078	-0.965121	-1.60901	5099	3	CCDC115_4; CCDC115_1; CCDC115_2	4	84317	Q96NT0	129	84317	5917	P54136	CCDC115	RARS	3.54891e-14	0.0751325	0.924867	2
294	CCDC115	-0.899952	-0.994728	0.00200161	0.00575078	-0.965121	-1.60901	5099	3	CCDC115_4; CCDC115_1; CCDC115_2	4	84317	Q96NT0	129	84317	10159	O75787	CCDC115	ATP6AP2	5.05732e-06	0.000742217	0.999253	2
295	BPTF	-0.898507	-0.877847	0.00032379	0.00189625	-0.983334	-1.63937	824	3	BPTF_3; BPTF_4; BPTF_2	4	2186	Q12830	131	2186	5928	Q09028	BPTF	RBBP4	2.1541e-15	9.37825e-08	1	1	1	hNURF complex	4	2	100
296	TIPARP	-0.897963	-0.891753	0.00027903	0.00176801	-0.965831	-1.73359	720	4	TIPARP_4; TIPARP_2; TIPARP_1; TIPARP_3	4	25976	Q7Z3E1	132	25976	8192	Q16740	TIPARP	CLPP	2.57134e-08	0.144991	0.855009	1
297	EIF3H	-0.89468	-0.905875	0.000175043	0.00130574	-0.986841	-1.64522	445	3	EIF3H_2; EIF3H_1; EIF3H_3	4	8667	O15372	135	8667	8664	O15371	EIF3H	EIF3D	1.4082e-23	3.68188e-10	1	3	1	eIF3 complex (EIF3S6, EIF3S5, EIF3S4, EIF3S3, EIF3S6IP, EIF3S2, EIF3S9, EIF3S12, EIF3S10, EIF3S8, EIF3S1, EIF3S7, PCID1)	13	3	1097
298	EIF3H	-0.89468	-0.905875	0.000175043	0.00130574	-0.986841	-1.64522	445	3	EIF3H_2; EIF3H_1; EIF3H_3	4	8667	O15372	135	8667	84316	Q9BRA0	EIF3H	LSMD1	1.83633e-10	0.0574869	0.942513	3	1	eIF3 complex (EIF3S6, EIF3S5, EIF3S4, EIF3S3, EIF3S6IP, EIF3S2, EIF3S9, EIF3S12, EIF3S10, EIF3S8, EIF3S1, EIF3S7, PCID1)	13	3	1097
299	EIF3H	-0.89468	-0.905875	0.000175043	0.00130574	-0.986841	-1.64522	445	3	EIF3H_2; EIF3H_1; EIF3H_3	4	8667	O15372	135	8667	8668	Q13347	EIF3H	EIF3I	1.0883e-24	6.41099e-10	1	3	1	eIF3 complex (EIF3S6, EIF3S5, EIF3S4, EIF3S3, EIF3S6IP, EIF3S2, EIF3S9, EIF3S12, EIF3S10, EIF3S8, EIF3S1, EIF3S7, PCID1)	13	3	1097
300	DIS3	-0.891546	-0.891546	0.00203416	0.00580261	-0.988033	-1.49308	5123	2	DIS3_4; DIS3_3	4	22894	Q9Y2L1	136	22894	84191	Q9H5X1	DIS3	FAM96A	3.25464e-13	0.000314332	0.999686	1	1	Exosome	23	7	789
301	PSMG1	-0.889761	-0.889761	0.00429737	0.00952825	-0.981773	-1.48362	10824	2	PSMG1_4; PSMG1_2	4	8624	O95456	137	8624	56984	Q969U7	PSMG1	PSMG2	6.54352e-08	4.45316e-08	1	2	1	PAC1-PAC2 complex	2	2	3034
302	PSMG1	-0.889761	-0.889761	0.00429737	0.00952825	-0.981773	-1.48362	10824	2	PSMG1_4; PSMG1_2	4	8624	O95456	137	8624	5695	Q99436	PSMG1	PSMB7	3.57577e-09	0.000534352	0.999466	2	1	PAC1-PAC2 complex	2	2	3034
303	PDCL	-0.885977	-0.961256	0.00017779	0.00131235	-0.98667	-1.64493	452	3	PDCL_4; PDCL_1; PDCL_2	4	5082	Q13371	138	5082	57826	Q9Y3L5	PDCL	RAP2C	2.31533e-05	0.221658	0.778319	1	1	DRIP78-PHLP complex	2	1	3828
304	POLR1B	-0.884211	-0.933223	0.00013815	0.00112404	-0.987834	-1.64687	351	3	POLR1B_2; POLR1B_4; POLR1B_1	4	84172	Q9H9Y6	139	84172	5435	P61218	POLR1B	POLR2F	1.79957e-15	0.00178163	0.998218	4	1	TNF-alpha/NF-kappa B signaling complex 5	25	1	5233
305	POLR1B	-0.884211	-0.933223	0.00013815	0.00112404	-0.987834	-1.64687	351	3	POLR1B_2; POLR1B_4; POLR1B_1	4	84172	Q9H9Y6	139	84172	10533	O95352	POLR1B	ATG7	1.64377e-14	0.168389	0.831611	4	1	TNF-alpha/NF-kappa B signaling complex 5	25	1	5233
306	POLR1B	-0.884211	-0.933223	0.00013815	0.00112404	-0.987834	-1.64687	351	3	POLR1B_2; POLR1B_4; POLR1B_1	4	84172	Q9H9Y6	139	84172	51184	Q9UHW5	POLR1B	GPN3	2.06594e-14	0.0845077	0.915492	4	1	TNF-alpha/NF-kappa B signaling complex 5	25	1	5233
307	POLR1B	-0.884211	-0.933223	0.00013815	0.00112404	-0.987834	-1.64687	351	3	POLR1B_2; POLR1B_4; POLR1B_1	4	84172	Q9H9Y6	139	84172	9533	O15160	POLR1B	POLR1C	3.05239e-15	0.00270793	0.997292	4	1	TNF-alpha/NF-kappa B signaling complex 5	25	1	5233
308	KARS	-0.880441	-0.880441	0.0062696	0.0123325	-0.977387	-1.47699	15792	2	KARS_4; KARS_3	4	3735	Q15046	140	3735	2058	P07814	KARS	EPRS	1.49306e-13	0.00169778	0.998302	3	1	Multisynthetase complex	11	4	3040
309	KARS	-0.880441	-0.880441	0.0062696	0.0123325	-0.977387	-1.47699	15792	2	KARS_4; KARS_3	4	3735	Q15046	140	3735	5917	P54136	KARS	RARS	2.34883e-29	5.04509e-05	0.99995	3	1	Multisynthetase complex	11	4	3040
310	KARS	-0.880441	-0.880441	0.0062696	0.0123325	-0.977387	-1.47699	15792	2	KARS_4; KARS_3	4	3735	Q15046	140	3735	4141	P56192	KARS	MARS	4.41356e-14	0.0025723	0.997428	3	1	Multisynthetase complex	11	4	3040
311	SRP14	-0.873524	-0.873524	0.014931	0.021729	-0.962638	-1.4547	37610	2	SRP14_4; SRP14_2	4	6727	P37108	142	6727	4931	O15381	SRP14	NVL	6.45126e-14	0.109951	0.890049	7	1	Nop56p-associated pre-rRNA complex	105	6	3055
312	SRP14	-0.873524	-0.873524	0.014931	0.021729	-0.962638	-1.4547	37610	2	SRP14_4; SRP14_2	4	6727	P37108	142	6727	54881	Q9NXF1	SRP14	TEX10	2.9001e-09	0.228745	0.771255	7	1	Nop56p-associated pre-rRNA complex	105	6	3055
313	SRP14	-0.873524	-0.873524	0.014931	0.021729	-0.962638	-1.4547	37610	2	SRP14_4; SRP14_2	4	6727	P37108	142	6727	63977	P57071	SRP14	PRDM15	0.00443935	0.145371	0.850189	7	1	Nop56p-associated pre-rRNA complex	105	6	3055
314	SRP14	-0.873524	-0.873524	0.014931	0.021729	-0.962638	-1.4547	37610	2	SRP14_4; SRP14_2	4	6727	P37108	142	6727	22930	Q15042	SRP14	RAB3GAP1	7.1967e-05	0.155733	0.844195	7	1	Nop56p-associated pre-rRNA complex	105	6	3055
315	SRP14	-0.873524	-0.873524	0.014931	0.021729	-0.962638	-1.4547	37610	2	SRP14_4; SRP14_2	4	6727	P37108	142	6727	1662	Q13206	SRP14	DDX10	2.78461e-12	0.101293	0.898707	7	1	Nop56p-associated pre-rRNA complex	105	6	3055
316	SRP14	-0.873524	-0.873524	0.014931	0.021729	-0.962638	-1.4547	37610	2	SRP14_4; SRP14_2	4	6727	P37108	142	6727	26574	Q9NY61	SRP14	AATF	3.49816e-08	0.13543	0.86457	7	1	Nop56p-associated pre-rRNA complex	105	6	3055
317	SRP14	-0.873524	-0.873524	0.014931	0.021729	-0.962638	-1.4547	37610	2	SRP14_4; SRP14_2	4	6727	P37108	142	6727	6726	P49458	SRP14	SRP9	3.0924e-24	5.66633e-07	0.999999	7	1	Nop56p-associated pre-rRNA complex	105	6	3055
318	WDR24	-0.87292	-0.721983	0.000580859	0.00271827	-0.978848	-1.63189	1479	3	WDR24_3; WDR24_2; WDR24_1	4	84219	Q96S15	143	84219	5929	Q15291	WDR24	RBBP5	6.92814e-09	1.84631e-06	0.999998	1	3	GATOR2 complex; GATOR complex; SOG complex	5; 8; 8	3; 3; 3	6216; 6217; 6753
319	RPSA	-0.871792	-0.871792	0.015284	0.0219406	-0.962126	-1.45393	38499	2	RPSA_3; RPSA_4	4	3921	P08865	145	3921	65095	Q8N9T8	RPSA	KRI1	1.97881e-10	0.162964	0.837036	13	2	Ribosome, cytoplasmic; 40S ribosomal subunit, cytoplasmic	81; 31	4; 3	306; 338
320	RPSA	-0.871792	-0.871792	0.015284	0.0219406	-0.962126	-1.45393	38499	2	RPSA_3; RPSA_4	4	3921	P08865	145	3921	11103	Q13601	RPSA	KRR1	6.7146e-34	0.181065	0.818935	13	2	Ribosome, cytoplasmic; 40S ribosomal subunit, cytoplasmic	81; 31	4; 3	306; 338
321	RPSA	-0.871792	-0.871792	0.015284	0.0219406	-0.962126	-1.45393	38499	2	RPSA_3; RPSA_4	4	3921	P08865	145	3921	6741	P05455	RPSA	SSB	2.25679e-13	0.0933037	0.906696	13	2	Ribosome, cytoplasmic; 40S ribosomal subunit, cytoplasmic	81; 31	4; 3	306; 338
322	RPSA	-0.871792	-0.871792	0.015284	0.0219406	-0.962126	-1.45393	38499	2	RPSA_3; RPSA_4	4	3921	P08865	145	3921	26574	Q9NY61	RPSA	AATF	4.45731e-06	0.136611	0.863384	13	2	Ribosome, cytoplasmic; 40S ribosomal subunit, cytoplasmic	81; 31	4; 3	306; 338
323	RPSA	-0.871792	-0.871792	0.015284	0.0219406	-0.962126	-1.45393	38499	2	RPSA_3; RPSA_4	4	3921	P08865	145	3921	51491	Q9Y3C1	RPSA	NOP16	1.94997e-33	0.0153938	0.984606	13	2	Ribosome, cytoplasmic; 40S ribosomal subunit, cytoplasmic	81; 31	4; 3	306; 338
324	RPSA	-0.871792	-0.871792	0.015284	0.0219406	-0.962126	-1.45393	38499	2	RPSA_3; RPSA_4	4	3921	P08865	145	3921	1662	Q13206	RPSA	DDX10	2.53504e-11	0.193142	0.806858	13	2	Ribosome, cytoplasmic; 40S ribosomal subunit, cytoplasmic	81; 31	4; 3	306; 338
325	RPSA	-0.871792	-0.871792	0.015284	0.0219406	-0.962126	-1.45393	38499	2	RPSA_3; RPSA_4	4	3921	P08865	145	3921	84294	Q9BRU9	RPSA	UTP23	0.151684	0.0297299	0.818586	13	2	Ribosome, cytoplasmic; 40S ribosomal subunit, cytoplasmic	81; 31	4; 3	306; 338
326	RPSA	-0.871792	-0.871792	0.015284	0.0219406	-0.962126	-1.45393	38499	2	RPSA_3; RPSA_4	4	3921	P08865	145	3921	55922	O15226	RPSA	NKRF	2.25699e-15	0.191607	0.808393	13	2	Ribosome, cytoplasmic; 40S ribosomal subunit, cytoplasmic	81; 31	4; 3	306; 338
327	RPSA	-0.871792	-0.871792	0.015284	0.0219406	-0.962126	-1.45393	38499	2	RPSA_3; RPSA_4	4	3921	P08865	145	3921	63977	P57071	RPSA	PRDM15	0.0235485	0.000596048	0.975855	13	2	Ribosome, cytoplasmic; 40S ribosomal subunit, cytoplasmic	81; 31	4; 3	306; 338
328	RPSA	-0.871792	-0.871792	0.015284	0.0219406	-0.962126	-1.45393	38499	2	RPSA_3; RPSA_4	4	3921	P08865	145	3921	10664	P49711	RPSA	CTCF	5.72909e-07	0.0217366	0.978263	13	2	Ribosome, cytoplasmic; 40S ribosomal subunit, cytoplasmic	81; 31	4; 3	306; 338
329	RPSA	-0.871792	-0.871792	0.015284	0.0219406	-0.962126	-1.45393	38499	2	RPSA_3; RPSA_4	4	3921	P08865	145	3921	170506	Q9H2U1	RPSA	DHX36	0.000624044	0.104324	0.895052	13	2	Ribosome, cytoplasmic; 40S ribosomal subunit, cytoplasmic	81; 31	4; 3	306; 338
330	RPSA	-0.871792	-0.871792	0.015284	0.0219406	-0.962126	-1.45393	38499	2	RPSA_3; RPSA_4	4	3921	P08865	145	3921	55720	Q2NL82	RPSA	TSR1	5.87642e-31	0.171014	0.828986	13	2	Ribosome, cytoplasmic; 40S ribosomal subunit, cytoplasmic	81; 31	4; 3	306; 338
331	RPSA	-0.871792	-0.871792	0.015284	0.0219406	-0.962126	-1.45393	38499	2	RPSA_3; RPSA_4	4	3921	P08865	145	3921	6223	P39019	RPSA	RPS19	1.10494e-27	0.000598561	0.999401	13	2	Ribosome, cytoplasmic; 40S ribosomal subunit, cytoplasmic	81; 31	4; 3	306; 338
332	KIAA0196	-0.871	-0.960284	0.00377019	0.00887646	-0.924861	-1.66005	9741	4	KIAA0196_2; KIAA0196_3; KIAA0196_1; KIAA0196_4	4	9897	Q12768	146	9897	51019	Q9Y3C0	KIAA0196	CCDC53	9.74794e-10	5.2242e-08	1	1	3	WASH complex; WASH-CAPZalpa/beta complex; PI4K2A-WASH complex	5; 7; 14	2; 2; 1	6481; 6484; 6671
333	WDR46	-0.868373	-0.868373	0.00275905	0.00716474	-0.985847	-1.48978	6949	2	WDR46_4; WDR46_3	4	9277	O15213	147	9277	4931	O15381	WDR46	NVL	2.11862e-15	0.213464	0.786536	3
334	WDR46	-0.868373	-0.868373	0.00275905	0.00716474	-0.985847	-1.48978	6949	2	WDR46_4; WDR46_3	4	9277	O15213	147	9277	55922	O15226	WDR46	NKRF	1.47546e-13	0.212248	0.787752	3
335	WDR46	-0.868373	-0.868373	0.00275905	0.00716474	-0.985847	-1.48978	6949	2	WDR46_4; WDR46_3	4	9277	O15213	147	9277	51634	Q9Y388	WDR46	RBMX2	0.00574452	0.136388	0.857867	3
336	MRGBP	-0.867258	-0.867258	0.0175241	0.0239452	-0.958989	-1.44919	44142	2	MRGBP_2; MRGBP_3	4	55257	Q9NV56	148	55257	80314	Q9H2F5	MRGBP	EPC1	2.59772e-12	2.68646e-05	0.999973	4	3	NuA4/Tip60-HAT complex; NuA4/Tip60-HAT complex; NuA4/Tip60-HAT complex A	31; 31; 15	6; 6; 4	528; 529; 798
337	MRGBP	-0.867258	-0.867258	0.0175241	0.0239452	-0.958989	-1.44919	44142	2	MRGBP_2; MRGBP_3	4	55257	Q9NV56	148	55257	26122	Q52LR7	MRGBP	EPC2	3.41683e-17	4.81777e-06	0.999995	4	3	NuA4/Tip60-HAT complex; NuA4/Tip60-HAT complex; NuA4/Tip60-HAT complex A	31; 31; 15	6; 6; 4	528; 529; 798
338	MRGBP	-0.867258	-0.867258	0.0175241	0.0239452	-0.958989	-1.44919	44142	2	MRGBP_2; MRGBP_3	4	55257	Q9NV56	148	55257	54799	Q05BQ5	MRGBP	MBTD1	3.07235e-10	5.75396e-06	0.999994	4	3	NuA4/Tip60-HAT complex; NuA4/Tip60-HAT complex; NuA4/Tip60-HAT complex A	31; 31; 15	6; 6; 4	528; 529; 798
339	MRGBP	-0.867258	-0.867258	0.0175241	0.0239452	-0.958989	-1.44919	44142	2	MRGBP_2; MRGBP_3	4	55257	Q9NV56	148	55257	10902	Q9H0E9	MRGBP	BRD8	1.27708e-21	2.48165e-10	1	4	3	NuA4/Tip60-HAT complex; NuA4/Tip60-HAT complex; NuA4/Tip60-HAT complex A	31; 31; 15	6; 6; 4	528; 529; 798
340	NAA30	-0.864886	-0.849453	3.09603e-06	7.75201e-05	-0.989381	-1.77586	7	4	NAA30_4; NAA30_2; NAA30_3; NAA30_1	4	122830	Q147X3	150	122830	60560	Q5VZE5	NAA30	NAA35	7.37569e-15	3.44203e-11	1	3
341	NAA30	-0.864886	-0.849453	3.09603e-06	7.75201e-05	-0.989381	-1.77586	7	4	NAA30_4; NAA30_2; NAA30_3; NAA30_1	4	122830	Q147X3	150	122830	84316	Q9BRA0	NAA30	LSMD1	1.0517e-20	3.69628e-17	1	3
342	NAA30	-0.864886	-0.849453	3.09603e-06	7.75201e-05	-0.989381	-1.77586	7	4	NAA30_4; NAA30_2; NAA30_3; NAA30_1	4	122830	Q147X3	150	122830	10421	O95400	NAA30	CD2BP2	1.77115e-16	0.000883953	0.999116	3
343	SRSF1	-0.864006	-0.864006	0.00229497	0.00634441	-0.987196	-1.49181	5780	2	SRSF1_2; SRSF1_1	4	6426	Q07955	151	6426	10250	Q8IYB3	SRSF1	SRRM1	2.36611e-13	0.22456	0.77544	14	4	Spliceosome; C complex spliceosome; CDC5L complex; 17S U2 snRNP	143; 80; 30; 33	9; 3; 5; 2	351; 1181; 1183; 2755
344	SRSF1	-0.864006	-0.864006	0.00229497	0.00634441	-0.987196	-1.49181	5780	2	SRSF1_2; SRSF1_1	4	6426	Q07955	151	6426	26574	Q9NY61	SRSF1	AATF	2.5335e-11	0.0475063	0.952494	14	4	Spliceosome; C complex spliceosome; CDC5L complex; 17S U2 snRNP	143; 80; 30; 33	9; 3; 5; 2	351; 1181; 1183; 2755
345	SRSF1	-0.864006	-0.864006	0.00229497	0.00634441	-0.987196	-1.49181	5780	2	SRSF1_2; SRSF1_1	4	6426	Q07955	151	6426	51491	Q9Y3C1	SRSF1	NOP16	1.87231e-13	0.0334622	0.966538	14	4	Spliceosome; C complex spliceosome; CDC5L complex; 17S U2 snRNP	143; 80; 30; 33	9; 3; 5; 2	351; 1181; 1183; 2755
346	SRSF1	-0.864006	-0.864006	0.00229497	0.00634441	-0.987196	-1.49181	5780	2	SRSF1_2; SRSF1_1	4	6426	Q07955	151	6426	1662	Q13206	SRSF1	DDX10	6.87068e-13	0.0150031	0.984997	14	4	Spliceosome; C complex spliceosome; CDC5L complex; 17S U2 snRNP	143; 80; 30; 33	9; 3; 5; 2	351; 1181; 1183; 2755
347	SRSF1	-0.864006	-0.864006	0.00229497	0.00634441	-0.987196	-1.49181	5780	2	SRSF1_2; SRSF1_1	4	6426	Q07955	151	6426	65095	Q8N9T8	SRSF1	KRI1	3.01708e-12	0.013757	0.986243	14	4	Spliceosome; C complex spliceosome; CDC5L complex; 17S U2 snRNP	143; 80; 30; 33	9; 3; 5; 2	351; 1181; 1183; 2755
348	SRSF1	-0.864006	-0.864006	0.00229497	0.00634441	-0.987196	-1.49181	5780	2	SRSF1_2; SRSF1_1	4	6426	Q07955	151	6426	55922	O15226	SRSF1	NKRF	8.45059e-12	0.0154134	0.984587	14	4	Spliceosome; C complex spliceosome; CDC5L complex; 17S U2 snRNP	143; 80; 30; 33	9; 3; 5; 2	351; 1181; 1183; 2755
349	SRSF1	-0.864006	-0.864006	0.00229497	0.00634441	-0.987196	-1.49181	5780	2	SRSF1_2; SRSF1_1	4	6426	Q07955	151	6426	55720	Q2NL82	SRSF1	TSR1	3.59654e-13	0.145488	0.854512	14	4	Spliceosome; C complex spliceosome; CDC5L complex; 17S U2 snRNP	143; 80; 30; 33	9; 3; 5; 2	351; 1181; 1183; 2755
350	SRSF1	-0.864006	-0.864006	0.00229497	0.00634441	-0.987196	-1.49181	5780	2	SRSF1_2; SRSF1_1	4	6426	Q07955	151	6426	51634	Q9Y388	SRSF1	RBMX2	0.0754729	0.000648978	0.923878	14	4	Spliceosome; C complex spliceosome; CDC5L complex; 17S U2 snRNP	143; 80; 30; 33	9; 3; 5; 2	351; 1181; 1183; 2755
351	SRSF1	-0.864006	-0.864006	0.00229497	0.00634441	-0.987196	-1.49181	5780	2	SRSF1_2; SRSF1_1	4	6426	Q07955	151	6426	6223	P39019	SRSF1	RPS19	6.68718e-21	0.194547	0.805453	14	4	Spliceosome; C complex spliceosome; CDC5L complex; 17S U2 snRNP	143; 80; 30; 33	9; 3; 5; 2	351; 1181; 1183; 2755
352	SRSF1	-0.864006	-0.864006	0.00229497	0.00634441	-0.987196	-1.49181	5780	2	SRSF1_2; SRSF1_1	4	6426	Q07955	151	6426	11103	Q13601	SRSF1	KRR1	6.1688e-08	0.0777804	0.92222	14	4	Spliceosome; C complex spliceosome; CDC5L complex; 17S U2 snRNP	143; 80; 30; 33	9; 3; 5; 2	351; 1181; 1183; 2755
353	SRSF1	-0.864006	-0.864006	0.00229497	0.00634441	-0.987196	-1.49181	5780	2	SRSF1_2; SRSF1_1	4	6426	Q07955	151	6426	10664	P49711	SRSF1	CTCF	2.22068e-08	0.00105455	0.998945	14	4	Spliceosome; C complex spliceosome; CDC5L complex; 17S U2 snRNP	143; 80; 30; 33	9; 3; 5; 2	351; 1181; 1183; 2755
354	SRSF1	-0.864006	-0.864006	0.00229497	0.00634441	-0.987196	-1.49181	5780	2	SRSF1_2; SRSF1_1	4	6426	Q07955	151	6426	170506	Q9H2U1	SRSF1	DHX36	0.0365301	0.00557288	0.957897	14	4	Spliceosome; C complex spliceosome; CDC5L complex; 17S U2 snRNP	143; 80; 30; 33	9; 3; 5; 2	351; 1181; 1183; 2755
355	SRSF1	-0.864006	-0.864006	0.00229497	0.00634441	-0.987196	-1.49181	5780	2	SRSF1_2; SRSF1_1	4	6426	Q07955	151	6426	55082	Q9NWB6	SRSF1	ARGLU1	5.8915e-15	0.238834	0.761166	14	4	Spliceosome; C complex spliceosome; CDC5L complex; 17S U2 snRNP	143; 80; 30; 33	9; 3; 5; 2	351; 1181; 1183; 2755
356	SRSF1	-0.864006	-0.864006	0.00229497	0.00634441	-0.987196	-1.49181	5780	2	SRSF1_2; SRSF1_1	4	6426	Q07955	151	6426	55216	Q6ZUT1	SRSF1	C11orf57	1.42034e-14	0.172449	0.827551	14	4	Spliceosome; C complex spliceosome; CDC5L complex; 17S U2 snRNP	143; 80; 30; 33	9; 3; 5; 2	351; 1181; 1183; 2755
357	DERL1	-0.860181	-0.786078	0.00105497	0.00391376	-0.972858	-1.62191	2687	3	DERL1_3; DERL1_2; DERL1_1	4	79139	Q9BUN8	152	79139	26580	Q96G97	DERL1	BSCL2	5.786e-12	0.0152981	0.984702	1	7	Retrotranslocation complex; SVIP-VCP-DERL1 complex; gp78-VCP-DERL1 complex; VCP-VIMP-DERL1 complex; VCP-VIMP-DERL1-DERL2-HRD1-SEL1L complex; SELK multiprotein complex; VCP-SELK-DERL1 complex	3; 3; 3; 3; 6; 10; 3	1; 1; 1; 1; 2; 4; 1	156; 4976; 4977; 4997; 4999; 6131; 7136
358	ILF2	-0.859792	-0.919093	0.000716655	0.00310051	-0.976904	-1.62865	1825	3	ILF2_3; ILF2_4; ILF2_2	4	3608	Q12905	153	3608	3609	Q12906	ILF2	ILF3	2.54953e-13	0.000416357	0.999584	2	4	CDC5L complex; Large Drosha complex; Nop56p-associated pre-rRNA complex; DNA-PK-Ku-eIF2-NF90-NF45 complex	30; 20; 105; 8	5; 2; 6; 4	1183; 1332; 3055; 5183
359	ILF2	-0.859792	-0.919093	0.000716655	0.00310051	-0.976904	-1.62865	1825	3	ILF2_3; ILF2_4; ILF2_2	4	3608	Q12905	153	3608	170506	Q9H2U1	ILF2	DHX36	4.349e-08	0.00929394	0.990706	2	4	CDC5L complex; Large Drosha complex; Nop56p-associated pre-rRNA complex; DNA-PK-Ku-eIF2-NF90-NF45 complex	30; 20; 105; 8	5; 2; 6; 4	1183; 1332; 3055; 5183
360	VHL	-0.859123	-0.901316	1.19971e-05	0.000220255	-0.985293	-1.76852	30	4	VHL_2; VHL_4; VHL_1; VHL_3	4	7428	P40337	154	7428	55729	Q6VMQ6	VHL	ATF7IP	1.0572e-10	2.0723e-08	1	2	7	Ubiquitin E3 ligase (VHL, TCEB1, TCEB2, CUL2, RBX1); Ubiquitin E3 ligase (VHL, TCEB1, TCEB2, CUL2); VHL-VDU1-TCEB1-TCEB2 complex; VHL-TCEB1-TCEB2 complex; VHL-TBP1-HIF1A complex; HIF1alpha-VHL-ElonginB-ElonginC complex; VHL-ElonginB-ElonginC complex	5; 4; 4; 3; 3; 4; 3	2; 2; 2; 2; 1; 2; 2	205; 622; 5267; 5270; 5273; 6485; 7576
361	VHL	-0.859123	-0.901316	1.19971e-05	0.000220255	-0.985293	-1.76852	30	4	VHL_2; VHL_4; VHL_1; VHL_3	4	7428	P40337	154	7428	6923	Q15370	VHL	TCEB2	3.74305e-13	0.00255711	0.997443	2	7	Ubiquitin E3 ligase (VHL, TCEB1, TCEB2, CUL2, RBX1); Ubiquitin E3 ligase (VHL, TCEB1, TCEB2, CUL2); VHL-VDU1-TCEB1-TCEB2 complex; VHL-TCEB1-TCEB2 complex; VHL-TBP1-HIF1A complex; HIF1alpha-VHL-ElonginB-ElonginC complex; VHL-ElonginB-ElonginC complex	5; 4; 4; 3; 3; 4; 3	2; 2; 2; 2; 1; 2; 2	205; 622; 5267; 5270; 5273; 6485; 7576
362	ATP6AP2	-0.850637	-0.850637	0.00428983	0.00952825	-0.981801	-1.48366	10805	2	ATP6AP2_2; ATP6AP2_1	4	10159	O75787	157	10159	203547	Q3ZAQ7	ATP6AP2	VMA21	1.79221e-07	4.72097e-05	0.999953	7
363	ATP6AP2	-0.850637	-0.850637	0.00428983	0.00952825	-0.981801	-1.48366	10805	2	ATP6AP2_2; ATP6AP2_1	4	10159	O75787	157	10159	51382	Q9Y5K8	ATP6AP2	ATP6V1D	1.7974e-10	0.015292	0.984708	7
364	ATP6AP2	-0.850637	-0.850637	0.00428983	0.00952825	-0.981801	-1.48366	10805	2	ATP6AP2_2; ATP6AP2_1	4	10159	O75787	157	10159	9296	Q16864	ATP6AP2	ATP6V1F	7.64854e-14	0.093793	0.906207	7
365	ATP6AP2	-0.850637	-0.850637	0.00428983	0.00952825	-0.981801	-1.48366	10805	2	ATP6AP2_2; ATP6AP2_1	4	10159	O75787	157	10159	528	P21283	ATP6AP2	ATP6V1C1	6.86985e-11	0.154967	0.845033	7
366	ATP6AP2	-0.850637	-0.850637	0.00428983	0.00952825	-0.981801	-1.48366	10805	2	ATP6AP2_2; ATP6AP2_1	4	10159	O75787	157	10159	537	Q15904	ATP6AP2	ATP6AP1	1.98857e-12	0.0154841	0.984516	7
367	ATP6AP2	-0.850637	-0.850637	0.00428983	0.00952825	-0.981801	-1.48366	10805	2	ATP6AP2_2; ATP6AP2_1	4	10159	O75787	157	10159	84317	Q96NT0	ATP6AP2	CCDC115	5.05732e-06	0.000742217	0.999253	7
368	ATP6AP2	-0.850637	-0.850637	0.00428983	0.00952825	-0.981801	-1.48366	10805	2	ATP6AP2_2; ATP6AP2_1	4	10159	O75787	157	10159	3557	P18510	ATP6AP2	IL1RN	0.0106473	0.0198873	0.969465	7
369	ANKS1A	-0.848221	-0.942708	0.000499235	0.00249966	-0.9593	-1.72187	1289	4	ANKS1A_3; ANKS1A_1; ANKS1A_2; ANKS1A_4	4	23294	Q92625	158	23294	84191	Q9H5X1	ANKS1A	FAM96A	7.78262e-07	0.00218295	0.997816	1
370	COMMD4	-0.84642	-0.646022	0.00186503	0.00547279	-0.966143	-1.61071	4751	3	COMMD4_2; COMMD4_4; COMMD4_3	4	54939	Q9H0A8	160	54939	57020	Q7Z3J2	COMMD4	C16orf62	1.3985e-10	2.84448e-06	0.999997	9	2	CCC-Wash (WASH1, FAM21C) complex; CCC complex	15; 13	9; 9	6639; 6645
371	COMMD4	-0.84642	-0.646022	0.00186503	0.00547279	-0.966143	-1.61071	4751	3	COMMD4_2; COMMD4_4; COMMD4_3	4	54939	Q9H0A8	160	54939	54520	Q567U6	COMMD4	CCDC93	1.51583e-13	1.50001e-06	0.999998	9	2	CCC-Wash (WASH1, FAM21C) complex; CCC complex	15; 13	9; 9	6639; 6645
372	COMMD4	-0.84642	-0.646022	0.00186503	0.00547279	-0.966143	-1.61071	4751	3	COMMD4_2; COMMD4_4; COMMD4_3	4	54939	Q9H0A8	160	54939	28991	Q9GZQ3	COMMD4	COMMD5	8.8886e-21	1.54093e-11	1	9	2	CCC-Wash (WASH1, FAM21C) complex; CCC complex	15; 13	9; 9	6639; 6645
373	COMMD4	-0.84642	-0.646022	0.00186503	0.00547279	-0.966143	-1.61071	4751	3	COMMD4_2; COMMD4_4; COMMD4_3	4	54939	Q9H0A8	160	54939	51699	Q9UBQ0	COMMD4	VPS29	4.2188e-21	0.0545137	0.945486	9	2	CCC-Wash (WASH1, FAM21C) complex; CCC complex	15; 13	9; 9	6639; 6645
374	COMMD4	-0.84642	-0.646022	0.00186503	0.00547279	-0.966143	-1.61071	4751	3	COMMD4_2; COMMD4_4; COMMD4_3	4	54939	Q9H0A8	160	54939	51397	Q9Y6G5	COMMD4	COMMD10	3.3032e-23	3.16034e-11	1	9	2	CCC-Wash (WASH1, FAM21C) complex; CCC complex	15; 13	9; 9	6639; 6645
375	COMMD4	-0.84642	-0.646022	0.00186503	0.00547279	-0.966143	-1.61071	4751	3	COMMD4_2; COMMD4_4; COMMD4_3	4	54939	Q9H0A8	160	54939	51122	Q86X83	COMMD4	COMMD2	3.1537e-23	6.88511e-10	1	9	2	CCC-Wash (WASH1, FAM21C) complex; CCC complex	15; 13	9; 9	6639; 6645
376	COMMD4	-0.84642	-0.646022	0.00186503	0.00547279	-0.966143	-1.61071	4751	3	COMMD4_2; COMMD4_4; COMMD4_3	4	54939	Q9H0A8	160	54939	54951	Q9NX08	COMMD4	COMMD8	7.03012e-21	2.68749e-13	1	9	2	CCC-Wash (WASH1, FAM21C) complex; CCC complex	15; 13	9; 9	6639; 6645
377	COMMD4	-0.84642	-0.646022	0.00186503	0.00547279	-0.966143	-1.61071	4751	3	COMMD4_2; COMMD4_4; COMMD4_3	4	54939	Q9H0A8	160	54939	28952	O60826	COMMD4	CCDC22	1.29095e-24	7.30804e-10	1	9	2	CCC-Wash (WASH1, FAM21C) complex; CCC complex	15; 13	9; 9	6639; 6645
378	COMMD4	-0.84642	-0.646022	0.00186503	0.00547279	-0.966143	-1.61071	4751	3	COMMD4_2; COMMD4_4; COMMD4_3	4	54939	Q9H0A8	160	54939	23412	Q9UBI1	COMMD4	COMMD3	1.78349e-20	1.72831e-11	1	9	2	CCC-Wash (WASH1, FAM21C) complex; CCC complex	15; 13	9; 9	6639; 6645
379	GPN3	-0.843445	-0.843445	0.00222272	0.00616849	-0.987423	-1.49216	5598	2	GPN3_3; GPN3_2	4	51184	Q9UHW5	161	51184	84172	Q9H9Y6	GPN3	POLR1B	2.06594e-14	0.0845077	0.915492	11
380	GPN3	-0.843445	-0.843445	0.00222272	0.00616849	-0.987423	-1.49216	5598	2	GPN3_3; GPN3_2	4	51184	Q9UHW5	161	51184	55703	Q9NW08	GPN3	POLR3B	2.85365e-14	0.00217731	0.997823	11
381	GPN3	-0.843445	-0.843445	0.00222272	0.00616849	-0.987423	-1.49216	5598	2	GPN3_3; GPN3_2	4	51184	Q9UHW5	161	51184	5431	P30876	GPN3	POLR2B	5.73126e-18	0.0753903	0.92461	11
382	GPN3	-0.843445	-0.843445	0.00222272	0.00616849	-0.987423	-1.49216	5598	2	GPN3_3; GPN3_2	4	51184	Q9UHW5	161	51184	9533	O15160	GPN3	POLR1C	4.2885e-25	0.00953397	0.990466	11
383	GPN3	-0.843445	-0.843445	0.00222272	0.00616849	-0.987423	-1.49216	5598	2	GPN3_3; GPN3_2	4	51184	Q9UHW5	161	51184	254102	Q8N3D4	GPN3	EHBP1L1	5.68923e-08	0.00221409	0.997786	11
384	GPN3	-0.843445	-0.843445	0.00222272	0.00616849	-0.987423	-1.49216	5598	2	GPN3_3; GPN3_2	4	51184	Q9UHW5	161	51184	116143	Q96MX6	GPN3	WDR92	5.05549e-08	0.13861	0.86139	11
385	GPN3	-0.843445	-0.843445	0.00222272	0.00616849	-0.987423	-1.49216	5598	2	GPN3_3; GPN3_2	4	51184	Q9UHW5	161	51184	8409	Q9UBK9	GPN3	UXT	0.000205203	0.00123378	0.998561	11
386	GPN3	-0.843445	-0.843445	0.00222272	0.00616849	-0.987423	-1.49216	5598	2	GPN3_3; GPN3_2	4	51184	Q9UHW5	161	51184	51728	Q9Y2Y1	GPN3	POLR3K	2.11846e-12	4.18829e-08	1	11
387	GPN3	-0.843445	-0.843445	0.00222272	0.00616849	-0.987423	-1.49216	5598	2	GPN3_3; GPN3_2	4	51184	Q9UHW5	161	51184	11060	O00308	GPN3	WWP2	3.72939e-11	0.00431738	0.995683	11
388	GPN3	-0.843445	-0.843445	0.00222272	0.00616849	-0.987423	-1.49216	5598	2	GPN3_3; GPN3_2	4	51184	Q9UHW5	161	51184	58490	Q9NQG5	GPN3	RPRD1B	8.29612e-07	0.00511957	0.99488	11
389	GPN3	-0.843445	-0.843445	0.00222272	0.00616849	-0.987423	-1.49216	5598	2	GPN3_3; GPN3_2	4	51184	Q9UHW5	161	51184	5435	P61218	GPN3	POLR2F	2.11181e-11	1.34132e-05	0.999987	11
390	VPS52	-0.841506	-0.841506	0.0061902	0.0123219	-0.977543	-1.47723	15592	2	VPS52_4; VPS52_2	4	6293	Q8N1B4	162	6293	79036	Q9BQD3	VPS52	KXD1	7.86105e-11	0.00281294	0.997187	1	2	EARP complex; GARP complex	4; 4	1; 2	6459; 6463
391	COMMD2	-0.841366	-0.997152	0.00340408	0.00837053	-0.927147	-1.66416	8795	4	COMMD2_4; COMMD2_3; COMMD2_1; COMMD2_2	4	51122	Q86X83	163	51122	23412	Q9UBI1	COMMD2	COMMD3	8.96903e-17	1.42873e-11	1	9	2	CCC-Wash (WASH1, FAM21C) complex; CCC complex	15; 13	9; 9	6639; 6645
392	COMMD2	-0.841366	-0.997152	0.00340408	0.00837053	-0.927147	-1.66416	8795	4	COMMD2_4; COMMD2_3; COMMD2_1; COMMD2_2	4	51122	Q86X83	163	51122	51699	Q9UBQ0	COMMD2	VPS29	1.41314e-20	0.00122617	0.998774	9	2	CCC-Wash (WASH1, FAM21C) complex; CCC complex	15; 13	9; 9	6639; 6645
393	COMMD2	-0.841366	-0.997152	0.00340408	0.00837053	-0.927147	-1.66416	8795	4	COMMD2_4; COMMD2_3; COMMD2_1; COMMD2_2	4	51122	Q86X83	163	51122	57020	Q7Z3J2	COMMD2	C16orf62	8.86435e-11	2.53647e-07	1	9	2	CCC-Wash (WASH1, FAM21C) complex; CCC complex	15; 13	9; 9	6639; 6645
394	COMMD2	-0.841366	-0.997152	0.00340408	0.00837053	-0.927147	-1.66416	8795	4	COMMD2_4; COMMD2_3; COMMD2_1; COMMD2_2	4	51122	Q86X83	163	51122	54520	Q567U6	COMMD2	CCDC93	2.52487e-13	3.12484e-07	1	9	2	CCC-Wash (WASH1, FAM21C) complex; CCC complex	15; 13	9; 9	6639; 6645
395	COMMD2	-0.841366	-0.997152	0.00340408	0.00837053	-0.927147	-1.66416	8795	4	COMMD2_4; COMMD2_3; COMMD2_1; COMMD2_2	4	51122	Q86X83	163	51122	54939	Q9H0A8	COMMD2	COMMD4	3.1537e-23	6.88511e-10	1	9	2	CCC-Wash (WASH1, FAM21C) complex; CCC complex	15; 13	9; 9	6639; 6645
396	COMMD2	-0.841366	-0.997152	0.00340408	0.00837053	-0.927147	-1.66416	8795	4	COMMD2_4; COMMD2_3; COMMD2_1; COMMD2_2	4	51122	Q86X83	163	51122	28952	O60826	COMMD2	CCDC22	1.46138e-23	1.93911e-11	1	9	2	CCC-Wash (WASH1, FAM21C) complex; CCC complex	15; 13	9; 9	6639; 6645
397	COMMD2	-0.841366	-0.997152	0.00340408	0.00837053	-0.927147	-1.66416	8795	4	COMMD2_4; COMMD2_3; COMMD2_1; COMMD2_2	4	51122	Q86X83	163	51122	28991	Q9GZQ3	COMMD2	COMMD5	3.13311e-24	1.29651e-14	1	9	2	CCC-Wash (WASH1, FAM21C) complex; CCC complex	15; 13	9; 9	6639; 6645
398	COMMD2	-0.841366	-0.997152	0.00340408	0.00837053	-0.927147	-1.66416	8795	4	COMMD2_4; COMMD2_3; COMMD2_1; COMMD2_2	4	51122	Q86X83	163	51122	51397	Q9Y6G5	COMMD2	COMMD10	2.19649e-22	4.027e-14	1	9	2	CCC-Wash (WASH1, FAM21C) complex; CCC complex	15; 13	9; 9	6639; 6645
399	COMMD2	-0.841366	-0.997152	0.00340408	0.00837053	-0.927147	-1.66416	8795	4	COMMD2_4; COMMD2_3; COMMD2_1; COMMD2_2	4	51122	Q86X83	163	51122	54951	Q9NX08	COMMD2	COMMD8	1.53933e-19	9.43534e-13	1	9	2	CCC-Wash (WASH1, FAM21C) complex; CCC complex	15; 13	9; 9	6639; 6645
400	VMA21	-0.84125	-0.779426	3.79263e-05	0.000532456	-0.980523	-1.75996	97	4	VMA21_3; VMA21_2; VMA21_1; VMA21_4	4	203547	Q3ZAQ7	164	203547	10159	O75787	VMA21	ATP6AP2	1.79221e-07	4.72097e-05	0.999953	2
401	VMA21	-0.84125	-0.779426	3.79263e-05	0.000532456	-0.980523	-1.75996	97	4	VMA21_3; VMA21_2; VMA21_1; VMA21_4	4	203547	Q3ZAQ7	164	203547	2531	Q06136	VMA21	KDSR	2.74681e-06	0.00161982	0.998377	2
402	TSR1	-0.840996	-0.747377	0.000460763	0.00239062	-0.980708	-1.63499	1173	3	TSR1_2; TSR1_3; TSR1_1	4	55720	Q2NL82	165	55720	6208	P62263	TSR1	RPS14	9.09918e-31	0.0554419	0.944558	4
403	TSR1	-0.840996	-0.747377	0.000460763	0.00239062	-0.980708	-1.63499	1173	3	TSR1_2; TSR1_3; TSR1_1	4	55720	Q2NL82	165	55720	6223	P39019	TSR1	RPS19	3.54415e-32	0.0128264	0.987174	4
404	TSR1	-0.840996	-0.747377	0.000460763	0.00239062	-0.980708	-1.63499	1173	3	TSR1_2; TSR1_3; TSR1_1	4	55720	Q2NL82	165	55720	3921	P08865	TSR1	RPSA	5.87642e-31	0.171014	0.828986	4
405	TSR1	-0.840996	-0.747377	0.000460763	0.00239062	-0.980708	-1.63499	1173	3	TSR1_2; TSR1_3; TSR1_1	4	55720	Q2NL82	165	55720	6426	Q07955	TSR1	SRSF1	3.59654e-13	0.145488	0.854512	4
406	WASF2	-0.840696	-0.871257	0.000724471	0.00310051	-0.954332	-1.71295	1871	4	WASF2_2; WASF2_3; WASF2_4; WASF2_1	4	10163	Q9Y6W5	166	10163	51019	Q9Y3C0	WASF2	CCDC53	4.09634e-09	0.011217	0.988783	2	2	Wave-2 complex; ABI3-WAVE2-CYFIP1 complex	5; 3	3; 2	186; 6991
407	WASF2	-0.840696	-0.871257	0.000724471	0.00310051	-0.954332	-1.71295	1871	4	WASF2_2; WASF2_3; WASF2_4; WASF2_1	4	10163	Q9Y6W5	166	10163	55845	Q8WUW1	WASF2	BRK1	2.51306e-09	3.12985e-07	1	2	2	Wave-2 complex; ABI3-WAVE2-CYFIP1 complex	5; 3	3; 2	186; 6991
408	SAE1	-0.831769	-0.831769	0.00482298	0.0103391	-0.980581	-1.48182	12148	2	SAE1_1; SAE1_4	4	10055	Q9UBE0	169	10055	10054	Q9UBT2	SAE1	UBA2	4.30546e-12	2.16657e-05	0.999978	1	2	SUMO1-SUA1-UBA2 complex; SUA1-UBA2 complex	3; 2	2; 2	5755; 5756
409	ATP6V1F	-0.829546	-0.756759	0.00112797	0.00405841	-0.972162	-1.62075	2873	3	ATP6V1F_2; ATP6V1F_4; ATP6V1F_3	4	9296	Q16864	170	9296	9550	O75348	ATP6V1F	ATP6V1G1	7.57126e-13	0.000102279	0.999898	3
410	ATP6V1F	-0.829546	-0.756759	0.00112797	0.00405841	-0.972162	-1.62075	2873	3	ATP6V1F_2; ATP6V1F_4; ATP6V1F_3	4	9296	Q16864	170	9296	10159	O75787	ATP6V1F	ATP6AP2	7.64854e-14	0.093793	0.906207	3
411	ATP6V1F	-0.829546	-0.756759	0.00112797	0.00405841	-0.972162	-1.62075	2873	3	ATP6V1F_2; ATP6V1F_4; ATP6V1F_3	4	9296	Q16864	170	9296	51382	Q9Y5K8	ATP6V1F	ATP6V1D	6.73233e-16	0.000217979	0.999782	3
412	LOH12CR1	-0.827573	-0.847416	0.000106752	0.000932131	-0.988729	-1.64837	271	3	LOH12CR1_4; LOH12CR1_2; LOH12CR1_3	4	118426	Q969J3	173	118426	389541	Q0VGL1	LOH12CR1	LAMTOR4	1.10469e-12	0.00035342	0.999647	10	1	BORC complex	8	8	7545
413	LOH12CR1	-0.827573	-0.847416	0.000106752	0.000932131	-0.988729	-1.64837	271	3	LOH12CR1_4; LOH12CR1_2; LOH12CR1_3	4	118426	Q969J3	173	118426	119032	Q96B45	LOH12CR1	C10orf32	6.12772e-12	3.79396e-08	1	10	1	BORC complex	8	8	7545
414	LOH12CR1	-0.827573	-0.847416	0.000106752	0.000932131	-0.988729	-1.64837	271	3	LOH12CR1_4; LOH12CR1_2; LOH12CR1_3	4	118426	Q969J3	173	118426	729991	Q96FH0	LOH12CR1	MEF2BNB	2.43666e-13	6.53597e-08	1	10	1	BORC complex	8	8	7545
415	LOH12CR1	-0.827573	-0.847416	0.000106752	0.000932131	-0.988729	-1.64837	271	3	LOH12CR1_4; LOH12CR1_2; LOH12CR1_3	4	118426	Q969J3	173	118426	2647	P78537	LOH12CR1	BLOC1S1	3.9555e-14	4.78474e-07	1	10	1	BORC complex	8	8	7545
416	LOH12CR1	-0.827573	-0.847416	0.000106752	0.000932131	-0.988729	-1.64837	271	3	LOH12CR1_4; LOH12CR1_2; LOH12CR1_3	4	118426	Q969J3	173	118426	8649	Q9UHA4	LOH12CR1	LAMTOR3	2.82267e-09	0.00852068	0.991479	10	1	BORC complex	8	8	7545
417	LOH12CR1	-0.827573	-0.847416	0.000106752	0.000932131	-0.988729	-1.64837	271	3	LOH12CR1_4; LOH12CR1_2; LOH12CR1_3	4	118426	Q969J3	173	118426	55004	Q6IAA8	LOH12CR1	LAMTOR1	2.05765e-13	2.05141e-05	0.999979	10	1	BORC complex	8	8	7545
418	LOH12CR1	-0.827573	-0.847416	0.000106752	0.000932131	-0.988729	-1.64837	271	3	LOH12CR1_4; LOH12CR1_2; LOH12CR1_3	4	118426	Q969J3	173	118426	79036	Q9BQD3	LOH12CR1	KXD1	1.20567e-13	3.6013e-07	1	10	1	BORC complex	8	8	7545
419	LOH12CR1	-0.827573	-0.847416	0.000106752	0.000932131	-0.988729	-1.64837	271	3	LOH12CR1_4; LOH12CR1_2; LOH12CR1_3	4	118426	Q969J3	173	118426	10542	O43504	LOH12CR1	LAMTOR5	1.19359e-12	4.35621e-05	0.999956	10	1	BORC complex	8	8	7545
420	LOH12CR1	-0.827573	-0.847416	0.000106752	0.000932131	-0.988729	-1.64837	271	3	LOH12CR1_4; LOH12CR1_2; LOH12CR1_3	4	118426	Q969J3	173	118426	55845	Q8WUW1	LOH12CR1	BRK1	3.1343e-09	0.00695028	0.99305	10	1	BORC complex	8	8	7545
421	LOH12CR1	-0.827573	-0.847416	0.000106752	0.000932131	-0.988729	-1.64837	271	3	LOH12CR1_4; LOH12CR1_2; LOH12CR1_3	4	118426	Q969J3	173	118426	54785	Q96GS4	LOH12CR1	C17orf59	1.2761e-14	1.49287e-06	0.999999	10	1	BORC complex	8	8	7545
422	TFPT	-0.821591	-0.813472	0.00208835	0.00588683	-0.964525	-1.60801	5320	3	TFPT_2; TFPT_3; TFPT_1	4	29844	P0C1Z6	176	29844	54617	Q9ULG1	TFPT	INO80	3.46498e-19	1.05312e-09	1	10
423	TFPT	-0.821591	-0.813472	0.00208835	0.00588683	-0.964525	-1.60801	5320	3	TFPT_2; TFPT_3; TFPT_1	4	29844	P0C1Z6	176	29844	4798	Q6P4R8	TFPT	NFRKB	3.32328e-11	1.0442e-06	0.999999	10
424	TFPT	-0.821591	-0.813472	0.00208835	0.00588683	-0.964525	-1.60801	5320	3	TFPT_2; TFPT_3; TFPT_1	4	29844	P0C1Z6	176	29844	93973	Q9H981	TFPT	ACTR8	2.88796e-08	1.37772e-05	0.999986	10
425	TFPT	-0.821591	-0.813472	0.00208835	0.00588683	-0.964525	-1.60801	5320	3	TFPT_2; TFPT_3; TFPT_1	4	29844	P0C1Z6	176	29844	5518	P30153	TFPT	PPP2R1A	3.32237e-14	0.0784747	0.921525	10
426	TFPT	-0.821591	-0.813472	0.00208835	0.00588683	-0.964525	-1.60801	5320	3	TFPT_2; TFPT_3; TFPT_1	4	29844	P0C1Z6	176	29844	5520	P63151	TFPT	PPP2R2A	1.67203e-15	0.193565	0.806435	10
427	TFPT	-0.821591	-0.813472	0.00208835	0.00588683	-0.964525	-1.60801	5320	3	TFPT_2; TFPT_3; TFPT_1	4	29844	P0C1Z6	176	29844	112869	Q96ES7	TFPT	CCDC101	5.83033e-19	6.70683e-05	0.999933	10
428	TFPT	-0.821591	-0.813472	0.00208835	0.00588683	-0.964525	-1.60801	5320	3	TFPT_2; TFPT_3; TFPT_1	4	29844	P0C1Z6	176	29844	7528	P25490	TFPT	YY1	3.66645e-08	0.177644	0.822356	10
429	TFPT	-0.821591	-0.813472	0.00208835	0.00588683	-0.964525	-1.60801	5320	3	TFPT_2; TFPT_3; TFPT_1	4	29844	P0C1Z6	176	29844	83444	Q9C086	TFPT	INO80B	4.47677e-07	1.75439e-05	0.999982	10
430	TFPT	-0.821591	-0.813472	0.00208835	0.00588683	-0.964525	-1.60801	5320	3	TFPT_2; TFPT_3; TFPT_1	4	29844	P0C1Z6	176	29844	9342	O95721	TFPT	SNAP29	1.18081e-12	0.00619831	0.993802	10
431	TFPT	-0.821591	-0.813472	0.00208835	0.00588683	-0.964525	-1.60801	5320	3	TFPT_2; TFPT_3; TFPT_1	4	29844	P0C1Z6	176	29844	54891	Q53TQ3	TFPT	INO80D	0.0230907	6.60373e-09	0.976909	10
432	PDPK1	-0.815198	-0.680197	0.000421123	0.00224549	-0.981517	-1.63634	1072	3	PDPK1_3; PDPK1_4; PDPK1_2	4	5170	O15530	178	5170	3312	P11142	PDPK1	HSPA8	8.01181e-19	5.36962e-05	0.999946	2
433	PDPK1	-0.815198	-0.680197	0.000421123	0.00224549	-0.981517	-1.63634	1072	3	PDPK1_3; PDPK1_4; PDPK1_2	4	5170	O15530	178	5170	5929	Q15291	PDPK1	RBBP5	2.84715e-18	1.83749e-07	1	2
434	RPS14	-0.813187	-0.813187	0.00284162	0.00732648	-0.985606	-1.48941	7157	2	RPS14_1; RPS14_2	4	6208	P62263	179	6208	65095	Q8N9T8	RPS14	KRI1	2.29385e-11	0.0226286	0.977371	10	3	Ribosome, cytoplasmic; 40S ribosomal subunit, cytoplasmic; Nop56p-associated pre-rRNA complex	81; 31; 105	4; 3; 6	306; 338; 3055
435	RPS14	-0.813187	-0.813187	0.00284162	0.00732648	-0.985606	-1.48941	7157	2	RPS14_1; RPS14_2	4	6208	P62263	179	6208	11103	Q13601	RPS14	KRR1	1.4143e-27	0.000857743	0.999142	10	3	Ribosome, cytoplasmic; 40S ribosomal subunit, cytoplasmic; Nop56p-associated pre-rRNA complex	81; 31; 105	4; 3; 6	306; 338; 3055
436	RPS14	-0.813187	-0.813187	0.00284162	0.00732648	-0.985606	-1.48941	7157	2	RPS14_1; RPS14_2	4	6208	P62263	179	6208	79050	Q9BVI4	RPS14	NOC4L	1.54025e-10	0.0298677	0.970132	10	3	Ribosome, cytoplasmic; 40S ribosomal subunit, cytoplasmic; Nop56p-associated pre-rRNA complex	81; 31; 105	4; 3; 6	306; 338; 3055
437	RPS14	-0.813187	-0.813187	0.00284162	0.00732648	-0.985606	-1.48941	7157	2	RPS14_1; RPS14_2	4	6208	P62263	179	6208	4931	O15381	RPS14	NVL	2.19765e-29	0.207933	0.792067	10	3	Ribosome, cytoplasmic; 40S ribosomal subunit, cytoplasmic; Nop56p-associated pre-rRNA complex	81; 31; 105	4; 3; 6	306; 338; 3055
438	RPS14	-0.813187	-0.813187	0.00284162	0.00732648	-0.985606	-1.48941	7157	2	RPS14_1; RPS14_2	4	6208	P62263	179	6208	4820	P30414	RPS14	NKTR	2.25989e-07	0.0868776	0.913122	10	3	Ribosome, cytoplasmic; 40S ribosomal subunit, cytoplasmic; Nop56p-associated pre-rRNA complex	81; 31; 105	4; 3; 6	306; 338; 3055
439	RPS14	-0.813187	-0.813187	0.00284162	0.00732648	-0.985606	-1.48941	7157	2	RPS14_1; RPS14_2	4	6208	P62263	179	6208	115294	Q96MG8	RPS14	PCMTD1	0.00238878	0.0169174	0.980694	10	3	Ribosome, cytoplasmic; 40S ribosomal subunit, cytoplasmic; Nop56p-associated pre-rRNA complex	81; 31; 105	4; 3; 6	306; 338; 3055
440	RPS14	-0.813187	-0.813187	0.00284162	0.00732648	-0.985606	-1.48941	7157	2	RPS14_1; RPS14_2	4	6208	P62263	179	6208	6223	P39019	RPS14	RPS19	8.1443e-34	0.0360531	0.963947	10	3	Ribosome, cytoplasmic; 40S ribosomal subunit, cytoplasmic; Nop56p-associated pre-rRNA complex	81; 31; 105	4; 3; 6	306; 338; 3055
441	RPS14	-0.813187	-0.813187	0.00284162	0.00732648	-0.985606	-1.48941	7157	2	RPS14_1; RPS14_2	4	6208	P62263	179	6208	9013	Q15572	RPS14	TAF1C	2.54564e-24	0.0114575	0.988543	10	3	Ribosome, cytoplasmic; 40S ribosomal subunit, cytoplasmic; Nop56p-associated pre-rRNA complex	81; 31; 105	4; 3; 6	306; 338; 3055
442	RPS14	-0.813187	-0.813187	0.00284162	0.00732648	-0.985606	-1.48941	7157	2	RPS14_1; RPS14_2	4	6208	P62263	179	6208	55720	Q2NL82	RPS14	TSR1	9.09918e-31	0.0554419	0.944558	10	3	Ribosome, cytoplasmic; 40S ribosomal subunit, cytoplasmic; Nop56p-associated pre-rRNA complex	81; 31; 105	4; 3; 6	306; 338; 3055
443	RPS14	-0.813187	-0.813187	0.00284162	0.00732648	-0.985606	-1.48941	7157	2	RPS14_1; RPS14_2	4	6208	P62263	179	6208	9045	P50914	RPS14	RPL14	6.03116e-25	0.148664	0.851336	10	3	Ribosome, cytoplasmic; 40S ribosomal subunit, cytoplasmic; Nop56p-associated pre-rRNA complex	81; 31; 105	4; 3; 6	306; 338; 3055
444	EIF2B1	-0.811515	-0.811515	0.00237556	0.00645068	-0.986969	-1.49147	5983	2	EIF2B1_3; EIF2B1_1	4	1967	Q14232	180	1967	7095	Q99442	EIF2B1	SEC62	4.03143e-11	6.42632e-05	0.999936	2	1	EIF2B1-EIF2B2-EIF2B3-EIF2B4-EIF2B5 complex	5	1	7292
445	EIF2B1	-0.811515	-0.811515	0.00237556	0.00645068	-0.986969	-1.49147	5983	2	EIF2B1_3; EIF2B1_1	4	1967	Q14232	180	1967	55529	Q8N4L2	EIF2B1	TMEM55A	2.47194e-11	0.191197	0.808803	2	1	EIF2B1-EIF2B2-EIF2B3-EIF2B4-EIF2B5 complex	5	1	7292
446	WDR7	-0.809129	-0.83833	0.000104878	0.000927069	-0.97432	-1.74883	270	4	WDR7_1; WDR7_2; WDR7_3; WDR7_4	4	23335	Q9Y4E6	181	23335	9550	O75348	WDR7	ATP6V1G1	1.77414e-09	1.60447e-05	0.999984	1
447	SPATA5	-0.807489	-0.807489	0.00238747	0.00645068	-0.986926	-1.49141	6013	2	SPATA5_1; SPATA5_2	4	166378	Q8NB90	182	166378	51550	Q9BW66	SPATA5	CINP	1.51676e-11	0.000704153	0.999296	2
448	SPATA5	-0.807489	-0.807489	0.00238747	0.00645068	-0.986926	-1.49141	6013	2	SPATA5_1; SPATA5_2	4	166378	Q8NB90	182	166378	79029	Q9BVQ7	SPATA5	SPATA5L1	2.64928e-11	0.0368733	0.963127	2
449	DHX33	-0.805133	-0.805133	0.00940578	0.0161413	-0.971396	-1.46794	23692	2	DHX33_4; DHX33_3	4	56919	Q9H6R0	184	56919	51728	Q9Y2Y1	DHX33	POLR3K	1.23502e-11	0.206025	0.793975	1
450	RBBP5	-0.80282	-0.784541	0.000423382	0.00224549	-0.961188	-1.72526	1093	4	RBBP5_1; RBBP5_3; RBBP5_4; RBBP5_2	4	5929	Q15291	186	5929	58508	Q8NEZ4	RBBP5	KMT2C	3.1168e-10	5.7919e-08	1	9	21	Menin-associated histone methyltransferase complex; MLL-HCF complex; ALL-1 supercomplex; ASCOM complex; Set1B complex; Set1A complex; UTX-MLL2/3 complex; PTIP-HMT complex; MLL1-WDR5 complex; MLL1 core complex; MLL2 complex; MLL3 complex; MLL1 complex; MLL4 complex; Set1A complex; Set1B complex; CUL4A-DDB1-RBBP5 complex; NIF1-ASH2L-RBBP5-WDR5 complex; WRAD complex (WDR5, RBBP5, ASH2L, DPY30); WRA …	7; 7; 28; 7; 18; 16; 12; 10; 27; 4; 10; 9; 8; 9; 16; 18; 3; 4; 4; 3; 4	4; 2; 6; 3; 9; 7; 4; 6; 5; 2; 3; 6; 3; 5; 7; 9; 1; 2; 3; 2; 2	1254; 1256; 1257; 1400; 2730; 2731; 3075; 5195; 5386; 6457; 6460; 6461; 6462; 6467; 6469; 6470; 6491; 6845; 6849; 6850; 7367
451	RBBP5	-0.80282	-0.784541	0.000423382	0.00224549	-0.961188	-1.72526	1093	4	RBBP5_1; RBBP5_3; RBBP5_4; RBBP5_2	4	5929	Q15291	186	5929	23067	Q9UPS6	RBBP5	SETD1B	5.28856e-08	6.62007e-08	1	9	21	Menin-associated histone methyltransferase complex; MLL-HCF complex; ALL-1 supercomplex; ASCOM complex; Set1B complex; Set1A complex; UTX-MLL2/3 complex; PTIP-HMT complex; MLL1-WDR5 complex; MLL1 core complex; MLL2 complex; MLL3 complex; MLL1 complex; MLL4 complex; Set1A complex; Set1B complex; CUL4A-DDB1-RBBP5 complex; NIF1-ASH2L-RBBP5-WDR5 complex; WRAD complex (WDR5, RBBP5, ASH2L, DPY30); WRA …	7; 7; 28; 7; 18; 16; 12; 10; 27; 4; 10; 9; 8; 9; 16; 18; 3; 4; 4; 3; 4	4; 2; 6; 3; 9; 7; 4; 6; 5; 2; 3; 6; 3; 5; 7; 9; 1; 2; 3; 2; 2	1254; 1256; 1257; 1400; 2730; 2731; 3075; 5195; 5386; 6457; 6460; 6461; 6462; 6467; 6469; 6470; 6491; 6845; 6849; 6850; 7367
452	RBBP5	-0.80282	-0.784541	0.000423382	0.00224549	-0.961188	-1.72526	1093	4	RBBP5_1; RBBP5_3; RBBP5_4; RBBP5_2	4	5929	Q15291	186	5929	9070	Q9UBL3	RBBP5	ASH2L	2.15825e-30	1.61902e-07	1	9	21	Menin-associated histone methyltransferase complex; MLL-HCF complex; ALL-1 supercomplex; ASCOM complex; Set1B complex; Set1A complex; UTX-MLL2/3 complex; PTIP-HMT complex; MLL1-WDR5 complex; MLL1 core complex; MLL2 complex; MLL3 complex; MLL1 complex; MLL4 complex; Set1A complex; Set1B complex; CUL4A-DDB1-RBBP5 complex; NIF1-ASH2L-RBBP5-WDR5 complex; WRAD complex (WDR5, RBBP5, ASH2L, DPY30); WRA …	7; 7; 28; 7; 18; 16; 12; 10; 27; 4; 10; 9; 8; 9; 16; 18; 3; 4; 4; 3; 4	4; 2; 6; 3; 9; 7; 4; 6; 5; 2; 3; 6; 3; 5; 7; 9; 1; 2; 3; 2; 2	1254; 1256; 1257; 1400; 2730; 2731; 3075; 5195; 5386; 6457; 6460; 6461; 6462; 6467; 6469; 6470; 6491; 6845; 6849; 6850; 7367
453	RBBP5	-0.80282	-0.784541	0.000423382	0.00224549	-0.961188	-1.72526	1093	4	RBBP5_1; RBBP5_3; RBBP5_4; RBBP5_2	4	5929	Q15291	186	5929	79726	Q6PJI9	RBBP5	WDR59	3.36681e-09	0.177412	0.822588	9	21	Menin-associated histone methyltransferase complex; MLL-HCF complex; ALL-1 supercomplex; ASCOM complex; Set1B complex; Set1A complex; UTX-MLL2/3 complex; PTIP-HMT complex; MLL1-WDR5 complex; MLL1 core complex; MLL2 complex; MLL3 complex; MLL1 complex; MLL4 complex; Set1A complex; Set1B complex; CUL4A-DDB1-RBBP5 complex; NIF1-ASH2L-RBBP5-WDR5 complex; WRAD complex (WDR5, RBBP5, ASH2L, DPY30); WRA …	7; 7; 28; 7; 18; 16; 12; 10; 27; 4; 10; 9; 8; 9; 16; 18; 3; 4; 4; 3; 4	4; 2; 6; 3; 9; 7; 4; 6; 5; 2; 3; 6; 3; 5; 7; 9; 1; 2; 3; 2; 2	1254; 1256; 1257; 1400; 2730; 2731; 3075; 5195; 5386; 6457; 6460; 6461; 6462; 6467; 6469; 6470; 6491; 6845; 6849; 6850; 7367
454	RBBP5	-0.80282	-0.784541	0.000423382	0.00224549	-0.961188	-1.72526	1093	4	RBBP5_1; RBBP5_3; RBBP5_4; RBBP5_2	4	5929	Q15291	186	5929	54468	Q9NXC5	RBBP5	MIOS	3.01608e-12	3.39704e-05	0.999966	9	21	Menin-associated histone methyltransferase complex; MLL-HCF complex; ALL-1 supercomplex; ASCOM complex; Set1B complex; Set1A complex; UTX-MLL2/3 complex; PTIP-HMT complex; MLL1-WDR5 complex; MLL1 core complex; MLL2 complex; MLL3 complex; MLL1 complex; MLL4 complex; Set1A complex; Set1B complex; CUL4A-DDB1-RBBP5 complex; NIF1-ASH2L-RBBP5-WDR5 complex; WRAD complex (WDR5, RBBP5, ASH2L, DPY30); WRA …	7; 7; 28; 7; 18; 16; 12; 10; 27; 4; 10; 9; 8; 9; 16; 18; 3; 4; 4; 3; 4	4; 2; 6; 3; 9; 7; 4; 6; 5; 2; 3; 6; 3; 5; 7; 9; 1; 2; 3; 2; 2	1254; 1256; 1257; 1400; 2730; 2731; 3075; 5195; 5386; 6457; 6460; 6461; 6462; 6467; 6469; 6470; 6491; 6845; 6849; 6850; 7367
455	RBBP5	-0.80282	-0.784541	0.000423382	0.00224549	-0.961188	-1.72526	1093	4	RBBP5_1; RBBP5_3; RBBP5_4; RBBP5_2	4	5929	Q15291	186	5929	84219	Q96S15	RBBP5	WDR24	6.92814e-09	1.84631e-06	0.999998	9	21	Menin-associated histone methyltransferase complex; MLL-HCF complex; ALL-1 supercomplex; ASCOM complex; Set1B complex; Set1A complex; UTX-MLL2/3 complex; PTIP-HMT complex; MLL1-WDR5 complex; MLL1 core complex; MLL2 complex; MLL3 complex; MLL1 complex; MLL4 complex; Set1A complex; Set1B complex; CUL4A-DDB1-RBBP5 complex; NIF1-ASH2L-RBBP5-WDR5 complex; WRAD complex (WDR5, RBBP5, ASH2L, DPY30); WRA …	7; 7; 28; 7; 18; 16; 12; 10; 27; 4; 10; 9; 8; 9; 16; 18; 3; 4; 4; 3; 4	4; 2; 6; 3; 9; 7; 4; 6; 5; 2; 3; 6; 3; 5; 7; 9; 1; 2; 3; 2; 2	1254; 1256; 1257; 1400; 2730; 2731; 3075; 5195; 5386; 6457; 6460; 6461; 6462; 6467; 6469; 6470; 6491; 6845; 6849; 6850; 7367
456	RBBP5	-0.80282	-0.784541	0.000423382	0.00224549	-0.961188	-1.72526	1093	4	RBBP5_1; RBBP5_3; RBBP5_4; RBBP5_2	4	5929	Q15291	186	5929	22976	Q6ZW49	RBBP5	PAXIP1	1.91075e-09	3.20013e-07	1	9	21	Menin-associated histone methyltransferase complex; MLL-HCF complex; ALL-1 supercomplex; ASCOM complex; Set1B complex; Set1A complex; UTX-MLL2/3 complex; PTIP-HMT complex; MLL1-WDR5 complex; MLL1 core complex; MLL2 complex; MLL3 complex; MLL1 complex; MLL4 complex; Set1A complex; Set1B complex; CUL4A-DDB1-RBBP5 complex; NIF1-ASH2L-RBBP5-WDR5 complex; WRAD complex (WDR5, RBBP5, ASH2L, DPY30); WRA …	7; 7; 28; 7; 18; 16; 12; 10; 27; 4; 10; 9; 8; 9; 16; 18; 3; 4; 4; 3; 4	4; 2; 6; 3; 9; 7; 4; 6; 5; 2; 3; 6; 3; 5; 7; 9; 1; 2; 3; 2; 2	1254; 1256; 1257; 1400; 2730; 2731; 3075; 5195; 5386; 6457; 6460; 6461; 6462; 6467; 6469; 6470; 6491; 6845; 6849; 6850; 7367
457	RBBP5	-0.80282	-0.784541	0.000423382	0.00224549	-0.961188	-1.72526	1093	4	RBBP5_1; RBBP5_3; RBBP5_4; RBBP5_2	4	5929	Q15291	186	5929	30827	Q9P0U4	RBBP5	CXXC1	1.63e-10	3.90209e-09	1	9	21	Menin-associated histone methyltransferase complex; MLL-HCF complex; ALL-1 supercomplex; ASCOM complex; Set1B complex; Set1A complex; UTX-MLL2/3 complex; PTIP-HMT complex; MLL1-WDR5 complex; MLL1 core complex; MLL2 complex; MLL3 complex; MLL1 complex; MLL4 complex; Set1A complex; Set1B complex; CUL4A-DDB1-RBBP5 complex; NIF1-ASH2L-RBBP5-WDR5 complex; WRAD complex (WDR5, RBBP5, ASH2L, DPY30); WRA …	7; 7; 28; 7; 18; 16; 12; 10; 27; 4; 10; 9; 8; 9; 16; 18; 3; 4; 4; 3; 4	4; 2; 6; 3; 9; 7; 4; 6; 5; 2; 3; 6; 3; 5; 7; 9; 1; 2; 3; 2; 2	1254; 1256; 1257; 1400; 2730; 2731; 3075; 5195; 5386; 6457; 6460; 6461; 6462; 6467; 6469; 6470; 6491; 6845; 6849; 6850; 7367
458	RBBP5	-0.80282	-0.784541	0.000423382	0.00224549	-0.961188	-1.72526	1093	4	RBBP5_1; RBBP5_3; RBBP5_4; RBBP5_2	4	5929	Q15291	186	5929	5170	O15530	RBBP5	PDPK1	2.84715e-18	1.83749e-07	1	9	21	Menin-associated histone methyltransferase complex; MLL-HCF complex; ALL-1 supercomplex; ASCOM complex; Set1B complex; Set1A complex; UTX-MLL2/3 complex; PTIP-HMT complex; MLL1-WDR5 complex; MLL1 core complex; MLL2 complex; MLL3 complex; MLL1 complex; MLL4 complex; Set1A complex; Set1B complex; CUL4A-DDB1-RBBP5 complex; NIF1-ASH2L-RBBP5-WDR5 complex; WRAD complex (WDR5, RBBP5, ASH2L, DPY30); WRA …	7; 7; 28; 7; 18; 16; 12; 10; 27; 4; 10; 9; 8; 9; 16; 18; 3; 4; 4; 3; 4	4; 2; 6; 3; 9; 7; 4; 6; 5; 2; 3; 6; 3; 5; 7; 9; 1; 2; 3; 2; 2	1254; 1256; 1257; 1400; 2730; 2731; 3075; 5195; 5386; 6457; 6460; 6461; 6462; 6467; 6469; 6470; 6491; 6845; 6849; 6850; 7367
459	DDX10	-0.802801	-0.802801	0.0223956	0.0284312	-0.952743	-1.43975	56413	2	DDX10_2; DDX10_4	4	1662	Q13206	187	1662	3609	Q12906	DDX10	ILF3	4.3206e-09	0.176466	0.823534	8
460	DDX10	-0.802801	-0.802801	0.0223956	0.0284312	-0.952743	-1.43975	56413	2	DDX10_2; DDX10_4	4	1662	Q13206	187	1662	6223	P39019	DDX10	RPS19	1.10637e-11	0.0442956	0.955704	8
461	DDX10	-0.802801	-0.802801	0.0223956	0.0284312	-0.952743	-1.43975	56413	2	DDX10_2; DDX10_4	4	1662	Q13206	187	1662	6727	P37108	DDX10	SRP14	2.78461e-12	0.101293	0.898707	8
462	DDX10	-0.802801	-0.802801	0.0223956	0.0284312	-0.952743	-1.43975	56413	2	DDX10_2; DDX10_4	4	1662	Q13206	187	1662	9045	P50914	DDX10	RPL14	7.21977e-13	0.00882931	0.991171	8
463	DDX10	-0.802801	-0.802801	0.0223956	0.0284312	-0.952743	-1.43975	56413	2	DDX10_2; DDX10_4	4	1662	Q13206	187	1662	6426	Q07955	DDX10	SRSF1	6.87068e-13	0.0150031	0.984997	8
464	DDX10	-0.802801	-0.802801	0.0223956	0.0284312	-0.952743	-1.43975	56413	2	DDX10_2; DDX10_4	4	1662	Q13206	187	1662	3921	P08865	DDX10	RPSA	2.53504e-11	0.193142	0.806858	8
465	DDX10	-0.802801	-0.802801	0.0223956	0.0284312	-0.952743	-1.43975	56413	2	DDX10_2; DDX10_4	4	1662	Q13206	187	1662	11103	Q13601	DDX10	KRR1	5.05091e-09	0.0710407	0.928959	8
466	DDX10	-0.802801	-0.802801	0.0223956	0.0284312	-0.952743	-1.43975	56413	2	DDX10_2; DDX10_4	4	1662	Q13206	187	1662	23144	Q8IXZ2	DDX10	ZC3H3	1.3511e-09	0.142048	0.857952	8
467	NFRKB	-0.797502	-0.797502	0.00200795	0.00575078	-0.988118	-1.49321	5057	2	NFRKB_1; NFRKB_2	4	4798	Q6P4R8	188	4798	29844	P0C1Z6	NFRKB	TFPT	3.32328e-11	1.0442e-06	0.999999	2	1	INO80 chromatin remodeling complex	13	5	302
468	NFRKB	-0.797502	-0.797502	0.00200795	0.00575078	-0.988118	-1.49321	5057	2	NFRKB_1; NFRKB_2	4	4798	Q6P4R8	188	4798	54617	Q9ULG1	NFRKB	INO80	4.79755e-11	1.30253e-06	0.999999	2	1	INO80 chromatin remodeling complex	13	5	302
469	TLN1	-0.795411	-0.795411	0.00238231	0.00645068	-0.98694	-1.49143	6000	2	TLN1_4; TLN1_2	4	7094	Q9Y490	190	7094	29956	Q96G23	TLN1	CERS2	2.24584e-12	0.108333	0.891667	3	3	ITGA2b-ITGB3-TLN1 complex; Polycystin-1 multiprotein complex (ACTN1, CDH1, SRC, JUP, VCL, CTNNB1, PXN, BCAR1, PKD1, PTK2, TLN1); THSD1-FAK-talin-vinculin complex	3; 11; 4	1; 1; 1	2378; 5177; 6990
470	TLN1	-0.795411	-0.795411	0.00238231	0.00645068	-0.98694	-1.49143	6000	2	TLN1_4; TLN1_2	4	7094	Q9Y490	190	7094	3312	P11142	TLN1	HSPA8	1.70389e-10	0.159668	0.840332	3	3	ITGA2b-ITGB3-TLN1 complex; Polycystin-1 multiprotein complex (ACTN1, CDH1, SRC, JUP, VCL, CTNNB1, PXN, BCAR1, PKD1, PTK2, TLN1); THSD1-FAK-talin-vinculin complex	3; 11; 4	1; 1; 1	2378; 5177; 6990
471	TLN1	-0.795411	-0.795411	0.00238231	0.00645068	-0.98694	-1.49143	6000	2	TLN1_4; TLN1_2	4	7094	Q9Y490	190	7094	2968	Q92759	TLN1	GTF2H4	8.84039e-09	0.0900585	0.909941	3	3	ITGA2b-ITGB3-TLN1 complex; Polycystin-1 multiprotein complex (ACTN1, CDH1, SRC, JUP, VCL, CTNNB1, PXN, BCAR1, PKD1, PTK2, TLN1); THSD1-FAK-talin-vinculin complex	3; 11; 4	1; 1; 1	2378; 5177; 6990
472	RPP30	-0.79349	-0.792655	2.97993e-05	0.000444506	-0.981602	-1.7619	76	4	RPP30_3; RPP30_2; RPP30_4; RPP30_1	4	10556	P78346	192	10556	10557	P78345	RPP30	RPP38	8.68588e-13	2.26893e-05	0.999977	5	1	Rnase/Mrp complex	10	5	123
473	RPP30	-0.79349	-0.792655	2.97993e-05	0.000444506	-0.981602	-1.7619	76	4	RPP30_3; RPP30_2; RPP30_4; RPP30_1	4	10556	P78346	192	10556	25871	Q6NW34	RPP30	C3orf17	1.75912e-25	9.22974e-06	0.999991	5	1	Rnase/Mrp complex	10	5	123
474	RPP30	-0.79349	-0.792655	2.97993e-05	0.000444506	-0.981602	-1.7619	76	4	RPP30_3; RPP30_2; RPP30_4; RPP30_1	4	10556	P78346	192	10556	11102	O95059	RPP30	RPP14	7.04366e-22	9.25498e-09	1	5	1	Rnase/Mrp complex	10	5	123
475	RPP30	-0.79349	-0.792655	2.97993e-05	0.000444506	-0.981602	-1.7619	76	4	RPP30_3; RPP30_2; RPP30_4; RPP30_1	4	10556	P78346	192	10556	10248	O75817	RPP30	POP7	2.51041e-23	0.00014877	0.999851	5	1	Rnase/Mrp complex	10	5	123
476	RPP30	-0.79349	-0.792655	2.97993e-05	0.000444506	-0.981602	-1.7619	76	4	RPP30_3; RPP30_2; RPP30_4; RPP30_1	4	10556	P78346	192	10556	51367	Q969H6	RPP30	POP5	1.64153e-18	9.72045e-06	0.99999	5	1	Rnase/Mrp complex	10	5	123
477	SRP9	-0.793046	-0.793046	0.00816401	0.0147729	-0.973639	-1.47133	20564	2	SRP9_2; SRP9_3	4	6726	P49458	193	6726	6727	P37108	SRP9	SRP14	3.0924e-24	5.66633e-07	0.999999	2
478	SRP9	-0.793046	-0.793046	0.00816401	0.0147729	-0.973639	-1.47133	20564	2	SRP9_2; SRP9_3	4	6726	P49458	193	6726	51605	Q9UJA5	SRP9	TRMT6	9.20075e-10	0.0195706	0.980429	2
479	NELFB	-0.790289	-0.863967	0.000765321	0.00322335	-0.976307	-1.62766	1949	3	NELFB_3; NELFB_2; NELFB_4	4	25920	Q8WX92	194	25920	7936	P18615	NELFB	NELFE	7.34745e-12	9.78188e-09	1	4	1	NELF complex (Negative elongation factor complex)	4	4	2598
480	NELFB	-0.790289	-0.863967	0.000765321	0.00322335	-0.976307	-1.62766	1949	3	NELFB_3; NELFB_2; NELFB_4	4	25920	Q8WX92	194	25920	7469	Q9H3P2	NELFB	NELFA	2.56344e-12	3.03034e-08	1	4	1	NELF complex (Negative elongation factor complex)	4	4	2598
481	NELFB	-0.790289	-0.863967	0.000765321	0.00322335	-0.976307	-1.62766	1949	3	NELFB_3; NELFB_2; NELFB_4	4	25920	Q8WX92	194	25920	2235	P22830	NELFB	FECH	5.15683e-11	1.36212e-05	0.999986	4	1	NELF complex (Negative elongation factor complex)	4	4	2598
482	NELFB	-0.790289	-0.863967	0.000765321	0.00322335	-0.976307	-1.62766	1949	3	NELFB_3; NELFB_2; NELFB_4	4	25920	Q8WX92	194	25920	51497	Q8IXH7	NELFB	NELFCD	4.52133e-12	1.37346e-08	1	4	1	NELF complex (Negative elongation factor complex)	4	4	2598
483	INO80B	-0.787688	-0.93814	0.00379482	0.00887646	-0.954943	-1.59204	9668	3	INO80B_3; INO80B_4; INO80B_2	4	83444	Q9C086	195	83444	29844	P0C1Z6	INO80B	TFPT	4.47677e-07	1.75439e-05	0.999982	2	1	INO80 chromatin remodeling complex	13	5	302
484	INO80B	-0.787688	-0.93814	0.00379482	0.00887646	-0.954943	-1.59204	9668	3	INO80B_3; INO80B_4; INO80B_2	4	83444	Q9C086	195	83444	54617	Q9ULG1	INO80B	INO80	3.28389e-11	2.61831e-08	1	2	1	INO80 chromatin remodeling complex	13	5	302
485	INO80D	-0.786241	-0.865662	0.000835181	0.00337054	-0.975385	-1.62612	2127	3	INO80D_3; INO80D_4; INO80D_1	4	54891	Q53TQ3	196	54891	29844	P0C1Z6	INO80D	TFPT	0.0230907	6.60373e-09	0.976909	2	1	INO80 chromatin remodeling complex	13	5	302
486	INO80D	-0.786241	-0.865662	0.000835181	0.00337054	-0.975385	-1.62612	2127	3	INO80D_3; INO80D_4; INO80D_1	4	54891	Q53TQ3	196	54891	54617	Q9ULG1	INO80D	INO80	4.71893e-09	2.70643e-06	0.999997	2	1	INO80 chromatin remodeling complex	13	5	302
487	TRIM28	-0.785863	-0.827548	5.95985e-05	0.000688267	-0.978153	-1.75571	153	4	TRIM28_3; TRIM28_2; TRIM28_4; TRIM28_1	4	10155	Q13263	197	10155	51592	Q9UPN9	TRIM28	TRIM33	1.22213e-07	0.00500517	0.994995	2	4	NCOR1 complex; Emerin complex 32; ZNF304-corepressor complex; FOXP3-TRIM28-ZFP90 complex	10; 22; 4; 3	4; 6; 1; 1	1413; 5614; 6345; 6931
488	TRIM28	-0.785863	-0.827548	5.95985e-05	0.000688267	-0.978153	-1.75571	153	4	TRIM28_3; TRIM28_2; TRIM28_4; TRIM28_1	4	10155	Q13263	197	10155	84911	Q96SR6	TRIM28	ZNF382	6.54293e-19	0.225458	0.774542	2	4	NCOR1 complex; Emerin complex 32; ZNF304-corepressor complex; FOXP3-TRIM28-ZFP90 complex	10; 22; 4; 3	4; 6; 1; 1	1413; 5614; 6345; 6931
489	ILF3	-0.783728	-0.754569	0.000240586	0.00156936	-0.984896	-1.64198	612	3	ILF3_1; ILF3_3; ILF3_2	4	3609	Q12906	198	3609	1662	Q13206	ILF3	DDX10	4.3206e-09	0.176466	0.823534	5	7	Large Drosha complex; Nop56p-associated pre-rRNA complex; DGCR8-ILF3 complex; ILF3-XPO5 complex; DGCR8 multiprotein complex; DNA-PK-Ku-eIF2-NF90-NF45 complex; Emerin complex 52	20; 105; 2; 2; 11; 8; 23	2; 6; 1; 1; 1; 4; 1	1332; 3055; 3079; 3080; 3082; 5183; 5615
490	ILF3	-0.783728	-0.754569	0.000240586	0.00156936	-0.984896	-1.64198	612	3	ILF3_1; ILF3_3; ILF3_2	4	3609	Q12906	198	3609	4931	O15381	ILF3	NVL	2.43774e-12	0.0549201	0.94508	5	7	Large Drosha complex; Nop56p-associated pre-rRNA complex; DGCR8-ILF3 complex; ILF3-XPO5 complex; DGCR8 multiprotein complex; DNA-PK-Ku-eIF2-NF90-NF45 complex; Emerin complex 52	20; 105; 2; 2; 11; 8; 23	2; 6; 1; 1; 1; 4; 1	1332; 3055; 3079; 3080; 3082; 5183; 5615
491	ILF3	-0.783728	-0.754569	0.000240586	0.00156936	-0.984896	-1.64198	612	3	ILF3_1; ILF3_3; ILF3_2	4	3609	Q12906	198	3609	3608	Q12905	ILF3	ILF2	2.41981e-22	5.56158e-07	0.999999	5	7	Large Drosha complex; Nop56p-associated pre-rRNA complex; DGCR8-ILF3 complex; ILF3-XPO5 complex; DGCR8 multiprotein complex; DNA-PK-Ku-eIF2-NF90-NF45 complex; Emerin complex 52	20; 105; 2; 2; 11; 8; 23	2; 6; 1; 1; 1; 4; 1	1332; 3055; 3079; 3080; 3082; 5183; 5615
492	ILF3	-0.783728	-0.754569	0.000240586	0.00156936	-0.984896	-1.64198	612	3	ILF3_1; ILF3_3; ILF3_2	4	3609	Q12906	198	3609	63977	P57071	ILF3	PRDM15	2.19482e-05	0.153605	0.846373	5	7	Large Drosha complex; Nop56p-associated pre-rRNA complex; DGCR8-ILF3 complex; ILF3-XPO5 complex; DGCR8 multiprotein complex; DNA-PK-Ku-eIF2-NF90-NF45 complex; Emerin complex 52	20; 105; 2; 2; 11; 8; 23	2; 6; 1; 1; 1; 4; 1	1332; 3055; 3079; 3080; 3082; 5183; 5615
493	ILF3	-0.783728	-0.754569	0.000240586	0.00156936	-0.984896	-1.64198	612	3	ILF3_1; ILF3_3; ILF3_2	4	3609	Q12906	198	3609	64324	Q96L73	ILF3	NSD1	0.000237872	0.00259989	0.997162	5	7	Large Drosha complex; Nop56p-associated pre-rRNA complex; DGCR8-ILF3 complex; ILF3-XPO5 complex; DGCR8 multiprotein complex; DNA-PK-Ku-eIF2-NF90-NF45 complex; Emerin complex 52	20; 105; 2; 2; 11; 8; 23	2; 6; 1; 1; 1; 4; 1	1332; 3055; 3079; 3080; 3082; 5183; 5615
494	NUP88	-0.780515	-0.780515	0.00994608	0.0167562	-0.970459	-1.46652	25053	2	NUP88_4; NUP88_2	4	4927	Q99567	200	4927	57511	Q9Y2V7	NUP88	COG6	8.60149e-25	0.0248136	0.975186	1
495	POP7	-0.779933	-0.779933	0.00489007	0.0104132	-0.980424	-1.48158	12317	2	POP7_3; POP7_4	4	10248	O75817	201	10248	25871	Q6NW34	POP7	C3orf17	1.09025e-12	7.19553e-06	0.999993	5	1	Rnase/Mrp complex	10	5	123
496	POP7	-0.779933	-0.779933	0.00489007	0.0104132	-0.980424	-1.48158	12317	2	POP7_3; POP7_4	4	10248	O75817	201	10248	51367	Q969H6	POP7	POP5	8.23205e-14	4.46826e-09	1	5	1	Rnase/Mrp complex	10	5	123
497	POP7	-0.779933	-0.779933	0.00489007	0.0104132	-0.980424	-1.48158	12317	2	POP7_3; POP7_4	4	10248	O75817	201	10248	10557	P78345	POP7	RPP38	3.47145e-13	0.000118548	0.999881	5	1	Rnase/Mrp complex	10	5	123
498	POP7	-0.779933	-0.779933	0.00489007	0.0104132	-0.980424	-1.48158	12317	2	POP7_3; POP7_4	4	10248	O75817	201	10248	10556	P78346	POP7	RPP30	2.51041e-23	0.00014877	0.999851	5	1	Rnase/Mrp complex	10	5	123
499	POP7	-0.779933	-0.779933	0.00489007	0.0104132	-0.980424	-1.48158	12317	2	POP7_3; POP7_4	4	10248	O75817	201	10248	11102	O95059	POP7	RPP14	9.43413e-12	9.72946e-11	1	5	1	Rnase/Mrp complex	10	5	123
500	TMEM258	-0.779648	-0.930701	0.00221943	0.00616849	-0.963673	-1.60659	5654	3	TMEM258_3; TMEM258_4; TMEM258_1	4	746	P61165	202	746	6185	P04844	TMEM258	RPN2	1.79559e-22	0.00155628	0.998444	1
501	FBXO11	-0.769868	-0.723597	1.93502e-05	0.00031488	-0.983107	-1.7646	49	4	FBXO11_3; FBXO11_2; FBXO11_4; FBXO11_1	4	80204	Q86XK2	207	80204	11060	O00308	FBXO11	WWP2	1.00552e-09	0.00272892	0.997271	3	1	Neddylin ligase (FBXO11, SKP1, CUL1, RBX1)	4	1	1260
502	FBXO11	-0.769868	-0.723597	1.93502e-05	0.00031488	-0.983107	-1.7646	49	4	FBXO11_3; FBXO11_2; FBXO11_4; FBXO11_1	4	80204	Q86XK2	207	80204	3726	P17275	FBXO11	JUNB	2.35775e-06	0.159377	0.840621	3	1	Neddylin ligase (FBXO11, SKP1, CUL1, RBX1)	4	1	1260
503	FBXO11	-0.769868	-0.723597	1.93502e-05	0.00031488	-0.983107	-1.7646	49	4	FBXO11_3; FBXO11_2; FBXO11_4; FBXO11_1	4	80204	Q86XK2	207	80204	2355	P15408	FBXO11	FOSL2	1.01605e-08	0.113361	0.886639	3	1	Neddylin ligase (FBXO11, SKP1, CUL1, RBX1)	4	1	1260
504	CCDC93	-0.768217	-0.675933	4.95364e-05	0.000611519	-0.979274	-1.75772	127	4	CCDC93_4; CCDC93_1; CCDC93_3; CCDC93_2	4	54520	Q567U6	208	54520	51397	Q9Y6G5	CCDC93	COMMD10	2.34662e-11	6.09142e-06	0.999994	8	7	CCC-Wash (WASH1, FAM21C) complex; CCC complex; COMMD1-CCDC22-CCDC93-C16orf62 complex; CCDC22-CCDC93-C16orf62 complex; CCDC93-COMMD1-COMMD6 complex; COMMD1-CCDC93-C16orf62 complex; CCDC22-CCDC93-C16orf62-FAM21-WASH1 complex	15; 13; 4; 3; 3; 3; 5	9; 9; 3; 3; 1; 2; 3	6639; 6645; 7131; 7132; 7133; 7134; 7135
505	CCDC93	-0.768217	-0.675933	4.95364e-05	0.000611519	-0.979274	-1.75772	127	4	CCDC93_4; CCDC93_1; CCDC93_3; CCDC93_2	4	54520	Q567U6	208	54520	51122	Q86X83	CCDC93	COMMD2	2.52487e-13	3.12484e-07	1	8	7	CCC-Wash (WASH1, FAM21C) complex; CCC complex; COMMD1-CCDC22-CCDC93-C16orf62 complex; CCDC22-CCDC93-C16orf62 complex; CCDC93-COMMD1-COMMD6 complex; COMMD1-CCDC93-C16orf62 complex; CCDC22-CCDC93-C16orf62-FAM21-WASH1 complex	15; 13; 4; 3; 3; 3; 5	9; 9; 3; 3; 1; 2; 3	6639; 6645; 7131; 7132; 7133; 7134; 7135
506	CCDC93	-0.768217	-0.675933	4.95364e-05	0.000611519	-0.979274	-1.75772	127	4	CCDC93_4; CCDC93_1; CCDC93_3; CCDC93_2	4	54520	Q567U6	208	54520	51699	Q9UBQ0	CCDC93	VPS29	7.76784e-13	4.31125e-06	0.999996	8	7	CCC-Wash (WASH1, FAM21C) complex; CCC complex; COMMD1-CCDC22-CCDC93-C16orf62 complex; CCDC22-CCDC93-C16orf62 complex; CCDC93-COMMD1-COMMD6 complex; COMMD1-CCDC93-C16orf62 complex; CCDC22-CCDC93-C16orf62-FAM21-WASH1 complex	15; 13; 4; 3; 3; 3; 5	9; 9; 3; 3; 1; 2; 3	6639; 6645; 7131; 7132; 7133; 7134; 7135
507	CCDC93	-0.768217	-0.675933	4.95364e-05	0.000611519	-0.979274	-1.75772	127	4	CCDC93_4; CCDC93_1; CCDC93_3; CCDC93_2	4	54520	Q567U6	208	54520	54951	Q9NX08	CCDC93	COMMD8	1.36647e-13	6.22371e-07	0.999999	8	7	CCC-Wash (WASH1, FAM21C) complex; CCC complex; COMMD1-CCDC22-CCDC93-C16orf62 complex; CCDC22-CCDC93-C16orf62 complex; CCDC93-COMMD1-COMMD6 complex; COMMD1-CCDC93-C16orf62 complex; CCDC22-CCDC93-C16orf62-FAM21-WASH1 complex	15; 13; 4; 3; 3; 3; 5	9; 9; 3; 3; 1; 2; 3	6639; 6645; 7131; 7132; 7133; 7134; 7135
508	CCDC93	-0.768217	-0.675933	4.95364e-05	0.000611519	-0.979274	-1.75772	127	4	CCDC93_4; CCDC93_1; CCDC93_3; CCDC93_2	4	54520	Q567U6	208	54520	28952	O60826	CCDC93	CCDC22	1.45186e-12	8.32019e-07	0.999999	8	7	CCC-Wash (WASH1, FAM21C) complex; CCC complex; COMMD1-CCDC22-CCDC93-C16orf62 complex; CCDC22-CCDC93-C16orf62 complex; CCDC93-COMMD1-COMMD6 complex; COMMD1-CCDC93-C16orf62 complex; CCDC22-CCDC93-C16orf62-FAM21-WASH1 complex	15; 13; 4; 3; 3; 3; 5	9; 9; 3; 3; 1; 2; 3	6639; 6645; 7131; 7132; 7133; 7134; 7135
509	CCDC93	-0.768217	-0.675933	4.95364e-05	0.000611519	-0.979274	-1.75772	127	4	CCDC93_4; CCDC93_1; CCDC93_3; CCDC93_2	4	54520	Q567U6	208	54520	23412	Q9UBI1	CCDC93	COMMD3	1.25478e-13	2.64804e-07	1	8	7	CCC-Wash (WASH1, FAM21C) complex; CCC complex; COMMD1-CCDC22-CCDC93-C16orf62 complex; CCDC22-CCDC93-C16orf62 complex; CCDC93-COMMD1-COMMD6 complex; COMMD1-CCDC93-C16orf62 complex; CCDC22-CCDC93-C16orf62-FAM21-WASH1 complex	15; 13; 4; 3; 3; 3; 5	9; 9; 3; 3; 1; 2; 3	6639; 6645; 7131; 7132; 7133; 7134; 7135
510	CCDC93	-0.768217	-0.675933	4.95364e-05	0.000611519	-0.979274	-1.75772	127	4	CCDC93_4; CCDC93_1; CCDC93_3; CCDC93_2	4	54520	Q567U6	208	54520	54939	Q9H0A8	CCDC93	COMMD4	1.51583e-13	1.50001e-06	0.999998	8	7	CCC-Wash (WASH1, FAM21C) complex; CCC complex; COMMD1-CCDC22-CCDC93-C16orf62 complex; CCDC22-CCDC93-C16orf62 complex; CCDC93-COMMD1-COMMD6 complex; COMMD1-CCDC93-C16orf62 complex; CCDC22-CCDC93-C16orf62-FAM21-WASH1 complex	15; 13; 4; 3; 3; 3; 5	9; 9; 3; 3; 1; 2; 3	6639; 6645; 7131; 7132; 7133; 7134; 7135
511	CCDC93	-0.768217	-0.675933	4.95364e-05	0.000611519	-0.979274	-1.75772	127	4	CCDC93_4; CCDC93_1; CCDC93_3; CCDC93_2	4	54520	Q567U6	208	54520	28991	Q9GZQ3	CCDC93	COMMD5	7.51106e-14	1.58112e-06	0.999998	8	7	CCC-Wash (WASH1, FAM21C) complex; CCC complex; COMMD1-CCDC22-CCDC93-C16orf62 complex; CCDC22-CCDC93-C16orf62 complex; CCDC93-COMMD1-COMMD6 complex; COMMD1-CCDC93-C16orf62 complex; CCDC22-CCDC93-C16orf62-FAM21-WASH1 complex	15; 13; 4; 3; 3; 3; 5	9; 9; 3; 3; 1; 2; 3	6639; 6645; 7131; 7132; 7133; 7134; 7135
512	KDSR	-0.767978	-0.769071	0.000416021	0.00224549	-0.981602	-1.63649	1059	3	KDSR_4; KDSR_2; KDSR_1	4	2531	Q06136	209	2531	29956	Q96G23	KDSR	CERS2	3.22498e-11	0.023483	0.976517	5
513	KDSR	-0.767978	-0.769071	0.000416021	0.00224549	-0.981602	-1.63649	1059	3	KDSR_4; KDSR_2; KDSR_1	4	2531	Q06136	209	2531	203547	Q3ZAQ7	KDSR	VMA21	2.74681e-06	0.00161982	0.998377	5
514	KDSR	-0.767978	-0.769071	0.000416021	0.00224549	-0.981602	-1.63649	1059	3	KDSR_4; KDSR_2; KDSR_1	4	2531	Q06136	209	2531	10989	Q16891	KDSR	IMMT	1.11363e-18	0.224559	0.775441	5
515	KDSR	-0.767978	-0.769071	0.000416021	0.00224549	-0.981602	-1.63649	1059	3	KDSR_4; KDSR_2; KDSR_1	4	2531	Q06136	209	2531	4245	P26572	KDSR	MGAT1	1.03507e-11	0.084309	0.915691	5
516	KDSR	-0.767978	-0.769071	0.000416021	0.00224549	-0.981602	-1.63649	1059	3	KDSR_4; KDSR_2; KDSR_1	4	2531	Q06136	209	2531	6814	O00186	KDSR	STXBP3	3.61945e-12	0.176222	0.823778	5
517	PRKAR1A	-0.766949	-0.733845	0.0185518	0.0251098	-0.915081	-1.52558	47268	3	PRKAR1A_2; PRKAR1A_3; PRKAR1A_1	4	5573	P10644	210	5573	30968	Q9UJZ1	PRKAR1A	STOML2	3.70895e-13	0.00568342	0.994317	3
518	PRKAR1A	-0.766949	-0.733845	0.0185518	0.0251098	-0.915081	-1.52558	47268	3	PRKAR1A_2; PRKAR1A_3; PRKAR1A_1	4	5573	P10644	210	5573	1859	Q13627	PRKAR1A	DYRK1A	7.99549e-08	2.14639e-06	0.999998	3
519	PRKAR1A	-0.766949	-0.733845	0.0185518	0.0251098	-0.915081	-1.52558	47268	3	PRKAR1A_2; PRKAR1A_3; PRKAR1A_1	4	5573	P10644	210	5573	55206	A3KN83	PRKAR1A	SBNO1	2.14802e-14	0.0498613	0.950139	3
520	FBXW2	-0.763147	-0.774301	7.77877e-05	0.000762959	-0.976492	-1.75273	200	4	FBXW2_3; FBXW2_4; FBXW2_1; FBXW2_2	4	26190	Q9UKT8	212	26190	7332	P68036	FBXW2	UBE2L3	1.37443e-06	0.000107784	0.999891	1	1	Ubiquitin E3 ligase (SKP1A, FBXW2, CUL1)	3	1	390
521	XRCC5	-0.761333	-0.761333	0.0119834	0.0189407	-0.967137	-1.4615	30185	2	XRCC5_3; XRCC5_2	4	7520	P13010	215	7520	2547	P12956	XRCC5	XRCC6	1.04988e-09	0.00147835	0.998522	1	21	Ku antigen-NARG1 complex; DNA-PK-Ku complex; Ku antigen complex; PCNA-KU antigen complex; DNA double-strand break end-joining complex; Rap1 complex; TRF2-Ku complex; Vigilin-DNA-PK-Ku antigen complex; TERF2-RAP1 complex; Ku antigen-YY1-alphaMyHC promoter complex; DHX9-ADAR-vigilin-DNA-PK-Ku antigen complex; XRCC6-XRCC5-WRN complex; MGC1-DNA-PKcs-Ku complex; NCOA6-DNA-PK-Ku-PARP1 complex; DNA-PK-K…	3; 3; 2; 3; 7; 14; 3; 4; 7; 3; 6; 3; 4; 5; 8; 5; 4; 6; 3; 4; 9	3; 2; 2; 2; 2; 2; 2; 2; 2; 3; 2; 2; 2; 2; 4; 2; 2; 2; 2; 2; 2	95; 322; 328; 1092; 1189; 1193; 1220; 1571; 2766; 2918; 3102; 4082; 5176; 5179; 5183; 5231; 5235; 5251; 6310; 7217; 7285
522	WDR59	-0.753031	-0.753031	0.00448753	0.00979594	-0.981319	-1.48293	11303	2	WDR59_1; WDR59_2	4	79726	Q6PJI9	217	79726	79718	Q9BZK7	WDR59	TBL1XR1	1.79793e-13	0.032651	0.967349	4	3	GATOR2 complex; GATOR complex; SOG complex	5; 8; 8	3; 3; 3	6216; 6217; 6753
523	WDR59	-0.753031	-0.753031	0.00448753	0.00979594	-0.981319	-1.48293	11303	2	WDR59_1; WDR59_2	4	79726	Q6PJI9	217	79726	25942	Q96ST3	WDR59	SIN3A	1.46233e-11	0.117651	0.882349	4	3	GATOR2 complex; GATOR complex; SOG complex	5; 8; 8	3; 3; 3	6216; 6217; 6753
524	WDR59	-0.753031	-0.753031	0.00448753	0.00979594	-0.981319	-1.48293	11303	2	WDR59_1; WDR59_2	4	79726	Q6PJI9	217	79726	8841	O15379	WDR59	HDAC3	2.65619e-09	5.37233e-05	0.999946	4	3	GATOR2 complex; GATOR complex; SOG complex	5; 8; 8	3; 3; 3	6216; 6217; 6753
525	WDR59	-0.753031	-0.753031	0.00448753	0.00979594	-0.981319	-1.48293	11303	2	WDR59_1; WDR59_2	4	79726	Q6PJI9	217	79726	5929	Q15291	WDR59	RBBP5	3.36681e-09	0.177412	0.822588	4	3	GATOR2 complex; GATOR complex; SOG complex	5; 8; 8	3; 3; 3	6216; 6217; 6753
526	WDFY3	-0.750343	-0.750465	9.90729e-05	0.000897926	-0.974902	-1.74987	255	4	WDFY3_3; WDFY3_2; WDFY3_1; WDFY3_4	4	23001	Q8IZQ1	218	23001	201163	Q8NFG4	WDFY3	FLCN	5.34877e-11	3.33413e-06	0.999997	2
527	WDFY3	-0.750343	-0.750465	9.90729e-05	0.000897926	-0.974902	-1.74987	255	4	WDFY3_3; WDFY3_2; WDFY3_1; WDFY3_4	4	23001	Q8IZQ1	218	23001	5045	P09958	WDFY3	FURIN	0.00100431	0.0448024	0.954193	2
528	HGS	-0.749063	-0.628615	0.000683294	0.00300147	-0.977372	-1.62943	1740	3	HGS_3; HGS_1; HGS_4	4	9146	O14964	219	9146	3312	P11142	HGS	HSPA8	3.56742e-08	0.00317049	0.996829	1	4	SNARE complex (HGS, SNAP25, STX13); RIN1-STAM2-HRS complex; CART complex; SIMPLE-HRS-STAM1 complex	3; 3; 4; 3	1; 1; 1; 1	706; 3677; 6083; 7287
529	VPS35	-0.74904	-0.727494	0.00081124	0.00331913	-0.975683	-1.62662	2066	3	VPS35_4; VPS35_3; VPS35_1	3	55737	Q96QK1	220	55737	79036	Q9BQD3	VPS35	KXD1	2.34234e-12	0.00764242	0.992358	2	2	Retromer complex (SNX1, SNX2, VPS35, VPS29, VPS26A); Retromer complex (SNX1, SNX2, VPS35, VPS29, VPS26B)	5; 5	2; 2	657; 1060
530	VPS35	-0.74904	-0.727494	0.00081124	0.00331913	-0.975683	-1.62662	2066	3	VPS35_4; VPS35_3; VPS35_1	3	55737	Q96QK1	220	55737	51699	Q9UBQ0	VPS35	VPS29	4.1064e-28	3.20977e-10	1	2	2	Retromer complex (SNX1, SNX2, VPS35, VPS29, VPS26A); Retromer complex (SNX1, SNX2, VPS35, VPS29, VPS26B)	5; 5	2; 2	657; 1060
531	GRB2	-0.745111	-0.737302	4.83754e-05	0.00061132	-0.979459	-1.75805	124	4	GRB2_1; GRB2_2; GRB2_3; GRB2_4	4	2885	P62993	221	2885	1540	Q9NQC7	GRB2	CYLD	1.93106e-09	7.88694e-08	1	1	14	CIN85 complex (CIN85, CRK, BCAR1, CBL, PIK3R1, GRB2, SOS1); LAT-PLC-gamma-1-p85-GRB2-CBL-VAV-SLP-76 signaling complex, C305 activated; Cbl-SLP-76-Grb2 complex, Fc receptor gamma-R1 stimulated; SLP-76-Cbl-Grb2-Shc complex, Fc receptor gamma-R1 stimulated; PLC-gamma-2-SLP-76-Lyn-Grb2 complex; EGFR-CBL-GRB2 complex; BCR-ABL (p185 fusion protein)-GRB2 complex; BCR-ABL (p210 fusion protein)-GRB2-SOS1 …	7; 7; 3; 4; 4; 3; 2; 3; 2; 5; 2; 4; 2; 2	1; 1; 1; 1; 2; 1; 1; 1; 1; 1; 1; 1; 1; 1	2480; 2529; 2534; 2535; 2536; 2542; 2892; 2893; 2895; 2922; 2957; 3096; 3144; 3186
532	PSMD13	-0.743917	-0.773444	0.000137773	0.00112404	-0.97219	-1.745	355	4	PSMD13_3; PSMD13_4; PSMD13_1; PSMD13_2	4	5719	Q9UNM6	222	5719	5717	O00231	PSMD13	PSMD11	1.54106e-12	0.000495255	0.999505	2	3	PA700 complex; 26S proteasome; PA700-20S-PA28 complex	20; 22; 36	3; 3; 4	32; 181; 193
533	PSMD13	-0.743917	-0.773444	0.000137773	0.00112404	-0.97219	-1.745	355	4	PSMD13_3; PSMD13_4; PSMD13_1; PSMD13_2	4	5719	Q9UNM6	222	5719	5710	P55036	PSMD13	PSMD4	2.29964e-25	2.92072e-07	1	2	3	PA700 complex; 26S proteasome; PA700-20S-PA28 complex	20; 22; 36	3; 3; 4	32; 181; 193
534	C21orf59	-0.743139	-0.765071	0.0014961	0.00486914	-0.968926	-1.61535	3811	3	C21orf59_3; C21orf59_4; C21orf59_2	4	56683	P57076	223	56683	3312	P11142	C21orf59	HSPA8	8.72408e-24	0.00897341	0.991027	1
535	COG6	-0.741793	-0.741793	0.00664157	0.0127149	-0.976634	-1.47585	16729	2	COG6_2; COG6_4	4	57511	Q9Y2V7	224	57511	23265	Q9UPT5	COG6	EXOC7	2.7095e-12	0.000281079	0.999719	12	4	COG complex; Tetrameric COG subcomplex; COG5-COG6-COG7 subcomplex; COG1-COG8-COG5-COG6-COG7 subcomplex	8; 4; 3; 5	2; 2; 2; 2	162; 3525; 3545; 3552
536	COG6	-0.741793	-0.741793	0.00664157	0.0127149	-0.976634	-1.47585	16729	2	COG6_2; COG6_4	4	57511	Q9Y2V7	224	57511	55763	Q9NV70	COG6	EXOC1	7.74229e-10	0.0653177	0.934682	12	4	COG complex; Tetrameric COG subcomplex; COG5-COG6-COG7 subcomplex; COG1-COG8-COG5-COG6-COG7 subcomplex	8; 4; 3; 5	2; 2; 2; 2	162; 3525; 3545; 3552
537	COG6	-0.741793	-0.741793	0.00664157	0.0127149	-0.976634	-1.47585	16729	2	COG6_2; COG6_4	4	57511	Q9Y2V7	224	57511	282991	Q6QNY1	COG6	BLOC1S2	7.52061e-07	0.0205181	0.979481	12	4	COG complex; Tetrameric COG subcomplex; COG5-COG6-COG7 subcomplex; COG1-COG8-COG5-COG6-COG7 subcomplex	8; 4; 3; 5	2; 2; 2; 2	162; 3525; 3545; 3552
538	COG6	-0.741793	-0.741793	0.00664157	0.0127149	-0.976634	-1.47585	16729	2	COG6_2; COG6_4	4	57511	Q9Y2V7	224	57511	9342	O95721	COG6	SNAP29	9.34114e-12	0.135679	0.864321	12	4	COG complex; Tetrameric COG subcomplex; COG5-COG6-COG7 subcomplex; COG1-COG8-COG5-COG6-COG7 subcomplex	8; 4; 3; 5	2; 2; 2; 2	162; 3525; 3545; 3552
539	COG6	-0.741793	-0.741793	0.00664157	0.0127149	-0.976634	-1.47585	16729	2	COG6_2; COG6_4	4	57511	Q9Y2V7	224	57511	28952	O60826	COG6	CCDC22	6.95452e-14	0.0164399	0.98356	12	4	COG complex; Tetrameric COG subcomplex; COG5-COG6-COG7 subcomplex; COG1-COG8-COG5-COG6-COG7 subcomplex	8; 4; 3; 5	2; 2; 2; 2	162; 3525; 3545; 3552
540	COG6	-0.741793	-0.741793	0.00664157	0.0127149	-0.976634	-1.47585	16729	2	COG6_2; COG6_4	4	57511	Q9Y2V7	224	57511	51542	Q9P1Q0	COG6	VPS54	0.04838	0.000292815	0.951327	12	4	COG complex; Tetrameric COG subcomplex; COG5-COG6-COG7 subcomplex; COG1-COG8-COG5-COG6-COG7 subcomplex	8; 4; 3; 5	2; 2; 2; 2	162; 3525; 3545; 3552
541	COG6	-0.741793	-0.741793	0.00664157	0.0127149	-0.976634	-1.47585	16729	2	COG6_2; COG6_4	4	57511	Q9Y2V7	224	57511	23557	O95295	COG6	SNAPIN	1.12186e-07	0.219874	0.780126	12	4	COG complex; Tetrameric COG subcomplex; COG5-COG6-COG7 subcomplex; COG1-COG8-COG5-COG6-COG7 subcomplex	8; 4; 3; 5	2; 2; 2; 2	162; 3525; 3545; 3552
542	COG6	-0.741793	-0.741793	0.00664157	0.0127149	-0.976634	-1.47585	16729	2	COG6_2; COG6_4	4	57511	Q9Y2V7	224	57511	91949	P83436	COG6	COG7	1.3291e-22	3.20643e-12	1	12	4	COG complex; Tetrameric COG subcomplex; COG5-COG6-COG7 subcomplex; COG1-COG8-COG5-COG6-COG7 subcomplex	8; 4; 3; 5	2; 2; 2; 2	162; 3525; 3545; 3552
543	COG6	-0.741793	-0.741793	0.00664157	0.0127149	-0.976634	-1.47585	16729	2	COG6_2; COG6_4	4	57511	Q9Y2V7	224	57511	55845	Q8WUW1	COG6	BRK1	8.63557e-12	0.000953136	0.999047	12	4	COG complex; Tetrameric COG subcomplex; COG5-COG6-COG7 subcomplex; COG1-COG8-COG5-COG6-COG7 subcomplex	8; 4; 3; 5	2; 2; 2; 2	162; 3525; 3545; 3552
544	COG6	-0.741793	-0.741793	0.00664157	0.0127149	-0.976634	-1.47585	16729	2	COG6_2; COG6_4	4	57511	Q9Y2V7	224	57511	54951	Q9NX08	COG6	COMMD8	3.56503e-10	0.00156549	0.998435	12	4	COG complex; Tetrameric COG subcomplex; COG5-COG6-COG7 subcomplex; COG1-COG8-COG5-COG6-COG7 subcomplex	8; 4; 3; 5	2; 2; 2; 2	162; 3525; 3545; 3552
545	COG6	-0.741793	-0.741793	0.00664157	0.0127149	-0.976634	-1.47585	16729	2	COG6_2; COG6_4	4	57511	Q9Y2V7	224	57511	51382	Q9Y5K8	COG6	ATP6V1D	1.08642e-12	0.00190649	0.998094	12	4	COG complex; Tetrameric COG subcomplex; COG5-COG6-COG7 subcomplex; COG1-COG8-COG5-COG6-COG7 subcomplex	8; 4; 3; 5	2; 2; 2; 2	162; 3525; 3545; 3552
546	COG6	-0.741793	-0.741793	0.00664157	0.0127149	-0.976634	-1.47585	16729	2	COG6_2; COG6_4	4	57511	Q9Y2V7	224	57511	4927	Q99567	COG6	NUP88	8.60149e-25	0.0248136	0.975186	12	4	COG complex; Tetrameric COG subcomplex; COG5-COG6-COG7 subcomplex; COG1-COG8-COG5-COG6-COG7 subcomplex	8; 4; 3; 5	2; 2; 2; 2	162; 3525; 3545; 3552
547	ATP6V1G1	-0.740795	-0.740795	0.0302368	0.0352599	-0.943545	-1.42585	76165	2	ATP6V1G1_4; ATP6V1G1_1	4	9550	O75348	225	9550	51382	Q9Y5K8	ATP6V1G1	ATP6V1D	2.79165e-25	6.01137e-09	1	6
548	ATP6V1G1	-0.740795	-0.740795	0.0302368	0.0352599	-0.943545	-1.42585	76165	2	ATP6V1G1_4; ATP6V1G1_1	4	9550	O75348	225	9550	528	P21283	ATP6V1G1	ATP6V1C1	2.88872e-13	3.58784e-06	0.999996	6
549	ATP6V1G1	-0.740795	-0.740795	0.0302368	0.0352599	-0.943545	-1.42585	76165	2	ATP6V1G1_4; ATP6V1G1_1	4	9550	O75348	225	9550	9296	Q16864	ATP6V1G1	ATP6V1F	7.57126e-13	0.000102279	0.999898	6
550	ATP6V1G1	-0.740795	-0.740795	0.0302368	0.0352599	-0.943545	-1.42585	76165	2	ATP6V1G1_4; ATP6V1G1_1	4	9550	O75348	225	9550	529	P36543	ATP6V1G1	ATP6V1E1	3.53704e-11	2.0598e-05	0.999979	6
551	ATP6V1G1	-0.740795	-0.740795	0.0302368	0.0352599	-0.943545	-1.42585	76165	2	ATP6V1G1_4; ATP6V1G1_1	4	9550	O75348	225	9550	23335	Q9Y4E6	ATP6V1G1	WDR7	1.77414e-09	1.60447e-05	0.999984	6
552	ATP6V1G1	-0.740795	-0.740795	0.0302368	0.0352599	-0.943545	-1.42585	76165	2	ATP6V1G1_4; ATP6V1G1_1	4	9550	O75348	225	9550	523	P38606	ATP6V1G1	ATP6V1A	1.16994e-13	0.000308569	0.999691	6
553	CCNH	-0.740619	-0.740619	0.00341368	0.00837053	-0.983988	-1.48697	8598	2	CCNH_3; CCNH_4	4	902	P51946	226	902	4331	P51948	CCNH	MNAT1	6.49267e-19	1.07467e-12	1	1	7	TFIIH transcription factor complex; CAK core complex (Cdk-activating kinase core complex); CAK complex (Cdk-activating kinase complex); TFIIH transcription factor complex; CAK-ERCC2 complex; ESR1-CDK7-CCNH-MNAT1-MTA1-HDAC2 complex; RNA polymerase II complex, (CDK8 complex), chromatin structure modifying	19; 2; 3; 19; 4; 6; 8	7; 1; 2; 7; 2; 2; 3	107; 1007; 1008; 1029; 1030; 2657; 3067
554	MLLT1	-0.737542	-0.619574	0.00375792	0.00887646	-0.955127	-1.59235	9574	3	MLLT1_2; MLLT1_3; MLLT1_1	4	4298	Q03111	227	4298	5305	P48426	MLLT1	PIP4K2A	2.71708e-10	2.24524e-06	0.999998	1	3	EBAFb complex; EBAFa complex; AFF4 super elongation complex (SEC)	10; 10; 11	4; 5; 1	1239; 1252; 6084
555	LAMTOR1	-0.737103	-0.753591	0.00153253	0.00489863	-0.942677	-1.69203	3959	4	LAMTOR1_4; LAMTOR1_3; LAMTOR1_2; LAMTOR1_1	4	55004	Q6IAA8	228	55004	28956	Q9Y2Q5	LAMTOR1	LAMTOR2	5.25394e-23	4.84299e-05	0.999952	17	1	v-ATPase-Ragulator-AXIN/LKB1-AMPK complex	14	7	6888
556	LAMTOR1	-0.737103	-0.753591	0.00153253	0.00489863	-0.942677	-1.69203	3959	4	LAMTOR1_4; LAMTOR1_3; LAMTOR1_2; LAMTOR1_1	4	55004	Q6IAA8	228	55004	85365	Q9H553	LAMTOR1	ALG2	4.97142e-09	1.02163e-07	1	17	1	v-ATPase-Ragulator-AXIN/LKB1-AMPK complex	14	7	6888
557	LAMTOR1	-0.737103	-0.753591	0.00153253	0.00489863	-0.942677	-1.69203	3959	4	LAMTOR1_4; LAMTOR1_3; LAMTOR1_2; LAMTOR1_1	4	55004	Q6IAA8	228	55004	282991	Q6QNY1	LAMTOR1	BLOC1S2	0.0255365	0.00495799	0.969505	17	1	v-ATPase-Ragulator-AXIN/LKB1-AMPK complex	14	7	6888
558	LAMTOR1	-0.737103	-0.753591	0.00153253	0.00489863	-0.942677	-1.69203	3959	4	LAMTOR1_4; LAMTOR1_3; LAMTOR1_2; LAMTOR1_1	4	55004	Q6IAA8	228	55004	118426	Q969J3	LAMTOR1	LOH12CR1	2.05765e-13	2.05141e-05	0.999979	17	1	v-ATPase-Ragulator-AXIN/LKB1-AMPK complex	14	7	6888
559	LAMTOR1	-0.737103	-0.753591	0.00153253	0.00489863	-0.942677	-1.69203	3959	4	LAMTOR1_4; LAMTOR1_3; LAMTOR1_2; LAMTOR1_1	4	55004	Q6IAA8	228	55004	54785	Q96GS4	LAMTOR1	C17orf59	1.53668e-24	2.94739e-08	1	17	1	v-ATPase-Ragulator-AXIN/LKB1-AMPK complex	14	7	6888
560	LAMTOR1	-0.737103	-0.753591	0.00153253	0.00489863	-0.942677	-1.69203	3959	4	LAMTOR1_4; LAMTOR1_3; LAMTOR1_2; LAMTOR1_1	4	55004	Q6IAA8	228	55004	10542	O43504	LAMTOR1	LAMTOR5	1.3555e-21	0.00029032	0.99971	17	1	v-ATPase-Ragulator-AXIN/LKB1-AMPK complex	14	7	6888
561	LAMTOR1	-0.737103	-0.753591	0.00153253	0.00489863	-0.942677	-1.69203	3959	4	LAMTOR1_4; LAMTOR1_3; LAMTOR1_2; LAMTOR1_1	4	55004	Q6IAA8	228	55004	201163	Q8NFG4	LAMTOR1	FLCN	0.000402505	0.00248989	0.997108	17	1	v-ATPase-Ragulator-AXIN/LKB1-AMPK complex	14	7	6888
562	LAMTOR1	-0.737103	-0.753591	0.00153253	0.00489863	-0.942677	-1.69203	3959	4	LAMTOR1_4; LAMTOR1_3; LAMTOR1_2; LAMTOR1_1	4	55004	Q6IAA8	228	55004	80230	Q96T51	LAMTOR1	RUFY1	0.000524263	0.0298993	0.969576	17	1	v-ATPase-Ragulator-AXIN/LKB1-AMPK complex	14	7	6888
563	LAMTOR1	-0.737103	-0.753591	0.00153253	0.00489863	-0.942677	-1.69203	3959	4	LAMTOR1_4; LAMTOR1_3; LAMTOR1_2; LAMTOR1_1	4	55004	Q6IAA8	228	55004	79036	Q9BQD3	LAMTOR1	KXD1	3.49761e-23	0.00224615	0.997754	17	1	v-ATPase-Ragulator-AXIN/LKB1-AMPK complex	14	7	6888
564	LAMTOR1	-0.737103	-0.753591	0.00153253	0.00489863	-0.942677	-1.69203	3959	4	LAMTOR1_4; LAMTOR1_3; LAMTOR1_2; LAMTOR1_1	4	55004	Q6IAA8	228	55004	23557	O95295	LAMTOR1	SNAPIN	8.08456e-11	0.00604842	0.993952	17	1	v-ATPase-Ragulator-AXIN/LKB1-AMPK complex	14	7	6888
565	LAMTOR1	-0.737103	-0.753591	0.00153253	0.00489863	-0.942677	-1.69203	3959	4	LAMTOR1_4; LAMTOR1_3; LAMTOR1_2; LAMTOR1_1	4	55004	Q6IAA8	228	55004	10670	Q7L523	LAMTOR1	RRAGA	5.82195e-11	2.92807e-09	1	17	1	v-ATPase-Ragulator-AXIN/LKB1-AMPK complex	14	7	6888
566	LAMTOR1	-0.737103	-0.753591	0.00153253	0.00489863	-0.942677	-1.69203	3959	4	LAMTOR1_4; LAMTOR1_3; LAMTOR1_2; LAMTOR1_1	4	55004	Q6IAA8	228	55004	8649	Q9UHA4	LAMTOR1	LAMTOR3	3.90607e-24	8.22885e-11	1	17	1	v-ATPase-Ragulator-AXIN/LKB1-AMPK complex	14	7	6888
567	LAMTOR1	-0.737103	-0.753591	0.00153253	0.00489863	-0.942677	-1.69203	3959	4	LAMTOR1_4; LAMTOR1_3; LAMTOR1_2; LAMTOR1_1	4	55004	Q6IAA8	228	55004	389541	Q0VGL1	LAMTOR1	LAMTOR4	1.23125e-21	9.91536e-13	1	17	1	v-ATPase-Ragulator-AXIN/LKB1-AMPK complex	14	7	6888
568	LAMTOR1	-0.737103	-0.753591	0.00153253	0.00489863	-0.942677	-1.69203	3959	4	LAMTOR1_4; LAMTOR1_3; LAMTOR1_2; LAMTOR1_1	4	55004	Q6IAA8	228	55004	119032	Q96B45	LAMTOR1	C10orf32	8.37294e-27	0.000147158	0.999853	17	1	v-ATPase-Ragulator-AXIN/LKB1-AMPK complex	14	7	6888
569	LAMTOR1	-0.737103	-0.753591	0.00153253	0.00489863	-0.942677	-1.69203	3959	4	LAMTOR1_4; LAMTOR1_3; LAMTOR1_2; LAMTOR1_1	4	55004	Q6IAA8	228	55004	729991	Q96FH0	LAMTOR1	MEF2BNB	1.33452e-24	9.12605e-05	0.999909	17	1	v-ATPase-Ragulator-AXIN/LKB1-AMPK complex	14	7	6888
570	LAMTOR1	-0.737103	-0.753591	0.00153253	0.00489863	-0.942677	-1.69203	3959	4	LAMTOR1_4; LAMTOR1_3; LAMTOR1_2; LAMTOR1_1	4	55004	Q6IAA8	228	55004	2647	P78537	LAMTOR1	BLOC1S1	4.60288e-21	0.00207002	0.99793	17	1	v-ATPase-Ragulator-AXIN/LKB1-AMPK complex	14	7	6888
571	LAMTOR1	-0.737103	-0.753591	0.00153253	0.00489863	-0.942677	-1.69203	3959	4	LAMTOR1_4; LAMTOR1_3; LAMTOR1_2; LAMTOR1_1	4	55004	Q6IAA8	228	55004	29956	Q96G23	LAMTOR1	CERS2	2.47104e-14	0.179353	0.820647	17	1	v-ATPase-Ragulator-AXIN/LKB1-AMPK complex	14	7	6888
572	SNAP23	-0.73531	-0.904321	0.00836751	0.0150531	-0.938504	-1.56463	21319	3	SNAP23_1; SNAP23_2; SNAP23_4	4	8773	O00161	229	8773	9342	O95721	SNAP23	SNAP29	1.4952e-10	0.00211436	0.997886	2	8	SNARE complex (STX4, SNAP23, VAMP1); SNARE complex (STX4, SNAP23, VAMP2); SNARE complex (STX11, VAMP2, SNAP23); SNARE complex (STX2, SNAP23); SNARE complex (STX4, SNAP23); SNARE complex (STX6, SNAP23); SNARE complex (SNAP23, STX1A); SNARE complex (STX4, VAMP8, VAMP3, SNAP23)	3; 3; 3; 2; 2; 2; 2; 4	1; 1; 1; 1; 1; 1; 1; 1	730; 731; 797; 801; 805; 820; 915; 1169
573	SNAP23	-0.73531	-0.904321	0.00836751	0.0150531	-0.938504	-1.56463	21319	3	SNAP23_1; SNAP23_2; SNAP23_4	4	8773	O00161	229	8773	29956	Q96G23	SNAP23	CERS2	1.6453e-15	0.0733155	0.926684	2	8	SNARE complex (STX4, SNAP23, VAMP1); SNARE complex (STX4, SNAP23, VAMP2); SNARE complex (STX11, VAMP2, SNAP23); SNARE complex (STX2, SNAP23); SNARE complex (STX4, SNAP23); SNARE complex (STX6, SNAP23); SNARE complex (SNAP23, STX1A); SNARE complex (STX4, VAMP8, VAMP3, SNAP23)	3; 3; 3; 2; 2; 2; 2; 4	1; 1; 1; 1; 1; 1; 1; 1	730; 731; 797; 801; 805; 820; 915; 1169
574	ACTR8	-0.732865	-0.730748	0.000456664	0.00238665	-0.960408	-1.72386	1179	4	ACTR8_4; ACTR8_2; ACTR8_1; ACTR8_3	4	93973	Q9H981	231	93973	79269	Q5QP82	ACTR8	DCAF10	1.53768e-16	0.063089	0.936911	3	1	INO80 chromatin remodeling complex	13	5	302
575	ACTR8	-0.732865	-0.730748	0.000456664	0.00238665	-0.960408	-1.72386	1179	4	ACTR8_4; ACTR8_2; ACTR8_1; ACTR8_3	4	93973	Q9H981	231	93973	29844	P0C1Z6	ACTR8	TFPT	2.88796e-08	1.37772e-05	0.999986	3	1	INO80 chromatin remodeling complex	13	5	302
576	ACTR8	-0.732865	-0.730748	0.000456664	0.00238665	-0.960408	-1.72386	1179	4	ACTR8_4; ACTR8_2; ACTR8_1; ACTR8_3	4	93973	Q9H981	231	93973	54617	Q9ULG1	ACTR8	INO80	7.23261e-11	2.88423e-08	1	3	1	INO80 chromatin remodeling complex	13	5	302
577	THOC3	-0.729823	-0.729823	0.00270585	0.0071004	-0.985989	-1.48999	6815	2	THOC3_4; THOC3_3	4	84321	Q96J01	232	84321	8563	Q13769	THOC3	THOC5	9.65157e-15	0.000648247	0.999352	2	3	Spliceosome; TREX complex; hTREX84 complex	143; 8; 6	9; 3; 3	351; 770; 6160
578	THOC3	-0.729823	-0.729823	0.00270585	0.0071004	-0.985989	-1.48999	6815	2	THOC3_4; THOC3_3	4	84321	Q96J01	232	84321	9984	Q96FV9	THOC3	THOC1	1.3741e-24	6.21035e-07	0.999999	2	3	Spliceosome; TREX complex; hTREX84 complex	143; 8; 6	9; 3; 3	351; 770; 6160
579	XPR1	-0.729047	-0.673953	0.000837929	0.00337054	-0.975314	-1.626	2134	3	XPR1_4; XPR1_1; XPR1_2	4	9213	Q9UBH6	234	9213	57498	Q9ULH0	XPR1	KIDINS220	1.24673e-15	7.16883e-06	0.999993	1
580	MEF2BNB	-0.727326	-0.842697	0.00709551	0.0134047	-0.942351	-1.57105	18078	3	MEF2BNB_3; MEF2BNB_2; MEF2BNB_1	4	729991	Q96FH0	237	729991	55004	Q6IAA8	MEF2BNB	LAMTOR1	1.33452e-24	9.12605e-05	0.999909	9	1	BORC complex	8	8	7545
581	MEF2BNB	-0.727326	-0.842697	0.00709551	0.0134047	-0.942351	-1.57105	18078	3	MEF2BNB_3; MEF2BNB_2; MEF2BNB_1	4	729991	Q96FH0	237	729991	282991	Q6QNY1	MEF2BNB	BLOC1S2	3.3348e-10	9.85365e-08	1	9	1	BORC complex	8	8	7545
582	MEF2BNB	-0.727326	-0.842697	0.00709551	0.0134047	-0.942351	-1.57105	18078	3	MEF2BNB_3; MEF2BNB_2; MEF2BNB_1	4	729991	Q96FH0	237	729991	2647	P78537	MEF2BNB	BLOC1S1	1.79569e-18	4.21379e-12	1	9	1	BORC complex	8	8	7545
583	MEF2BNB	-0.727326	-0.842697	0.00709551	0.0134047	-0.942351	-1.57105	18078	3	MEF2BNB_3; MEF2BNB_2; MEF2BNB_1	4	729991	Q96FH0	237	729991	118426	Q969J3	MEF2BNB	LOH12CR1	2.43666e-13	6.53597e-08	1	9	1	BORC complex	8	8	7545
584	MEF2BNB	-0.727326	-0.842697	0.00709551	0.0134047	-0.942351	-1.57105	18078	3	MEF2BNB_3; MEF2BNB_2; MEF2BNB_1	4	729991	Q96FH0	237	729991	54785	Q96GS4	MEF2BNB	C17orf59	6.40482e-20	4.32666e-13	1	9	1	BORC complex	8	8	7545
585	MEF2BNB	-0.727326	-0.842697	0.00709551	0.0134047	-0.942351	-1.57105	18078	3	MEF2BNB_3; MEF2BNB_2; MEF2BNB_1	4	729991	Q96FH0	237	729991	79036	Q9BQD3	MEF2BNB	KXD1	7.79584e-22	1.32959e-12	1	9	1	BORC complex	8	8	7545
586	MEF2BNB	-0.727326	-0.842697	0.00709551	0.0134047	-0.942351	-1.57105	18078	3	MEF2BNB_3; MEF2BNB_2; MEF2BNB_1	4	729991	Q96FH0	237	729991	23557	O95295	MEF2BNB	SNAPIN	1.04305e-12	4.53495e-06	0.999995	9	1	BORC complex	8	8	7545
587	MEF2BNB	-0.727326	-0.842697	0.00709551	0.0134047	-0.942351	-1.57105	18078	3	MEF2BNB_3; MEF2BNB_2; MEF2BNB_1	4	729991	Q96FH0	237	729991	119032	Q96B45	MEF2BNB	C10orf32	1.60805e-22	2.19962e-15	1	9	1	BORC complex	8	8	7545
588	MEF2BNB	-0.727326	-0.842697	0.00709551	0.0134047	-0.942351	-1.57105	18078	3	MEF2BNB_3; MEF2BNB_2; MEF2BNB_1	4	729991	Q96FH0	237	729991	10542	O43504	MEF2BNB	LAMTOR5	3.48631e-07	0.00179582	0.998204	9	1	BORC complex	8	8	7545
589	PPP1R21	-0.725871	-0.691696	0.000774007	0.00322672	-0.953338	-1.71117	1999	4	PPP1R21_2; PPP1R21_3; PPP1R21_1; PPP1R21_4	4	129285	Q6ZMI0	239	129285	5832	P54886	PPP1R21	ALDH18A1	2.24155e-13	0.0022021	0.997798	4
590	PPP1R21	-0.725871	-0.691696	0.000774007	0.00322672	-0.953338	-1.71117	1999	4	PPP1R21_2; PPP1R21_3; PPP1R21_1; PPP1R21_4	4	129285	Q6ZMI0	239	129285	55671	Q6IN85	PPP1R21	SMEK1	0.00371631	0.0205294	0.975754	4
591	PPP1R21	-0.725871	-0.691696	0.000774007	0.00322672	-0.953338	-1.71117	1999	4	PPP1R21_2; PPP1R21_3; PPP1R21_1; PPP1R21_4	4	129285	Q6ZMI0	239	129285	57448	Q9NR09	PPP1R21	BIRC6	8.76978e-14	0.00180253	0.998197	4
592	PPP1R21	-0.725871	-0.691696	0.000774007	0.00322672	-0.953338	-1.71117	1999	4	PPP1R21_2; PPP1R21_3; PPP1R21_1; PPP1R21_4	4	129285	Q6ZMI0	239	129285	57102	Q9NQ89	PPP1R21	C12orf4	1.15377e-10	3.26578e-09	1	4
593	NVL	-0.724299	-0.705543	0.000224887	0.00156936	-0.985336	-1.64271	572	3	NVL_4; NVL_3; NVL_2	4	4931	O15381	240	4931	3609	Q12906	NVL	ILF3	2.43774e-12	0.0549201	0.94508	5
594	NVL	-0.724299	-0.705543	0.000224887	0.00156936	-0.985336	-1.64271	572	3	NVL_4; NVL_3; NVL_2	4	4931	O15381	240	4931	6208	P62263	NVL	RPS14	2.19765e-29	0.207933	0.792067	5
595	NVL	-0.724299	-0.705543	0.000224887	0.00156936	-0.985336	-1.64271	572	3	NVL_4; NVL_3; NVL_2	4	4931	O15381	240	4931	6727	P37108	NVL	SRP14	6.45126e-14	0.109951	0.890049	5
596	NVL	-0.724299	-0.705543	0.000224887	0.00156936	-0.985336	-1.64271	572	3	NVL_4; NVL_3; NVL_2	4	4931	O15381	240	4931	9277	O15213	NVL	WDR46	2.11862e-15	0.213464	0.786536	5
597	NVL	-0.724299	-0.705543	0.000224887	0.00156936	-0.985336	-1.64271	572	3	NVL_4; NVL_3; NVL_2	4	4931	O15381	240	4931	5936	Q9BWF3	NVL	RBM4	6.78503e-14	0.176999	0.823001	5
598	P4HB	-0.723892	-0.685582	0.000101008	0.000904021	-0.97476	-1.74962	260	4	P4HB_1; P4HB_4; P4HB_2; P4HB_3	4	5034	P07237	241	5034	5033	P13674	P4HB	P4HA1	6.2588e-30	0.162173	0.837827	1	2	Prolyl 4-hydroxylase (alpha(I)-type); Prolyl 4-hydroxylase (alpha(III)-type)	2; 2	2; 1	472; 474
599	TAF7	-0.722872	-0.695482	0.00276183	0.00716474	-0.960266	-1.60091	7036	3	TAF7_1; TAF7_4; TAF7_2	4	6879	Q15545	242	6879	83860	Q5VWG9	TAF7	TAF3	5.918e-13	0.00114769	0.998852	1	11	TFTC complex (TATA-binding protein-free TAF-II-containing complex); TFIID-beta complex; TFTC complex (TATA-binding protein-free TAF-II-containing complex); TFIID complex; TFIID complex, B-cell specific; DA complex; DAB complex; TFIID complex; TFTC complex (TATA-binding protein-free TAF-II-containing complex); TFIID-beta complex; MLL1-WDR5 complex	50; 24; 50; 23; 12; 15; 16; 23; 50; 24; 27	9; 6; 9; 6; 3; 4; 4; 6; 9; 6; 5	445; 469; 470; 484; 485; 492; 493; 509; 513; 514; 5386
600	PPP6C	-0.722779	-0.722779	0.00379717	0.00887646	-0.982994	-1.48546	9564	2	PPP6C_1; PPP6C_4	4	5537	O00743	243	5537	57448	Q9NR09	PPP6C	BIRC6	3.10363e-13	0.00994321	0.990057	1	1	TNF-alpha/NF-kappa B signaling complex (CHUK, BTRC, NFKB2, PPP6C, REL, CUL1, IKBKE, SAPS2, SAPS1, ANKRD28, RELA, SKP1)	12	1	5196
601	SCFD1	-0.721079	-0.721079	0.00444942	0.00977234	-0.98139	-1.48304	11207	2	SCFD1_4; SCFD1_2	4	23256	Q8WVM8	246	23256	9342	O95721	SCFD1	SNAP29	3.50262e-12	0.00499176	0.995008	1
602	RPTOR	-0.719633	-0.728803	0.00155184	0.00491644	-0.968514	-1.61466	3953	3	RPTOR_3; RPTOR_1; RPTOR_4	4	57521	Q8N122	247	57521	389541	Q0VGL1	RPTOR	LAMTOR4	1.16978e-09	0.0438799	0.95612	5	2	mTORC1 complex; mTOR complex (MTOR, RAPTOR)	3; 2	2; 1	2970; 2991
603	RPTOR	-0.719633	-0.728803	0.00155184	0.00491644	-0.968514	-1.61466	3953	3	RPTOR_3; RPTOR_1; RPTOR_4	4	57521	Q8N122	247	57521	10533	O95352	RPTOR	ATG7	7.10001e-06	0.0166595	0.983333	5	2	mTORC1 complex; mTOR complex (MTOR, RAPTOR)	3; 2	2; 1	2970; 2991
604	RPTOR	-0.719633	-0.728803	0.00155184	0.00491644	-0.968514	-1.61466	3953	3	RPTOR_3; RPTOR_1; RPTOR_4	4	57521	Q8N122	247	57521	8649	Q9UHA4	RPTOR	LAMTOR3	9.32165e-11	0.000994037	0.999006	5	2	mTORC1 complex; mTOR complex (MTOR, RAPTOR)	3; 2	2; 1	2970; 2991
605	RPTOR	-0.719633	-0.728803	0.00155184	0.00491644	-0.968514	-1.61466	3953	3	RPTOR_3; RPTOR_1; RPTOR_4	4	57521	Q8N122	247	57521	10542	O43504	RPTOR	LAMTOR5	3.31434e-11	0.00248066	0.997519	5	2	mTORC1 complex; mTOR complex (MTOR, RAPTOR)	3; 2	2; 1	2970; 2991
606	RPTOR	-0.719633	-0.728803	0.00155184	0.00491644	-0.968514	-1.61466	3953	3	RPTOR_3; RPTOR_1; RPTOR_4	4	57521	Q8N122	247	57521	10670	Q7L523	RPTOR	RRAGA	1.78559e-08	0.0200229	0.979977	5	2	mTORC1 complex; mTOR complex (MTOR, RAPTOR)	3; 2	2; 1	2970; 2991
607	RHBDF2	-0.719557	-0.692267	0.0011436	0.00409407	-0.947376	-1.70046	2954	4	RHBDF2_1; RHBDF2_3; RHBDF2_2; RHBDF2_4	4	79651	Q6PJF5	248	79651	26580	Q96G97	RHBDF2	BSCL2	9.77287e-10	0.000541802	0.999458	1
608	COMMD10	-0.71588	-0.526083	0.0010742	0.00396456	-0.972688	-1.62162	2736	3	COMMD10_3; COMMD10_4; COMMD10_2	4	51397	Q9Y6G5	250	51397	51122	Q86X83	COMMD10	COMMD2	4.56029e-22	9.89333e-13	1	9	2	CCC-Wash (WASH1, FAM21C) complex; CCC complex	15; 13	9; 9	6639; 6645
609	COMMD10	-0.71588	-0.526083	0.0010742	0.00396456	-0.972688	-1.62162	2736	3	COMMD10_3; COMMD10_4; COMMD10_2	4	51397	Q9Y6G5	250	51397	51699	Q9UBQ0	COMMD10	VPS29	7.75518e-26	6.69774e-08	1	9	2	CCC-Wash (WASH1, FAM21C) complex; CCC complex	15; 13	9; 9	6639; 6645
610	COMMD10	-0.71588	-0.526083	0.0010742	0.00396456	-0.972688	-1.62162	2736	3	COMMD10_3; COMMD10_4; COMMD10_2	4	51397	Q9Y6G5	250	51397	57020	Q7Z3J2	COMMD10	C16orf62	1.476e-10	7.31979e-07	0.999999	9	2	CCC-Wash (WASH1, FAM21C) complex; CCC complex	15; 13	9; 9	6639; 6645
611	COMMD10	-0.71588	-0.526083	0.0010742	0.00396456	-0.972688	-1.62162	2736	3	COMMD10_3; COMMD10_4; COMMD10_2	4	51397	Q9Y6G5	250	51397	54520	Q567U6	COMMD10	CCDC93	2.34662e-11	6.09142e-06	0.999994	9	2	CCC-Wash (WASH1, FAM21C) complex; CCC complex	15; 13	9; 9	6639; 6645
612	COMMD10	-0.71588	-0.526083	0.0010742	0.00396456	-0.972688	-1.62162	2736	3	COMMD10_3; COMMD10_4; COMMD10_2	4	51397	Q9Y6G5	250	51397	54939	Q9H0A8	COMMD10	COMMD4	2.11283e-22	8.4828e-12	1	9	2	CCC-Wash (WASH1, FAM21C) complex; CCC complex	15; 13	9; 9	6639; 6645
613	COMMD10	-0.71588	-0.526083	0.0010742	0.00396456	-0.972688	-1.62162	2736	3	COMMD10_3; COMMD10_4; COMMD10_2	4	51397	Q9Y6G5	250	51397	28952	O60826	COMMD10	CCDC22	2.26955e-23	2.60274e-11	1	9	2	CCC-Wash (WASH1, FAM21C) complex; CCC complex	15; 13	9; 9	6639; 6645
614	COMMD10	-0.71588	-0.526083	0.0010742	0.00396456	-0.972688	-1.62162	2736	3	COMMD10_3; COMMD10_4; COMMD10_2	4	51397	Q9Y6G5	250	51397	28991	Q9GZQ3	COMMD10	COMMD5	8.2843e-23	5.12074e-15	1	9	2	CCC-Wash (WASH1, FAM21C) complex; CCC complex	15; 13	9; 9	6639; 6645
615	COMMD10	-0.71588	-0.526083	0.0010742	0.00396456	-0.972688	-1.62162	2736	3	COMMD10_3; COMMD10_4; COMMD10_2	4	51397	Q9Y6G5	250	51397	54951	Q9NX08	COMMD10	COMMD8	1.30263e-21	1.42214e-14	1	9	2	CCC-Wash (WASH1, FAM21C) complex; CCC complex	15; 13	9; 9	6639; 6645
616	COMMD10	-0.71588	-0.526083	0.0010742	0.00396456	-0.972688	-1.62162	2736	3	COMMD10_3; COMMD10_4; COMMD10_2	4	51397	Q9Y6G5	250	51397	23412	Q9UBI1	COMMD10	COMMD3	7.16849e-20	3.22848e-13	1	9	2	CCC-Wash (WASH1, FAM21C) complex; CCC complex	15; 13	9; 9	6639; 6645
617	TMED2	-0.71328	-0.68284	0.00141329	0.0046848	-0.969593	-1.61646	3600	3	TMED2_2; TMED2_1; TMED2_3	4	10959	Q15363	253	10959	23065	Q8N766	TMED2	EMC1	2.76474e-23	5.5303e-05	0.999945	2
618	TMED2	-0.71328	-0.68284	0.00141329	0.0046848	-0.969593	-1.61646	3600	3	TMED2_2; TMED2_1; TMED2_3	4	10959	Q15363	253	10959	84061	Q9H0U3	TMED2	MAGT1	1.11676e-05	0.22158	0.778409	2
619	CTR9	-0.712926	-0.712926	0.0104129	0.0171395	-0.969721	-1.46541	26229	2	CTR9_1; CTR9_3	4	9646	Q6PD62	255	9646	80349	Q9GZS3	CTR9	WDR61	7.38394e-13	2.14106e-07	1	1	1	Paf complex	5	3	1167
620	RAB21	-0.710717	-0.703768	0.00509979	0.0107712	-0.949407	-1.58281	12993	3	RAB21_3; RAB21_2; RAB21_4	4	23011	Q9UL25	257	23011	27342	Q9UJ41	RAB21	RABGEF1	3.70152e-14	0.0153411	0.984659	1
621	TELO2	-0.708144	-0.708144	0.00363599	0.00873614	-0.98342	-1.48611	9158	2	TELO2_2; TELO2_3	4	9894	Q9Y4R8	260	9894	84191	Q9H5X1	TELO2	FAM96A	5.64797e-11	0.0720546	0.927945	1
622	PIK3R4	-0.707584	-0.707584	0.0651116	0.0667224	-0.911179	-1.37694	164014	2	PIK3R4_1; PIK3R4_2	4	30849	Q99570	261	30849	1937	P26641	PIK3R4	EEF1G	8.55052e-12	0.153335	0.846665	1	2	Phosphatidylinositol 3-kinase complex (PIK3C3, PIK3R4); Bcl-2-Beclin1-UVRAG-PI(3)KC3 complex	2; 5	1; 2	429; 6472
623	WDR92	-0.702425	-0.712257	0.00174258	0.00515572	-0.967066	-1.61225	4439	3	WDR92_4; WDR92_3; WDR92_2	4	116143	Q96MX6	262	116143	8409	Q9UBK9	WDR92	UXT	2.13108e-12	0.003428	0.996572	2
624	WDR92	-0.702425	-0.712257	0.00174258	0.00515572	-0.967066	-1.61225	4439	3	WDR92_4; WDR92_3; WDR92_2	4	116143	Q96MX6	262	116143	51184	Q9UHW5	WDR92	GPN3	5.05549e-08	0.13861	0.86139	2
625	C10orf32	-0.701704	-0.680581	0.000382661	0.00212391	-0.982142	-1.63738	974	3	C10orf32_1; C10orf32_2; C10orf32_3	4	119032	Q96B45	264	119032	3312	P11142	C10orf32	HSPA8	1.7776e-16	0.0673223	0.932678	13	1	BORC complex	8	8	7545
626	C10orf32	-0.701704	-0.680581	0.000382661	0.00212391	-0.982142	-1.63738	974	3	C10orf32_1; C10orf32_2; C10orf32_3	4	119032	Q96B45	264	119032	55004	Q6IAA8	C10orf32	LAMTOR1	8.37294e-27	0.000147158	0.999853	13	1	BORC complex	8	8	7545
627	C10orf32	-0.701704	-0.680581	0.000382661	0.00212391	-0.982142	-1.63738	974	3	C10orf32_1; C10orf32_2; C10orf32_3	4	119032	Q96B45	264	119032	282991	Q6QNY1	C10orf32	BLOC1S2	7.60929e-09	1.43092e-07	1	13	1	BORC complex	8	8	7545
628	C10orf32	-0.701704	-0.680581	0.000382661	0.00212391	-0.982142	-1.63738	974	3	C10orf32_1; C10orf32_2; C10orf32_3	4	119032	Q96B45	264	119032	2647	P78537	C10orf32	BLOC1S1	2.71649e-21	1.54997e-14	1	13	1	BORC complex	8	8	7545
629	C10orf32	-0.701704	-0.680581	0.000382661	0.00212391	-0.982142	-1.63738	974	3	C10orf32_1; C10orf32_2; C10orf32_3	4	119032	Q96B45	264	119032	8649	Q9UHA4	C10orf32	LAMTOR3	3.09285e-10	0.0254415	0.974558	13	1	BORC complex	8	8	7545
630	C10orf32	-0.701704	-0.680581	0.000382661	0.00212391	-0.982142	-1.63738	974	3	C10orf32_1; C10orf32_2; C10orf32_3	4	119032	Q96B45	264	119032	118426	Q969J3	C10orf32	LOH12CR1	6.12772e-12	3.79396e-08	1	13	1	BORC complex	8	8	7545
631	C10orf32	-0.701704	-0.680581	0.000382661	0.00212391	-0.982142	-1.63738	974	3	C10orf32_1; C10orf32_2; C10orf32_3	4	119032	Q96B45	264	119032	729991	Q96FH0	C10orf32	MEF2BNB	6.3113e-18	3.47832e-14	1	13	1	BORC complex	8	8	7545
632	C10orf32	-0.701704	-0.680581	0.000382661	0.00212391	-0.982142	-1.63738	974	3	C10orf32_1; C10orf32_2; C10orf32_3	4	119032	Q96B45	264	119032	54785	Q96GS4	C10orf32	C17orf59	8.38998e-19	1.11085e-15	1	13	1	BORC complex	8	8	7545
633	C10orf32	-0.701704	-0.680581	0.000382661	0.00212391	-0.982142	-1.63738	974	3	C10orf32_1; C10orf32_2; C10orf32_3	4	119032	Q96B45	264	119032	79036	Q9BQD3	C10orf32	KXD1	4.12678e-22	7.98661e-13	1	13	1	BORC complex	8	8	7545
634	C10orf32	-0.701704	-0.680581	0.000382661	0.00212391	-0.982142	-1.63738	974	3	C10orf32_1; C10orf32_2; C10orf32_3	4	119032	Q96B45	264	119032	23557	O95295	C10orf32	SNAPIN	6.4226e-12	7.74368e-06	0.999992	13	1	BORC complex	8	8	7545
635	C10orf32	-0.701704	-0.680581	0.000382661	0.00212391	-0.982142	-1.63738	974	3	C10orf32_1; C10orf32_2; C10orf32_3	4	119032	Q96B45	264	119032	389541	Q0VGL1	C10orf32	LAMTOR4	2.9298e-21	0.00078795	0.999212	13	1	BORC complex	8	8	7545
636	C10orf32	-0.701704	-0.680581	0.000382661	0.00212391	-0.982142	-1.63738	974	3	C10orf32_1; C10orf32_2; C10orf32_3	4	119032	Q96B45	264	119032	10542	O43504	C10orf32	LAMTOR5	1.16979e-09	0.000146306	0.999854	13	1	BORC complex	8	8	7545
637	C10orf32	-0.701704	-0.680581	0.000382661	0.00212391	-0.982142	-1.63738	974	3	C10orf32_1; C10orf32_2; C10orf32_3	4	119032	Q96B45	264	119032	55845	Q8WUW1	C10orf32	BRK1	3.09548e-06	0.0329859	0.967011	13	1	BORC complex	8	8	7545
638	TRAPPC2L	-0.700779	-0.700779	0.00381424	0.00887646	-0.982951	-1.4854	9607	2	TRAPPC2L_2; TRAPPC2L_1	4	51693	Q9UL33	265	51693	64223	Q9BVC4	TRAPPC2L	MLST8	4.45306e-09	0.00451582	0.995484	1	1	TRAPP complex	14	1	6468
639	RAB14	-0.696338	-0.772405	0.00092388	0.0035951	-0.974377	-1.62444	2353	3	RAB14_1; RAB14_2; RAB14_4	4	51552	P61106	266	51552	26747	Q9UHK0	RAB14	NUFIP1	9.19484e-09	0.210333	0.789667	2
640	RAB14	-0.696338	-0.772405	0.00092388	0.0035951	-0.974377	-1.62444	2353	3	RAB14_1; RAB14_2; RAB14_4	4	51552	P61106	266	51552	51009	Q9GZP9	RAB14	DERL2	1.29551e-10	0.115635	0.884365	2
641	KXD1	-0.695609	-0.543145	0.00167154	0.00509286	-0.967605	-1.61315	4258	3	KXD1_2; KXD1_1; KXD1_4	4	79036	Q9BQD3	267	79036	55737	Q96QK1	KXD1	VPS35	2.34234e-12	0.00764242	0.992358	16	1	BORC complex	8	8	7545
642	KXD1	-0.695609	-0.543145	0.00167154	0.00509286	-0.967605	-1.61315	4258	3	KXD1_2; KXD1_1; KXD1_4	4	79036	Q9BQD3	267	79036	80230	Q96T51	KXD1	RUFY1	0.000180464	0.0308348	0.968985	16	1	BORC complex	8	8	7545
643	KXD1	-0.695609	-0.543145	0.00167154	0.00509286	-0.967605	-1.61315	4258	3	KXD1_2; KXD1_1; KXD1_4	4	79036	Q9BQD3	267	79036	23265	Q9UPT5	KXD1	EXOC7	3.86467e-13	0.00122169	0.998778	16	1	BORC complex	8	8	7545
644	KXD1	-0.695609	-0.543145	0.00167154	0.00509286	-0.967605	-1.61315	4258	3	KXD1_2; KXD1_1; KXD1_4	4	79036	Q9BQD3	267	79036	58490	Q9NQG5	KXD1	RPRD1B	1.36006e-06	0.104917	0.895082	16	1	BORC complex	8	8	7545
645	KXD1	-0.695609	-0.543145	0.00167154	0.00509286	-0.967605	-1.61315	4258	3	KXD1_2; KXD1_1; KXD1_4	4	79036	Q9BQD3	267	79036	55763	Q9NV70	KXD1	EXOC1	4.26648e-13	4.24083e-06	0.999996	16	1	BORC complex	8	8	7545
646	KXD1	-0.695609	-0.543145	0.00167154	0.00509286	-0.967605	-1.61315	4258	3	KXD1_2; KXD1_1; KXD1_4	4	79036	Q9BQD3	267	79036	282991	Q6QNY1	KXD1	BLOC1S2	1.32691e-08	0.000745355	0.999255	16	1	BORC complex	8	8	7545
647	KXD1	-0.695609	-0.543145	0.00167154	0.00509286	-0.967605	-1.61315	4258	3	KXD1_2; KXD1_1; KXD1_4	4	79036	Q9BQD3	267	79036	6293	Q8N1B4	KXD1	VPS52	7.86105e-11	0.00281294	0.997187	16	1	BORC complex	8	8	7545
648	KXD1	-0.695609	-0.543145	0.00167154	0.00509286	-0.967605	-1.61315	4258	3	KXD1_2; KXD1_1; KXD1_4	4	79036	Q9BQD3	267	79036	118426	Q969J3	KXD1	LOH12CR1	1.20567e-13	3.6013e-07	1	16	1	BORC complex	8	8	7545
649	KXD1	-0.695609	-0.543145	0.00167154	0.00509286	-0.967605	-1.61315	4258	3	KXD1_2; KXD1_1; KXD1_4	4	79036	Q9BQD3	267	79036	54785	Q96GS4	KXD1	C17orf59	1.39302e-22	4.88636e-11	1	16	1	BORC complex	8	8	7545
650	KXD1	-0.695609	-0.543145	0.00167154	0.00509286	-0.967605	-1.61315	4258	3	KXD1_2; KXD1_1; KXD1_4	4	79036	Q9BQD3	267	79036	23557	O95295	KXD1	SNAPIN	2.40734e-14	0.000278613	0.999721	16	1	BORC complex	8	8	7545
651	KXD1	-0.695609	-0.543145	0.00167154	0.00509286	-0.967605	-1.61315	4258	3	KXD1_2; KXD1_1; KXD1_4	4	79036	Q9BQD3	267	79036	389541	Q0VGL1	KXD1	LAMTOR4	8.20551e-11	0.0173929	0.982607	16	1	BORC complex	8	8	7545
652	KXD1	-0.695609	-0.543145	0.00167154	0.00509286	-0.967605	-1.61315	4258	3	KXD1_2; KXD1_1; KXD1_4	4	79036	Q9BQD3	267	79036	119032	Q96B45	KXD1	C10orf32	4.12678e-22	7.98661e-13	1	16	1	BORC complex	8	8	7545
653	KXD1	-0.695609	-0.543145	0.00167154	0.00509286	-0.967605	-1.61315	4258	3	KXD1_2; KXD1_1; KXD1_4	4	79036	Q9BQD3	267	79036	729991	Q96FH0	KXD1	MEF2BNB	7.79584e-22	1.32959e-12	1	16	1	BORC complex	8	8	7545
654	KXD1	-0.695609	-0.543145	0.00167154	0.00509286	-0.967605	-1.61315	4258	3	KXD1_2; KXD1_1; KXD1_4	4	79036	Q9BQD3	267	79036	2647	P78537	KXD1	BLOC1S1	5.55296e-19	3.2339e-11	1	16	1	BORC complex	8	8	7545
655	KXD1	-0.695609	-0.543145	0.00167154	0.00509286	-0.967605	-1.61315	4258	3	KXD1_2; KXD1_1; KXD1_4	4	79036	Q9BQD3	267	79036	55004	Q6IAA8	KXD1	LAMTOR1	3.49761e-23	0.00224615	0.997754	16	1	BORC complex	8	8	7545
656	KXD1	-0.695609	-0.543145	0.00167154	0.00509286	-0.967605	-1.61315	4258	3	KXD1_2; KXD1_1; KXD1_4	4	79036	Q9BQD3	267	79036	10542	O43504	KXD1	LAMTOR5	3.67921e-06	0.00820223	0.991794	16	1	BORC complex	8	8	7545
657	WDR18	-0.692614	-0.491371	0.0124708	0.019369	-0.927772	-1.54674	31774	3	WDR18_3; WDR18_1; WDR18_2	4	57418	Q9BV38	270	57418	27043	Q8IZL8	WDR18	PELP1	1.69526e-16	0.00539686	0.994603	3	2	5FMC (Friends of Methylated Chtop) complex; LAS1L-PELP1-TEX10-WDR18-NOL9-SENP3 complex	5; 6	3; 3	6854; 6855
658	WDR18	-0.692614	-0.491371	0.0124708	0.019369	-0.927772	-1.54674	31774	3	WDR18_3; WDR18_1; WDR18_2	4	57418	Q9BV38	270	57418	3312	P11142	WDR18	HSPA8	1.6707e-15	0.236151	0.763849	3	2	5FMC (Friends of Methylated Chtop) complex; LAS1L-PELP1-TEX10-WDR18-NOL9-SENP3 complex	5; 6	3; 3	6854; 6855
659	WDR18	-0.692614	-0.491371	0.0124708	0.019369	-0.927772	-1.54674	31774	3	WDR18_3; WDR18_1; WDR18_2	4	57418	Q9BV38	270	57418	54881	Q9NXF1	WDR18	TEX10	2.36633e-12	1.20827e-07	1	3	2	5FMC (Friends of Methylated Chtop) complex; LAS1L-PELP1-TEX10-WDR18-NOL9-SENP3 complex	5; 6	3; 3	6854; 6855
660	SSB	-0.691113	-0.691113	0.0109612	0.0178005	-0.968827	-1.46406	27610	2	SSB_4; SSB_1	4	6741	P05455	272	6741	6223	P39019	SSB	RPS19	1.71811e-15	0.215814	0.784186	3	2	H2AX complex, isolated from cells without IR exposure; Emerin complex 25	14; 16	1; 1	1223; 5613
661	SSB	-0.691113	-0.691113	0.0109612	0.0178005	-0.968827	-1.46406	27610	2	SSB_4; SSB_1	4	6741	P05455	272	6741	3921	P08865	SSB	RPSA	2.25679e-13	0.0933037	0.906696	3	2	H2AX complex, isolated from cells without IR exposure; Emerin complex 25	14; 16	1; 1	1223; 5613
662	SSB	-0.691113	-0.691113	0.0109612	0.0178005	-0.968827	-1.46406	27610	2	SSB_4; SSB_1	4	6741	P05455	272	6741	11103	Q13601	SSB	KRR1	3.53973e-15	0.14053	0.85947	3	2	H2AX complex, isolated from cells without IR exposure; Emerin complex 25	14; 16	1; 1	1223; 5613
663	PPP2R4	-0.690408	-0.690408	0.00569675	0.0116207	-0.978607	-1.47884	14349	2	PPP2R4_1; PPP2R4_4	4	5524	Q15257	273	5524	55671	Q6IN85	PPP2R4	SMEK1	6.86803e-11	0.0640564	0.935944	1
664	IPO7	-0.689056	-0.689056	0.0118314	0.0187694	-0.967379	-1.46187	29802	2	IPO7_4; IPO7_3	4	10527	O95373	275	10527	7095	Q99442	IPO7	SEC62	3.61123e-14	0.0159394	0.984061	1
665	GCN1L1	-0.68255	-0.667917	0.000325752	0.00189625	-0.983249	-1.63923	829	3	GCN1L1_2; GCN1L1_4; GCN1L1_1	4	10985	Q92616	278	10985	84191	Q9H5X1	GCN1L1	FAM96A	7.62331e-12	0.0520528	0.947947	1	2	CDC5L core complex; CDC5L complex	6; 30	2; 5	1182; 1183
666	GNL3	-0.680252	-0.680252	0.0149779	0.021729	-0.962567	-1.4546	37728	2	GNL3_4; GNL3_2	4	26354	Q9BVP2	280	26354	63977	P57071	GNL3	PRDM15	5.27907e-06	0.198098	0.801897	1	1	Nop56p-associated pre-rRNA complex	105	6	3055
667	PHF6	-0.680225	-0.680225	0.00414096	0.00935308	-0.982156	-1.4842	10430	2	PHF6_3; PHF6_4	4	84295	Q8IWS0	281	84295	1616	Q9UER7	PHF6	DAXX	0.146291	0.0965702	0.757139	1
668	PNISR	-0.676984	-0.638322	0.000545929	0.0026059	-0.979359	-1.63275	1390	3	PNISR_4; PNISR_3; PNISR_2	4	25957	Q8TF01	282	25957	5305	P48426	PNISR	PIP4K2A	2.50902e-08	7.43773e-07	0.999999	1
669	TRAF2	-0.674874	-0.54023	0.000886203	0.00350564	-0.974718	-1.62501	2257	3	TRAF2_1; TRAF2_3; TRAF2_2	4	7186	Q12933	283	7186	329	Q13490	TRAF2	BIRC2	4.59414e-22	5.31832e-11	1	2	9	TRAF2-MALT1 complex; TANK-TRAF2-TRAF3 complex; Kinase maturation complex 2; TRAF2-cIAP1/BIRC2 complex; Tumor necrosis factor receptor 1 signaling complex; TRAF2-TRADD complex; Ternary complex (TRAF2, FADD, TRADD); TNF-R1-associated signaling complex; TNF-R1 signaling complex	2; 3; 8; 2; 4; 2; 3; 15; 5	1; 2; 1; 2; 2; 1; 1; 2; 1	2744; 5210; 5212; 5529; 5531; 5540; 5541; 6344; 6347
670	TRAF2	-0.674874	-0.54023	0.000886203	0.00350564	-0.974718	-1.62501	2257	3	TRAF2_1; TRAF2_3; TRAF2_2	4	7186	Q12933	283	7186	27342	Q9UJ41	TRAF2	RABGEF1	2.43191e-08	0.0311671	0.968833	2	9	TRAF2-MALT1 complex; TANK-TRAF2-TRAF3 complex; Kinase maturation complex 2; TRAF2-cIAP1/BIRC2 complex; Tumor necrosis factor receptor 1 signaling complex; TRAF2-TRADD complex; Ternary complex (TRAF2, FADD, TRADD); TNF-R1-associated signaling complex; TNF-R1 signaling complex	2; 3; 8; 2; 4; 2; 3; 15; 5	1; 2; 1; 2; 2; 1; 1; 2; 1	2744; 5210; 5212; 5529; 5531; 5540; 5541; 6344; 6347
671	KRR1	-0.674742	-0.674742	0.00542044	0.0112608	-0.979218	-1.47976	13653	2	KRR1_3; KRR1_4	4	11103	Q13601	284	11103	6741	P05455	KRR1	SSB	3.53973e-15	0.14053	0.85947	20
672	KRR1	-0.674742	-0.674742	0.00542044	0.0112608	-0.979218	-1.47976	13653	2	KRR1_3; KRR1_4	4	11103	Q13601	284	11103	65095	Q8N9T8	KRR1	KRI1	9.7789e-12	0.000416378	0.999584	20
673	KRR1	-0.674742	-0.674742	0.00542044	0.0112608	-0.979218	-1.47976	13653	2	KRR1_3; KRR1_4	4	11103	Q13601	284	11103	55922	O15226	KRR1	NKRF	8.58036e-10	0.0569389	0.943061	20
674	KRR1	-0.674742	-0.674742	0.00542044	0.0112608	-0.979218	-1.47976	13653	2	KRR1_3; KRR1_4	4	11103	Q13601	284	11103	10664	P49711	KRR1	CTCF	3.66519e-09	0.00634311	0.993657	20
675	KRR1	-0.674742	-0.674742	0.00542044	0.0112608	-0.979218	-1.47976	13653	2	KRR1_3; KRR1_4	4	11103	Q13601	284	11103	79050	Q9BVI4	KRR1	NOC4L	2.99983e-13	0.00143848	0.998562	20
676	KRR1	-0.674742	-0.674742	0.00542044	0.0112608	-0.979218	-1.47976	13653	2	KRR1_3; KRR1_4	4	11103	Q13601	284	11103	114034	Q96GM8	KRR1	TOE1	1.97639e-09	0.00893142	0.991069	20
677	KRR1	-0.674742	-0.674742	0.00542044	0.0112608	-0.979218	-1.47976	13653	2	KRR1_3; KRR1_4	4	11103	Q13601	284	11103	8467	O60264	KRR1	SMARCA5	1.41112e-15	0.161015	0.838985	20
678	KRR1	-0.674742	-0.674742	0.00542044	0.0112608	-0.979218	-1.47976	13653	2	KRR1_3; KRR1_4	4	11103	Q13601	284	11103	1662	Q13206	KRR1	DDX10	5.05091e-09	0.0710407	0.928959	20
679	KRR1	-0.674742	-0.674742	0.00542044	0.0112608	-0.979218	-1.47976	13653	2	KRR1_3; KRR1_4	4	11103	Q13601	284	11103	641	P54132	KRR1	BLM	0.000633612	0.185766	0.8136	20
680	KRR1	-0.674742	-0.674742	0.00542044	0.0112608	-0.979218	-1.47976	13653	2	KRR1_3; KRR1_4	4	11103	Q13601	284	11103	26574	Q9NY61	KRR1	AATF	2.14469e-12	0.00528334	0.994717	20
681	KRR1	-0.674742	-0.674742	0.00542044	0.0112608	-0.979218	-1.47976	13653	2	KRR1_3; KRR1_4	4	11103	Q13601	284	11103	51491	Q9Y3C1	KRR1	NOP16	8.46318e-13	0.219766	0.780234	20
682	KRR1	-0.674742	-0.674742	0.00542044	0.0112608	-0.979218	-1.47976	13653	2	KRR1_3; KRR1_4	4	11103	Q13601	284	11103	84294	Q9BRU9	KRR1	UTP23	5.93898e-05	0.00300413	0.996936	20
683	KRR1	-0.674742	-0.674742	0.00542044	0.0112608	-0.979218	-1.47976	13653	2	KRR1_3; KRR1_4	4	11103	Q13601	284	11103	57696	Q8NHQ9	KRR1	DDX55	7.56707e-05	2.66628e-05	0.999898	20
684	KRR1	-0.674742	-0.674742	0.00542044	0.0112608	-0.979218	-1.47976	13653	2	KRR1_3; KRR1_4	4	11103	Q13601	284	11103	170506	Q9H2U1	KRR1	DHX36	0.0897251	0.0308502	0.879425	20
685	KRR1	-0.674742	-0.674742	0.00542044	0.0112608	-0.979218	-1.47976	13653	2	KRR1_3; KRR1_4	4	11103	Q13601	284	11103	1616	Q9UER7	KRR1	DAXX	3.80731e-12	0.207523	0.792477	20
686	KRR1	-0.674742	-0.674742	0.00542044	0.0112608	-0.979218	-1.47976	13653	2	KRR1_3; KRR1_4	4	11103	Q13601	284	11103	6223	P39019	KRR1	RPS19	7.2991e-32	0.0849374	0.915063	20
687	KRR1	-0.674742	-0.674742	0.00542044	0.0112608	-0.979218	-1.47976	13653	2	KRR1_3; KRR1_4	4	11103	Q13601	284	11103	6208	P62263	KRR1	RPS14	1.4143e-27	0.000857743	0.999142	20
688	KRR1	-0.674742	-0.674742	0.00542044	0.0112608	-0.979218	-1.47976	13653	2	KRR1_3; KRR1_4	4	11103	Q13601	284	11103	3921	P08865	KRR1	RPSA	6.7146e-34	0.181065	0.818935	20
689	KRR1	-0.674742	-0.674742	0.00542044	0.0112608	-0.979218	-1.47976	13653	2	KRR1_3; KRR1_4	4	11103	Q13601	284	11103	6426	Q07955	KRR1	SRSF1	6.1688e-08	0.0777804	0.92222	20
690	KRR1	-0.674742	-0.674742	0.00542044	0.0112608	-0.979218	-1.47976	13653	2	KRR1_3; KRR1_4	4	11103	Q13601	284	11103	23144	Q8IXZ2	KRR1	ZC3H3	6.60385e-06	0.0275067	0.972487	20
691	P4HA1	-0.673533	-0.673533	0.00585673	0.0118794	-0.978281	-1.47834	14752	2	P4HA1_1; P4HA1_2	4	5033	P13674	286	5033	56252	P49750	P4HA1	YLPM1	7.30961e-15	0.000103667	0.999896	5	1	Prolyl 4-hydroxylase (alpha(I)-type)	2	2	472
692	P4HA1	-0.673533	-0.673533	0.00585673	0.0118794	-0.978281	-1.47834	14752	2	P4HA1_1; P4HA1_2	4	5033	P13674	286	5033	10898	O95639	P4HA1	CPSF4	8.768e-26	1.7932e-07	1	5	1	Prolyl 4-hydroxylase (alpha(I)-type)	2	2	472
693	P4HA1	-0.673533	-0.673533	0.00585673	0.0118794	-0.978281	-1.47834	14752	2	P4HA1_1; P4HA1_2	4	5033	P13674	286	5033	54881	Q9NXF1	P4HA1	TEX10	6.89294e-32	0.0901887	0.909811	5	1	Prolyl 4-hydroxylase (alpha(I)-type)	2	2	472
694	P4HA1	-0.673533	-0.673533	0.00585673	0.0118794	-0.978281	-1.47834	14752	2	P4HA1_1; P4HA1_2	4	5033	P13674	286	5033	51763	Q9BT40	P4HA1	INPP5K	5.08243e-28	0.16315	0.83685	5	1	Prolyl 4-hydroxylase (alpha(I)-type)	2	2	472
695	P4HA1	-0.673533	-0.673533	0.00585673	0.0118794	-0.978281	-1.47834	14752	2	P4HA1_1; P4HA1_2	4	5033	P13674	286	5033	5034	P07237	P4HA1	P4HB	6.2588e-30	0.162173	0.837827	5	1	Prolyl 4-hydroxylase (alpha(I)-type)	2	2	472
696	C1orf109	-0.671894	-0.671894	0.00407943	0.0092726	-0.982312	-1.48443	10275	2	C1orf109_1; C1orf109_2	4	54955	Q9NX04	287	54955	51550	Q9BW66	C1orf109	CINP	2.95074e-09	2.6755e-09	1	2
697	C1orf109	-0.671894	-0.671894	0.00407943	0.0092726	-0.982312	-1.48443	10275	2	C1orf109_1; C1orf109_2	4	54955	Q9NX04	287	54955	79029	Q9BVQ7	C1orf109	SPATA5L1	0.0329762	1.89249e-07	0.967024	2
698	THOC5	-0.670519	-0.670519	0.00821999	0.014825	-0.973525	-1.47116	20705	2	THOC5_3; THOC5_1	4	8563	Q13769	288	8563	84321	Q96J01	THOC5	THOC3	9.65157e-15	0.000648247	0.999352	2	4	Spliceosome; TREX complex; THO complex; hTREX84 complex	143; 8; 5; 6	9; 3; 2; 3	351; 770; 774; 6160
699	THOC5	-0.670519	-0.670519	0.00821999	0.014825	-0.973525	-1.47116	20705	2	THOC5_3; THOC5_1	4	8563	Q13769	288	8563	9984	Q96FV9	THOC5	THOC1	4.32754e-13	3.67269e-05	0.999963	2	4	Spliceosome; TREX complex; THO complex; hTREX84 complex	143; 8; 5; 6	9; 3; 2; 3	351; 770; 774; 6160
700	CERS2	-0.670022	-0.670022	0.00398097	0.0091652	-0.982568	-1.48482	10027	2	CERS2_3; CERS2_1	4	29956	Q96G23	290	29956	7094	Q9Y490	CERS2	TLN1	2.24584e-12	0.108333	0.891667	6
701	CERS2	-0.670022	-0.670022	0.00398097	0.0091652	-0.982568	-1.48482	10027	2	CERS2_3; CERS2_1	4	29956	Q96G23	290	29956	329	Q13490	CERS2	BIRC2	2.37813e-06	0.0270796	0.972918	6
702	CERS2	-0.670022	-0.670022	0.00398097	0.0091652	-0.982568	-1.48482	10027	2	CERS2_3; CERS2_1	4	29956	Q96G23	290	29956	55004	Q6IAA8	CERS2	LAMTOR1	2.47104e-14	0.179353	0.820647	6
703	CERS2	-0.670022	-0.670022	0.00398097	0.0091652	-0.982568	-1.48482	10027	2	CERS2_3; CERS2_1	4	29956	Q96G23	290	29956	4067	P07948	CERS2	LYN	6.01827e-10	0.0402188	0.959781	6
704	CERS2	-0.670022	-0.670022	0.00398097	0.0091652	-0.982568	-1.48482	10027	2	CERS2_3; CERS2_1	4	29956	Q96G23	290	29956	8773	O00161	CERS2	SNAP23	1.6453e-15	0.0733155	0.926684	6
705	CERS2	-0.670022	-0.670022	0.00398097	0.0091652	-0.982568	-1.48482	10027	2	CERS2_3; CERS2_1	4	29956	Q96G23	290	29956	2531	Q06136	CERS2	KDSR	3.22498e-11	0.023483	0.976517	6
706	PWP2	-0.66948	-0.57524	0.00101533	0.00382618	-0.973326	-1.62269	2586	3	PWP2_4; PWP2_1; PWP2_3	4	5822	Q15269	292	5822	134430	Q8NI36	PWP2	WDR36	4.23079e-19	2.20775e-11	1	3
707	PWP2	-0.66948	-0.57524	0.00101533	0.00382618	-0.973326	-1.62269	2586	3	PWP2_4; PWP2_1; PWP2_3	4	5822	Q15269	292	5822	56915	Q9NQT4	PWP2	EXOSC5	0.00573381	0.133873	0.860394	3
708	PWP2	-0.66948	-0.57524	0.00101533	0.00382618	-0.973326	-1.62269	2586	3	PWP2_4; PWP2_1; PWP2_3	4	5822	Q15269	292	5822	5936	Q9BWF3	PWP2	RBM4	0.00186859	0.0772454	0.920886	3
709	CLPP	-0.666332	-0.729709	0.00171824	0.00510482	-0.967236	-1.61253	4377	3	CLPP_2; CLPP_4; CLPP_1	4	8192	Q16740	293	8192	25976	Q7Z3E1	CLPP	TIPARP	2.57134e-08	0.144991	0.855009	1	2	ClpXP complex	2	1	3992
710	CDKN1A	-0.665633	-0.593234	0.00121666	0.00418826	-0.971282	-1.61928	3099	3	CDKN1A_2; CDKN1A_1; CDKN1A_3	4	1026	P38936	294	1026	1387	Q92793	CDKN1A	CREBBP	2.31077e-07	0.0218383	0.978161	1	8	Cell cycle kinase complex CDC2; Cell cycle kinase complex CDK2; Cell cycle kinase complex CDK4; Cell cycle kinase complex CDK5; PCNA-p21 complex; CyclinD1-CDK4-p21 complex; CyclinD3-CDK4-CDK6-p21 complex; HSP90-CIP1-FKBPL complex	6; 4; 4; 5; 2; 3; 4; 3	1; 1; 1; 1; 1; 1; 1; 1	310; 311; 312; 313; 314; 1634; 5101; 5622
711	HECTD1	-0.665127	-0.642658	0.000273998	0.00175163	-0.966171	-1.7342	707	4	HECTD1_4; HECTD1_3; HECTD1_1; HECTD1_2	4	25831	Q9ULT8	295	25831	51550	Q9BW66	HECTD1	CINP	4.11111e-11	0.131968	0.868032	1
712	PPP2R3C	-0.663433	-0.741111	0.00135089	0.00453459	-0.970104	-1.61732	3441	3	PPP2R3C_2; PPP2R3C_4; PPP2R3C_3	4	55012	Q969Q6	298	55012	5518	P30153	PPP2R3C	PPP2R1A	8.43185e-09	6.12714e-06	0.999994	1	1	ABCB1-PPP2R3C-TFPI2 complex	3	1	7256
713	MED18	-0.661516	-0.661516	0.00652883	0.0126001	-0.976861	-1.4762	16445	2	MED18_2; MED18_4	4	54797	Q9BUE0	300	54797	9441	O95402	MED18	MED26	1.31689e-11	2.37413e-07	1	2	5	Mediator complex; TRAP-SMCC mediator complex; CRSP-Mediator 2 complex; Mediator complex; MED18-MED20-MED29 mediator subcomplex	59; 10; 10; 59; 3	6; 1; 2; 6; 1	230; 867; 910; 5450; 5451
714	MED18	-0.661516	-0.661516	0.00652883	0.0126001	-0.976861	-1.4762	16445	2	MED18_2; MED18_4	4	54797	Q9BUE0	300	54797	10025	Q9Y2X0	MED18	MED16	5.38107e-13	1.74594e-06	0.999998	2	5	Mediator complex; TRAP-SMCC mediator complex; CRSP-Mediator 2 complex; Mediator complex; MED18-MED20-MED29 mediator subcomplex	59; 10; 10; 59; 3	6; 1; 2; 6; 1	230; 867; 910; 5450; 5451
715	FOSL2	-0.656117	-0.503076	0.00886085	0.0155499	-0.937042	-1.5622	22576	3	FOSL2_3; FOSL2_1; FOSL2_2	4	2355	P15408	303	2355	3725	P05412	FOSL2	JUN	4.33185e-13	8.53001e-06	0.999991	5
716	FOSL2	-0.656117	-0.503076	0.00886085	0.0155499	-0.937042	-1.5622	22576	3	FOSL2_3; FOSL2_1; FOSL2_2	4	2355	P15408	303	2355	80204	Q86XK2	FOSL2	FBXO11	1.01605e-08	0.113361	0.886639	5
717	FOSL2	-0.656117	-0.503076	0.00886085	0.0155499	-0.937042	-1.5622	22576	3	FOSL2_3; FOSL2_1; FOSL2_2	4	2355	P15408	303	2355	7392	Q15853	FOSL2	USF2	0.000700148	0.000934082	0.998366	5
718	FOSL2	-0.656117	-0.503076	0.00886085	0.0155499	-0.937042	-1.5622	22576	3	FOSL2_3; FOSL2_1; FOSL2_2	4	2355	P15408	303	2355	80230	Q96T51	FOSL2	RUFY1	0.000464079	0.0345191	0.965017	5
719	FOSL2	-0.656117	-0.503076	0.00886085	0.0155499	-0.937042	-1.5622	22576	3	FOSL2_3; FOSL2_1; FOSL2_2	4	2355	P15408	303	2355	3726	P17275	FOSL2	JUNB	7.19617e-12	4.36153e-12	1	5
720	BRD2	-0.655915	-0.627507	8.97848e-05	0.000827731	-0.975555	-1.75104	231	4	BRD2_4; BRD2_1; BRD2_2; BRD2_3	4	6046	P25440	305	6046	84294	Q9BRU9	BRD2	UTP23	2.35558e-11	0.000937863	0.999062	2
721	BRD2	-0.655915	-0.627507	8.97848e-05	0.000827731	-0.975555	-1.75104	231	4	BRD2_4; BRD2_1; BRD2_2; BRD2_3	4	6046	P25440	305	6046	5305	P48426	BRD2	PIP4K2A	3.18976e-11	3.56552e-06	0.999996	2
722	TSEN15	-0.655322	-0.655322	0.00479916	0.0103341	-0.980637	-1.4819	12088	2	TSEN15_4; TSEN15_3	4	116461	Q8WW01	307	116461	80746	Q8NCE0	TSEN15	TSEN2	1.63716e-27	1.85486e-08	1	3	1	tRNA splicing endonuclease	5	3	5283
723	TSEN15	-0.655322	-0.655322	0.00479916	0.0103341	-0.980637	-1.4819	12088	2	TSEN15_4; TSEN15_3	4	116461	Q8WW01	307	116461	283989	Q7Z6J9	TSEN15	TSEN54	4.5711e-16	0.000596443	0.999404	3	1	tRNA splicing endonuclease	5	3	5283
724	TSEN15	-0.655322	-0.655322	0.00479916	0.0103341	-0.980637	-1.4819	12088	2	TSEN15_4; TSEN15_3	4	116461	Q8WW01	307	116461	10542	O43504	TSEN15	LAMTOR5	0.000487916	0.162136	0.837376	3	1	tRNA splicing endonuclease	5	3	5283
725	ARID2	-0.654855	-0.642504	0.000592889	0.00273877	-0.957285	-1.71825	1531	4	ARID2_4; ARID2_2; ARID2_1; ARID2_3	4	196528	Q68CP9	308	196528	6598	Q12824	ARID2	SMARCB1	1.19744e-12	3.20431e-05	0.999968	2	2	PBAF complex (Polybromo- and BAF containing complex); PBAF complex (Polybromo- and BAF containing complex)	19; 19	8; 8	149; 556
726	ARID2	-0.654855	-0.642504	0.000592889	0.00273877	-0.957285	-1.71825	1531	4	ARID2_4; ARID2_2; ARID2_1; ARID2_3	4	196528	Q68CP9	308	196528	6601	Q8TAQ2	ARID2	SMARCC2	8.977e-13	9.88755e-06	0.99999	2	2	PBAF complex (Polybromo- and BAF containing complex); PBAF complex (Polybromo- and BAF containing complex)	19; 19	8; 8	149; 556
727	RSU1	-0.654583	-0.654583	0.0064014	0.0124549	-0.977117	-1.47658	16124	2	RSU1_1; RSU1_4	4	6251	Q15404	309	6251	10910	Q9Y2Z0	RSU1	SUGT1	8.56018e-26	0.24383	0.75617	3
728	RSU1	-0.654583	-0.654583	0.0064014	0.0124549	-0.977117	-1.47658	16124	2	RSU1_1; RSU1_4	4	6251	Q15404	309	6251	3611	Q13418	RSU1	ILK	3.94153e-30	2.66883e-08	1	3
729	RSU1	-0.654583	-0.654583	0.0064014	0.0124549	-0.977117	-1.47658	16124	2	RSU1_1; RSU1_4	4	6251	Q15404	309	6251	3987	P48059	RSU1	LIMS1	2.87078e-22	2.82907e-11	1	3
730	TGFBRAP1	-0.654389	-0.64863	7.31437e-05	0.000758998	-0.977017	-1.75367	188	4	TGFBRAP1_3; TGFBRAP1_1; TGFBRAP1_2; TGFBRAP1_4	4	9392	Q8WUH2	310	9392	64601	Q9H269	TGFBRAP1	VPS16	1.81369e-16	2.96902e-05	0.99997	5	1	CORVET complex	6	5	6388
731	TGFBRAP1	-0.654389	-0.64863	7.31437e-05	0.000758998	-0.977017	-1.75367	188	4	TGFBRAP1_3; TGFBRAP1_1; TGFBRAP1_2; TGFBRAP1_4	4	9392	Q8WUH2	310	9392	65082	Q96AX1	TGFBRAP1	VPS33A	3.08684e-12	0.000889743	0.99911	5	1	CORVET complex	6	5	6388
732	TGFBRAP1	-0.654389	-0.64863	7.31437e-05	0.000758998	-0.977017	-1.75367	188	4	TGFBRAP1_3; TGFBRAP1_1; TGFBRAP1_2; TGFBRAP1_4	4	9392	Q8WUH2	310	9392	27072	P49754	TGFBRAP1	VPS41	3.26597e-18	1.82328e-12	1	5	1	CORVET complex	6	5	6388
733	TGFBRAP1	-0.654389	-0.64863	7.31437e-05	0.000758998	-0.977017	-1.75367	188	4	TGFBRAP1_3; TGFBRAP1_1; TGFBRAP1_2; TGFBRAP1_4	4	9392	Q8WUH2	310	9392	57617	Q9P253	TGFBRAP1	VPS18	1.94701e-11	9.80787e-07	0.999999	5	1	CORVET complex	6	5	6388
734	TGFBRAP1	-0.654389	-0.64863	7.31437e-05	0.000758998	-0.977017	-1.75367	188	4	TGFBRAP1_3; TGFBRAP1_1; TGFBRAP1_2; TGFBRAP1_4	4	9392	Q8WUH2	310	9392	23355	Q8N3P4	TGFBRAP1	VPS8	3.97712e-05	0.00104644	0.998914	5	1	CORVET complex	6	5	6388
735	LEO1	-0.651336	-0.651336	0.0040306	0.00919079	-0.98244	-1.48463	10152	2	LEO1_4; LEO1_2	4	123169	Q8WVC0	311	123169	80349	Q9GZS3	LEO1	WDR61	1.24218e-11	2.24073e-08	1	1	1	Paf complex	5	3	1167
736	PELP1	-0.649904	-0.696242	0.0015484	0.00491644	-0.942493	-1.6917	4000	4	PELP1_2; PELP1_3; PELP1_4; PELP1_1	4	27043	Q8IZL8	313	27043	54881	Q9NXF1	PELP1	TEX10	9.30554e-16	0.0309377	0.969062	2	3	MLL1-WDR5 complex; 5FMC (Friends of Methylated Chtop) complex; LAS1L-PELP1-TEX10-WDR18-NOL9-SENP3 complex	27; 5; 6	5; 3; 3	5386; 6854; 6855
737	PELP1	-0.649904	-0.696242	0.0015484	0.00491644	-0.942493	-1.6917	4000	4	PELP1_2; PELP1_3; PELP1_4; PELP1_1	4	27043	Q8IZL8	313	27043	57418	Q9BV38	PELP1	WDR18	1.69526e-16	0.00539686	0.994603	2	3	MLL1-WDR5 complex; 5FMC (Friends of Methylated Chtop) complex; LAS1L-PELP1-TEX10-WDR18-NOL9-SENP3 complex	27; 5; 6	5; 3; 3	5386; 6854; 6855
738	ATP6AP1	-0.648337	-0.648337	0.00756417	0.0140309	-0.97476	-1.47302	19053	2	ATP6AP1_2; ATP6AP1_3	4	537	Q15904	316	537	10159	O75787	ATP6AP1	ATP6AP2	1.98857e-12	0.0154841	0.984516	1
739	OSBPL8	-0.645875	-0.609045	0.00264409	0.00701173	-0.960948	-1.60205	6736	3	OSBPL8_3; OSBPL8_4; OSBPL8_2	4	114882	Q9BZF1	317	114882	7095	Q99442	OSBPL8	SEC62	4.46838e-11	0.0366719	0.963328	2
740	OSBPL8	-0.645875	-0.609045	0.00264409	0.00701173	-0.960948	-1.60205	6736	3	OSBPL8_3; OSBPL8_4; OSBPL8_2	4	114882	Q9BZF1	317	114882	84191	Q9H5X1	OSBPL8	FAM96A	2.49628e-13	0.0546138	0.945386	2
741	PBRM1	-0.644058	-0.665778	0.000669558	0.00297107	-0.977585	-1.62979	1705	3	PBRM1_3; PBRM1_2; PBRM1_1	4	55193	Q86U86	318	55193	6598	Q12824	PBRM1	SMARCB1	7.8921e-16	3.18101e-05	0.999968	2	2	PBAF complex (Polybromo- and BAF containing complex); PBAF complex (Polybromo- and BAF containing complex)	19; 19	8; 8	149; 556
742	PBRM1	-0.644058	-0.665778	0.000669558	0.00297107	-0.977585	-1.62979	1705	3	PBRM1_3; PBRM1_2; PBRM1_1	4	55193	Q86U86	318	55193	6601	Q8TAQ2	PBRM1	SMARCC2	1.94024e-15	1.01262e-05	0.99999	2	2	PBAF complex (Polybromo- and BAF containing complex); PBAF complex (Polybromo- and BAF containing complex)	19; 19	8; 8	149; 556
743	UTP23	-0.641572	-0.631907	0.0019031	0.0055391	-0.965845	-1.61022	4848	3	UTP23_2; UTP23_1; UTP23_4	4	84294	Q9BRU9	320	84294	65095	Q8N9T8	UTP23	KRI1	8.31976e-11	0.00253443	0.997466	11
744	UTP23	-0.641572	-0.631907	0.0019031	0.0055391	-0.965845	-1.61022	4848	3	UTP23_2; UTP23_1; UTP23_4	4	84294	Q9BRU9	320	84294	6046	P25440	UTP23	BRD2	2.35558e-11	0.000937863	0.999062	11
745	UTP23	-0.641572	-0.631907	0.0019031	0.0055391	-0.965845	-1.61022	4848	3	UTP23_2; UTP23_1; UTP23_4	4	84294	Q9BRU9	320	84294	10664	P49711	UTP23	CTCF	6.68408e-08	0.038173	0.961827	11
746	UTP23	-0.641572	-0.631907	0.0019031	0.0055391	-0.965845	-1.61022	4848	3	UTP23_2; UTP23_1; UTP23_4	4	84294	Q9BRU9	320	84294	8467	O60264	UTP23	SMARCA5	1.1392e-13	0.187083	0.812917	11
747	UTP23	-0.641572	-0.631907	0.0019031	0.0055391	-0.965845	-1.61022	4848	3	UTP23_2; UTP23_1; UTP23_4	4	84294	Q9BRU9	320	84294	11103	Q13601	UTP23	KRR1	3.94683e-17	0.000159242	0.999841	11
748	UTP23	-0.641572	-0.631907	0.0019031	0.0055391	-0.965845	-1.61022	4848	3	UTP23_2; UTP23_1; UTP23_4	4	84294	Q9BRU9	320	84294	1616	Q9UER7	UTP23	DAXX	0.000111568	0.0922101	0.907678	11
749	UTP23	-0.641572	-0.631907	0.0019031	0.0055391	-0.965845	-1.61022	4848	3	UTP23_2; UTP23_1; UTP23_4	4	84294	Q9BRU9	320	84294	114034	Q96GM8	UTP23	TOE1	5.9686e-09	0.020789	0.979211	11
750	UTP23	-0.641572	-0.631907	0.0019031	0.0055391	-0.965845	-1.61022	4848	3	UTP23_2; UTP23_1; UTP23_4	4	84294	Q9BRU9	320	84294	57696	Q8NHQ9	UTP23	DDX55	4.44881e-05	0.0178526	0.982103	11
751	UTP23	-0.641572	-0.631907	0.0019031	0.0055391	-0.965845	-1.61022	4848	3	UTP23_2; UTP23_1; UTP23_4	4	84294	Q9BRU9	320	84294	6223	P39019	UTP23	RPS19	5.86662e-23	0.0840122	0.915988	11
752	UTP23	-0.641572	-0.631907	0.0019031	0.0055391	-0.965845	-1.61022	4848	3	UTP23_2; UTP23_1; UTP23_4	4	84294	Q9BRU9	320	84294	23144	Q8IXZ2	UTP23	ZC3H3	0.0498881	0.00564856	0.944463	11
753	UTP23	-0.641572	-0.631907	0.0019031	0.0055391	-0.965845	-1.61022	4848	3	UTP23_2; UTP23_1; UTP23_4	4	84294	Q9BRU9	320	84294	3921	P08865	UTP23	RPSA	0.151684	0.0297299	0.818586	11
754	TEX10	-0.640035	-0.576241	0.00166134	0.00509286	-0.967719	-1.61334	4232	3	TEX10_3; TEX10_4; TEX10_1	4	54881	Q9NXF1	321	54881	5033	P13674	TEX10	P4HA1	6.89294e-32	0.0901887	0.909811	5	3	MLL1-WDR5 complex; 5FMC (Friends of Methylated Chtop) complex; LAS1L-PELP1-TEX10-WDR18-NOL9-SENP3 complex	27; 5; 6	5; 3; 3	5386; 6854; 6855
755	TEX10	-0.640035	-0.576241	0.00166134	0.00509286	-0.967719	-1.61334	4232	3	TEX10_3; TEX10_4; TEX10_1	4	54881	Q9NXF1	321	54881	57418	Q9BV38	TEX10	WDR18	5.41896e-21	0.000192811	0.999807	5	3	MLL1-WDR5 complex; 5FMC (Friends of Methylated Chtop) complex; LAS1L-PELP1-TEX10-WDR18-NOL9-SENP3 complex	27; 5; 6	5; 3; 3	5386; 6854; 6855
756	TEX10	-0.640035	-0.576241	0.00166134	0.00509286	-0.967719	-1.61334	4232	3	TEX10_3; TEX10_4; TEX10_1	4	54881	Q9NXF1	321	54881	27043	Q8IZL8	TEX10	PELP1	9.30554e-16	0.0309377	0.969062	5	3	MLL1-WDR5 complex; 5FMC (Friends of Methylated Chtop) complex; LAS1L-PELP1-TEX10-WDR18-NOL9-SENP3 complex	27; 5; 6	5; 3; 3	5386; 6854; 6855
757	TEX10	-0.640035	-0.576241	0.00166134	0.00509286	-0.967719	-1.61334	4232	3	TEX10_3; TEX10_4; TEX10_1	4	54881	Q9NXF1	321	54881	6727	P37108	TEX10	SRP14	2.9001e-09	0.228745	0.771255	5	3	MLL1-WDR5 complex; 5FMC (Friends of Methylated Chtop) complex; LAS1L-PELP1-TEX10-WDR18-NOL9-SENP3 complex	27; 5; 6	5; 3; 3	5386; 6854; 6855
758	TEX10	-0.640035	-0.576241	0.00166134	0.00509286	-0.967719	-1.61334	4232	3	TEX10_3; TEX10_4; TEX10_1	4	54881	Q9NXF1	321	54881	5936	Q9BWF3	TEX10	RBM4	8.71331e-11	0.167526	0.832474	5	3	MLL1-WDR5 complex; 5FMC (Friends of Methylated Chtop) complex; LAS1L-PELP1-TEX10-WDR18-NOL9-SENP3 complex	27; 5; 6	5; 3; 3	5386; 6854; 6855
759	MBTD1	-0.637917	-0.637917	0.0194205	0.0259424	-0.956462	-1.44537	48919	2	MBTD1_1; MBTD1_4	4	54799	Q05BQ5	323	54799	10902	Q9H0E9	MBTD1	BRD8	0.0132958	0.0094699	0.977234	3
760	MBTD1	-0.637917	-0.637917	0.0194205	0.0259424	-0.956462	-1.44537	48919	2	MBTD1_1; MBTD1_4	4	54799	Q05BQ5	323	54799	55257	Q9NV56	MBTD1	MRGBP	3.07235e-10	5.75396e-06	0.999994	3
761	MBTD1	-0.637917	-0.637917	0.0194205	0.0259424	-0.956462	-1.44537	48919	2	MBTD1_1; MBTD1_4	4	54799	Q05BQ5	323	54799	26122	Q52LR7	MBTD1	EPC2	3.03232e-09	2.83574e-06	0.999997	3
762	TNFAIP3	-0.636888	-0.605618	0.000533762	0.00259083	-0.979601	-1.63315	1359	3	TNFAIP3_2; TNFAIP3_1; TNFAIP3_3	4	7128	P21580	324	7128	329	Q13490	TNFAIP3	BIRC2	3.21277e-09	0.196636	0.803364	1
763	UBE2L3	-0.635554	-0.635554	0.00942325	0.0161413	-0.971368	-1.4679	23736	2	UBE2L3_1; UBE2L3_3	4	7332	P68036	325	7332	26190	Q9UKT8	UBE2L3	FBXW2	1.37443e-06	0.000107784	0.999891	1	1	BRCA1-BARD1-UbcH7c complex	3	1	2823
764	ELP5	-0.635152	-0.605664	0.00042106	0.00224549	-0.961345	-1.72554	1087	4	ELP5_2; ELP5_1; ELP5_3; ELP5_4	4	23587	Q8TE02	326	23587	55140	Q9H9T3	ELP5	ELP3	0.000108522	8.4837e-05	0.999807	2
765	ELP5	-0.635152	-0.605664	0.00042106	0.00224549	-0.961345	-1.72554	1087	4	ELP5_2; ELP5_1; ELP5_3; ELP5_4	4	23587	Q8TE02	326	23587	26610	Q96EB1	ELP5	ELP4	0.004022	1.1279e-05	0.995967	2
766	EPRS	-0.634262	-0.634262	0.0280177	0.0333233	-0.946043	-1.42963	70575	2	EPRS_1; EPRS_4	4	2058	P07814	327	2058	3735	Q15046	EPRS	KARS	1.49306e-13	0.00169778	0.998302	2	2	Multisynthetase complex; GAIT complex	11; 4	4; 1	3040; 5385
767	EPRS	-0.634262	-0.634262	0.0280177	0.0333233	-0.946043	-1.42963	70575	2	EPRS_1; EPRS_4	4	2058	P07814	327	2058	5917	P54136	EPRS	RARS	2.02589e-15	0.00431414	0.995686	2	2	Multisynthetase complex; GAIT complex	11; 4	4; 1	3040; 5385
768	HSPA8	-0.6333	-0.430129	0.00314253	0.00783989	-0.958194	-1.59746	8006	3	HSPA8_3; HSPA8_4; HSPA8_1	4	3312	P11142	328	3312	23248	Q5VT52	HSPA8	RPRD2	6.69773e-24	0.000620007	0.99938	20	12	HMGB1-HMGB2-HSC70-ERP60-GAPDH complex; P2X7 receptor signalling complex; CEN complex; BCOR complex; CDC5L core complex; CDC5L complex; HCF-1 complex; Profilin 1 complex; CHIP-HSC70-TAU-UBCH5B complex; BAG1-HSC70 complex; DNJC3-DNAJB1-HSPA8 complex; DNAJC7-HSPA8-HSP90AA1 complex	5; 12; 37; 8; 6; 30; 18; 6; 4; 2; 3; 3	1; 1; 2; 1; 2; 5; 4; 1; 2; 1; 1; 1	280; 725; 929; 1178; 1182; 1183; 2721; 2837; 6037; 6114; 6396; 6399
769	HSPA8	-0.6333	-0.430129	0.00314253	0.00783989	-0.958194	-1.59746	8006	3	HSPA8_3; HSPA8_4; HSPA8_1	4	3312	P11142	328	3312	2033	Q09472	HSPA8	EP300	1.20964e-06	0.0084259	0.991573	20	12	HMGB1-HMGB2-HSC70-ERP60-GAPDH complex; P2X7 receptor signalling complex; CEN complex; BCOR complex; CDC5L core complex; CDC5L complex; HCF-1 complex; Profilin 1 complex; CHIP-HSC70-TAU-UBCH5B complex; BAG1-HSC70 complex; DNJC3-DNAJB1-HSPA8 complex; DNAJC7-HSPA8-HSP90AA1 complex	5; 12; 37; 8; 6; 30; 18; 6; 4; 2; 3; 3	1; 1; 2; 1; 2; 5; 4; 1; 2; 1; 1; 1	280; 725; 929; 1178; 1182; 1183; 2721; 2837; 6037; 6114; 6396; 6399
770	HSPA8	-0.6333	-0.430129	0.00314253	0.00783989	-0.958194	-1.59746	8006	3	HSPA8_3; HSPA8_4; HSPA8_1	4	3312	P11142	328	3312	7094	Q9Y490	HSPA8	TLN1	1.70389e-10	0.159668	0.840332	20	12	HMGB1-HMGB2-HSC70-ERP60-GAPDH complex; P2X7 receptor signalling complex; CEN complex; BCOR complex; CDC5L core complex; CDC5L complex; HCF-1 complex; Profilin 1 complex; CHIP-HSC70-TAU-UBCH5B complex; BAG1-HSC70 complex; DNJC3-DNAJB1-HSPA8 complex; DNAJC7-HSPA8-HSP90AA1 complex	5; 12; 37; 8; 6; 30; 18; 6; 4; 2; 3; 3	1; 1; 2; 1; 2; 5; 4; 1; 2; 1; 1; 1	280; 725; 929; 1178; 1182; 1183; 2721; 2837; 6037; 6114; 6396; 6399
771	HSPA8	-0.6333	-0.430129	0.00314253	0.00783989	-0.958194	-1.59746	8006	3	HSPA8_3; HSPA8_4; HSPA8_1	4	3312	P11142	328	3312	9146	O14964	HSPA8	HGS	3.56742e-08	0.00317049	0.996829	20	12	HMGB1-HMGB2-HSC70-ERP60-GAPDH complex; P2X7 receptor signalling complex; CEN complex; BCOR complex; CDC5L core complex; CDC5L complex; HCF-1 complex; Profilin 1 complex; CHIP-HSC70-TAU-UBCH5B complex; BAG1-HSC70 complex; DNJC3-DNAJB1-HSPA8 complex; DNAJC7-HSPA8-HSP90AA1 complex	5; 12; 37; 8; 6; 30; 18; 6; 4; 2; 3; 3	1; 1; 2; 1; 2; 5; 4; 1; 2; 1; 1; 1	280; 725; 929; 1178; 1182; 1183; 2721; 2837; 6037; 6114; 6396; 6399
772	HSPA8	-0.6333	-0.430129	0.00314253	0.00783989	-0.958194	-1.59746	8006	3	HSPA8_3; HSPA8_4; HSPA8_1	4	3312	P11142	328	3312	4209	Q14814	HSPA8	MEF2D	0.0173403	6.53691e-07	0.982659	20	12	HMGB1-HMGB2-HSC70-ERP60-GAPDH complex; P2X7 receptor signalling complex; CEN complex; BCOR complex; CDC5L core complex; CDC5L complex; HCF-1 complex; Profilin 1 complex; CHIP-HSC70-TAU-UBCH5B complex; BAG1-HSC70 complex; DNJC3-DNAJB1-HSPA8 complex; DNAJC7-HSPA8-HSP90AA1 complex	5; 12; 37; 8; 6; 30; 18; 6; 4; 2; 3; 3	1; 1; 2; 1; 2; 5; 4; 1; 2; 1; 1; 1	280; 725; 929; 1178; 1182; 1183; 2721; 2837; 6037; 6114; 6396; 6399
773	HSPA8	-0.6333	-0.430129	0.00314253	0.00783989	-0.958194	-1.59746	8006	3	HSPA8_3; HSPA8_4; HSPA8_1	4	3312	P11142	328	3312	51592	Q9UPN9	HSPA8	TRIM33	0.00176316	0.0689472	0.92929	20	12	HMGB1-HMGB2-HSC70-ERP60-GAPDH complex; P2X7 receptor signalling complex; CEN complex; BCOR complex; CDC5L core complex; CDC5L complex; HCF-1 complex; Profilin 1 complex; CHIP-HSC70-TAU-UBCH5B complex; BAG1-HSC70 complex; DNJC3-DNAJB1-HSPA8 complex; DNAJC7-HSPA8-HSP90AA1 complex	5; 12; 37; 8; 6; 30; 18; 6; 4; 2; 3; 3	1; 1; 2; 1; 2; 5; 4; 1; 2; 1; 1; 1	280; 725; 929; 1178; 1182; 1183; 2721; 2837; 6037; 6114; 6396; 6399
774	HSPA8	-0.6333	-0.430129	0.00314253	0.00783989	-0.958194	-1.59746	8006	3	HSPA8_3; HSPA8_4; HSPA8_1	4	3312	P11142	328	3312	56683	P57076	HSPA8	C21orf59	1.72573e-21	0.00984754	0.990152	20	12	HMGB1-HMGB2-HSC70-ERP60-GAPDH complex; P2X7 receptor signalling complex; CEN complex; BCOR complex; CDC5L core complex; CDC5L complex; HCF-1 complex; Profilin 1 complex; CHIP-HSC70-TAU-UBCH5B complex; BAG1-HSC70 complex; DNJC3-DNAJB1-HSPA8 complex; DNAJC7-HSPA8-HSP90AA1 complex	5; 12; 37; 8; 6; 30; 18; 6; 4; 2; 3; 3	1; 1; 2; 1; 2; 5; 4; 1; 2; 1; 1; 1	280; 725; 929; 1178; 1182; 1183; 2721; 2837; 6037; 6114; 6396; 6399
775	HSPA8	-0.6333	-0.430129	0.00314253	0.00783989	-0.958194	-1.59746	8006	3	HSPA8_3; HSPA8_4; HSPA8_1	4	3312	P11142	328	3312	1801	Q9BZG8	HSPA8	DPH1	0.0391667	2.2049e-07	0.960833	20	12	HMGB1-HMGB2-HSC70-ERP60-GAPDH complex; P2X7 receptor signalling complex; CEN complex; BCOR complex; CDC5L core complex; CDC5L complex; HCF-1 complex; Profilin 1 complex; CHIP-HSC70-TAU-UBCH5B complex; BAG1-HSC70 complex; DNJC3-DNAJB1-HSPA8 complex; DNAJC7-HSPA8-HSP90AA1 complex	5; 12; 37; 8; 6; 30; 18; 6; 4; 2; 3; 3	1; 1; 2; 1; 2; 5; 4; 1; 2; 1; 1; 1	280; 725; 929; 1178; 1182; 1183; 2721; 2837; 6037; 6114; 6396; 6399
776	HSPA8	-0.6333	-0.430129	0.00314253	0.00783989	-0.958194	-1.59746	8006	3	HSPA8_3; HSPA8_4; HSPA8_1	4	3312	P11142	328	3312	5170	O15530	HSPA8	PDPK1	1.13834e-21	0.00943951	0.99056	20	12	HMGB1-HMGB2-HSC70-ERP60-GAPDH complex; P2X7 receptor signalling complex; CEN complex; BCOR complex; CDC5L core complex; CDC5L complex; HCF-1 complex; Profilin 1 complex; CHIP-HSC70-TAU-UBCH5B complex; BAG1-HSC70 complex; DNJC3-DNAJB1-HSPA8 complex; DNAJC7-HSPA8-HSP90AA1 complex	5; 12; 37; 8; 6; 30; 18; 6; 4; 2; 3; 3	1; 1; 2; 1; 2; 5; 4; 1; 2; 1; 1; 1	280; 725; 929; 1178; 1182; 1183; 2721; 2837; 6037; 6114; 6396; 6399
777	HSPA8	-0.6333	-0.430129	0.00314253	0.00783989	-0.958194	-1.59746	8006	3	HSPA8_3; HSPA8_4; HSPA8_1	4	3312	P11142	328	3312	55206	A3KN83	HSPA8	SBNO1	5.82961e-23	0.00131641	0.998684	20	12	HMGB1-HMGB2-HSC70-ERP60-GAPDH complex; P2X7 receptor signalling complex; CEN complex; BCOR complex; CDC5L core complex; CDC5L complex; HCF-1 complex; Profilin 1 complex; CHIP-HSC70-TAU-UBCH5B complex; BAG1-HSC70 complex; DNJC3-DNAJB1-HSPA8 complex; DNAJC7-HSPA8-HSP90AA1 complex	5; 12; 37; 8; 6; 30; 18; 6; 4; 2; 3; 3	1; 1; 2; 1; 2; 5; 4; 1; 2; 1; 1; 1	280; 725; 929; 1178; 1182; 1183; 2721; 2837; 6037; 6114; 6396; 6399
778	HSPA8	-0.6333	-0.430129	0.00314253	0.00783989	-0.958194	-1.59746	8006	3	HSPA8_3; HSPA8_4; HSPA8_1	4	3312	P11142	328	3312	119032	Q96B45	HSPA8	C10orf32	1.7776e-16	0.0673223	0.932678	20	12	HMGB1-HMGB2-HSC70-ERP60-GAPDH complex; P2X7 receptor signalling complex; CEN complex; BCOR complex; CDC5L core complex; CDC5L complex; HCF-1 complex; Profilin 1 complex; CHIP-HSC70-TAU-UBCH5B complex; BAG1-HSC70 complex; DNJC3-DNAJB1-HSPA8 complex; DNAJC7-HSPA8-HSP90AA1 complex	5; 12; 37; 8; 6; 30; 18; 6; 4; 2; 3; 3	1; 1; 2; 1; 2; 5; 4; 1; 2; 1; 1; 1	280; 725; 929; 1178; 1182; 1183; 2721; 2837; 6037; 6114; 6396; 6399
779	HSPA8	-0.6333	-0.430129	0.00314253	0.00783989	-0.958194	-1.59746	8006	3	HSPA8_3; HSPA8_4; HSPA8_1	4	3312	P11142	328	3312	3611	Q13418	HSPA8	ILK	1.13908e-16	0.0825373	0.917463	20	12	HMGB1-HMGB2-HSC70-ERP60-GAPDH complex; P2X7 receptor signalling complex; CEN complex; BCOR complex; CDC5L core complex; CDC5L complex; HCF-1 complex; Profilin 1 complex; CHIP-HSC70-TAU-UBCH5B complex; BAG1-HSC70 complex; DNJC3-DNAJB1-HSPA8 complex; DNAJC7-HSPA8-HSP90AA1 complex	5; 12; 37; 8; 6; 30; 18; 6; 4; 2; 3; 3	1; 1; 2; 1; 2; 5; 4; 1; 2; 1; 1; 1	280; 725; 929; 1178; 1182; 1183; 2721; 2837; 6037; 6114; 6396; 6399
780	HSPA8	-0.6333	-0.430129	0.00314253	0.00783989	-0.958194	-1.59746	8006	3	HSPA8_3; HSPA8_4; HSPA8_1	4	3312	P11142	328	3312	27304	O95396	HSPA8	MOCS3	1.69155e-18	0.166647	0.833353	20	12	HMGB1-HMGB2-HSC70-ERP60-GAPDH complex; P2X7 receptor signalling complex; CEN complex; BCOR complex; CDC5L core complex; CDC5L complex; HCF-1 complex; Profilin 1 complex; CHIP-HSC70-TAU-UBCH5B complex; BAG1-HSC70 complex; DNJC3-DNAJB1-HSPA8 complex; DNAJC7-HSPA8-HSP90AA1 complex	5; 12; 37; 8; 6; 30; 18; 6; 4; 2; 3; 3	1; 1; 2; 1; 2; 5; 4; 1; 2; 1; 1; 1	280; 725; 929; 1178; 1182; 1183; 2721; 2837; 6037; 6114; 6396; 6399
781	HSPA8	-0.6333	-0.430129	0.00314253	0.00783989	-0.958194	-1.59746	8006	3	HSPA8_3; HSPA8_4; HSPA8_1	4	3312	P11142	328	3312	79029	Q9BVQ7	HSPA8	SPATA5L1	5.85121e-17	0.107833	0.892167	20	12	HMGB1-HMGB2-HSC70-ERP60-GAPDH complex; P2X7 receptor signalling complex; CEN complex; BCOR complex; CDC5L core complex; CDC5L complex; HCF-1 complex; Profilin 1 complex; CHIP-HSC70-TAU-UBCH5B complex; BAG1-HSC70 complex; DNJC3-DNAJB1-HSPA8 complex; DNAJC7-HSPA8-HSP90AA1 complex	5; 12; 37; 8; 6; 30; 18; 6; 4; 2; 3; 3	1; 1; 2; 1; 2; 5; 4; 1; 2; 1; 1; 1	280; 725; 929; 1178; 1182; 1183; 2721; 2837; 6037; 6114; 6396; 6399
782	HSPA8	-0.6333	-0.430129	0.00314253	0.00783989	-0.958194	-1.59746	8006	3	HSPA8_3; HSPA8_4; HSPA8_1	4	3312	P11142	328	3312	134430	Q8NI36	HSPA8	WDR36	6.77506e-18	0.142326	0.857674	20	12	HMGB1-HMGB2-HSC70-ERP60-GAPDH complex; P2X7 receptor signalling complex; CEN complex; BCOR complex; CDC5L core complex; CDC5L complex; HCF-1 complex; Profilin 1 complex; CHIP-HSC70-TAU-UBCH5B complex; BAG1-HSC70 complex; DNJC3-DNAJB1-HSPA8 complex; DNAJC7-HSPA8-HSP90AA1 complex	5; 12; 37; 8; 6; 30; 18; 6; 4; 2; 3; 3	1; 1; 2; 1; 2; 5; 4; 1; 2; 1; 1; 1	280; 725; 929; 1178; 1182; 1183; 2721; 2837; 6037; 6114; 6396; 6399
783	HSPA8	-0.6333	-0.430129	0.00314253	0.00783989	-0.958194	-1.59746	8006	3	HSPA8_3; HSPA8_4; HSPA8_1	4	3312	P11142	328	3312	26610	Q96EB1	HSPA8	ELP4	2.01675e-14	0.0112417	0.988758	20	12	HMGB1-HMGB2-HSC70-ERP60-GAPDH complex; P2X7 receptor signalling complex; CEN complex; BCOR complex; CDC5L core complex; CDC5L complex; HCF-1 complex; Profilin 1 complex; CHIP-HSC70-TAU-UBCH5B complex; BAG1-HSC70 complex; DNJC3-DNAJB1-HSPA8 complex; DNAJC7-HSPA8-HSP90AA1 complex	5; 12; 37; 8; 6; 30; 18; 6; 4; 2; 3; 3	1; 1; 2; 1; 2; 5; 4; 1; 2; 1; 1; 1	280; 725; 929; 1178; 1182; 1183; 2721; 2837; 6037; 6114; 6396; 6399
784	HSPA8	-0.6333	-0.430129	0.00314253	0.00783989	-0.958194	-1.59746	8006	3	HSPA8_3; HSPA8_4; HSPA8_1	4	3312	P11142	328	3312	9013	Q15572	HSPA8	TAF1C	3.21568e-18	0.248913	0.751087	20	12	HMGB1-HMGB2-HSC70-ERP60-GAPDH complex; P2X7 receptor signalling complex; CEN complex; BCOR complex; CDC5L core complex; CDC5L complex; HCF-1 complex; Profilin 1 complex; CHIP-HSC70-TAU-UBCH5B complex; BAG1-HSC70 complex; DNJC3-DNAJB1-HSPA8 complex; DNAJC7-HSPA8-HSP90AA1 complex	5; 12; 37; 8; 6; 30; 18; 6; 4; 2; 3; 3	1; 1; 2; 1; 2; 5; 4; 1; 2; 1; 1; 1	280; 725; 929; 1178; 1182; 1183; 2721; 2837; 6037; 6114; 6396; 6399
785	HSPA8	-0.6333	-0.430129	0.00314253	0.00783989	-0.958194	-1.59746	8006	3	HSPA8_3; HSPA8_4; HSPA8_1	4	3312	P11142	328	3312	57418	Q9BV38	HSPA8	WDR18	1.6707e-15	0.236151	0.763849	20	12	HMGB1-HMGB2-HSC70-ERP60-GAPDH complex; P2X7 receptor signalling complex; CEN complex; BCOR complex; CDC5L core complex; CDC5L complex; HCF-1 complex; Profilin 1 complex; CHIP-HSC70-TAU-UBCH5B complex; BAG1-HSC70 complex; DNJC3-DNAJB1-HSPA8 complex; DNAJC7-HSPA8-HSP90AA1 complex	5; 12; 37; 8; 6; 30; 18; 6; 4; 2; 3; 3	1; 1; 2; 1; 2; 5; 4; 1; 2; 1; 1; 1	280; 725; 929; 1178; 1182; 1183; 2721; 2837; 6037; 6114; 6396; 6399
786	HSPA8	-0.6333	-0.430129	0.00314253	0.00783989	-0.958194	-1.59746	8006	3	HSPA8_3; HSPA8_4; HSPA8_1	4	3312	P11142	328	3312	10273	Q9UNE7	HSPA8	STUB1	1.48218e-14	0.0140727	0.985927	20	12	HMGB1-HMGB2-HSC70-ERP60-GAPDH complex; P2X7 receptor signalling complex; CEN complex; BCOR complex; CDC5L core complex; CDC5L complex; HCF-1 complex; Profilin 1 complex; CHIP-HSC70-TAU-UBCH5B complex; BAG1-HSC70 complex; DNJC3-DNAJB1-HSPA8 complex; DNAJC7-HSPA8-HSP90AA1 complex	5; 12; 37; 8; 6; 30; 18; 6; 4; 2; 3; 3	1; 1; 2; 1; 2; 5; 4; 1; 2; 1; 1; 1	280; 725; 929; 1178; 1182; 1183; 2721; 2837; 6037; 6114; 6396; 6399
787	HSPA8	-0.6333	-0.430129	0.00314253	0.00783989	-0.958194	-1.59746	8006	3	HSPA8_3; HSPA8_4; HSPA8_1	4	3312	P11142	328	3312	64223	Q9BVC4	HSPA8	MLST8	4.70651e-14	0.0378737	0.962126	20	12	HMGB1-HMGB2-HSC70-ERP60-GAPDH complex; P2X7 receptor signalling complex; CEN complex; BCOR complex; CDC5L core complex; CDC5L complex; HCF-1 complex; Profilin 1 complex; CHIP-HSC70-TAU-UBCH5B complex; BAG1-HSC70 complex; DNJC3-DNAJB1-HSPA8 complex; DNAJC7-HSPA8-HSP90AA1 complex	5; 12; 37; 8; 6; 30; 18; 6; 4; 2; 3; 3	1; 1; 2; 1; 2; 5; 4; 1; 2; 1; 1; 1	280; 725; 929; 1178; 1182; 1183; 2721; 2837; 6037; 6114; 6396; 6399
788	PSMD11	-0.632705	-0.632705	0.00795917	0.0145748	-0.973994	-1.47186	20048	2	PSMD11_2; PSMD11_4	4	5717	O00231	330	5717	5695	Q99436	PSMD11	PSMB7	9.74266e-17	0.210591	0.789409	3	2	PA700 complex; PA700-20S-PA28 complex	20; 36	3; 4	32; 193
789	PSMD11	-0.632705	-0.632705	0.00795917	0.0145748	-0.973994	-1.47186	20048	2	PSMD11_2; PSMD11_4	4	5717	O00231	330	5717	5719	Q9UNM6	PSMD11	PSMD13	1.54106e-12	0.000495255	0.999505	3	2	PA700 complex; PA700-20S-PA28 complex	20; 36	3; 4	32; 193
790	PSMD11	-0.632705	-0.632705	0.00795917	0.0145748	-0.973994	-1.47186	20048	2	PSMD11_2; PSMD11_4	4	5717	O00231	330	5717	5710	P55036	PSMD11	PSMD4	4.64965e-09	0.0247548	0.975245	3	2	PA700 complex; PA700-20S-PA28 complex	20; 36	3; 4	32; 193
791	MARS	-0.631902	-0.502394	0.0116031	0.0185857	-0.929859	-1.55022	29563	3	MARS_4; MARS_2; MARS_1	4	4141	P56192	331	4141	3735	Q15046	MARS	KARS	4.41356e-14	0.0025723	0.997428	2	1	Multisynthetase complex	11	4	3040
792	MARS	-0.631902	-0.502394	0.0116031	0.0185857	-0.929859	-1.55022	29563	3	MARS_4; MARS_2; MARS_1	4	4141	P56192	331	4141	5917	P54136	MARS	RARS	1.44222e-14	0.0064729	0.993527	2	1	Multisynthetase complex	11	4	3040
793	NDOR1	-0.631638	-0.631638	0.0265147	0.0320652	-0.947761	-1.43222	66789	2	NDOR1_1; NDOR1_3	4	27158	Q9UHB4	332	27158	136647	Q8TAP9	NDOR1	MPLKIP	0.0301481	3.91454e-06	0.969848	1
794	PDS5A	-0.627194	-0.558501	0.0015852	0.00497807	-0.968244	-1.61422	4038	3	PDS5A_3; PDS5A_1; PDS5A_4	4	23244	Q29RF7	333	23244	23047	Q9NTI5	PDS5A	PDS5B	5.91144e-06	0.000167712	0.999826	1	1	Sororin-cohesin complex	6	2	5432
795	EXOSC5	-0.625861	-0.625861	0.00644705	0.0125097	-0.977032	-1.47645	16239	2	EXOSC5_2; EXOSC5_1	4	56915	Q9NQT4	334	56915	5822	Q15269	EXOSC5	PWP2	0.00573381	0.133873	0.860394	3	2	Exosome; Exosome	23; 23	7; 7	789; 7443
796	EXOSC5	-0.625861	-0.625861	0.00644705	0.0125097	-0.977032	-1.47645	16239	2	EXOSC5_2; EXOSC5_1	4	56915	Q9NQT4	334	56915	11340	Q96B26	EXOSC5	EXOSC8	3.37329e-26	0.00538028	0.99462	3	2	Exosome; Exosome	23; 23	7; 7	789; 7443
797	EXOSC5	-0.625861	-0.625861	0.00644705	0.0125097	-0.977032	-1.47645	16239	2	EXOSC5_2; EXOSC5_1	4	56915	Q9NQT4	334	56915	51013	Q9Y3B2	EXOSC5	EXOSC1	7.99238e-26	4.59287e-05	0.999954	3	2	Exosome; Exosome	23; 23	7; 7	789; 7443
798	CYFIP1	-0.620104	-0.605855	0.000672225	0.00297107	-0.955496	-1.71504	1736	4	CYFIP1_4; CYFIP1_3; CYFIP1_2; CYFIP1_1	4	23191	Q7L576	336	23191	55845	Q8WUW1	CYFIP1	BRK1	1.20001e-10	3.81558e-06	0.999996	1	2	Wave-2 complex; ABI3-WAVE2-CYFIP1 complex	5; 3	3; 2	186; 6991
799	C11orf57	-0.619675	-0.619675	0.0266639	0.0321308	-0.94759	-1.43196	67165	2	C11orf57_3; C11orf57_2	4	55216	Q6ZUT1	337	55216	10250	Q8IYB3	C11orf57	SRRM1	3.00148e-15	0.231041	0.768959	4
800	C11orf57	-0.619675	-0.619675	0.0266639	0.0321308	-0.94759	-1.43196	67165	2	C11orf57_3; C11orf57_2	4	55216	Q6ZUT1	337	55216	6426	Q07955	C11orf57	SRSF1	1.42034e-14	0.172449	0.827551	4
801	C11orf57	-0.619675	-0.619675	0.0266639	0.0321308	-0.94759	-1.43196	67165	2	C11orf57_3; C11orf57_2	4	55216	Q6ZUT1	337	55216	4820	P30414	C11orf57	NKTR	1.41947e-11	1.25171e-05	0.999987	4
802	C11orf57	-0.619675	-0.619675	0.0266639	0.0321308	-0.94759	-1.43196	67165	2	C11orf57_3; C11orf57_2	4	55216	Q6ZUT1	337	55216	23144	Q8IXZ2	C11orf57	ZC3H3	3.37213e-05	0.0179502	0.982016	4
803	C3orf17	-0.616684	-0.616684	0.00737441	0.0137502	-0.97513	-1.47358	18575	2	C3orf17_2; C3orf17_3	4	25871	Q6NW34	339	25871	10557	P78345	C3orf17	RPP38	1.69138e-13	0.00529558	0.994704	5
804	C3orf17	-0.616684	-0.616684	0.00737441	0.0137502	-0.97513	-1.47358	18575	2	C3orf17_2; C3orf17_3	4	25871	Q6NW34	339	25871	11102	O95059	C3orf17	RPP14	1.09898e-11	1.17497e-07	1	5
805	C3orf17	-0.616684	-0.616684	0.00737441	0.0137502	-0.97513	-1.47358	18575	2	C3orf17_2; C3orf17_3	4	25871	Q6NW34	339	25871	51367	Q969H6	C3orf17	POP5	2.79894e-11	1.25381e-06	0.999999	5
806	C3orf17	-0.616684	-0.616684	0.00737441	0.0137502	-0.97513	-1.47358	18575	2	C3orf17_2; C3orf17_3	4	25871	Q6NW34	339	25871	10556	P78346	C3orf17	RPP30	1.93629e-16	2.23498e-08	1	5
807	C3orf17	-0.616684	-0.616684	0.00737441	0.0137502	-0.97513	-1.47358	18575	2	C3orf17_2; C3orf17_3	4	25871	Q6NW34	339	25871	10248	O75817	C3orf17	POP7	1.09025e-12	7.19553e-06	0.999993	5
808	TNIP1	-0.616506	-0.616506	0.0402532	0.0441367	-0.933295	-1.41036	101396	2	TNIP1_4; TNIP1_2	4	10318	Q15025	340	10318	23071	Q9BS26	TNIP1	ERP44	1.40963e-26	0.00293563	0.997064	3	2	CHUK-NFKB2-REL-IKBKG-SPAG9-NFKB1-NFKBIE-COPB2-TNIP1-NFKBIA-RELA-TNIP2 complex; TNF-R1-associated signaling complex	12; 15	1; 2	5230; 6344
809	TNIP1	-0.616506	-0.616506	0.0402532	0.0441367	-0.933295	-1.41036	101396	2	TNIP1_4; TNIP1_2	4	10318	Q15025	340	10318	55845	Q8WUW1	TNIP1	BRK1	1.02421e-10	0.000350746	0.999649	3	2	CHUK-NFKB2-REL-IKBKG-SPAG9-NFKB1-NFKBIE-COPB2-TNIP1-NFKBIA-RELA-TNIP2 complex; TNF-R1-associated signaling complex	12; 15	1; 2	5230; 6344
810	TNIP1	-0.616506	-0.616506	0.0402532	0.0441367	-0.933295	-1.41036	101396	2	TNIP1_4; TNIP1_2	4	10318	Q15025	340	10318	55763	Q9NV70	TNIP1	EXOC1	9.23042e-06	0.0382526	0.961738	3	2	CHUK-NFKB2-REL-IKBKG-SPAG9-NFKB1-NFKBIE-COPB2-TNIP1-NFKBIA-RELA-TNIP2 complex; TNF-R1-associated signaling complex	12; 15	1; 2	5230; 6344
811	NOC4L	-0.615628	-0.615628	0.0171597	0.0235371	-0.959486	-1.44994	43224	2	NOC4L_3; NOC4L_2	4	79050	Q9BVI4	342	79050	1616	Q9UER7	NOC4L	DAXX	0.00100658	0.0716864	0.927307	5
812	NOC4L	-0.615628	-0.615628	0.0171597	0.0235371	-0.959486	-1.44994	43224	2	NOC4L_3; NOC4L_2	4	79050	Q9BVI4	342	79050	6223	P39019	NOC4L	RPS19	6.3645e-12	8.81645e-05	0.999912	5
813	NOC4L	-0.615628	-0.615628	0.0171597	0.0235371	-0.959486	-1.44994	43224	2	NOC4L_3; NOC4L_2	4	79050	Q9BVI4	342	79050	6208	P62263	NOC4L	RPS14	1.54025e-10	0.0298677	0.970132	5
814	NOC4L	-0.615628	-0.615628	0.0171597	0.0235371	-0.959486	-1.44994	43224	2	NOC4L_3; NOC4L_2	4	79050	Q9BVI4	342	79050	11103	Q13601	NOC4L	KRR1	2.99983e-13	0.00143848	0.998562	5
815	NOC4L	-0.615628	-0.615628	0.0171597	0.0235371	-0.959486	-1.44994	43224	2	NOC4L_3; NOC4L_2	4	79050	Q9BVI4	342	79050	23144	Q8IXZ2	NOC4L	ZC3H3	0.000247877	0.00711947	0.992633	5
816	PLOD3	-0.614565	-0.573785	0.00162523	0.00502427	-0.967946	-1.61372	4140	3	PLOD3_2; PLOD3_3; PLOD3_1	4	8985	O60568	343	8985	79709	Q8NBJ5	PLOD3	COLGALT1	1.37469e-12	0.00129075	0.998709	1	1	ADIPOQ-PLOD3-GLT25D1 complex	3	2	6997
817	BLOC1S2	-0.612577	-0.526328	0.000688866	0.00300749	-0.955184	-1.71448	1779	4	BLOC1S2_3; BLOC1S2_4; BLOC1S2_1; BLOC1S2_2	4	282991	Q6QNY1	344	282991	389541	Q0VGL1	BLOC1S2	LAMTOR4	0.0387273	0.0220954	0.939177	14	5	BLOC-1 (biogenesis of lysosome-related organelles complex 1); AP3-BLOC1 complex; BLOC1-BLOC2 complex; dysbindin-Snapin-BLOS2 complex; BORC complex	8; 15; 11; 3; 8	3; 3; 3; 2; 8	23; 652; 654; 6416; 7545
818	BLOC1S2	-0.612577	-0.526328	0.000688866	0.00300749	-0.955184	-1.71448	1779	4	BLOC1S2_3; BLOC1S2_4; BLOC1S2_1; BLOC1S2_2	4	282991	Q6QNY1	344	282991	119032	Q96B45	BLOC1S2	C10orf32	7.60929e-09	1.43092e-07	1	14	5	BLOC-1 (biogenesis of lysosome-related organelles complex 1); AP3-BLOC1 complex; BLOC1-BLOC2 complex; dysbindin-Snapin-BLOS2 complex; BORC complex	8; 15; 11; 3; 8	3; 3; 3; 2; 8	23; 652; 654; 6416; 7545
819	BLOC1S2	-0.612577	-0.526328	0.000688866	0.00300749	-0.955184	-1.71448	1779	4	BLOC1S2_3; BLOC1S2_4; BLOC1S2_1; BLOC1S2_2	4	282991	Q6QNY1	344	282991	729991	Q96FH0	BLOC1S2	MEF2BNB	3.3348e-10	9.85365e-08	1	14	5	BLOC-1 (biogenesis of lysosome-related organelles complex 1); AP3-BLOC1 complex; BLOC1-BLOC2 complex; dysbindin-Snapin-BLOS2 complex; BORC complex	8; 15; 11; 3; 8	3; 3; 3; 2; 8	23; 652; 654; 6416; 7545
820	BLOC1S2	-0.612577	-0.526328	0.000688866	0.00300749	-0.955184	-1.71448	1779	4	BLOC1S2_3; BLOC1S2_4; BLOC1S2_1; BLOC1S2_2	4	282991	Q6QNY1	344	282991	2647	P78537	BLOC1S2	BLOC1S1	4.83564e-07	4.98767e-08	0.999999	14	5	BLOC-1 (biogenesis of lysosome-related organelles complex 1); AP3-BLOC1 complex; BLOC1-BLOC2 complex; dysbindin-Snapin-BLOS2 complex; BORC complex	8; 15; 11; 3; 8	3; 3; 3; 2; 8	23; 652; 654; 6416; 7545
821	BLOC1S2	-0.612577	-0.526328	0.000688866	0.00300749	-0.955184	-1.71448	1779	4	BLOC1S2_3; BLOC1S2_4; BLOC1S2_1; BLOC1S2_2	4	282991	Q6QNY1	344	282991	91949	P83436	BLOC1S2	COG7	1.0977e-07	0.0144054	0.985594	14	5	BLOC-1 (biogenesis of lysosome-related organelles complex 1); AP3-BLOC1 complex; BLOC1-BLOC2 complex; dysbindin-Snapin-BLOS2 complex; BORC complex	8; 15; 11; 3; 8	3; 3; 3; 2; 8	23; 652; 654; 6416; 7545
822	BLOC1S2	-0.612577	-0.526328	0.000688866	0.00300749	-0.955184	-1.71448	1779	4	BLOC1S2_3; BLOC1S2_4; BLOC1S2_1; BLOC1S2_2	4	282991	Q6QNY1	344	282991	55004	Q6IAA8	BLOC1S2	LAMTOR1	0.0255365	0.00495799	0.969505	14	5	BLOC-1 (biogenesis of lysosome-related organelles complex 1); AP3-BLOC1 complex; BLOC1-BLOC2 complex; dysbindin-Snapin-BLOS2 complex; BORC complex	8; 15; 11; 3; 8	3; 3; 3; 2; 8	23; 652; 654; 6416; 7545
823	BLOC1S2	-0.612577	-0.526328	0.000688866	0.00300749	-0.955184	-1.71448	1779	4	BLOC1S2_3; BLOC1S2_4; BLOC1S2_1; BLOC1S2_2	4	282991	Q6QNY1	344	282991	79036	Q9BQD3	BLOC1S2	KXD1	1.32691e-08	0.000745355	0.999255	14	5	BLOC-1 (biogenesis of lysosome-related organelles complex 1); AP3-BLOC1 complex; BLOC1-BLOC2 complex; dysbindin-Snapin-BLOS2 complex; BORC complex	8; 15; 11; 3; 8	3; 3; 3; 2; 8	23; 652; 654; 6416; 7545
824	BLOC1S2	-0.612577	-0.526328	0.000688866	0.00300749	-0.955184	-1.71448	1779	4	BLOC1S2_3; BLOC1S2_4; BLOC1S2_1; BLOC1S2_2	4	282991	Q6QNY1	344	282991	51019	Q9Y3C0	BLOC1S2	CCDC53	3.92959e-10	0.000845093	0.999155	14	5	BLOC-1 (biogenesis of lysosome-related organelles complex 1); AP3-BLOC1 complex; BLOC1-BLOC2 complex; dysbindin-Snapin-BLOS2 complex; BORC complex	8; 15; 11; 3; 8	3; 3; 3; 2; 8	23; 652; 654; 6416; 7545
825	BLOC1S2	-0.612577	-0.526328	0.000688866	0.00300749	-0.955184	-1.71448	1779	4	BLOC1S2_3; BLOC1S2_4; BLOC1S2_1; BLOC1S2_2	4	282991	Q6QNY1	344	282991	10542	O43504	BLOC1S2	LAMTOR5	1.34975e-06	0.00268671	0.997312	14	5	BLOC-1 (biogenesis of lysosome-related organelles complex 1); AP3-BLOC1 complex; BLOC1-BLOC2 complex; dysbindin-Snapin-BLOS2 complex; BORC complex	8; 15; 11; 3; 8	3; 3; 3; 2; 8	23; 652; 654; 6416; 7545
826	BLOC1S2	-0.612577	-0.526328	0.000688866	0.00300749	-0.955184	-1.71448	1779	4	BLOC1S2_3; BLOC1S2_4; BLOC1S2_1; BLOC1S2_2	4	282991	Q6QNY1	344	282991	55845	Q8WUW1	BLOC1S2	BRK1	2.57823e-07	0.0289209	0.971079	14	5	BLOC-1 (biogenesis of lysosome-related organelles complex 1); AP3-BLOC1 complex; BLOC1-BLOC2 complex; dysbindin-Snapin-BLOS2 complex; BORC complex	8; 15; 11; 3; 8	3; 3; 3; 2; 8	23; 652; 654; 6416; 7545
827	BLOC1S2	-0.612577	-0.526328	0.000688866	0.00300749	-0.955184	-1.71448	1779	4	BLOC1S2_3; BLOC1S2_4; BLOC1S2_1; BLOC1S2_2	4	282991	Q6QNY1	344	282991	60592	Q9UIL1	BLOC1S2	SCOC	0.0399254	0.00746098	0.952614	14	5	BLOC-1 (biogenesis of lysosome-related organelles complex 1); AP3-BLOC1 complex; BLOC1-BLOC2 complex; dysbindin-Snapin-BLOS2 complex; BORC complex	8; 15; 11; 3; 8	3; 3; 3; 2; 8	23; 652; 654; 6416; 7545
828	BLOC1S2	-0.612577	-0.526328	0.000688866	0.00300749	-0.955184	-1.71448	1779	4	BLOC1S2_3; BLOC1S2_4; BLOC1S2_1; BLOC1S2_2	4	282991	Q6QNY1	344	282991	57511	Q9Y2V7	BLOC1S2	COG6	7.52061e-07	0.0205181	0.979481	14	5	BLOC-1 (biogenesis of lysosome-related organelles complex 1); AP3-BLOC1 complex; BLOC1-BLOC2 complex; dysbindin-Snapin-BLOS2 complex; BORC complex	8; 15; 11; 3; 8	3; 3; 3; 2; 8	23; 652; 654; 6416; 7545
829	BLOC1S2	-0.612577	-0.526328	0.000688866	0.00300749	-0.955184	-1.71448	1779	4	BLOC1S2_3; BLOC1S2_4; BLOC1S2_1; BLOC1S2_2	4	282991	Q6QNY1	344	282991	55763	Q9NV70	BLOC1S2	EXOC1	1.67972e-05	0.0376323	0.962351	14	5	BLOC-1 (biogenesis of lysosome-related organelles complex 1); AP3-BLOC1 complex; BLOC1-BLOC2 complex; dysbindin-Snapin-BLOS2 complex; BORC complex	8; 15; 11; 3; 8	3; 3; 3; 2; 8	23; 652; 654; 6416; 7545
830	BLOC1S2	-0.612577	-0.526328	0.000688866	0.00300749	-0.955184	-1.71448	1779	4	BLOC1S2_3; BLOC1S2_4; BLOC1S2_1; BLOC1S2_2	4	282991	Q6QNY1	344	282991	54785	Q96GS4	BLOC1S2	C17orf59	1.14619e-11	2.20782e-06	0.999998	14	5	BLOC-1 (biogenesis of lysosome-related organelles complex 1); AP3-BLOC1 complex; BLOC1-BLOC2 complex; dysbindin-Snapin-BLOS2 complex; BORC complex	8; 15; 11; 3; 8	3; 3; 3; 2; 8	23; 652; 654; 6416; 7545
831	COLGALT1	-0.610488	-0.590425	0.00137483	0.00457851	-0.969905	-1.61698	3502	3	COLGALT1_4; COLGALT1_2; COLGALT1_3	4	79709	Q8NBJ5	346	79709	8985	O60568	COLGALT1	PLOD3	1.37469e-12	0.00129075	0.998709	1	1	ADIPOQ-PLOD3-GLT25D1 complex	3	2	6997
832	MAGT1	-0.610214	-0.663417	0.00532624	0.0111285	-0.948512	-1.58132	13570	3	MAGT1_3; MAGT1_4; MAGT1_1	4	84061	Q9H0U3	347	84061	6185	P04844	MAGT1	RPN2	1.8117e-30	0.0887943	0.911206	2	2	Oligosaccharyltransferase complex (Stt3A variant); Oligosaccharyltransferase complex (Stt3B variant)	6; 7	3; 4	1199; 1200
833	MAGT1	-0.610214	-0.663417	0.00532624	0.0111285	-0.948512	-1.58132	13570	3	MAGT1_3; MAGT1_4; MAGT1_1	4	84061	Q9H0U3	347	84061	10959	Q15363	MAGT1	TMED2	1.11676e-05	0.22158	0.778409	2	2	Oligosaccharyltransferase complex (Stt3A variant); Oligosaccharyltransferase complex (Stt3B variant)	6; 7	3; 4	1199; 1200
834	MOB4	-0.609303	-0.749703	0.00936204	0.0161135	-0.935651	-1.55988	23853	3	MOB4_4; MOB4_2; MOB4_1	4	25843	Q9Y3A3	348	25843	6801	O43815	MOB4	STRN	7.28234e-08	1.09278e-07	1	3
835	MOB4	-0.609303	-0.749703	0.00936204	0.0161135	-0.935651	-1.55988	23853	3	MOB4_4; MOB4_2; MOB4_1	4	25843	Q9Y3A3	348	25843	9342	O95721	MOB4	SNAP29	1.30127e-05	0.000358368	0.999629	3
836	MOB4	-0.609303	-0.749703	0.00936204	0.0161135	-0.935651	-1.55988	23853	3	MOB4_4; MOB4_2; MOB4_1	4	25843	Q9Y3A3	348	25843	5518	P30153	MOB4	PPP2R1A	2.11216e-11	8.04365e-06	0.999992	3
837	WBP4	-0.609234	-0.609234	0.00762371	0.0141049	-0.974661	-1.47287	19203	2	WBP4_1; WBP4_2	4	11193	O75554	349	11193	25804	Q9Y4Z0	WBP4	LSM4	1.71508e-15	0.00234037	0.99766	1
838	BECN1	-0.608606	-0.608606	0.00584244	0.0118794	-0.978309	-1.47838	14716	2	BECN1_3; BECN1_2	4	8678	Q14457	351	8678	112869	Q96ES7	BECN1	CCDC101	1.01935e-07	3.67727e-06	0.999996	1	1	Bcl-2-Beclin1-UVRAG-PI(3)KC3 complex	5	2	6472
839	ATP6V1C1	-0.604723	-0.470527	0.00438863	0.00969832	-0.952374	-1.58776	11181	3	ATP6V1C1_3; ATP6V1C1_4; ATP6V1C1_2	4	528	P21283	355	528	9550	O75348	ATP6V1C1	ATP6V1G1	2.88872e-13	3.58784e-06	0.999996	3
840	ATP6V1C1	-0.604723	-0.470527	0.00438863	0.00969832	-0.952374	-1.58776	11181	3	ATP6V1C1_3; ATP6V1C1_4; ATP6V1C1_2	4	528	P21283	355	528	10159	O75787	ATP6V1C1	ATP6AP2	6.86985e-11	0.154967	0.845033	3
841	ATP6V1C1	-0.604723	-0.470527	0.00438863	0.00969832	-0.952374	-1.58776	11181	3	ATP6V1C1_3; ATP6V1C1_4; ATP6V1C1_2	4	528	P21283	355	528	51382	Q9Y5K8	ATP6V1C1	ATP6V1D	1.49953e-13	6.62587e-06	0.999993	3
842	MNAT1	-0.604423	-0.535109	0.00095319	0.00364965	-0.950201	-1.70554	2462	4	MNAT1_2; MNAT1_1; MNAT1_4; MNAT1_3	4	4331	P51948	356	4331	902	P51946	MNAT1	CCNH	6.49267e-19	1.07467e-12	1	3	5	TFIIH transcription factor complex; CAK complex (Cdk-activating kinase complex); TFIIH transcription factor complex; CAK-ERCC2 complex; ESR1-CDK7-CCNH-MNAT1-MTA1-HDAC2 complex	19; 3; 19; 4; 6	7; 2; 7; 2; 2	107; 1008; 1029; 1030; 2657
843	MNAT1	-0.604423	-0.535109	0.00095319	0.00364965	-0.950201	-1.70554	2462	4	MNAT1_2; MNAT1_1; MNAT1_4; MNAT1_3	4	4331	P51948	356	4331	2968	Q92759	MNAT1	GTF2H4	6.71609e-06	0.00761681	0.992376	3	5	TFIIH transcription factor complex; CAK complex (Cdk-activating kinase complex); TFIIH transcription factor complex; CAK-ERCC2 complex; ESR1-CDK7-CCNH-MNAT1-MTA1-HDAC2 complex	19; 3; 19; 4; 6	7; 2; 7; 2; 2	107; 1008; 1029; 1030; 2657
844	MNAT1	-0.604423	-0.535109	0.00095319	0.00364965	-0.950201	-1.70554	2462	4	MNAT1_2; MNAT1_1; MNAT1_4; MNAT1_3	4	4331	P51948	356	4331	29925	Q9Y5P6	MNAT1	GMPPB	0.00304187	0.0686323	0.928326	3	5	TFIIH transcription factor complex; CAK complex (Cdk-activating kinase complex); TFIIH transcription factor complex; CAK-ERCC2 complex; ESR1-CDK7-CCNH-MNAT1-MTA1-HDAC2 complex	19; 3; 19; 4; 6	7; 2; 7; 2; 2	107; 1008; 1029; 1030; 2657
845	EP300	-0.60431	-0.551499	0.00242234	0.00652028	-0.962325	-1.60435	6171	3	EP300_1; EP300_2; EP300_3	4	2033	Q09472	357	2033	3312	P11142	EP300	HSPA8	1.20964e-06	0.0084259	0.991573	1	21	Multisubunit ACTR coactivator complex; p300-MDM2-p53 protein complex; p300-CBP-p270-SWI/SNF complex; p300-CBP-p270 complex; p33ING1b-p300 complex; ING1-p300-PCNA complex; pRb2/p130-multimolecular complex (RB2, E2F5, HDAC1, SUV39H1, P300); p300-SMAD1-STAT3 complex; PIAS3-SMAD3-P300 complex; HES1 promoter corepressor complex; HES1 promoter-Notch enhancer complex; SMAD1-P300 complex; RBL2 complex (E…	4; 3; 7; 3; 2; 3; 5; 3; 3; 6; 13; 2; 6; 5; 3; 2; 3; 4; 3; 18; 18	2; 1; 5; 3; 1; 1; 1; 1; 1; 2; 2; 1; 1; 1; 1; 2; 1; 1; 1; 2; 2	4; 98; 570; 571; 1158; 1160; 1471; 1521; 1831; 2638; 2639; 2642; 5118; 5260; 5261; 5375; 6502; 6653; 7328; 7581; 7582
846	COPS3	-0.602917	-0.602917	0.00624101	0.0123219	-0.977443	-1.47708	15720	2	COPS3_4; COPS3_2	4	8533	Q9UNS2	359	8533	51138	Q9BT78	COPS3	COPS4	1.58301e-12	7.21474e-06	0.999993	2	4	DDB2 complex; CSA complex; CSA-POLIIa complex; COP9 signalosome complex	12; 12; 13; 8	2; 2; 2; 2	726; 727; 728; 2174
847	COPS3	-0.602917	-0.602917	0.00624101	0.0123219	-0.977443	-1.47708	15720	2	COPS3_4; COPS3_2	4	8533	Q9UNS2	359	8533	6794	Q15831	COPS3	STK11	1.03505e-11	0.141507	0.858493	2	4	DDB2 complex; CSA complex; CSA-POLIIa complex; COP9 signalosome complex	12; 12; 13; 8	2; 2; 2; 2	726; 727; 728; 2174
848	RPRD2	-0.602765	-0.612578	0.00145921	0.00479264	-0.969224	-1.61585	3717	3	RPRD2_4; RPRD2_3; RPRD2_2	4	23248	Q5VT52	360	23248	58490	Q9NQG5	RPRD2	RPRD1B	2.13436e-12	4.01702e-09	1	2
849	RPRD2	-0.602765	-0.612578	0.00145921	0.00479264	-0.969224	-1.61585	3717	3	RPRD2_4; RPRD2_3; RPRD2_2	4	23248	Q5VT52	360	23248	3312	P11142	RPRD2	HSPA8	6.69773e-24	0.000620007	0.99938	2
850	C12orf4	-0.601196	-0.605576	0.000136225	0.00112404	-0.972361	-1.74531	351	4	C12orf4_3; C12orf4_2; C12orf4_4; C12orf4_1	4	57102	Q9NQ89	361	57102	129285	Q6ZMI0	C12orf4	PPP1R21	1.15377e-10	3.26578e-09	1	1
851	ELP4	-0.600315	-0.583978	0.00119351	0.00418826	-0.971481	-1.61961	3040	3	ELP4_4; ELP4_3; ELP4_2	4	26610	Q96EB1	362	26610	3312	P11142	ELP4	HSPA8	2.01675e-14	0.0112417	0.988758	4	1	Elongator holo complex	4	4	1380
852	ELP4	-0.600315	-0.583978	0.00119351	0.00418826	-0.971481	-1.61961	3040	3	ELP4_4; ELP4_3; ELP4_2	4	26610	Q96EB1	362	26610	10273	Q9UNE7	ELP4	STUB1	7.97258e-16	0.210787	0.789213	4	1	Elongator holo complex	4	4	1380
853	ELP4	-0.600315	-0.583978	0.00119351	0.00418826	-0.971481	-1.61961	3040	3	ELP4_4; ELP4_3; ELP4_2	4	26610	Q96EB1	362	26610	23587	Q8TE02	ELP4	ELP5	0.004022	1.1279e-05	0.995967	4	1	Elongator holo complex	4	4	1380
854	ELP4	-0.600315	-0.583978	0.00119351	0.00418826	-0.971481	-1.61961	3040	3	ELP4_4; ELP4_3; ELP4_2	4	26610	Q96EB1	362	26610	55140	Q9H9T3	ELP4	ELP3	7.04703e-12	5.86354e-06	0.999994	4	1	Elongator holo complex	4	4	1380
855	CREBBP	-0.599044	-0.637175	0.00218686	0.00611636	-0.963886	-1.60695	5571	3	CREBBP_1; CREBBP_4; CREBBP_3	4	1387	Q92793	363	1387	1026	P38936	CREBBP	CDKN1A	2.31077e-07	0.0218383	0.978161	2	21	Multisubunit ACTR coactivator complex; p300-CBP-p270-SWI/SNF complex; p300-CBP-p270 complex; HES1 promoter corepressor complex; CREBBP-KAT2B-MYOD1 complex; SRC-3 complex; SRC-1 complex; RSmad complex; SMAD1-CBP complex; RNA polymerase II complex, (CBP, RPBI, PCAF, BAF47), chromatin structure modifying; RNA polymerase II complex, chromatin structure modifying; MASH1 promoter-coactivator complex; C…	4; 7; 3; 6; 3; 7; 4; 10; 2; 4; 38; 9; 8; 2; 2; 3; 3; 3; 3; 2; 2	2; 5; 3; 2; 1; 1; 1; 3; 1; 2; 6; 1; 1; 1; 1; 1; 1; 1; 1; 1; 1	4; 570; 571; 2638; 2641; 2727; 2728; 2829; 2958; 3062; 3066; 3137; 3142; 3749; 3750; 3753; 3754; 5198; 5264; 5573; 6590
856	CREBBP	-0.599044	-0.637175	0.00218686	0.00611636	-0.963886	-1.60695	5571	3	CREBBP_1; CREBBP_4; CREBBP_3	4	1387	Q92793	363	1387	51061	Q6PKC3	CREBBP	TXNDC11	6.50966e-07	0.0101266	0.989873	2	21	Multisubunit ACTR coactivator complex; p300-CBP-p270-SWI/SNF complex; p300-CBP-p270 complex; HES1 promoter corepressor complex; CREBBP-KAT2B-MYOD1 complex; SRC-3 complex; SRC-1 complex; RSmad complex; SMAD1-CBP complex; RNA polymerase II complex, (CBP, RPBI, PCAF, BAF47), chromatin structure modifying; RNA polymerase II complex, chromatin structure modifying; MASH1 promoter-coactivator complex; C…	4; 7; 3; 6; 3; 7; 4; 10; 2; 4; 38; 9; 8; 2; 2; 3; 3; 3; 3; 2; 2	2; 5; 3; 2; 1; 1; 1; 3; 1; 2; 6; 1; 1; 1; 1; 1; 1; 1; 1; 1; 1	4; 570; 571; 2638; 2641; 2727; 2728; 2829; 2958; 3062; 3066; 3137; 3142; 3749; 3750; 3753; 3754; 5198; 5264; 5573; 6590
857	NOP16	-0.598031	-0.598031	0.0110755	0.0179008	-0.968642	-1.46378	27898	2	NOP16_4; NOP16_1	4	51491	Q9Y3C1	365	51491	11103	Q13601	NOP16	KRR1	2.90363e-22	0.00907884	0.990921	6
858	NOP16	-0.598031	-0.598031	0.0110755	0.0179008	-0.968642	-1.46378	27898	2	NOP16_4; NOP16_1	4	51491	Q9Y3C1	365	51491	6223	P39019	NOP16	RPS19	3.62265e-31	0.088822	0.911178	6
859	NOP16	-0.598031	-0.598031	0.0110755	0.0179008	-0.968642	-1.46378	27898	2	NOP16_4; NOP16_1	4	51491	Q9Y3C1	365	51491	9045	P50914	NOP16	RPL14	1.73554e-23	0.0477978	0.952202	6
860	NOP16	-0.598031	-0.598031	0.0110755	0.0179008	-0.968642	-1.46378	27898	2	NOP16_4; NOP16_1	4	51491	Q9Y3C1	365	51491	6426	Q07955	NOP16	SRSF1	1.87231e-13	0.0334622	0.966538	6
861	NOP16	-0.598031	-0.598031	0.0110755	0.0179008	-0.968642	-1.46378	27898	2	NOP16_4; NOP16_1	4	51491	Q9Y3C1	365	51491	23144	Q8IXZ2	NOP16	ZC3H3	1.00062e-11	0.0676471	0.932353	6
862	NOP16	-0.598031	-0.598031	0.0110755	0.0179008	-0.968642	-1.46378	27898	2	NOP16_4; NOP16_1	4	51491	Q9Y3C1	365	51491	3921	P08865	NOP16	RPSA	1.94997e-33	0.0153938	0.984606	6
863	TSEN54	-0.597215	-0.616338	0.00151102	0.00487798	-0.96877	-1.61509	3849	3	TSEN54_3; TSEN54_4; TSEN54_2	4	283989	Q7Z6J9	367	283989	116461	Q8WW01	TSEN54	TSEN15	4.5711e-16	0.000596443	0.999404	2	2	tRNA splicing endonuclease; RNA endonuclease (SEN2deltaEx8, SEN54, CLP1)	5; 3	3; 2	5283; 5284
864	TSEN54	-0.597215	-0.616338	0.00151102	0.00487798	-0.96877	-1.61509	3849	3	TSEN54_3; TSEN54_4; TSEN54_2	4	283989	Q7Z6J9	367	283989	80746	Q8NCE0	TSEN54	TSEN2	1.20831e-15	0.000109404	0.999891	2	2	tRNA splicing endonuclease; RNA endonuclease (SEN2deltaEx8, SEN54, CLP1)	5; 3	3; 2	5283; 5284
865	SBNO1	-0.596751	-0.596751	0.00516399	0.0108748	-0.979786	-1.48062	13007	2	SBNO1_1; SBNO1_4	4	55206	A3KN83	369	55206	5573	P10644	SBNO1	PRKAR1A	2.14802e-14	0.0498613	0.950139	2
866	SBNO1	-0.596751	-0.596751	0.00516399	0.0108748	-0.979786	-1.48062	13007	2	SBNO1_1; SBNO1_4	4	55206	A3KN83	369	55206	3312	P11142	SBNO1	HSPA8	5.82961e-23	0.00131641	0.998684	2
867	ALG8	-0.596235	-0.433376	0.00246944	0.0066012	-0.962041	-1.60387	6291	3	ALG8_2; ALG8_3; ALG8_4	4	79053	Q9BVK2	370	79053	29929	Q9Y672	ALG8	ALG6	2.40129e-12	0.00492285	0.995077	1
868	BLOC1S1	-0.595535	-0.595535	0.0706198	0.0719257	-0.906793	-1.37031	177889	2	BLOC1S1_4; BLOC1S1_3	4	2647	P78537	371	2647	55004	Q6IAA8	BLOC1S1	LAMTOR1	4.60288e-21	0.00207002	0.99793	12	5	BLOC-1 (biogenesis of lysosome-related organelles complex 1); AP3-BLOC1 complex; BLOC1-BLOC2 complex; pallidin-Cappuccino-BLOS1 complex; BORC complex	8; 15; 11; 3; 8	3; 3; 3; 1; 8	23; 652; 654; 6415; 7545
869	BLOC1S1	-0.595535	-0.595535	0.0706198	0.0719257	-0.906793	-1.37031	177889	2	BLOC1S1_4; BLOC1S1_3	4	2647	P78537	371	2647	282991	Q6QNY1	BLOC1S1	BLOC1S2	4.83564e-07	4.98767e-08	0.999999	12	5	BLOC-1 (biogenesis of lysosome-related organelles complex 1); AP3-BLOC1 complex; BLOC1-BLOC2 complex; pallidin-Cappuccino-BLOS1 complex; BORC complex	8; 15; 11; 3; 8	3; 3; 3; 1; 8	23; 652; 654; 6415; 7545
870	BLOC1S1	-0.595535	-0.595535	0.0706198	0.0719257	-0.906793	-1.37031	177889	2	BLOC1S1_4; BLOC1S1_3	4	2647	P78537	371	2647	118426	Q969J3	BLOC1S1	LOH12CR1	3.9555e-14	4.78474e-07	1	12	5	BLOC-1 (biogenesis of lysosome-related organelles complex 1); AP3-BLOC1 complex; BLOC1-BLOC2 complex; pallidin-Cappuccino-BLOS1 complex; BORC complex	8; 15; 11; 3; 8	3; 3; 3; 1; 8	23; 652; 654; 6415; 7545
871	BLOC1S1	-0.595535	-0.595535	0.0706198	0.0719257	-0.906793	-1.37031	177889	2	BLOC1S1_4; BLOC1S1_3	4	2647	P78537	371	2647	54785	Q96GS4	BLOC1S1	C17orf59	6.74364e-20	3.05787e-13	1	12	5	BLOC-1 (biogenesis of lysosome-related organelles complex 1); AP3-BLOC1 complex; BLOC1-BLOC2 complex; pallidin-Cappuccino-BLOS1 complex; BORC complex	8; 15; 11; 3; 8	3; 3; 3; 1; 8	23; 652; 654; 6415; 7545
872	BLOC1S1	-0.595535	-0.595535	0.0706198	0.0719257	-0.906793	-1.37031	177889	2	BLOC1S1_4; BLOC1S1_3	4	2647	P78537	371	2647	10542	O43504	BLOC1S1	LAMTOR5	8.28736e-18	0.0102406	0.989759	12	5	BLOC-1 (biogenesis of lysosome-related organelles complex 1); AP3-BLOC1 complex; BLOC1-BLOC2 complex; pallidin-Cappuccino-BLOS1 complex; BORC complex	8; 15; 11; 3; 8	3; 3; 3; 1; 8	23; 652; 654; 6415; 7545
873	BLOC1S1	-0.595535	-0.595535	0.0706198	0.0719257	-0.906793	-1.37031	177889	2	BLOC1S1_4; BLOC1S1_3	4	2647	P78537	371	2647	79036	Q9BQD3	BLOC1S1	KXD1	5.55296e-19	3.2339e-11	1	12	5	BLOC-1 (biogenesis of lysosome-related organelles complex 1); AP3-BLOC1 complex; BLOC1-BLOC2 complex; pallidin-Cappuccino-BLOS1 complex; BORC complex	8; 15; 11; 3; 8	3; 3; 3; 1; 8	23; 652; 654; 6415; 7545
874	BLOC1S1	-0.595535	-0.595535	0.0706198	0.0719257	-0.906793	-1.37031	177889	2	BLOC1S1_4; BLOC1S1_3	4	2647	P78537	371	2647	23557	O95295	BLOC1S1	SNAPIN	9.69156e-13	3.75039e-06	0.999996	12	5	BLOC-1 (biogenesis of lysosome-related organelles complex 1); AP3-BLOC1 complex; BLOC1-BLOC2 complex; pallidin-Cappuccino-BLOS1 complex; BORC complex	8; 15; 11; 3; 8	3; 3; 3; 1; 8	23; 652; 654; 6415; 7545
875	BLOC1S1	-0.595535	-0.595535	0.0706198	0.0719257	-0.906793	-1.37031	177889	2	BLOC1S1_4; BLOC1S1_3	4	2647	P78537	371	2647	389541	Q0VGL1	BLOC1S1	LAMTOR4	9.03276e-10	0.00450281	0.995497	12	5	BLOC-1 (biogenesis of lysosome-related organelles complex 1); AP3-BLOC1 complex; BLOC1-BLOC2 complex; pallidin-Cappuccino-BLOS1 complex; BORC complex	8; 15; 11; 3; 8	3; 3; 3; 1; 8	23; 652; 654; 6415; 7545
876	BLOC1S1	-0.595535	-0.595535	0.0706198	0.0719257	-0.906793	-1.37031	177889	2	BLOC1S1_4; BLOC1S1_3	4	2647	P78537	371	2647	119032	Q96B45	BLOC1S1	C10orf32	2.71649e-21	1.54997e-14	1	12	5	BLOC-1 (biogenesis of lysosome-related organelles complex 1); AP3-BLOC1 complex; BLOC1-BLOC2 complex; pallidin-Cappuccino-BLOS1 complex; BORC complex	8; 15; 11; 3; 8	3; 3; 3; 1; 8	23; 652; 654; 6415; 7545
877	BLOC1S1	-0.595535	-0.595535	0.0706198	0.0719257	-0.906793	-1.37031	177889	2	BLOC1S1_4; BLOC1S1_3	4	2647	P78537	371	2647	729991	Q96FH0	BLOC1S1	MEF2BNB	1.79569e-18	4.21379e-12	1	12	5	BLOC-1 (biogenesis of lysosome-related organelles complex 1); AP3-BLOC1 complex; BLOC1-BLOC2 complex; pallidin-Cappuccino-BLOS1 complex; BORC complex	8; 15; 11; 3; 8	3; 3; 3; 1; 8	23; 652; 654; 6415; 7545
878	BLOC1S1	-0.595535	-0.595535	0.0706198	0.0719257	-0.906793	-1.37031	177889	2	BLOC1S1_4; BLOC1S1_3	4	2647	P78537	371	2647	51019	Q9Y3C0	BLOC1S1	CCDC53	3.8345e-05	0.0393724	0.960589	12	5	BLOC-1 (biogenesis of lysosome-related organelles complex 1); AP3-BLOC1 complex; BLOC1-BLOC2 complex; pallidin-Cappuccino-BLOS1 complex; BORC complex	8; 15; 11; 3; 8	3; 3; 3; 1; 8	23; 652; 654; 6415; 7545
879	BLOC1S1	-0.595535	-0.595535	0.0706198	0.0719257	-0.906793	-1.37031	177889	2	BLOC1S1_4; BLOC1S1_3	4	2647	P78537	371	2647	55845	Q8WUW1	BLOC1S1	BRK1	6.80507e-05	0.00994252	0.989989	12	5	BLOC-1 (biogenesis of lysosome-related organelles complex 1); AP3-BLOC1 complex; BLOC1-BLOC2 complex; pallidin-Cappuccino-BLOS1 complex; BORC complex	8; 15; 11; 3; 8	3; 3; 3; 1; 8	23; 652; 654; 6415; 7545
880	EIF3I	-0.591373	-0.591373	0.00720926	0.0135319	-0.97547	-1.47409	18159	2	EIF3I_2; EIF3I_4	4	8668	Q13347	373	8668	8667	O15372	EIF3I	EIF3H	1.0883e-24	6.41099e-10	1	3	6	eIF3 complex (EIF3S6, EIF3S5, EIF3S4, EIF3S3, EIF3S6IP, EIF3S2, EIF3S9, EIF3S12, EIF3S10, EIF3S8, EIF3S1, EIF3S7, PCID1); EIF3 core complex (EIF3A, EIF3B, EIF3G, EIF3I); EIF3 complex (EIF3A, EIF3B, EIF3G, EIF3I, EIF3C); EIF3 complex (EIF3B, EIF3G, EIF3I); EIF3 complex (EIF3B, EIF3J, EIF3I); EIF3 complex (EIF3A, EIF3B, EIF3G, EIF3I, EIF3J)	13; 4; 5; 3; 3; 5	3; 1; 1; 1; 1; 1	1097; 4389; 4392; 4395; 4399; 4403
881	EIF3I	-0.591373	-0.591373	0.00720926	0.0135319	-0.97547	-1.47409	18159	2	EIF3I_2; EIF3I_4	4	8668	Q13347	373	8668	8664	O15371	EIF3I	EIF3D	3.05716e-28	6.73258e-08	1	3	6	eIF3 complex (EIF3S6, EIF3S5, EIF3S4, EIF3S3, EIF3S6IP, EIF3S2, EIF3S9, EIF3S12, EIF3S10, EIF3S8, EIF3S1, EIF3S7, PCID1); EIF3 core complex (EIF3A, EIF3B, EIF3G, EIF3I); EIF3 complex (EIF3A, EIF3B, EIF3G, EIF3I, EIF3C); EIF3 complex (EIF3B, EIF3G, EIF3I); EIF3 complex (EIF3B, EIF3J, EIF3I); EIF3 complex (EIF3A, EIF3B, EIF3G, EIF3I, EIF3J)	13; 4; 5; 3; 3; 5	3; 1; 1; 1; 1; 1	1097; 4389; 4392; 4395; 4399; 4403
882	EIF3I	-0.591373	-0.591373	0.00720926	0.0135319	-0.97547	-1.47409	18159	2	EIF3I_2; EIF3I_4	4	8668	Q13347	373	8668	79269	Q5QP82	EIF3I	DCAF10	1.41249e-15	0.00222061	0.997779	3	6	eIF3 complex (EIF3S6, EIF3S5, EIF3S4, EIF3S3, EIF3S6IP, EIF3S2, EIF3S9, EIF3S12, EIF3S10, EIF3S8, EIF3S1, EIF3S7, PCID1); EIF3 core complex (EIF3A, EIF3B, EIF3G, EIF3I); EIF3 complex (EIF3A, EIF3B, EIF3G, EIF3I, EIF3C); EIF3 complex (EIF3B, EIF3G, EIF3I); EIF3 complex (EIF3B, EIF3J, EIF3I); EIF3 complex (EIF3A, EIF3B, EIF3G, EIF3I, EIF3J)	13; 4; 5; 3; 3; 5	3; 1; 1; 1; 1; 1	1097; 4389; 4392; 4395; 4399; 4403
883	BRD7	-0.591054	-0.591054	0.00858839	0.0152428	-0.972887	-1.47019	21633	2	BRD7_1; BRD7_4	4	29117	Q9NPI1	374	29117	6598	Q12824	BRD7	SMARCB1	7.53869e-15	1.08392e-07	1	2	5	BRD7-SWI\u2013SNF complex; BRD7-SWI\u2013SNF-SUZ12 complex; BRD7-BAF60A-MEP50 complex; BRD7-EZH2-SUZ12 complex; BRD7-CBP-SWI\u2013SNF complex	11; 5; 3; 3; 7	3; 2; 1; 2; 1	7372; 7373; 7374; 7375; 7376
884	BRD7	-0.591054	-0.591054	0.00858839	0.0152428	-0.972887	-1.47019	21633	2	BRD7_1; BRD7_4	4	29117	Q9NPI1	374	29117	6601	Q8TAQ2	BRD7	SMARCC2	1.30445e-14	1.47283e-08	1	2	5	BRD7-SWI\u2013SNF complex; BRD7-SWI\u2013SNF-SUZ12 complex; BRD7-BAF60A-MEP50 complex; BRD7-EZH2-SUZ12 complex; BRD7-CBP-SWI\u2013SNF complex	11; 5; 3; 3; 7	3; 2; 1; 2; 1	7372; 7373; 7374; 7375; 7376
885	DAXX	-0.590336	-0.590336	0.015037	0.0217505	-0.962481	-1.45447	37877	2	DAXX_4; DAXX_2	4	1616	Q9UER7	375	1616	25942	Q96ST3	DAXX	SIN3A	3.03146e-15	0.0396757	0.960324	11	7	Ubiquitin E3 ligase (SPOP, DAXX, CUL3); ATRX-DAXX complex; DAXX-Axin-p53-HIPK2 complex; ATRX-DAXX complex; DAXX-AXIN complex; Daxx-Axin-p53 complex; DAXX-MDM2-USP7 complex	3; 4; 4; 4; 2; 3; 3	1; 2; 1; 2; 1; 1; 1	1243; 2839; 2842; 2843; 3168; 3170; 6127
886	DAXX	-0.590336	-0.590336	0.015037	0.0217505	-0.962481	-1.45447	37877	2	DAXX_4; DAXX_2	4	1616	Q9UER7	375	1616	57337	Q9BQF6	DAXX	SENP7	1.73995e-08	2.929e-08	1	11	7	Ubiquitin E3 ligase (SPOP, DAXX, CUL3); ATRX-DAXX complex; DAXX-Axin-p53-HIPK2 complex; ATRX-DAXX complex; DAXX-AXIN complex; Daxx-Axin-p53 complex; DAXX-MDM2-USP7 complex	3; 4; 4; 4; 2; 3; 3	1; 2; 1; 2; 1; 1; 1	1243; 2839; 2842; 2843; 3168; 3170; 6127
887	DAXX	-0.590336	-0.590336	0.015037	0.0217505	-0.962481	-1.45447	37877	2	DAXX_4; DAXX_2	4	1616	Q9UER7	375	1616	65095	Q8N9T8	DAXX	KRI1	1.11605e-12	0.174143	0.825857	11	7	Ubiquitin E3 ligase (SPOP, DAXX, CUL3); ATRX-DAXX complex; DAXX-Axin-p53-HIPK2 complex; ATRX-DAXX complex; DAXX-AXIN complex; Daxx-Axin-p53 complex; DAXX-MDM2-USP7 complex	3; 4; 4; 4; 2; 3; 3	1; 2; 1; 2; 1; 1; 1	1243; 2839; 2842; 2843; 3168; 3170; 6127
888	DAXX	-0.590336	-0.590336	0.015037	0.0217505	-0.962481	-1.45447	37877	2	DAXX_4; DAXX_2	4	1616	Q9UER7	375	1616	23067	Q9UPS6	DAXX	SETD1B	3.46425e-09	0.000169882	0.99983	11	7	Ubiquitin E3 ligase (SPOP, DAXX, CUL3); ATRX-DAXX complex; DAXX-Axin-p53-HIPK2 complex; ATRX-DAXX complex; DAXX-AXIN complex; Daxx-Axin-p53 complex; DAXX-MDM2-USP7 complex	3; 4; 4; 4; 2; 3; 3	1; 2; 1; 2; 1; 1; 1	1243; 2839; 2842; 2843; 3168; 3170; 6127
889	DAXX	-0.590336	-0.590336	0.015037	0.0217505	-0.962481	-1.45447	37877	2	DAXX_4; DAXX_2	4	1616	Q9UER7	375	1616	6223	P39019	DAXX	RPS19	1.68874e-26	0.0341065	0.965894	11	7	Ubiquitin E3 ligase (SPOP, DAXX, CUL3); ATRX-DAXX complex; DAXX-Axin-p53-HIPK2 complex; ATRX-DAXX complex; DAXX-AXIN complex; Daxx-Axin-p53 complex; DAXX-MDM2-USP7 complex	3; 4; 4; 4; 2; 3; 3	1; 2; 1; 2; 1; 1; 1	1243; 2839; 2842; 2843; 3168; 3170; 6127
890	DAXX	-0.590336	-0.590336	0.015037	0.0217505	-0.962481	-1.45447	37877	2	DAXX_4; DAXX_2	4	1616	Q9UER7	375	1616	11103	Q13601	DAXX	KRR1	3.80731e-12	0.207523	0.792477	11	7	Ubiquitin E3 ligase (SPOP, DAXX, CUL3); ATRX-DAXX complex; DAXX-Axin-p53-HIPK2 complex; ATRX-DAXX complex; DAXX-AXIN complex; Daxx-Axin-p53 complex; DAXX-MDM2-USP7 complex	3; 4; 4; 4; 2; 3; 3	1; 2; 1; 2; 1; 1; 1	1243; 2839; 2842; 2843; 3168; 3170; 6127
891	DAXX	-0.590336	-0.590336	0.015037	0.0217505	-0.962481	-1.45447	37877	2	DAXX_4; DAXX_2	4	1616	Q9UER7	375	1616	55729	Q6VMQ6	DAXX	ATF7IP	0.000476664	0.000590678	0.998933	11	7	Ubiquitin E3 ligase (SPOP, DAXX, CUL3); ATRX-DAXX complex; DAXX-Axin-p53-HIPK2 complex; ATRX-DAXX complex; DAXX-AXIN complex; Daxx-Axin-p53 complex; DAXX-MDM2-USP7 complex	3; 4; 4; 4; 2; 3; 3	1; 2; 1; 2; 1; 1; 1	1243; 2839; 2842; 2843; 3168; 3170; 6127
892	DAXX	-0.590336	-0.590336	0.015037	0.0217505	-0.962481	-1.45447	37877	2	DAXX_4; DAXX_2	4	1616	Q9UER7	375	1616	30827	Q9P0U4	DAXX	CXXC1	2.3076e-11	0.00150398	0.998496	11	7	Ubiquitin E3 ligase (SPOP, DAXX, CUL3); ATRX-DAXX complex; DAXX-Axin-p53-HIPK2 complex; ATRX-DAXX complex; DAXX-AXIN complex; Daxx-Axin-p53 complex; DAXX-MDM2-USP7 complex	3; 4; 4; 4; 2; 3; 3	1; 2; 1; 2; 1; 1; 1	1243; 2839; 2842; 2843; 3168; 3170; 6127
893	DAXX	-0.590336	-0.590336	0.015037	0.0217505	-0.962481	-1.45447	37877	2	DAXX_4; DAXX_2	4	1616	Q9UER7	375	1616	79050	Q9BVI4	DAXX	NOC4L	0.00100658	0.0716864	0.927307	11	7	Ubiquitin E3 ligase (SPOP, DAXX, CUL3); ATRX-DAXX complex; DAXX-Axin-p53-HIPK2 complex; ATRX-DAXX complex; DAXX-AXIN complex; Daxx-Axin-p53 complex; DAXX-MDM2-USP7 complex	3; 4; 4; 4; 2; 3; 3	1; 2; 1; 2; 1; 1; 1	1243; 2839; 2842; 2843; 3168; 3170; 6127
894	DAXX	-0.590336	-0.590336	0.015037	0.0217505	-0.962481	-1.45447	37877	2	DAXX_4; DAXX_2	4	1616	Q9UER7	375	1616	84295	Q8IWS0	DAXX	PHF6	0.146291	0.0965702	0.757139	11	7	Ubiquitin E3 ligase (SPOP, DAXX, CUL3); ATRX-DAXX complex; DAXX-Axin-p53-HIPK2 complex; ATRX-DAXX complex; DAXX-AXIN complex; Daxx-Axin-p53 complex; DAXX-MDM2-USP7 complex	3; 4; 4; 4; 2; 3; 3	1; 2; 1; 2; 1; 1; 1	1243; 2839; 2842; 2843; 3168; 3170; 6127
895	DAXX	-0.590336	-0.590336	0.015037	0.0217505	-0.962481	-1.45447	37877	2	DAXX_4; DAXX_2	4	1616	Q9UER7	375	1616	84294	Q9BRU9	DAXX	UTP23	0.000111568	0.0922101	0.907678	11	7	Ubiquitin E3 ligase (SPOP, DAXX, CUL3); ATRX-DAXX complex; DAXX-Axin-p53-HIPK2 complex; ATRX-DAXX complex; DAXX-AXIN complex; Daxx-Axin-p53 complex; DAXX-MDM2-USP7 complex	3; 4; 4; 4; 2; 3; 3	1; 2; 1; 2; 1; 1; 1	1243; 2839; 2842; 2843; 3168; 3170; 6127
896	RABGEF1	-0.586841	-0.399237	0.00442316	0.00974457	-0.952232	-1.58752	11269	3	RABGEF1_3; RABGEF1_4; RABGEF1_1	4	27342	Q9UJ41	378	27342	329	Q13490	RABGEF1	BIRC2	3.73975e-15	0.00151957	0.99848	5	1	RAB5-RABAPTIN5\u2013RABEX5 complex	3	1	50
897	RABGEF1	-0.586841	-0.399237	0.00442316	0.00974457	-0.952232	-1.58752	11269	3	RABGEF1_3; RABGEF1_4; RABGEF1_1	4	27342	Q9UJ41	378	27342	7186	Q12933	RABGEF1	TRAF2	2.43191e-08	0.0311671	0.968833	5	1	RAB5-RABAPTIN5\u2013RABEX5 complex	3	1	50
898	RABGEF1	-0.586841	-0.399237	0.00442316	0.00974457	-0.952232	-1.58752	11269	3	RABGEF1_3; RABGEF1_4; RABGEF1_1	4	27342	Q9UJ41	378	27342	23011	Q9UL25	RABGEF1	RAB21	3.70152e-14	0.0153411	0.984659	5	1	RAB5-RABAPTIN5\u2013RABEX5 complex	3	1	50
899	RABGEF1	-0.586841	-0.399237	0.00442316	0.00974457	-0.952232	-1.58752	11269	3	RABGEF1_3; RABGEF1_4; RABGEF1_1	4	27342	Q9UJ41	378	27342	11119	O00481	RABGEF1	BTN3A1	6.87635e-10	0.00208588	0.997914	5	1	RAB5-RABAPTIN5\u2013RABEX5 complex	3	1	50
900	RABGEF1	-0.586841	-0.399237	0.00442316	0.00974457	-0.952232	-1.58752	11269	3	RABGEF1_3; RABGEF1_4; RABGEF1_1	4	27342	Q9UJ41	378	27342	55763	Q9NV70	RABGEF1	EXOC1	1.28221e-12	0.00373347	0.996267	5	1	RAB5-RABAPTIN5\u2013RABEX5 complex	3	1	50
901	KMT2C	-0.586007	-0.586007	0.0130033	0.0199218	-0.965533	-1.45908	32754	2	KMT2C_3; KMT2C_2	4	58508	Q8NEZ4	379	58508	5929	Q15291	KMT2C	RBBP5	3.1168e-10	5.7919e-08	1	2	4	ASCOM complex; UTX-MLL2/3 complex; PTIP-HMT complex; MLL3 complex	7; 12; 10; 9	3; 4; 6; 6	1400; 3075; 5195; 6461
902	KMT2C	-0.586007	-0.586007	0.0130033	0.0199218	-0.965533	-1.45908	32754	2	KMT2C_3; KMT2C_2	4	58508	Q8NEZ4	379	58508	9070	Q9UBL3	KMT2C	ASH2L	1.50636e-10	4.09829e-08	1	2	4	ASCOM complex; UTX-MLL2/3 complex; PTIP-HMT complex; MLL3 complex	7; 12; 10; 9	3; 4; 6; 6	1400; 3075; 5195; 6461
903	ATG7	-0.58598	-0.58598	0.00784007	0.0143936	-0.974221	-1.47221	19748	2	ATG7_3; ATG7_2	4	10533	O95352	380	10533	2671	P55789	ATG7	GFER	0.000497566	0.0585972	0.940905	8
904	ATG7	-0.58598	-0.58598	0.00784007	0.0143936	-0.974221	-1.47221	19748	2	ATG7_3; ATG7_2	4	10533	O95352	380	10533	84172	Q9H9Y6	ATG7	POLR1B	1.64377e-14	0.168389	0.831611	8
905	ATG7	-0.58598	-0.58598	0.00784007	0.0143936	-0.974221	-1.47221	19748	2	ATG7_3; ATG7_2	4	10533	O95352	380	10533	22836	O94955	ATG7	RHOBTB3	0.00762553	0.0345525	0.957822	8
906	ATG7	-0.58598	-0.58598	0.00784007	0.0143936	-0.974221	-1.47221	19748	2	ATG7_3; ATG7_2	4	10533	O95352	380	10533	64411	Q8WWN8	ATG7	ARAP3	1.02952e-05	0.0202527	0.979737	8
907	ATG7	-0.58598	-0.58598	0.00784007	0.0143936	-0.974221	-1.47221	19748	2	ATG7_3; ATG7_2	4	10533	O95352	380	10533	10869	O94966	ATG7	USP19	3.45716e-06	0.057689	0.942308	8
908	ATG7	-0.58598	-0.58598	0.00784007	0.0143936	-0.974221	-1.47221	19748	2	ATG7_3; ATG7_2	4	10533	O95352	380	10533	57521	Q8N122	ATG7	RPTOR	7.10001e-06	0.0166595	0.983333	8
909	ATG7	-0.58598	-0.58598	0.00784007	0.0143936	-0.974221	-1.47221	19748	2	ATG7_3; ATG7_2	4	10533	O95352	380	10533	26519	P62072	ATG7	TIMM10	1.12561e-09	0.0891869	0.910813	8
910	ATG7	-0.58598	-0.58598	0.00784007	0.0143936	-0.974221	-1.47221	19748	2	ATG7_3; ATG7_2	4	10533	O95352	380	10533	90060	Q96HB5	ATG7	CCDC120	1.94637e-06	0.197175	0.802824	8
911	XRCC6	-0.585243	-0.585243	0.00614732	0.0122946	-0.977642	-1.47738	15484	2	XRCC6_3; XRCC6_2	4	2547	P12956	381	2547	7520	P13010	XRCC6	XRCC5	1.04988e-09	0.00147835	0.998522	1	23	Ku antigen-NARG1 complex; DNA-PK-Ku complex; Ku antigen complex; PCNA-KU antigen complex; DNA double-strand break end-joining complex; Rap1 complex; TRF2-Ku complex; Vigilin-DNA-PK-Ku antigen complex; TERF2-RAP1 complex; Ku antigen-YY1-alphaMyHC promoter complex; DHX9-ADAR-vigilin-DNA-PK-Ku antigen complex; GammaH2AFX-NDHII-Ku70-DNA complex; XRCC6-XRCC5-WRN complex; MGC1-DNA-PKcs-Ku complex; NCOA…	3; 3; 2; 3; 7; 14; 3; 4; 7; 3; 6; 3; 3; 4; 5; 8; 5; 4; 6; 3; 3; 4; 9	3; 2; 2; 2; 2; 2; 2; 2; 2; 3; 2; 1; 2; 2; 2; 4; 2; 2; 2; 1; 2; 2; 2	95; 322; 328; 1092; 1189; 1193; 1220; 1571; 2766; 2918; 3102; 3618; 4082; 5176; 5179; 5183; 5231; 5235; 5251; 5288; 6310; 7217; 7285
912	SENP7	-0.581359	-0.581359	0.00893059	0.0156153	-0.972262	-1.46925	22495	2	SENP7_3; SENP7_1	4	57337	Q9BQF6	385	57337	1616	Q9UER7	SENP7	DAXX	1.73995e-08	2.929e-08	1	1
913	COMMD5	-0.575509	-0.575509	0.0112768	0.0181851	-0.968316	-1.46328	28405	2	COMMD5_3; COMMD5_2	4	28991	Q9GZQ3	388	28991	57020	Q7Z3J2	COMMD5	C16orf62	5.65284e-11	2.12681e-06	0.999998	9	2	CCC-Wash (WASH1, FAM21C) complex; CCC complex	15; 13	9; 9	6639; 6645
914	COMMD5	-0.575509	-0.575509	0.0112768	0.0181851	-0.968316	-1.46328	28405	2	COMMD5_3; COMMD5_2	4	28991	Q9GZQ3	388	28991	54520	Q567U6	COMMD5	CCDC93	7.51106e-14	1.58112e-06	0.999998	9	2	CCC-Wash (WASH1, FAM21C) complex; CCC complex	15; 13	9; 9	6639; 6645
915	COMMD5	-0.575509	-0.575509	0.0112768	0.0181851	-0.968316	-1.46328	28405	2	COMMD5_3; COMMD5_2	4	28991	Q9GZQ3	388	28991	51397	Q9Y6G5	COMMD5	COMMD10	8.2843e-23	5.12074e-15	1	9	2	CCC-Wash (WASH1, FAM21C) complex; CCC complex	15; 13	9; 9	6639; 6645
916	COMMD5	-0.575509	-0.575509	0.0112768	0.0181851	-0.968316	-1.46328	28405	2	COMMD5_3; COMMD5_2	4	28991	Q9GZQ3	388	28991	51122	Q86X83	COMMD5	COMMD2	3.13311e-24	1.29651e-14	1	9	2	CCC-Wash (WASH1, FAM21C) complex; CCC complex	15; 13	9; 9	6639; 6645
917	COMMD5	-0.575509	-0.575509	0.0112768	0.0181851	-0.968316	-1.46328	28405	2	COMMD5_3; COMMD5_2	4	28991	Q9GZQ3	388	28991	51699	Q9UBQ0	COMMD5	VPS29	2.61659e-25	5.22311e-07	0.999999	9	2	CCC-Wash (WASH1, FAM21C) complex; CCC complex	15; 13	9; 9	6639; 6645
918	COMMD5	-0.575509	-0.575509	0.0112768	0.0181851	-0.968316	-1.46328	28405	2	COMMD5_3; COMMD5_2	4	28991	Q9GZQ3	388	28991	54951	Q9NX08	COMMD5	COMMD8	7.46722e-19	1.25104e-13	1	9	2	CCC-Wash (WASH1, FAM21C) complex; CCC complex	15; 13	9; 9	6639; 6645
919	COMMD5	-0.575509	-0.575509	0.0112768	0.0181851	-0.968316	-1.46328	28405	2	COMMD5_3; COMMD5_2	4	28991	Q9GZQ3	388	28991	28952	O60826	COMMD5	CCDC22	2.00726e-26	1.44325e-12	1	9	2	CCC-Wash (WASH1, FAM21C) complex; CCC complex	15; 13	9; 9	6639; 6645
920	COMMD5	-0.575509	-0.575509	0.0112768	0.0181851	-0.968316	-1.46328	28405	2	COMMD5_3; COMMD5_2	4	28991	Q9GZQ3	388	28991	23412	Q9UBI1	COMMD5	COMMD3	5.23369e-19	1.17922e-13	1	9	2	CCC-Wash (WASH1, FAM21C) complex; CCC complex	15; 13	9; 9	6639; 6645
921	COMMD5	-0.575509	-0.575509	0.0112768	0.0181851	-0.968316	-1.46328	28405	2	COMMD5_3; COMMD5_2	4	28991	Q9GZQ3	388	28991	54939	Q9H0A8	COMMD5	COMMD4	8.8886e-21	1.54093e-11	1	9	2	CCC-Wash (WASH1, FAM21C) complex; CCC complex	15; 13	9; 9	6639; 6645
922	ALG11	-0.573388	-0.381137	0.0105579	0.0173382	-0.9325	-1.55462	26900	3	ALG11_1; ALG11_2; ALG11_3	4	440138	Q2TAA5	391	440138	6541	P30825	ALG11	SLC7A1	4.89878e-10	0.249416	0.750584	1
923	ATP6V1E1	-0.572003	-0.572003	0.00635217	0.0123928	-0.977216	-1.47673	16000	2	ATP6V1E1_4; ATP6V1E1_2	4	529	P36543	392	529	9550	O75348	ATP6V1E1	ATP6V1G1	3.53704e-11	2.0598e-05	0.999979	2
924	ATP6V1E1	-0.572003	-0.572003	0.00635217	0.0123928	-0.977216	-1.47673	16000	2	ATP6V1E1_4; ATP6V1E1_2	4	529	P36543	392	529	51382	Q9Y5K8	ATP6V1E1	ATP6V1D	3.2989e-12	3.54587e-05	0.999965	2
925	NAA15	-0.569283	-0.514022	0.00429836	0.00952825	-0.952728	-1.58835	10951	3	NAA15_2; NAA15_3; NAA15_1	4	80155	Q9BXJ9	395	80155	25764	Q9NX55	NAA15	HYPK	1.54507e-23	1.37014e-13	1	1	2	Ku antigen-NARG1 complex; ARD1-NATH complex	3; 2	3; 1	95; 702
926	MGAT1	-0.56926	-0.56926	0.0235754	0.0293565	-0.951295	-1.43756	59385	2	MGAT1_2; MGAT1_3	4	4245	P26572	396	4245	2531	Q06136	MGAT1	KDSR	1.03507e-11	0.084309	0.915691	1	1	MGAT1-NGT complex	2	1	6619
927	ERP44	-0.568229	-0.548853	0.0128735	0.0198224	-0.926821	-1.54516	32800	3	ERP44_1; ERP44_2; ERP44_3	4	23071	Q9BS26	397	23071	54552	Q9NVN8	ERP44	GNL3L	3.01964e-29	0.041625	0.958375	2
928	ERP44	-0.568229	-0.548853	0.0128735	0.0198224	-0.926821	-1.54516	32800	3	ERP44_1; ERP44_2; ERP44_3	4	23071	Q9BS26	397	23071	10318	Q15025	ERP44	TNIP1	1.40963e-26	0.00293563	0.997064	2
929	USP9X	-0.567612	-0.567612	0.0148004	0.021671	-0.962822	-1.45498	37281	2	USP9X_1; USP9X_3	4	8239	Q93008	401	8239	11060	O00308	USP9X	WWP2	6.6125e-15	0.010134	0.989866	1	1	ITCH-USP9X complex	2	1	783
930	MED26	-0.566001	-0.566001	0.00732121	0.0136867	-0.975229	-1.47373	18441	2	MED26_2; MED26_3	4	9441	O95402	404	9441	54797	Q9BUE0	MED26	MED18	1.31689e-11	2.37413e-07	1	1	7	Mediator complex; ARC complex; CRSP complex; ARC complex; DRIP complex; ARC92-Mediator complex; Mediator complex	59; 30; 11; 30; 14; 13; 59	6; 2; 1; 2; 2; 2; 6	230; 232; 284; 288; 548; 909; 5450
931	RPN2	-0.565843	-0.650786	0.00427442	0.00952825	-0.952814	-1.58849	10890	3	RPN2_1; RPN2_2; RPN2_4	4	6185	P04844	405	6185	746	P61165	RPN2	TMEM258	1.79559e-22	0.00155628	0.998444	4	3	Oligosaccharyltransferase complex (Stt3A variant); Oligosaccharyltransferase complex (Stt3B variant); SELK multiprotein complex	6; 7; 10	3; 4; 4	1199; 1200; 6131
932	RPN2	-0.565843	-0.650786	0.00427442	0.00952825	-0.952814	-1.58849	10890	3	RPN2_1; RPN2_2; RPN2_4	4	6185	P04844	405	6185	1650	P39656	RPN2	DDOST	5.2864e-13	0.00107467	0.998925	4	3	Oligosaccharyltransferase complex (Stt3A variant); Oligosaccharyltransferase complex (Stt3B variant); SELK multiprotein complex	6; 7; 10	3; 4; 4	1199; 1200; 6131
933	RPN2	-0.565843	-0.650786	0.00427442	0.00952825	-0.952814	-1.58849	10890	3	RPN2_1; RPN2_2; RPN2_4	4	6185	P04844	405	6185	201595	Q8TCJ2	RPN2	STT3B	3.88745e-35	0.152288	0.847712	4	3	Oligosaccharyltransferase complex (Stt3A variant); Oligosaccharyltransferase complex (Stt3B variant); SELK multiprotein complex	6; 7; 10	3; 4; 4	1199; 1200; 6131
934	RPN2	-0.565843	-0.650786	0.00427442	0.00952825	-0.952814	-1.58849	10890	3	RPN2_1; RPN2_2; RPN2_4	4	6185	P04844	405	6185	84061	Q9H0U3	RPN2	MAGT1	1.8117e-30	0.0887943	0.911206	4	3	Oligosaccharyltransferase complex (Stt3A variant); Oligosaccharyltransferase complex (Stt3B variant); SELK multiprotein complex	6; 7; 10	3; 4; 4	1199; 1200; 6131
935	VPS54	-0.563877	-0.563877	0.0093514	0.0161135	-0.971495	-1.46809	23555	2	VPS54_4; VPS54_1	4	51542	Q9P1Q0	406	51542	57511	Q9Y2V7	VPS54	COG6	0.04838	0.000292815	0.951327	1	1	GARP complex	4	2	6463
936	TAF3	-0.559753	-0.559753	0.0157119	0.0222767	-0.961516	-1.45301	39577	2	TAF3_1; TAF3_2	4	83860	Q5VWG9	408	83860	6881	Q12962	TAF3	TAF10	0.00460609	0.0100125	0.985381	3	2	DA complex; DAB complex	15; 16	4; 4	492; 493
937	TAF3	-0.559753	-0.559753	0.0157119	0.0222767	-0.961516	-1.45301	39577	2	TAF3_1; TAF3_2	4	83860	Q5VWG9	408	83860	6879	Q15545	TAF3	TAF7	5.918e-13	0.00114769	0.998852	3	2	DA complex; DAB complex	15; 16	4; 4	492; 493
938	TAF3	-0.559753	-0.559753	0.0157119	0.0222767	-0.961516	-1.45301	39577	2	TAF3_1; TAF3_2	4	83860	Q5VWG9	408	83860	6877	Q15542	TAF3	TAF5	6.93417e-13	0.000170874	0.999829	3	2	DA complex; DAB complex	15; 16	4; 4	492; 493
939	UTP20	-0.559623	-0.559623	0.0131736	0.0200261	-0.965264	-1.45867	33183	2	UTP20_1; UTP20_2	4	27340	O75691	409	27340	10899	O76095	UTP20	JTB	4.19502e-12	0.000733227	0.999267	1
940	EMC1	-0.559344	-0.559344	0.0314492	0.0363188	-0.942239	-1.42388	79219	2	EMC1_2; EMC1_1	4	23065	Q8N766	410	23065	10959	Q15363	EMC1	TMED2	2.76474e-23	5.5303e-05	0.999945	1
941	JTB	-0.558106	-0.491237	0.00375277	0.00887646	-0.924989	-1.66028	9696	4	JTB_3; JTB_1; JTB_2; JTB_4	4	10899	O76095	411	10899	27340	O75691	JTB	UTP20	4.19502e-12	0.000733227	0.999267	3
942	JTB	-0.558106	-0.491237	0.00375277	0.00887646	-0.924989	-1.66028	9696	4	JTB_3; JTB_1; JTB_2; JTB_4	4	10899	O76095	411	10899	57117	Q96CB8	JTB	INTS12	1.46357e-08	0.201738	0.798262	3
943	JTB	-0.558106	-0.491237	0.00375277	0.00887646	-0.924989	-1.66028	9696	4	JTB_3; JTB_1; JTB_2; JTB_4	4	10899	O76095	411	10899	84259	Q9BTE7	JTB	DCUN1D5	3.27889e-05	0.0414815	0.958486	3
944	SIAH1	-0.557919	-0.494511	0.00147797	0.00483207	-0.943287	-1.69313	3818	4	SIAH1_1; SIAH1_4; SIAH1_2; SIAH1_3	4	6477	Q8IUQ4	412	6477	10869	O94966	SIAH1	USP19	1.96084e-06	0.123872	0.876126	1	1	Ubiquitin E3 ligase (SIAH1, SIP, SKP1A, TBL1X)	4	1	1255
945	JUN	-0.555183	-0.407092	0.00353343	0.00854708	-0.956206	-1.59415	9002	3	JUN_2; JUN_4; JUN_3	4	3725	P05412	413	3725	3726	P17275	JUN	JUNB	2.59575e-05	0.00123984	0.998734	3	8	SMAD3-SMAD4-cJun-cFos complex; NFAT-JUN-FOS DNA-protein complex; ERG-JUN-FOS DNA-protein complex; ETS2-FOS-JUN complex; ESR1-JUN-GRIP1 complex; ESR1-JUN complex; SMAD3-SMAD4-cJUN complex; JUN-FBW7-PRR7 complex	4; 3; 3; 3; 3; 2; 3; 3	1; 1; 1; 1; 1; 1; 1; 1	2692; 2693; 2694; 2695; 2699; 2700; 2708; 6975
946	JUN	-0.555183	-0.407092	0.00353343	0.00854708	-0.956206	-1.59415	9002	3	JUN_2; JUN_4; JUN_3	4	3725	P05412	413	3725	2355	P15408	JUN	FOSL2	4.33185e-13	8.53001e-06	0.999991	3	8	SMAD3-SMAD4-cJun-cFos complex; NFAT-JUN-FOS DNA-protein complex; ERG-JUN-FOS DNA-protein complex; ETS2-FOS-JUN complex; ESR1-JUN-GRIP1 complex; ESR1-JUN complex; SMAD3-SMAD4-cJUN complex; JUN-FBW7-PRR7 complex	4; 3; 3; 3; 3; 2; 3; 3	1; 1; 1; 1; 1; 1; 1; 1	2692; 2693; 2694; 2695; 2699; 2700; 2708; 6975
947	JUN	-0.555183	-0.407092	0.00353343	0.00854708	-0.956206	-1.59415	9002	3	JUN_2; JUN_4; JUN_3	4	3725	P05412	413	3725	55763	Q9NV70	JUN	EXOC1	2.28556e-07	0.0149073	0.985092	3	8	SMAD3-SMAD4-cJun-cFos complex; NFAT-JUN-FOS DNA-protein complex; ERG-JUN-FOS DNA-protein complex; ETS2-FOS-JUN complex; ESR1-JUN-GRIP1 complex; ESR1-JUN complex; SMAD3-SMAD4-cJUN complex; JUN-FBW7-PRR7 complex	4; 3; 3; 3; 3; 2; 3; 3	1; 1; 1; 1; 1; 1; 1; 1	2692; 2693; 2694; 2695; 2699; 2700; 2708; 6975
948	MLST8	-0.55413	-0.569572	0.000267032	0.00172248	-0.966455	-1.73471	689	4	MLST8_2; MLST8_1; MLST8_3; MLST8_4	4	64223	Q9BVC4	414	64223	3312	P11142	MLST8	HSPA8	4.70651e-14	0.0378737	0.962126	3	3	mTOR complex (MTOR, RICTOR, MLST8); mTORC1 complex; mTORC2 complex	3; 3; 4	1; 2; 1	1895; 2970; 3979
949	MLST8	-0.55413	-0.569572	0.000267032	0.00172248	-0.966455	-1.73471	689	4	MLST8_2; MLST8_1; MLST8_3; MLST8_4	4	64223	Q9BVC4	414	64223	10273	Q9UNE7	MLST8	STUB1	6.02224e-14	0.0117644	0.988236	3	3	mTOR complex (MTOR, RICTOR, MLST8); mTORC1 complex; mTORC2 complex	3; 3; 4	1; 2; 1	1895; 2970; 3979
950	MLST8	-0.55413	-0.569572	0.000267032	0.00172248	-0.966455	-1.73471	689	4	MLST8_2; MLST8_1; MLST8_3; MLST8_4	4	64223	Q9BVC4	414	64223	51693	Q9UL33	MLST8	TRAPPC2L	4.45306e-09	0.00451582	0.995484	3	3	mTOR complex (MTOR, RICTOR, MLST8); mTORC1 complex; mTORC2 complex	3; 3; 4	1; 2; 1	1895; 2970; 3979
951	STT3B	-0.553181	-0.500986	0.00274299	0.00716474	-0.960366	-1.60108	6988	3	STT3B_2; STT3B_4; STT3B_3	4	201595	Q8TCJ2	416	201595	6185	P04844	STT3B	RPN2	3.88745e-35	0.152288	0.847712	1	1	Oligosaccharyltransferase complex (Stt3B variant)	7	4	1200
952	POLR2I	-0.551171	-0.551171	0.00855425	0.0152428	-0.972943	-1.47028	21547	2	POLR2I_3; POLR2I_1	4	5438	P36954	418	5438	5435	P61218	POLR2I	POLR2F	1.04529e-06	0.0181729	0.981826	3	5	RNA polymerase II holoenzyme complex; RNA polymerase II core complex; RNA polymerase II (RNAPII); BRCA1-core RNA polymerase II complex; BRCA1-RNA polymerase II complex	24; 12; 17; 13; 26	4; 3; 3; 3; 4	103; 104; 2685; 2686; 2825
953	POLR2I	-0.551171	-0.551171	0.00855425	0.0152428	-0.972943	-1.47028	21547	2	POLR2I_3; POLR2I_1	4	5438	P36954	418	5438	11060	O00308	POLR2I	WWP2	1.24735e-06	0.00549835	0.9945	3	5	RNA polymerase II holoenzyme complex; RNA polymerase II core complex; RNA polymerase II (RNAPII); BRCA1-core RNA polymerase II complex; BRCA1-RNA polymerase II complex	24; 12; 17; 13; 26	4; 3; 3; 3; 4	103; 104; 2685; 2686; 2825
954	POLR2I	-0.551171	-0.551171	0.00855425	0.0152428	-0.972943	-1.47028	21547	2	POLR2I_3; POLR2I_1	4	5438	P36954	418	5438	58490	Q9NQG5	POLR2I	RPRD1B	0.0303225	0.00101646	0.968661	3	5	RNA polymerase II holoenzyme complex; RNA polymerase II core complex; RNA polymerase II (RNAPII); BRCA1-core RNA polymerase II complex; BRCA1-RNA polymerase II complex	24; 12; 17; 13; 26	4; 3; 3; 3; 4	103; 104; 2685; 2686; 2825
955	RFK	-0.548545	-0.548545	0.00905405	0.015773	-0.972049	-1.46892	22806	2	RFK_1; RFK_2	4	55312	Q969G6	421	55312	3557	P18510	RFK	IL1RN	3.30822e-09	0.134099	0.865901	1
956	POLR2F	-0.547137	-0.547137	0.0220291	0.0281156	-0.953198	-1.44044	55490	2	POLR2F_4; POLR2F_1	4	5435	P61218	422	5435	5438	P36954	POLR2F	POLR2I	1.04529e-06	0.0181729	0.981826	10	5	RNA polymerase II holoenzyme complex; RNA polymerase II core complex; RNA polymerase II (RNAPII); BRCA1-core RNA polymerase II complex; BRCA1-RNA polymerase II complex	24; 12; 17; 13; 26	4; 3; 3; 3; 4	103; 104; 2685; 2686; 2825
957	POLR2F	-0.547137	-0.547137	0.0220291	0.0281156	-0.953198	-1.44044	55490	2	POLR2F_4; POLR2F_1	4	5435	P61218	422	5435	84172	Q9H9Y6	POLR2F	POLR1B	1.79957e-15	0.00178163	0.998218	10	5	RNA polymerase II holoenzyme complex; RNA polymerase II core complex; RNA polymerase II (RNAPII); BRCA1-core RNA polymerase II complex; BRCA1-RNA polymerase II complex	24; 12; 17; 13; 26	4; 3; 3; 3; 4	103; 104; 2685; 2686; 2825
958	POLR2F	-0.547137	-0.547137	0.0220291	0.0281156	-0.953198	-1.44044	55490	2	POLR2F_4; POLR2F_1	4	5435	P61218	422	5435	55703	Q9NW08	POLR2F	POLR3B	1.36528e-12	1.61784e-05	0.999984	10	5	RNA polymerase II holoenzyme complex; RNA polymerase II core complex; RNA polymerase II (RNAPII); BRCA1-core RNA polymerase II complex; BRCA1-RNA polymerase II complex	24; 12; 17; 13; 26	4; 3; 3; 3; 4	103; 104; 2685; 2686; 2825
959	POLR2F	-0.547137	-0.547137	0.0220291	0.0281156	-0.953198	-1.44044	55490	2	POLR2F_4; POLR2F_1	4	5435	P61218	422	5435	58490	Q9NQG5	POLR2F	RPRD1B	4.02968e-16	0.00817365	0.991826	10	5	RNA polymerase II holoenzyme complex; RNA polymerase II core complex; RNA polymerase II (RNAPII); BRCA1-core RNA polymerase II complex; BRCA1-RNA polymerase II complex	24; 12; 17; 13; 26	4; 3; 3; 3; 4	103; 104; 2685; 2686; 2825
960	POLR2F	-0.547137	-0.547137	0.0220291	0.0281156	-0.953198	-1.44044	55490	2	POLR2F_4; POLR2F_1	4	5435	P61218	422	5435	5431	P30876	POLR2F	POLR2B	1.51218e-13	0.114103	0.885897	10	5	RNA polymerase II holoenzyme complex; RNA polymerase II core complex; RNA polymerase II (RNAPII); BRCA1-core RNA polymerase II complex; BRCA1-RNA polymerase II complex	24; 12; 17; 13; 26	4; 3; 3; 3; 4	103; 104; 2685; 2686; 2825
961	POLR2F	-0.547137	-0.547137	0.0220291	0.0281156	-0.953198	-1.44044	55490	2	POLR2F_4; POLR2F_1	4	5435	P61218	422	5435	9533	O15160	POLR2F	POLR1C	5.52504e-25	0.00363576	0.996364	10	5	RNA polymerase II holoenzyme complex; RNA polymerase II core complex; RNA polymerase II (RNAPII); BRCA1-core RNA polymerase II complex; BRCA1-RNA polymerase II complex	24; 12; 17; 13; 26	4; 3; 3; 3; 4	103; 104; 2685; 2686; 2825
962	POLR2F	-0.547137	-0.547137	0.0220291	0.0281156	-0.953198	-1.44044	55490	2	POLR2F_4; POLR2F_1	4	5435	P61218	422	5435	27297	O75575	POLR2F	CRCP	6.09024e-09	1.26638e-05	0.999987	10	5	RNA polymerase II holoenzyme complex; RNA polymerase II core complex; RNA polymerase II (RNAPII); BRCA1-core RNA polymerase II complex; BRCA1-RNA polymerase II complex	24; 12; 17; 13; 26	4; 3; 3; 3; 4	103; 104; 2685; 2686; 2825
963	POLR2F	-0.547137	-0.547137	0.0220291	0.0281156	-0.953198	-1.44044	55490	2	POLR2F_4; POLR2F_1	4	5435	P61218	422	5435	51184	Q9UHW5	POLR2F	GPN3	2.11181e-11	1.34132e-05	0.999987	10	5	RNA polymerase II holoenzyme complex; RNA polymerase II core complex; RNA polymerase II (RNAPII); BRCA1-core RNA polymerase II complex; BRCA1-RNA polymerase II complex	24; 12; 17; 13; 26	4; 3; 3; 3; 4	103; 104; 2685; 2686; 2825
964	POLR2F	-0.547137	-0.547137	0.0220291	0.0281156	-0.953198	-1.44044	55490	2	POLR2F_4; POLR2F_1	4	5435	P61218	422	5435	51728	Q9Y2Y1	POLR2F	POLR3K	1.4532e-08	0.000810286	0.99919	10	5	RNA polymerase II holoenzyme complex; RNA polymerase II core complex; RNA polymerase II (RNAPII); BRCA1-core RNA polymerase II complex; BRCA1-RNA polymerase II complex	24; 12; 17; 13; 26	4; 3; 3; 3; 4	103; 104; 2685; 2686; 2825
965	POLR2F	-0.547137	-0.547137	0.0220291	0.0281156	-0.953198	-1.44044	55490	2	POLR2F_4; POLR2F_1	4	5435	P61218	422	5435	136647	Q8TAP9	POLR2F	MPLKIP	0.0168494	0.187895	0.795256	10	5	RNA polymerase II holoenzyme complex; RNA polymerase II core complex; RNA polymerase II (RNAPII); BRCA1-core RNA polymerase II complex; BRCA1-RNA polymerase II complex	24; 12; 17; 13; 26	4; 3; 3; 3; 4	103; 104; 2685; 2686; 2825
966	HYPK	-0.544072	-0.413504	0.00624698	0.0123219	-0.945134	-1.57569	15916	3	HYPK_4; HYPK_1; HYPK_2	4	25764	Q9NX55	425	25764	80155	Q9BXJ9	HYPK	NAA15	1.54507e-23	1.37014e-13	1	1
967	EPC1	-0.543207	-0.596823	0.0129225	0.0198552	-0.926708	-1.54497	32925	3	EPC1_1; EPC1_3; EPC1_2	4	80314	Q9H2F5	427	80314	55257	Q9NV56	EPC1	MRGBP	2.59772e-12	2.68646e-05	0.999973	1	7	NuA4/Tip60-HAT complex; NuA4/Tip60-HAT complex; NuA4/Tip60-HAT complex B; NuA4/Tip60-HAT complex A; DMAP1-associated complex; NuA4/Tip60 HAT complex; NuA4/Tip60 HAT complex	31; 31; 8; 15; 10; 24; 24	6; 6; 1; 4; 2; 5; 5	528; 529; 787; 798; 799; 2856; 2857
968	EEF1G	-0.542143	-0.542143	0.0135245	0.0204294	-0.96471	-1.45783	34067	2	EEF1G_3; EEF1G_1	4	1937	P26641	428	1937	30849	Q99570	EEF1G	PIK3R4	8.55052e-12	0.153335	0.846665	1
969	STUB1	-0.540997	-0.540997	0.00959078	0.0163232	-0.97107	-1.46744	24158	2	STUB1_4; STUB1_3	4	10273	Q9UNE7	430	10273	3312	P11142	STUB1	HSPA8	1.48218e-14	0.0140727	0.985927	3	2	N-NOS-CHIP-HSP70-1 complex; CHIP-HSC70-TAU-UBCH5B complex	3; 4	1; 2	432; 6037
970	STUB1	-0.540997	-0.540997	0.00959078	0.0163232	-0.97107	-1.46744	24158	2	STUB1_4; STUB1_3	4	10273	Q9UNE7	430	10273	26610	Q96EB1	STUB1	ELP4	7.97258e-16	0.210787	0.789213	3	2	N-NOS-CHIP-HSP70-1 complex; CHIP-HSC70-TAU-UBCH5B complex	3; 4	1; 2	432; 6037
971	STUB1	-0.540997	-0.540997	0.00959078	0.0163232	-0.97107	-1.46744	24158	2	STUB1_4; STUB1_3	4	10273	Q9UNE7	430	10273	64223	Q9BVC4	STUB1	MLST8	6.02224e-14	0.0117644	0.988236	3	2	N-NOS-CHIP-HSP70-1 complex; CHIP-HSC70-TAU-UBCH5B complex	3; 4	1; 2	432; 6037
972	COG7	-0.540819	-0.540819	0.03487	0.03938	-0.938661	-1.41847	87836	2	COG7_1; COG7_3	4	91949	P83436	431	91949	57511	Q9Y2V7	COG7	COG6	1.3291e-22	3.20643e-12	1	5	5	COG complex; Tetrameric COG subcomplex; Binary COG subcomplex; COG5-COG6-COG7 subcomplex; COG1-COG8-COG5-COG6-COG7 subcomplex	8; 4; 2; 3; 5	2; 2; 1; 2; 2	162; 3525; 3530; 3545; 3552
973	COG7	-0.540819	-0.540819	0.03487	0.03938	-0.938661	-1.41847	87836	2	COG7_1; COG7_3	4	91949	P83436	431	91949	282991	Q6QNY1	COG7	BLOC1S2	1.0977e-07	0.0144054	0.985594	5	5	COG complex; Tetrameric COG subcomplex; Binary COG subcomplex; COG5-COG6-COG7 subcomplex; COG1-COG8-COG5-COG6-COG7 subcomplex	8; 4; 2; 3; 5	2; 2; 1; 2; 2	162; 3525; 3530; 3545; 3552
974	COG7	-0.540819	-0.540819	0.03487	0.03938	-0.938661	-1.41847	87836	2	COG7_1; COG7_3	4	91949	P83436	431	91949	22930	Q15042	COG7	RAB3GAP1	8.52096e-05	0.0729882	0.926927	5	5	COG complex; Tetrameric COG subcomplex; Binary COG subcomplex; COG5-COG6-COG7 subcomplex; COG1-COG8-COG5-COG6-COG7 subcomplex	8; 4; 2; 3; 5	2; 2; 1; 2; 2	162; 3525; 3530; 3545; 3552
975	COG7	-0.540819	-0.540819	0.03487	0.03938	-0.938661	-1.41847	87836	2	COG7_1; COG7_3	4	91949	P83436	431	91949	23557	O95295	COG7	SNAPIN	5.30933e-07	0.111486	0.888513	5	5	COG complex; Tetrameric COG subcomplex; Binary COG subcomplex; COG5-COG6-COG7 subcomplex; COG1-COG8-COG5-COG6-COG7 subcomplex	8; 4; 2; 3; 5	2; 2; 1; 2; 2	162; 3525; 3530; 3545; 3552
976	COG7	-0.540819	-0.540819	0.03487	0.03938	-0.938661	-1.41847	87836	2	COG7_1; COG7_3	4	91949	P83436	431	91949	54951	Q9NX08	COG7	COMMD8	4.10366e-10	0.00218421	0.997816	5	5	COG complex; Tetrameric COG subcomplex; Binary COG subcomplex; COG5-COG6-COG7 subcomplex; COG1-COG8-COG5-COG6-COG7 subcomplex	8; 4; 2; 3; 5	2; 2; 1; 2; 2	162; 3525; 3530; 3545; 3552
977	NCKAP1L	-0.539735	-0.575024	0.000998082	0.00378109	-0.949534	-1.70434	2578	4	NCKAP1L_2; NCKAP1L_3; NCKAP1L_1; NCKAP1L_4	4	3071	P55160	433	3071	55845	Q8WUW1	NCKAP1L	BRK1	9.21895e-11	9.00328e-09	1	1
978	WDR36	-0.538124	-0.538124	0.0476617	0.0505567	-0.926283	-1.39976	120058	2	WDR36_4; WDR36_2	4	134430	Q8NI36	434	134430	3312	P11142	WDR36	HSPA8	6.77506e-18	0.142326	0.857674	3
979	WDR36	-0.538124	-0.538124	0.0476617	0.0505567	-0.926283	-1.39976	120058	2	WDR36_4; WDR36_2	4	134430	Q8NI36	434	134430	5822	Q15269	WDR36	PWP2	8.53233e-12	7.49638e-08	1	3
980	WDR36	-0.538124	-0.538124	0.0476617	0.0505567	-0.926283	-1.39976	120058	2	WDR36_4; WDR36_2	4	134430	Q8NI36	434	134430	5936	Q9BWF3	WDR36	RBM4	1.18208e-07	0.0142326	0.985767	3
981	C16orf62	-0.535731	-0.535731	0.0227084	0.0286758	-0.952346	-1.43915	57201	2	C16orf62_4; C16orf62_3	4	57020	Q7Z3J2	436	57020	51397	Q9Y6G5	C16orf62	COMMD10	1.476e-10	7.31979e-07	0.999999	8	6	CCC-Wash (WASH1, FAM21C) complex; CCC complex; COMMD1-CCDC22-CCDC93-C16orf62 complex; CCDC22-CCDC93-C16orf62 complex; COMMD1-CCDC93-C16orf62 complex; CCDC22-CCDC93-C16orf62-FAM21-WASH1 complex	15; 13; 4; 3; 3; 5	9; 9; 3; 3; 2; 3	6639; 6645; 7131; 7132; 7134; 7135
982	C16orf62	-0.535731	-0.535731	0.0227084	0.0286758	-0.952346	-1.43915	57201	2	C16orf62_4; C16orf62_3	4	57020	Q7Z3J2	436	57020	51122	Q86X83	C16orf62	COMMD2	8.86435e-11	2.53647e-07	1	8	6	CCC-Wash (WASH1, FAM21C) complex; CCC complex; COMMD1-CCDC22-CCDC93-C16orf62 complex; CCDC22-CCDC93-C16orf62 complex; COMMD1-CCDC93-C16orf62 complex; CCDC22-CCDC93-C16orf62-FAM21-WASH1 complex	15; 13; 4; 3; 3; 5	9; 9; 3; 3; 2; 3	6639; 6645; 7131; 7132; 7134; 7135
983	C16orf62	-0.535731	-0.535731	0.0227084	0.0286758	-0.952346	-1.43915	57201	2	C16orf62_4; C16orf62_3	4	57020	Q7Z3J2	436	57020	51699	Q9UBQ0	C16orf62	VPS29	6.49947e-08	2.66203e-07	1	8	6	CCC-Wash (WASH1, FAM21C) complex; CCC complex; COMMD1-CCDC22-CCDC93-C16orf62 complex; CCDC22-CCDC93-C16orf62 complex; COMMD1-CCDC93-C16orf62 complex; CCDC22-CCDC93-C16orf62-FAM21-WASH1 complex	15; 13; 4; 3; 3; 5	9; 9; 3; 3; 2; 3	6639; 6645; 7131; 7132; 7134; 7135
984	C16orf62	-0.535731	-0.535731	0.0227084	0.0286758	-0.952346	-1.43915	57201	2	C16orf62_4; C16orf62_3	4	57020	Q7Z3J2	436	57020	54951	Q9NX08	C16orf62	COMMD8	5.26137e-11	7.84719e-07	0.999999	8	6	CCC-Wash (WASH1, FAM21C) complex; CCC complex; COMMD1-CCDC22-CCDC93-C16orf62 complex; CCDC22-CCDC93-C16orf62 complex; COMMD1-CCDC93-C16orf62 complex; CCDC22-CCDC93-C16orf62-FAM21-WASH1 complex	15; 13; 4; 3; 3; 5	9; 9; 3; 3; 2; 3	6639; 6645; 7131; 7132; 7134; 7135
985	C16orf62	-0.535731	-0.535731	0.0227084	0.0286758	-0.952346	-1.43915	57201	2	C16orf62_4; C16orf62_3	4	57020	Q7Z3J2	436	57020	28952	O60826	C16orf62	CCDC22	2.17638e-09	1.14228e-06	0.999999	8	6	CCC-Wash (WASH1, FAM21C) complex; CCC complex; COMMD1-CCDC22-CCDC93-C16orf62 complex; CCDC22-CCDC93-C16orf62 complex; COMMD1-CCDC93-C16orf62 complex; CCDC22-CCDC93-C16orf62-FAM21-WASH1 complex	15; 13; 4; 3; 3; 5	9; 9; 3; 3; 2; 3	6639; 6645; 7131; 7132; 7134; 7135
986	C16orf62	-0.535731	-0.535731	0.0227084	0.0286758	-0.952346	-1.43915	57201	2	C16orf62_4; C16orf62_3	4	57020	Q7Z3J2	436	57020	23412	Q9UBI1	C16orf62	COMMD3	5.38666e-10	1.13233e-06	0.999999	8	6	CCC-Wash (WASH1, FAM21C) complex; CCC complex; COMMD1-CCDC22-CCDC93-C16orf62 complex; CCDC22-CCDC93-C16orf62 complex; COMMD1-CCDC93-C16orf62 complex; CCDC22-CCDC93-C16orf62-FAM21-WASH1 complex	15; 13; 4; 3; 3; 5	9; 9; 3; 3; 2; 3	6639; 6645; 7131; 7132; 7134; 7135
987	C16orf62	-0.535731	-0.535731	0.0227084	0.0286758	-0.952346	-1.43915	57201	2	C16orf62_4; C16orf62_3	4	57020	Q7Z3J2	436	57020	54939	Q9H0A8	C16orf62	COMMD4	1.3985e-10	2.84448e-06	0.999997	8	6	CCC-Wash (WASH1, FAM21C) complex; CCC complex; COMMD1-CCDC22-CCDC93-C16orf62 complex; CCDC22-CCDC93-C16orf62 complex; COMMD1-CCDC93-C16orf62 complex; CCDC22-CCDC93-C16orf62-FAM21-WASH1 complex	15; 13; 4; 3; 3; 5	9; 9; 3; 3; 2; 3	6639; 6645; 7131; 7132; 7134; 7135
988	C16orf62	-0.535731	-0.535731	0.0227084	0.0286758	-0.952346	-1.43915	57201	2	C16orf62_4; C16orf62_3	4	57020	Q7Z3J2	436	57020	28991	Q9GZQ3	C16orf62	COMMD5	5.65284e-11	2.12681e-06	0.999998	8	6	CCC-Wash (WASH1, FAM21C) complex; CCC complex; COMMD1-CCDC22-CCDC93-C16orf62 complex; CCDC22-CCDC93-C16orf62 complex; COMMD1-CCDC93-C16orf62 complex; CCDC22-CCDC93-C16orf62-FAM21-WASH1 complex	15; 13; 4; 3; 3; 5	9; 9; 3; 3; 2; 3	6639; 6645; 7131; 7132; 7134; 7135
989	DPH1	-0.534031	-0.514973	0.000731824	0.00310051	-0.95419	-1.7127	1890	4	DPH1_1; DPH1_3; DPH1_4; DPH1_2	4	1801	Q9BZG8	438	1801	55697	Q08AM6	DPH1	VAC14	1.21583e-05	0.180055	0.819933	2
990	DPH1	-0.534031	-0.514973	0.000731824	0.00310051	-0.95419	-1.7127	1890	4	DPH1_1; DPH1_3; DPH1_4; DPH1_2	4	1801	Q9BZG8	438	1801	3312	P11142	DPH1	HSPA8	0.0391667	2.2049e-07	0.960833	2
991	DDX55	-0.533163	-0.533163	0.0133872	0.0202761	-0.964937	-1.45818	33721	2	DDX55_3; DDX55_4	3	57696	Q8NHQ9	439	57696	66036	Q96QG7	DDX55	MTMR9	2.61296e-05	0.219082	0.780892	5
992	DDX55	-0.533163	-0.533163	0.0133872	0.0202761	-0.964937	-1.45818	33721	2	DDX55_3; DDX55_4	3	57696	Q8NHQ9	439	57696	170506	Q9H2U1	DDX55	DHX36	7.14735e-12	0.042684	0.957316	5
993	DDX55	-0.533163	-0.533163	0.0133872	0.0202761	-0.964937	-1.45818	33721	2	DDX55_3; DDX55_4	3	57696	Q8NHQ9	439	57696	6223	P39019	DDX55	RPS19	2.98326e-24	0.125545	0.874455	5
994	DDX55	-0.533163	-0.533163	0.0133872	0.0202761	-0.964937	-1.45818	33721	2	DDX55_3; DDX55_4	3	57696	Q8NHQ9	439	57696	84294	Q9BRU9	DDX55	UTP23	4.44881e-05	0.0178526	0.982103	5
995	DDX55	-0.533163	-0.533163	0.0133872	0.0202761	-0.964937	-1.45818	33721	2	DDX55_3; DDX55_4	3	57696	Q8NHQ9	439	57696	11103	Q13601	DDX55	KRR1	7.56707e-05	2.66628e-05	0.999898	5
996	POP5	-0.531609	-0.531609	0.0117857	0.0187524	-0.96745	-1.46197	29687	2	POP5_1; POP5_2	4	51367	Q969H6	440	51367	25871	Q6NW34	POP5	C3orf17	8.94994e-13	1.672e-06	0.999998	5	1	Rnase/Mrp complex	10	5	123
997	POP5	-0.531609	-0.531609	0.0117857	0.0187524	-0.96745	-1.46197	29687	2	POP5_1; POP5_2	4	51367	Q969H6	440	51367	10556	P78346	POP5	RPP30	1.64153e-18	9.72045e-06	0.99999	5	1	Rnase/Mrp complex	10	5	123
998	POP5	-0.531609	-0.531609	0.0117857	0.0187524	-0.96745	-1.46197	29687	2	POP5_1; POP5_2	4	51367	Q969H6	440	51367	10557	P78345	POP5	RPP38	1.02425e-12	6.82137e-05	0.999932	5	1	Rnase/Mrp complex	10	5	123
999	POP5	-0.531609	-0.531609	0.0117857	0.0187524	-0.96745	-1.46197	29687	2	POP5_1; POP5_2	4	51367	Q969H6	440	51367	11102	O95059	POP5	RPP14	8.28856e-11	2.59294e-08	1	5	1	Rnase/Mrp complex	10	5	123
1000	POP5	-0.531609	-0.531609	0.0117857	0.0187524	-0.96745	-1.46197	29687	2	POP5_1; POP5_2	4	51367	Q969H6	440	51367	10248	O75817	POP5	POP7	8.23205e-14	4.46826e-09	1	5	1	Rnase/Mrp complex	10	5	123
1001	RPL14	-0.527708	-0.527708	0.0103371	0.0170539	-0.969849	-1.4656	26038	2	RPL14_3; RPL14_1	4	9045	P50914	442	9045	10250	Q8IYB3	RPL14	SRRM1	2.379e-16	0.238191	0.761809	8	4	Ribosome, cytoplasmic; 60S ribosomal subunit, cytoplasmic; Nop56p-associated pre-rRNA complex; TRBP containing complex (DICER, RPL7A, EIF6, MOV10 and subunits of the 60S ribosomal particle)	81; 48; 105; 25	4; 1; 6; 1	306; 308; 3055; 5380
1002	RPL14	-0.527708	-0.527708	0.0103371	0.0170539	-0.969849	-1.4656	26038	2	RPL14_3; RPL14_1	4	9045	P50914	442	9045	9013	Q15572	RPL14	TAF1C	2.83341e-08	0.11004	0.88996	8	4	Ribosome, cytoplasmic; 60S ribosomal subunit, cytoplasmic; Nop56p-associated pre-rRNA complex; TRBP containing complex (DICER, RPL7A, EIF6, MOV10 and subunits of the 60S ribosomal particle)	81; 48; 105; 25	4; 1; 6; 1	306; 308; 3055; 5380
1003	RPL14	-0.527708	-0.527708	0.0103371	0.0170539	-0.969849	-1.4656	26038	2	RPL14_3; RPL14_1	4	9045	P50914	442	9045	6208	P62263	RPL14	RPS14	6.03116e-25	0.148664	0.851336	8	4	Ribosome, cytoplasmic; 60S ribosomal subunit, cytoplasmic; Nop56p-associated pre-rRNA complex; TRBP containing complex (DICER, RPL7A, EIF6, MOV10 and subunits of the 60S ribosomal particle)	81; 48; 105; 25	4; 1; 6; 1	306; 308; 3055; 5380
1004	RPL14	-0.527708	-0.527708	0.0103371	0.0170539	-0.969849	-1.4656	26038	2	RPL14_3; RPL14_1	4	9045	P50914	442	9045	51491	Q9Y3C1	RPL14	NOP16	1.73554e-23	0.0477978	0.952202	8	4	Ribosome, cytoplasmic; 60S ribosomal subunit, cytoplasmic; Nop56p-associated pre-rRNA complex; TRBP containing complex (DICER, RPL7A, EIF6, MOV10 and subunits of the 60S ribosomal particle)	81; 48; 105; 25	4; 1; 6; 1	306; 308; 3055; 5380
1005	RPL14	-0.527708	-0.527708	0.0103371	0.0170539	-0.969849	-1.4656	26038	2	RPL14_3; RPL14_1	4	9045	P50914	442	9045	1662	Q13206	RPL14	DDX10	7.21977e-13	0.00882931	0.991171	8	4	Ribosome, cytoplasmic; 60S ribosomal subunit, cytoplasmic; Nop56p-associated pre-rRNA complex; TRBP containing complex (DICER, RPL7A, EIF6, MOV10 and subunits of the 60S ribosomal particle)	81; 48; 105; 25	4; 1; 6; 1	306; 308; 3055; 5380
1006	RPL14	-0.527708	-0.527708	0.0103371	0.0170539	-0.969849	-1.4656	26038	2	RPL14_3; RPL14_1	4	9045	P50914	442	9045	55922	O15226	RPL14	NKRF	1.33633e-13	0.0266109	0.973389	8	4	Ribosome, cytoplasmic; 60S ribosomal subunit, cytoplasmic; Nop56p-associated pre-rRNA complex; TRBP containing complex (DICER, RPL7A, EIF6, MOV10 and subunits of the 60S ribosomal particle)	81; 48; 105; 25	4; 1; 6; 1	306; 308; 3055; 5380
1007	RPL14	-0.527708	-0.527708	0.0103371	0.0170539	-0.969849	-1.4656	26038	2	RPL14_3; RPL14_1	4	9045	P50914	442	9045	10664	P49711	RPL14	CTCF	1.80561e-10	0.0024899	0.99751	8	4	Ribosome, cytoplasmic; 60S ribosomal subunit, cytoplasmic; Nop56p-associated pre-rRNA complex; TRBP containing complex (DICER, RPL7A, EIF6, MOV10 and subunits of the 60S ribosomal particle)	81; 48; 105; 25	4; 1; 6; 1	306; 308; 3055; 5380
1008	RPL14	-0.527708	-0.527708	0.0103371	0.0170539	-0.969849	-1.4656	26038	2	RPL14_3; RPL14_1	4	9045	P50914	442	9045	51634	Q9Y388	RPL14	RBMX2	7.11073e-13	0.0971644	0.902836	8	4	Ribosome, cytoplasmic; 60S ribosomal subunit, cytoplasmic; Nop56p-associated pre-rRNA complex; TRBP containing complex (DICER, RPL7A, EIF6, MOV10 and subunits of the 60S ribosomal particle)	81; 48; 105; 25	4; 1; 6; 1	306; 308; 3055; 5380
1009	FECH	-0.527095	-0.318035	0.0099166	0.016746	-0.934217	-1.55749	25266	3	FECH_3; FECH_2; FECH_4	4	2235	P22830	443	2235	7936	P18615	FECH	NELFE	3.05791e-12	0.00379703	0.996203	4
1010	FECH	-0.527095	-0.318035	0.0099166	0.016746	-0.934217	-1.55749	25266	3	FECH_3; FECH_2; FECH_4	4	2235	P22830	443	2235	25920	Q8WX92	FECH	NELFB	5.15683e-11	1.36212e-05	0.999986	4
1011	FECH	-0.527095	-0.318035	0.0099166	0.016746	-0.934217	-1.55749	25266	3	FECH_3; FECH_2; FECH_4	4	2235	P22830	443	2235	51497	Q8IXH7	FECH	NELFCD	2.50605e-20	2.46407e-09	1	4
1012	FECH	-0.527095	-0.318035	0.0099166	0.016746	-0.934217	-1.55749	25266	3	FECH_3; FECH_2; FECH_4	4	2235	P22830	443	2235	5518	P30153	FECH	PPP2R1A	5.56282e-26	3.28859e-06	0.999997	4
1013	CYLD	-0.52665	-0.52665	0.012405	0.0193507	-0.966456	-1.46047	31247	2	CYLD_3; CYLD_2	4	1540	Q9NQC7	445	1540	2885	P62993	CYLD	GRB2	1.93106e-09	7.88694e-08	1	1	1	SPATA2-CYLD complex	2	1	6296
1014	SRRM1	-0.523731	-0.523731	0.0192872	0.0258123	-0.956633	-1.44563	48583	2	SRRM1_1; SRRM1_3	4	10250	Q8IYB3	448	10250	9045	P50914	SRRM1	RPL14	2.379e-16	0.238191	0.761809	3	9	Spliceosome; Exon junction complex; Exon junction complex; C complex spliceosome; CDC5L complex; Exon junction complex (mRNA splicing-dependent); SRm160/300 complex; SRm160-SRm300 complex; Splicing-associated factors complex	143; 15; 15; 80; 30; 2; 5; 2; 5	9; 2; 2; 3; 5; 1; 1; 1; 1	351; 777; 785; 1181; 1183; 1195; 1261; 2833; 5449
1015	SRRM1	-0.523731	-0.523731	0.0192872	0.0258123	-0.956633	-1.44563	48583	2	SRRM1_1; SRRM1_3	4	10250	Q8IYB3	448	10250	6426	Q07955	SRRM1	SRSF1	2.36611e-13	0.22456	0.77544	3	9	Spliceosome; Exon junction complex; Exon junction complex; C complex spliceosome; CDC5L complex; Exon junction complex (mRNA splicing-dependent); SRm160/300 complex; SRm160-SRm300 complex; Splicing-associated factors complex	143; 15; 15; 80; 30; 2; 5; 2; 5	9; 2; 2; 3; 5; 1; 1; 1; 1	351; 777; 785; 1181; 1183; 1195; 1261; 2833; 5449
1016	SRRM1	-0.523731	-0.523731	0.0192872	0.0258123	-0.956633	-1.44563	48583	2	SRRM1_1; SRRM1_3	4	10250	Q8IYB3	448	10250	55216	Q6ZUT1	SRRM1	C11orf57	3.00148e-15	0.231041	0.768959	3	9	Spliceosome; Exon junction complex; Exon junction complex; C complex spliceosome; CDC5L complex; Exon junction complex (mRNA splicing-dependent); SRm160/300 complex; SRm160-SRm300 complex; Splicing-associated factors complex	143; 15; 15; 80; 30; 2; 5; 2; 5	9; 2; 2; 3; 5; 1; 1; 1; 1	351; 777; 785; 1181; 1183; 1195; 1261; 2833; 5449
1017	POLR1C	-0.521901	-0.537977	0.00066255	0.00297107	-0.955695	-1.7154	1711	4	POLR1C_4; POLR1C_2; POLR1C_3; POLR1C_1	4	9533	O15160	450	9533	84172	Q9H9Y6	POLR1C	POLR1B	3.05239e-15	0.00270793	0.997292	6
1018	POLR1C	-0.521901	-0.537977	0.00066255	0.00297107	-0.955695	-1.7154	1711	4	POLR1C_4; POLR1C_2; POLR1C_3; POLR1C_1	4	9533	O15160	450	9533	55703	Q9NW08	POLR1C	POLR3B	2.80654e-14	1.88885e-05	0.999981	6
1019	POLR1C	-0.521901	-0.537977	0.00066255	0.00297107	-0.955695	-1.7154	1711	4	POLR1C_4; POLR1C_2; POLR1C_3; POLR1C_1	4	9533	O15160	450	9533	27297	O75575	POLR1C	CRCP	1.00821e-10	8.82795e-07	0.999999	6
1020	POLR1C	-0.521901	-0.537977	0.00066255	0.00297107	-0.955695	-1.7154	1711	4	POLR1C_4; POLR1C_2; POLR1C_3; POLR1C_1	4	9533	O15160	450	9533	51728	Q9Y2Y1	POLR1C	POLR3K	1.13267e-16	1.09809e-05	0.999989	6
1021	POLR1C	-0.521901	-0.537977	0.00066255	0.00297107	-0.955695	-1.7154	1711	4	POLR1C_4; POLR1C_2; POLR1C_3; POLR1C_1	4	9533	O15160	450	9533	5435	P61218	POLR1C	POLR2F	5.52504e-25	0.00363576	0.996364	6
1022	POLR1C	-0.521901	-0.537977	0.00066255	0.00297107	-0.955695	-1.7154	1711	4	POLR1C_4; POLR1C_2; POLR1C_3; POLR1C_1	4	9533	O15160	450	9533	51184	Q9UHW5	POLR1C	GPN3	4.2885e-25	0.00953397	0.990466	6
1023	POLR3K	-0.521489	-0.490476	0.00288663	0.00737602	-0.959585	-1.59978	7354	3	POLR3K_1; POLR3K_4; POLR3K_3	4	51728	Q9Y2Y1	451	51728	55703	Q9NW08	POLR3K	POLR3B	6.27059e-14	2.08527e-06	0.999998	8
1024	POLR3K	-0.521489	-0.490476	0.00288663	0.00737602	-0.959585	-1.59978	7354	3	POLR3K_1; POLR3K_4; POLR3K_3	4	51728	Q9Y2Y1	451	51728	27297	O75575	POLR3K	CRCP	1.60564e-09	1.6772e-06	0.999998	8
1025	POLR3K	-0.521489	-0.490476	0.00288663	0.00737602	-0.959585	-1.59978	7354	3	POLR3K_1; POLR3K_4; POLR3K_3	4	51728	Q9Y2Y1	451	51728	9533	O15160	POLR3K	POLR1C	1.23259e-20	1.88309e-08	1	8
1026	POLR3K	-0.521489	-0.490476	0.00288663	0.00737602	-0.959585	-1.59978	7354	3	POLR3K_1; POLR3K_4; POLR3K_3	4	51728	Q9Y2Y1	451	51728	51184	Q9UHW5	POLR3K	GPN3	4.00683e-14	8.11315e-07	0.999999	8
1027	POLR3K	-0.521489	-0.490476	0.00288663	0.00737602	-0.959585	-1.59978	7354	3	POLR3K_1; POLR3K_4; POLR3K_3	4	51728	Q9Y2Y1	451	51728	201163	Q8NFG4	POLR3K	FLCN	3.27973e-09	5.31173e-05	0.999947	8
1028	POLR3K	-0.521489	-0.490476	0.00288663	0.00737602	-0.959585	-1.59978	7354	3	POLR3K_1; POLR3K_4; POLR3K_3	4	51728	Q9Y2Y1	451	51728	5435	P61218	POLR3K	POLR2F	2.03066e-11	9.88266e-07	0.999999	8
1029	POLR3K	-0.521489	-0.490476	0.00288663	0.00737602	-0.959585	-1.59978	7354	3	POLR3K_1; POLR3K_4; POLR3K_3	4	51728	Q9Y2Y1	451	51728	56919	Q9H6R0	POLR3K	DHX33	1.23502e-11	0.206025	0.793975	8
1030	POLR3K	-0.521489	-0.490476	0.00288663	0.00737602	-0.959585	-1.59978	7354	3	POLR3K_1; POLR3K_4; POLR3K_3	4	51728	Q9Y2Y1	451	51728	8409	Q9UBK9	POLR3K	UXT	0.00110627	0.0790914	0.919802	8
1031	SPATA5L1	-0.5191	-0.5191	0.0145388	0.0215078	-0.963191	-1.45554	36622	2	SPATA5L1_2; SPATA5L1_3	4	79029	Q9BVQ7	452	79029	3312	P11142	SPATA5L1	HSPA8	5.85121e-17	0.107833	0.892167	4
1032	SPATA5L1	-0.5191	-0.5191	0.0145388	0.0215078	-0.963191	-1.45554	36622	2	SPATA5L1_2; SPATA5L1_3	4	79029	Q9BVQ7	452	79029	166378	Q8NB90	SPATA5L1	SPATA5	2.64928e-11	0.0368733	0.963127	4
1033	SPATA5L1	-0.5191	-0.5191	0.0145388	0.0215078	-0.963191	-1.45554	36622	2	SPATA5L1_2; SPATA5L1_3	4	79029	Q9BVQ7	452	79029	54955	Q9NX04	SPATA5L1	C1orf109	0.0329762	1.89249e-07	0.967024	4
1034	SPATA5L1	-0.5191	-0.5191	0.0145388	0.0215078	-0.963191	-1.45554	36622	2	SPATA5L1_2; SPATA5L1_3	4	79029	Q9BVQ7	452	79029	51550	Q9BW66	SPATA5L1	CINP	3.06026e-19	9.34842e-16	1	4
1035	GTF3C5	-0.517018	-0.517018	0.0153217	0.0219406	-0.96207	-1.45384	38594	2	GTF3C5_4; GTF3C5_3	4	9328	Q9Y5Q8	454	9328	9329	Q9UKN8	GTF3C5	GTF3C4	1.94552e-15	0.000100637	0.999899	2	4	transcription factor IIIC multisubunit complex; TFIIIC containing-TOP1-SUB1 complex; 5S-DNA-TFIIIA-TFIIIC2 subcomplex; 5S-DNA-TFIIIA-TFIIIC2-TFIIIB subcomplex	5; 7; 6; 9	3; 3; 3; 3	1105; 1106; 1113; 1114
1036	GTF3C5	-0.517018	-0.517018	0.0153217	0.0219406	-0.96207	-1.45384	38594	2	GTF3C5_4; GTF3C5_3	4	9328	Q9Y5Q8	454	9328	9330	Q9Y5Q9	GTF3C5	GTF3C3	1.54315e-14	0.0540346	0.945965	2	4	transcription factor IIIC multisubunit complex; TFIIIC containing-TOP1-SUB1 complex; 5S-DNA-TFIIIA-TFIIIC2 subcomplex; 5S-DNA-TFIIIA-TFIIIC2-TFIIIB subcomplex	5; 7; 6; 9	3; 3; 3; 3	1105; 1106; 1113; 1114
1037	EXOSC8	-0.514959	-0.514959	0.0154975	0.022104	-0.961814	-1.45346	39037	2	EXOSC8_1; EXOSC8_3	4	11340	Q96B26	457	11340	51013	Q9Y3B2	EXOSC8	EXOSC1	1.5026e-27	4.92264e-05	0.999951	2	2	Exosome; Exosome	23; 23	7; 7	789; 7443
1038	EXOSC8	-0.514959	-0.514959	0.0154975	0.022104	-0.961814	-1.45346	39037	2	EXOSC8_1; EXOSC8_3	4	11340	Q96B26	457	11340	56915	Q9NQT4	EXOSC8	EXOSC5	3.37329e-26	0.00538028	0.99462	2	2	Exosome; Exosome	23; 23	7; 7	789; 7443
1039	YLPM1	-0.514852	-0.514852	0.00982103	0.0166238	-0.970672	-1.46684	24738	2	YLPM1_1; YLPM1_3	4	56252	P49750	458	56252	11060	O00308	YLPM1	WWP2	4.43327e-13	0.00166996	0.99833	2
1040	YLPM1	-0.514852	-0.514852	0.00982103	0.0166238	-0.970672	-1.46684	24738	2	YLPM1_1; YLPM1_3	4	56252	P49750	458	56252	5033	P13674	YLPM1	P4HA1	7.30961e-15	0.000103667	0.999896	2
1041	PRPF39	-0.512711	-0.512711	0.0116853	0.018634	-0.96762	-1.46223	29434	2	PRPF39_1; PRPF39_2	4	55015	Q86UA1	460	55015	54952	Q9NX07	PRPF39	TRNAU1AP	1.2224e-26	0.217942	0.782058	1
1042	ASCC3	-0.510825	-0.510825	0.025442	0.0311208	-0.949081	-1.43422	64087	2	ASCC3_2; ASCC3_1	4	10973	Q8N3C0	462	10973	84191	Q9H5X1	ASCC3	FAM96A	8.44537e-12	0.121834	0.878166	1	1	hASC-1 complex	4	1	1377
1043	MAP4K4	-0.509816	-0.509816	0.0143443	0.0213081	-0.963489	-1.45599	36132	2	MAP4K4_1; MAP4K4_3	4	9448	O95819	464	9448	6801	O43815	MAP4K4	STRN	7.86727e-06	0.031132	0.96886	2
1044	MAP4K4	-0.509816	-0.509816	0.0143443	0.0213081	-0.963489	-1.45599	36132	2	MAP4K4_1; MAP4K4_3	4	9448	O95819	464	9448	57826	Q9Y3L5	MAP4K4	RAP2C	8.6769e-16	3.55799e-06	0.999996	2
1045	CINP	-0.506664	-0.493915	0.00171589	0.00510482	-0.967265	-1.61258	4371	3	CINP_3; CINP_4; CINP_1	4	51550	Q9BW66	469	51550	54955	Q9NX04	CINP	C1orf109	2.95074e-09	2.6755e-09	1	4
1046	CINP	-0.506664	-0.493915	0.00171589	0.00510482	-0.967265	-1.61258	4371	3	CINP_3; CINP_4; CINP_1	4	51550	Q9BW66	469	51550	166378	Q8NB90	CINP	SPATA5	1.51676e-11	0.000704153	0.999296	4
1047	CINP	-0.506664	-0.493915	0.00171589	0.00510482	-0.967265	-1.61258	4371	3	CINP_3; CINP_4; CINP_1	4	51550	Q9BW66	469	51550	79029	Q9BVQ7	CINP	SPATA5L1	1.94315e-23	3.08022e-12	1	4
1048	CINP	-0.506664	-0.493915	0.00171589	0.00510482	-0.967265	-1.61258	4371	3	CINP_3; CINP_4; CINP_1	4	51550	Q9BW66	469	51550	25831	Q9ULT8	CINP	HECTD1	4.11111e-11	0.131968	0.868032	4
1049	SEC62	-0.506632	-0.506632	0.0203614	0.02675	-0.955227	-1.4435	51289	2	SEC62_2; SEC62_4	4	7095	Q99442	470	7095	1967	Q14232	SEC62	EIF2B1	4.03143e-11	6.42632e-05	0.999936	4
1050	SEC62	-0.506632	-0.506632	0.0203614	0.02675	-0.955227	-1.4435	51289	2	SEC62_2; SEC62_4	4	7095	Q99442	470	7095	10527	O95373	SEC62	IPO7	3.61123e-14	0.0159394	0.984061	4
1051	SEC62	-0.506632	-0.506632	0.0203614	0.02675	-0.955227	-1.4435	51289	2	SEC62_2; SEC62_4	4	7095	Q99442	470	7095	114882	Q9BZF1	SEC62	OSBPL8	4.46838e-11	0.0366719	0.963328	4
1052	SEC62	-0.506632	-0.506632	0.0203614	0.02675	-0.955227	-1.4435	51289	2	SEC62_2; SEC62_4	4	7095	Q99442	470	7095	55705	Q96P70	SEC62	IPO9	2.73905e-14	0.172638	0.827362	4
1053	PCMTD1	-0.505451	-0.505451	0.0254913	0.0311208	-0.949024	-1.43413	64211	2	PCMTD1_1; PCMTD1_3	4	115294	Q96MG8	471	115294	6208	P62263	PCMTD1	RPS14	0.00238878	0.0169174	0.980694	1
1054	NUFIP1	-0.503251	-0.503251	0.0146166	0.0215339	-0.963078	-1.45537	36818	2	NUFIP1_2; NUFIP1_4	4	26747	Q9UHK0	473	26747	51552	P61106	NUFIP1	RAB14	9.19484e-09	0.210333	0.789667	1
1055	GTF3C4	-0.496667	-0.496667	0.0171403	0.0235371	-0.959515	-1.44998	43175	2	GTF3C4_4; GTF3C4_1	3	9329	Q9UKN8	480	9329	9330	Q9Y5Q9	GTF3C4	GTF3C3	1.8225e-28	6.00053e-05	0.99994	2	4	transcription factor IIIC multisubunit complex; TFIIIC containing-TOP1-SUB1 complex; 5S-DNA-TFIIIA-TFIIIC2 subcomplex; 5S-DNA-TFIIIA-TFIIIC2-TFIIIB subcomplex	5; 7; 6; 9	3; 3; 3; 3	1105; 1106; 1113; 1114
1056	GTF3C4	-0.496667	-0.496667	0.0171403	0.0235371	-0.959515	-1.44998	43175	2	GTF3C4_4; GTF3C4_1	3	9329	Q9UKN8	480	9329	9328	Q9Y5Q8	GTF3C4	GTF3C5	1.94552e-15	0.000100637	0.999899	2	4	transcription factor IIIC multisubunit complex; TFIIIC containing-TOP1-SUB1 complex; 5S-DNA-TFIIIA-TFIIIC2 subcomplex; 5S-DNA-TFIIIA-TFIIIC2-TFIIIB subcomplex	5; 7; 6; 9	3; 3; 3; 3	1105; 1106; 1113; 1114
1057	PRDM15	-0.492302	-0.492302	0.0160672	0.0225397	-0.961033	-1.45228	40472	2	PRDM15_4; PRDM15_2	4	63977	P57071	484	63977	3609	Q12906	PRDM15	ILF3	2.19482e-05	0.153605	0.846373	5
1058	PRDM15	-0.492302	-0.492302	0.0160672	0.0225397	-0.961033	-1.45228	40472	2	PRDM15_4; PRDM15_2	4	63977	P57071	484	63977	6223	P39019	PRDM15	RPS19	7.08615e-07	0.0534662	0.946533	5
1059	PRDM15	-0.492302	-0.492302	0.0160672	0.0225397	-0.961033	-1.45228	40472	2	PRDM15_4; PRDM15_2	4	63977	P57071	484	63977	6727	P37108	PRDM15	SRP14	0.00443935	0.145371	0.850189	5
1060	PRDM15	-0.492302	-0.492302	0.0160672	0.0225397	-0.961033	-1.45228	40472	2	PRDM15_4; PRDM15_2	4	63977	P57071	484	63977	3921	P08865	PRDM15	RPSA	0.0235485	0.000596048	0.975855	5
1061	PRDM15	-0.492302	-0.492302	0.0160672	0.0225397	-0.961033	-1.45228	40472	2	PRDM15_4; PRDM15_2	4	63977	P57071	484	63977	26354	Q9BVP2	PRDM15	GNL3	5.27907e-06	0.198098	0.801897	5
1062	RC3H1	-0.49123	-0.508294	0.00237814	0.00645068	-0.934642	-1.67761	6144	4	RC3H1_1; RC3H1_4; RC3H1_2; RC3H1_3	4	149041	Q5TC82	486	149041	11060	O00308	RC3H1	WWP2	8.30334e-09	2.01821e-09	1	1	1	NUFIP2-Roquin1 complex	2	1	7111
1063	RBMX2	-0.490516	-0.490516	0.0162153	0.0225878	-0.96082	-1.45196	40845	2	RBMX2_4; RBMX2_2	4	51634	Q9Y388	487	51634	9045	P50914	RBMX2	RPL14	7.11073e-13	0.0971644	0.902836	4
1064	RBMX2	-0.490516	-0.490516	0.0162153	0.0225878	-0.96082	-1.45196	40845	2	RBMX2_4; RBMX2_2	4	51634	Q9Y388	487	51634	9277	O15213	RBMX2	WDR46	0.00574452	0.136388	0.857867	4
1065	RBMX2	-0.490516	-0.490516	0.0162153	0.0225878	-0.96082	-1.45196	40845	2	RBMX2_4; RBMX2_2	4	51634	Q9Y388	487	51634	6426	Q07955	RBMX2	SRSF1	0.0754729	0.000648978	0.923878	4
1066	RBMX2	-0.490516	-0.490516	0.0162153	0.0225878	-0.96082	-1.45196	40845	2	RBMX2_4; RBMX2_2	4	51634	Q9Y388	487	51634	23144	Q8IXZ2	RBMX2	ZC3H3	0.0461938	0.00190229	0.951904	4
1067	SIN3A	-0.485266	-0.485266	0.0120235	0.0189622	-0.967067	-1.4614	30286	2	SIN3A_4; SIN3A_3	4	25942	Q96ST3	492	25942	5928	Q09028	SIN3A	RBBP4	3.7864e-30	5.09292e-05	0.999949	3	36	DNMT3B complex; SIN3 complex; SAP complex (Sin3-associated protein complex); SAP complex (Sin3-associated protein complex); SIN3-HDAC-SAP30-ARID4 complex; Anti-HDAC2 complex; SIN3-SAP25 complex; BRMS1-SIN3-HDAC complex; BRG1-SIN3A complex; BRM-SIN3A complex; PU.1-SIN3A-HDAC complex; SIN3-ING1b complex I; SIN3-ING1b complex II; SIN3-SAP25 complex; NCOR-SIN3-RPD3 complex; NCOR-SIN3-HDAC1 complex; M…	7; 7; 17; 17; 7; 17; 22; 8; 14; 15; 3; 9; 16; 22; 4; 3; 4; 11; 12; 8; 3; 28; 7; 18; 13; 4; 5; 3; 3; 6; 6; 4; 4; 5; 4; 6	2; 2; 4; 4; 2; 2; 4; 2; 6; 6; 1; 2; 5; 4; 1; 1; 1; 4; 5; 2; 1; 6; 2; 4; 2; 1; 2; 1; 1; 2; 1; 1; 1; 1; 1; 1	49; 54; 591; 592; 596; 632; 691; 696; 713; 714; 720; 738; 739; 743; 745; 747; 749; 803; 806; 888; 1232; 1257; 1505; 2721; 2851; 3044; 3048; 3053; 3054; 3149; 3167; 3263; 3961; 5184; 6443; 6444
1068	SIN3A	-0.485266	-0.485266	0.0120235	0.0189622	-0.967067	-1.4614	30286	2	SIN3A_4; SIN3A_3	4	25942	Q96ST3	492	25942	1616	Q9UER7	SIN3A	DAXX	3.03146e-15	0.0396757	0.960324	3	36	DNMT3B complex; SIN3 complex; SAP complex (Sin3-associated protein complex); SAP complex (Sin3-associated protein complex); SIN3-HDAC-SAP30-ARID4 complex; Anti-HDAC2 complex; SIN3-SAP25 complex; BRMS1-SIN3-HDAC complex; BRG1-SIN3A complex; BRM-SIN3A complex; PU.1-SIN3A-HDAC complex; SIN3-ING1b complex I; SIN3-ING1b complex II; SIN3-SAP25 complex; NCOR-SIN3-RPD3 complex; NCOR-SIN3-HDAC1 complex; M…	7; 7; 17; 17; 7; 17; 22; 8; 14; 15; 3; 9; 16; 22; 4; 3; 4; 11; 12; 8; 3; 28; 7; 18; 13; 4; 5; 3; 3; 6; 6; 4; 4; 5; 4; 6	2; 2; 4; 4; 2; 2; 4; 2; 6; 6; 1; 2; 5; 4; 1; 1; 1; 4; 5; 2; 1; 6; 2; 4; 2; 1; 2; 1; 1; 2; 1; 1; 1; 1; 1; 1	49; 54; 591; 592; 596; 632; 691; 696; 713; 714; 720; 738; 739; 743; 745; 747; 749; 803; 806; 888; 1232; 1257; 1505; 2721; 2851; 3044; 3048; 3053; 3054; 3149; 3167; 3263; 3961; 5184; 6443; 6444
1069	SIN3A	-0.485266	-0.485266	0.0120235	0.0189622	-0.967067	-1.4614	30286	2	SIN3A_4; SIN3A_3	4	25942	Q96ST3	492	25942	79726	Q6PJI9	SIN3A	WDR59	1.46233e-11	0.117651	0.882349	3	36	DNMT3B complex; SIN3 complex; SAP complex (Sin3-associated protein complex); SAP complex (Sin3-associated protein complex); SIN3-HDAC-SAP30-ARID4 complex; Anti-HDAC2 complex; SIN3-SAP25 complex; BRMS1-SIN3-HDAC complex; BRG1-SIN3A complex; BRM-SIN3A complex; PU.1-SIN3A-HDAC complex; SIN3-ING1b complex I; SIN3-ING1b complex II; SIN3-SAP25 complex; NCOR-SIN3-RPD3 complex; NCOR-SIN3-HDAC1 complex; M…	7; 7; 17; 17; 7; 17; 22; 8; 14; 15; 3; 9; 16; 22; 4; 3; 4; 11; 12; 8; 3; 28; 7; 18; 13; 4; 5; 3; 3; 6; 6; 4; 4; 5; 4; 6	2; 2; 4; 4; 2; 2; 4; 2; 6; 6; 1; 2; 5; 4; 1; 1; 1; 4; 5; 2; 1; 6; 2; 4; 2; 1; 2; 1; 1; 2; 1; 1; 1; 1; 1; 1	49; 54; 591; 592; 596; 632; 691; 696; 713; 714; 720; 738; 739; 743; 745; 747; 749; 803; 806; 888; 1232; 1257; 1505; 2721; 2851; 3044; 3048; 3053; 3054; 3149; 3167; 3263; 3961; 5184; 6443; 6444
1070	LSM4	-0.484056	-0.484056	0.0107349	0.0175885	-0.969182	-1.46459	27040	2	LSM4_2; LSM4_1	4	25804	Q9Y4Z0	493	25804	219988	Q86TB9	LSM4	PATL1	2.55394e-26	2.35628e-07	1	2	3	Spliceosome; LSm1-7 complex; LSm2-8 complex	143; 7; 7	9; 1; 1	351; 561; 562
1071	LSM4	-0.484056	-0.484056	0.0107349	0.0175885	-0.969182	-1.46459	27040	2	LSM4_2; LSM4_1	4	25804	Q9Y4Z0	493	25804	11193	O75554	LSM4	WBP4	1.71508e-15	0.00234037	0.99766	2	3	Spliceosome; LSm1-7 complex; LSm2-8 complex	143; 7; 7	9; 1; 1	351; 561; 562
1072	SUZ12	-0.481126	-0.396208	0.00868149	0.0152836	-0.937567	-1.56307	22119	3	SUZ12_2; SUZ12_3; SUZ12_4	4	23512	Q15022	497	23512	5928	Q09028	SUZ12	RBBP4	5.83546e-24	3.07409e-08	1	1	4	EED-EZH2 complex; HIC1-PCL3L-PCR2 complex; BRD7-SWI\u2013SNF-SUZ12 complex; BRD7-EZH2-SUZ12 complex	5; 5; 5; 3	2; 1; 2; 2	974; 7304; 7373; 7375
1073	KIDINS220	-0.480877	-0.365996	0.0154187	0.0220355	-0.9212	-1.53578	39285	3	KIDINS220_4; KIDINS220_3; KIDINS220_1	4	57498	Q9ULH0	498	57498	9213	Q9UBH6	KIDINS220	XPR1	1.24673e-15	7.16883e-06	0.999993	2
1074	KIDINS220	-0.480877	-0.365996	0.0154187	0.0220355	-0.9212	-1.53578	39285	3	KIDINS220_4; KIDINS220_3; KIDINS220_1	4	57498	Q9ULH0	498	57498	5045	P09958	KIDINS220	FURIN	2.01958e-15	0.195364	0.804636	2
1075	INO80	-0.480764	-0.50388	0.00446437	0.0097752	-0.952033	-1.58719	11374	3	INO80_2; INO80_1; INO80_3	4	54617	Q9ULG1	499	54617	93973	Q9H981	INO80	ACTR8	7.23261e-11	2.88423e-08	1	6	1	INO80 chromatin remodeling complex	13	5	302
1076	INO80	-0.480764	-0.50388	0.00446437	0.0097752	-0.952033	-1.58719	11374	3	INO80_2; INO80_1; INO80_3	4	54617	Q9ULG1	499	54617	4798	Q6P4R8	INO80	NFRKB	4.79755e-11	1.30253e-06	0.999999	6	1	INO80 chromatin remodeling complex	13	5	302
1077	INO80	-0.480764	-0.50388	0.00446437	0.0097752	-0.952033	-1.58719	11374	3	INO80_2; INO80_1; INO80_3	4	54617	Q9ULG1	499	54617	83444	Q9C086	INO80	INO80B	3.28389e-11	2.61831e-08	1	6	1	INO80 chromatin remodeling complex	13	5	302
1078	INO80	-0.480764	-0.50388	0.00446437	0.0097752	-0.952033	-1.58719	11374	3	INO80_2; INO80_1; INO80_3	4	54617	Q9ULG1	499	54617	7528	P25490	INO80	YY1	3.14277e-12	6.50104e-06	0.999993	6	1	INO80 chromatin remodeling complex	13	5	302
1079	INO80	-0.480764	-0.50388	0.00446437	0.0097752	-0.952033	-1.58719	11374	3	INO80_2; INO80_1; INO80_3	4	54617	Q9ULG1	499	54617	54891	Q53TQ3	INO80	INO80D	4.71893e-09	2.70643e-06	0.999997	6	1	INO80 chromatin remodeling complex	13	5	302
1080	INO80	-0.480764	-0.50388	0.00446437	0.0097752	-0.952033	-1.58719	11374	3	INO80_2; INO80_1; INO80_3	4	54617	Q9ULG1	499	54617	29844	P0C1Z6	INO80	TFPT	3.46498e-19	1.05312e-09	1	6	1	INO80 chromatin remodeling complex	13	5	302
1081	RPP14	-0.480639	-0.465784	0.0034828	0.00848192	-0.956419	-1.5945	8873	3	RPP14_3; RPP14_4; RPP14_1	4	11102	O95059	500	11102	10557	P78345	RPP14	RPP38	3.70748e-14	0.000631565	0.999368	5	1	Rnase/Mrp complex	10	5	123
1082	RPP14	-0.480639	-0.465784	0.0034828	0.00848192	-0.956419	-1.5945	8873	3	RPP14_3; RPP14_4; RPP14_1	4	11102	O95059	500	11102	25871	Q6NW34	RPP14	C3orf17	7.46508e-16	7.57215e-09	1	5	1	Rnase/Mrp complex	10	5	123
1083	RPP14	-0.480639	-0.465784	0.0034828	0.00848192	-0.956419	-1.5945	8873	3	RPP14_3; RPP14_4; RPP14_1	4	11102	O95059	500	11102	51367	Q969H6	RPP14	POP5	8.28856e-11	2.59294e-08	1	5	1	Rnase/Mrp complex	10	5	123
1084	RPP14	-0.480639	-0.465784	0.0034828	0.00848192	-0.956419	-1.5945	8873	3	RPP14_3; RPP14_4; RPP14_1	4	11102	O95059	500	11102	10556	P78346	RPP14	RPP30	7.04366e-22	9.25498e-09	1	5	1	Rnase/Mrp complex	10	5	123
1085	RPP14	-0.480639	-0.465784	0.0034828	0.00848192	-0.956419	-1.5945	8873	3	RPP14_3; RPP14_4; RPP14_1	4	11102	O95059	500	11102	10248	O75817	RPP14	POP7	4.87424e-19	8.56466e-09	1	5	1	Rnase/Mrp complex	10	5	123
1086	TBL1XR1	-0.478961	-0.478961	0.012278	0.0191944	-0.966669	-1.46079	30927	2	TBL1XR1_1; TBL1XR1_2	4	79718	Q9BZK7	502	79718	79726	Q6PJI9	TBL1XR1	WDR59	1.79793e-13	0.032651	0.967349	1	5	NCOR complex; SMRT complex; NCOR-HDAC3 complex; Kaiso-NCOR complex; Emerin complex 32	6; 5; 5; 10; 22	2; 2; 2; 3; 6	15; 58; 741; 2183; 5614
1087	SLC33A1	-0.478282	-0.407003	0.00857513	0.0152428	-0.93788	-1.56359	21848	3	SLC33A1_2; SLC33A1_1; SLC33A1_4	4	9197	O00400	503	9197	26580	Q96G97	SLC33A1	BSCL2	3.44247e-08	0.191816	0.808184	1
1088	TSEN2	-0.47758	-0.47758	0.0390328	0.0431955	-0.934502	-1.41219	98322	2	TSEN2_3; TSEN2_2	4	80746	Q8NCE0	504	80746	283989	Q7Z6J9	TSEN2	TSEN54	1.20831e-15	0.000109404	0.999891	2	2	tRNA splicing endonuclease; RNA endonuclease (SEN2deltaEx8, SEN54, CLP1)	5; 3	3; 2	5283; 5284
1089	TSEN2	-0.47758	-0.47758	0.0390328	0.0431955	-0.934502	-1.41219	98322	2	TSEN2_3; TSEN2_2	4	80746	Q8NCE0	504	80746	116461	Q8WW01	TSEN2	TSEN15	2.69884e-09	3.59786e-06	0.999996	2	2	tRNA splicing endonuclease; RNA endonuclease (SEN2deltaEx8, SEN54, CLP1)	5; 3	3; 2	5283; 5284
1090	NELFE	-0.477484	-0.477484	0.0694165	0.0709019	-0.907744	-1.37175	174858	2	NELFE_1; NELFE_2	4	7936	P18615	505	7936	7469	Q9H3P2	NELFE	NELFA	2.18849e-20	2.83087e-13	1	4	1	NELF complex (Negative elongation factor complex)	4	4	2598
1091	NELFE	-0.477484	-0.477484	0.0694165	0.0709019	-0.907744	-1.37175	174858	2	NELFE_1; NELFE_2	4	7936	P18615	505	7936	51497	Q8IXH7	NELFE	NELFCD	1.2176e-23	8.70881e-16	1	4	1	NELF complex (Negative elongation factor complex)	4	4	2598
1092	NELFE	-0.477484	-0.477484	0.0694165	0.0709019	-0.907744	-1.37175	174858	2	NELFE_1; NELFE_2	4	7936	P18615	505	7936	25920	Q8WX92	NELFE	NELFB	7.34745e-12	9.78188e-09	1	4	1	NELF complex (Negative elongation factor complex)	4	4	2598
1093	NELFE	-0.477484	-0.477484	0.0694165	0.0709019	-0.907744	-1.37175	174858	2	NELFE_1; NELFE_2	4	7936	P18615	505	7936	2235	P22830	NELFE	FECH	3.05791e-12	0.00379703	0.996203	4	1	NELF complex (Negative elongation factor complex)	4	4	2598
1094	MSMO1	-0.47748	-0.518637	0.00868777	0.0152836	-0.937553	-1.56305	22135	3	MSMO1_4; MSMO1_3; MSMO1_2	4	6307	Q15800	506	6307	26580	Q96G97	MSMO1	BSCL2	0.000218062	0.146343	0.853439	1
1095	SNAP29	-0.473321	-0.473321	0.0212677	0.0275864	-0.954106	-1.44181	53572	2	SNAP29_2; SNAP29_1	4	9342	O95721	510	9342	7187	Q13114	SNAP29	TRAF3	1.71175e-11	2.62962e-06	0.999997	8	1	SNARE complex (STX1A, SNAP29)	2	1	873
1096	SNAP29	-0.473321	-0.473321	0.0212677	0.0275864	-0.954106	-1.44181	53572	2	SNAP29_2; SNAP29_1	4	9342	O95721	510	9342	112869	Q96ES7	SNAP29	CCDC101	3.16198e-23	0.00177935	0.998221	8	1	SNARE complex (STX1A, SNAP29)	2	1	873
1097	SNAP29	-0.473321	-0.473321	0.0212677	0.0275864	-0.954106	-1.44181	53572	2	SNAP29_2; SNAP29_1	4	9342	O95721	510	9342	11311	Q9NRW7	SNAP29	VPS45	2.08195e-08	0.00504952	0.99495	8	1	SNARE complex (STX1A, SNAP29)	2	1	873
1098	SNAP29	-0.473321	-0.473321	0.0212677	0.0275864	-0.954106	-1.44181	53572	2	SNAP29_2; SNAP29_1	4	9342	O95721	510	9342	57511	Q9Y2V7	SNAP29	COG6	1.09618e-06	0.19446	0.805539	8	1	SNARE complex (STX1A, SNAP29)	2	1	873
1099	SNAP29	-0.473321	-0.473321	0.0212677	0.0275864	-0.954106	-1.44181	53572	2	SNAP29_2; SNAP29_1	4	9342	O95721	510	9342	23256	Q8WVM8	SNAP29	SCFD1	3.50262e-12	0.00499176	0.995008	8	1	SNARE complex (STX1A, SNAP29)	2	1	873
1100	SNAP29	-0.473321	-0.473321	0.0212677	0.0275864	-0.954106	-1.44181	53572	2	SNAP29_2; SNAP29_1	4	9342	O95721	510	9342	8773	O00161	SNAP29	SNAP23	1.4952e-10	0.00211436	0.997886	8	1	SNARE complex (STX1A, SNAP29)	2	1	873
1101	SNAP29	-0.473321	-0.473321	0.0212677	0.0275864	-0.954106	-1.44181	53572	2	SNAP29_2; SNAP29_1	4	9342	O95721	510	9342	25843	Q9Y3A3	SNAP29	MOB4	1.30127e-05	0.000358368	0.999629	8	1	SNARE complex (STX1A, SNAP29)	2	1	873
1102	SNAP29	-0.473321	-0.473321	0.0212677	0.0275864	-0.954106	-1.44181	53572	2	SNAP29_2; SNAP29_1	4	9342	O95721	510	9342	29844	P0C1Z6	SNAP29	TFPT	1.18081e-12	0.00619831	0.993802	8	1	SNARE complex (STX1A, SNAP29)	2	1	873
1103	NKTR	-0.473155	-0.444541	0.00591888	0.0119715	-0.946312	-1.57765	15080	3	NKTR_3; NKTR_2; NKTR_4	4	4820	P30414	512	4820	6208	P62263	NKTR	RPS14	2.25989e-07	0.0868776	0.913122	2
1104	NKTR	-0.473155	-0.444541	0.00591888	0.0119715	-0.946312	-1.57765	15080	3	NKTR_3; NKTR_2; NKTR_4	4	4820	P30414	512	4820	55216	Q6ZUT1	NKTR	C11orf57	1.41947e-11	1.25171e-05	0.999987	2
1105	ATP6V1D	-0.468471	-0.468471	0.0209219	0.0272862	-0.954532	-1.44245	52701	2	ATP6V1D_2; ATP6V1D_1	4	51382	Q9Y5K8	513	51382	57511	Q9Y2V7	ATP6V1D	COG6	1.08642e-12	0.00190649	0.998094	7
1106	ATP6V1D	-0.468471	-0.468471	0.0209219	0.0272862	-0.954532	-1.44245	52701	2	ATP6V1D_2; ATP6V1D_1	4	51382	Q9Y5K8	513	51382	529	P36543	ATP6V1D	ATP6V1E1	3.2989e-12	3.54587e-05	0.999965	7
1107	ATP6V1D	-0.468471	-0.468471	0.0209219	0.0272862	-0.954532	-1.44245	52701	2	ATP6V1D_2; ATP6V1D_1	4	51382	Q9Y5K8	513	51382	523	P38606	ATP6V1D	ATP6V1A	2.4177e-12	0.00239486	0.997605	7
1108	ATP6V1D	-0.468471	-0.468471	0.0209219	0.0272862	-0.954532	-1.44245	52701	2	ATP6V1D_2; ATP6V1D_1	4	51382	Q9Y5K8	513	51382	528	P21283	ATP6V1D	ATP6V1C1	1.49953e-13	6.62587e-06	0.999993	7
1109	ATP6V1D	-0.468471	-0.468471	0.0209219	0.0272862	-0.954532	-1.44245	52701	2	ATP6V1D_2; ATP6V1D_1	4	51382	Q9Y5K8	513	51382	9296	Q16864	ATP6V1D	ATP6V1F	6.73233e-16	0.000217979	0.999782	7
1110	ATP6V1D	-0.468471	-0.468471	0.0209219	0.0272862	-0.954532	-1.44245	52701	2	ATP6V1D_2; ATP6V1D_1	4	51382	Q9Y5K8	513	51382	9550	O75348	ATP6V1D	ATP6V1G1	2.61078e-27	2.08334e-12	1	7
1111	ATP6V1D	-0.468471	-0.468471	0.0209219	0.0272862	-0.954532	-1.44245	52701	2	ATP6V1D_2; ATP6V1D_1	4	51382	Q9Y5K8	513	51382	10159	O75787	ATP6V1D	ATP6AP2	1.7974e-10	0.015292	0.984708	7
1112	ARID1A	-0.467415	-0.394062	0.0077164	0.0142395	-0.940449	-1.56788	19660	3	ARID1A_1; ARID1A_4; ARID1A_3	4	8289	O14497	514	8289	11060	O00308	ARID1A	WWP2	7.28148e-15	0.0438652	0.956135	3	15	NUMAC complex (nucleosomal methylation activator complex); BAF complex; SWI-SNF chromatin remodeling-related-BRCA1 complex; p300-CBP-p270-SWI/SNF complex; p300-CBP-p270 complex; BRG1-SIN3A complex; BRM-SIN3A complex; SIN3-ING1b complex II; LARC complex (LCR-associated remodeling complex); BRG1-SIN3A-HDAC containing SWI/SNF remodeling complex I; BRM-SIN3A-HDAC complex; WINAC complex; BAF complex; …	10; 22; 10; 7; 3; 14; 15; 16; 19; 11; 12; 14; 22; 10; 11	3; 6; 4; 5; 3; 6; 6; 5; 5; 4; 5; 3; 6; 5; 3	86; 189; 238; 570; 571; 713; 714; 739; 778; 803; 806; 1230; 1237; 1252; 7372
1113	ARID1A	-0.467415	-0.394062	0.0077164	0.0142395	-0.940449	-1.56788	19660	3	ARID1A_1; ARID1A_4; ARID1A_3	4	8289	O14497	514	8289	6598	Q12824	ARID1A	SMARCB1	2.41555e-14	0.0138295	0.98617	3	15	NUMAC complex (nucleosomal methylation activator complex); BAF complex; SWI-SNF chromatin remodeling-related-BRCA1 complex; p300-CBP-p270-SWI/SNF complex; p300-CBP-p270 complex; BRG1-SIN3A complex; BRM-SIN3A complex; SIN3-ING1b complex II; LARC complex (LCR-associated remodeling complex); BRG1-SIN3A-HDAC containing SWI/SNF remodeling complex I; BRM-SIN3A-HDAC complex; WINAC complex; BAF complex; …	10; 22; 10; 7; 3; 14; 15; 16; 19; 11; 12; 14; 22; 10; 11	3; 6; 4; 5; 3; 6; 6; 5; 5; 4; 5; 3; 6; 5; 3	86; 189; 238; 570; 571; 713; 714; 739; 778; 803; 806; 1230; 1237; 1252; 7372
1114	ARID1A	-0.467415	-0.394062	0.0077164	0.0142395	-0.940449	-1.56788	19660	3	ARID1A_1; ARID1A_4; ARID1A_3	4	8289	O14497	514	8289	6601	Q8TAQ2	ARID1A	SMARCC2	1.9862e-15	0.00501487	0.994985	3	15	NUMAC complex (nucleosomal methylation activator complex); BAF complex; SWI-SNF chromatin remodeling-related-BRCA1 complex; p300-CBP-p270-SWI/SNF complex; p300-CBP-p270 complex; BRG1-SIN3A complex; BRM-SIN3A complex; SIN3-ING1b complex II; LARC complex (LCR-associated remodeling complex); BRG1-SIN3A-HDAC containing SWI/SNF remodeling complex I; BRM-SIN3A-HDAC complex; WINAC complex; BAF complex; …	10; 22; 10; 7; 3; 14; 15; 16; 19; 11; 12; 14; 22; 10; 11	3; 6; 4; 5; 3; 6; 6; 5; 5; 4; 5; 3; 6; 5; 3	86; 189; 238; 570; 571; 713; 714; 739; 778; 803; 806; 1230; 1237; 1252; 7372
1115	PDS5B	-0.464306	-0.464306	0.0153137	0.0219406	-0.962084	-1.45387	38574	2	PDS5B_1; PDS5B_4	4	23047	Q9NTI5	517	23047	23244	Q29RF7	PDS5B	PDS5A	5.91144e-06	0.000167712	0.999826	1	1	Sororin-cohesin complex	6	2	5432
1116	FAM96A	-0.463462	-0.463462	0.0204082	0.0267509	-0.955171	-1.44342	51407	2	FAM96A_2; FAM96A_4	4	84191	Q9H5X1	519	84191	4650	Q13459	FAM96A	MYO9B	2.75454e-11	0.230096	0.769904	13
1117	FAM96A	-0.463462	-0.463462	0.0204082	0.0267509	-0.955171	-1.44342	51407	2	FAM96A_2; FAM96A_4	4	84191	Q9H5X1	519	84191	10985	Q92616	FAM96A	GCN1L1	7.62331e-12	0.0520528	0.947947	13
1118	FAM96A	-0.463462	-0.463462	0.0204082	0.0267509	-0.955171	-1.44342	51407	2	FAM96A_2; FAM96A_4	4	84191	Q9H5X1	519	84191	10973	Q8N3C0	FAM96A	ASCC3	8.44537e-12	0.121834	0.878166	13
1119	FAM96A	-0.463462	-0.463462	0.0204082	0.0267509	-0.955171	-1.44342	51407	2	FAM96A_2; FAM96A_4	4	84191	Q9H5X1	519	84191	64411	Q8WWN8	FAM96A	ARAP3	7.39572e-09	0.000896479	0.999104	13
1120	FAM96A	-0.463462	-0.463462	0.0204082	0.0267509	-0.955171	-1.44342	51407	2	FAM96A_2; FAM96A_4	4	84191	Q9H5X1	519	84191	22894	Q9Y2L1	FAM96A	DIS3	3.25464e-13	0.000314332	0.999686	13
1121	FAM96A	-0.463462	-0.463462	0.0204082	0.0267509	-0.955171	-1.44342	51407	2	FAM96A_2; FAM96A_4	4	84191	Q9H5X1	519	84191	57617	Q9P253	FAM96A	VPS18	7.40717e-10	0.00716776	0.992832	13
1122	FAM96A	-0.463462	-0.463462	0.0204082	0.0267509	-0.955171	-1.44342	51407	2	FAM96A_2; FAM96A_4	4	84191	Q9H5X1	519	84191	114882	Q9BZF1	FAM96A	OSBPL8	2.49628e-13	0.0546138	0.945386	13
1123	FAM96A	-0.463462	-0.463462	0.0204082	0.0267509	-0.955171	-1.44342	51407	2	FAM96A_2; FAM96A_4	4	84191	Q9H5X1	519	84191	9894	Q9Y4R8	FAM96A	TELO2	5.64797e-11	0.0720546	0.927945	13
1124	FAM96A	-0.463462	-0.463462	0.0204082	0.0267509	-0.955171	-1.44342	51407	2	FAM96A_2; FAM96A_4	4	84191	Q9H5X1	519	84191	64601	Q9H269	FAM96A	VPS16	4.91271e-09	0.00978901	0.990211	13
1125	FAM96A	-0.463462	-0.463462	0.0204082	0.0267509	-0.955171	-1.44342	51407	2	FAM96A_2; FAM96A_4	4	84191	Q9H5X1	519	84191	27072	P49754	FAM96A	VPS41	0.000100578	0.0187187	0.981181	13
1126	FAM96A	-0.463462	-0.463462	0.0204082	0.0267509	-0.955171	-1.44342	51407	2	FAM96A_2; FAM96A_4	4	84191	Q9H5X1	519	84191	23294	Q92625	FAM96A	ANKS1A	7.78262e-07	0.00218295	0.997816	13
1127	FAM96A	-0.463462	-0.463462	0.0204082	0.0267509	-0.955171	-1.44342	51407	2	FAM96A_2; FAM96A_4	4	84191	Q9H5X1	519	84191	23759	Q13356	FAM96A	PPIL2	0.00171451	0.00976874	0.988517	13
1128	FAM96A	-0.463462	-0.463462	0.0204082	0.0267509	-0.955171	-1.44342	51407	2	FAM96A_2; FAM96A_4	4	84191	Q9H5X1	519	84191	65082	Q96AX1	FAM96A	VPS33A	0.000258101	0.00268695	0.997055	13
1129	AATF	-0.461743	-0.461743	0.02935	0.0346775	-0.944524	-1.42733	73931	2	AATF_4; AATF_2	4	26574	Q9NY61	522	26574	6223	P39019	AATF	RPS19	2.47287e-13	0.0823375	0.917662	6
1130	AATF	-0.461743	-0.461743	0.02935	0.0346775	-0.944524	-1.42733	73931	2	AATF_4; AATF_2	4	26574	Q9NY61	522	26574	6727	P37108	AATF	SRP14	3.49816e-08	0.13543	0.86457	6
1131	AATF	-0.461743	-0.461743	0.02935	0.0346775	-0.944524	-1.42733	73931	2	AATF_4; AATF_2	4	26574	Q9NY61	522	26574	6426	Q07955	AATF	SRSF1	2.5335e-11	0.0475063	0.952494	6
1132	AATF	-0.461743	-0.461743	0.02935	0.0346775	-0.944524	-1.42733	73931	2	AATF_4; AATF_2	4	26574	Q9NY61	522	26574	3921	P08865	AATF	RPSA	4.45731e-06	0.136611	0.863384	6
1133	AATF	-0.461743	-0.461743	0.02935	0.0346775	-0.944524	-1.42733	73931	2	AATF_4; AATF_2	4	26574	Q9NY61	522	26574	11103	Q13601	AATF	KRR1	2.14469e-12	0.00528334	0.994717	6
1134	AATF	-0.461743	-0.461743	0.02935	0.0346775	-0.944524	-1.42733	73931	2	AATF_4; AATF_2	4	26574	Q9NY61	522	26574	23144	Q8IXZ2	AATF	ZC3H3	6.27809e-05	0.161527	0.838411	6
1135	BIRC2	-0.460461	-0.427179	0.0160529	0.0225397	-0.919908	-1.53363	40901	3	BIRC2_2; BIRC2_1; BIRC2_4	4	329	Q13490	523	329	7186	Q12933	BIRC2	TRAF2	3.73407e-22	5.17573e-15	1	4	2	TRAF2-cIAP1/BIRC2 complex; Tumor necrosis factor receptor 1 signaling complex	2; 4	2; 2	5529; 5531
1136	BIRC2	-0.460461	-0.427179	0.0160529	0.0225397	-0.919908	-1.53363	40901	3	BIRC2_2; BIRC2_1; BIRC2_4	4	329	Q13490	523	329	7128	P21580	BIRC2	TNFAIP3	3.21277e-09	0.196636	0.803364	4	2	TRAF2-cIAP1/BIRC2 complex; Tumor necrosis factor receptor 1 signaling complex	2; 4	2; 2	5529; 5531
1137	BIRC2	-0.460461	-0.427179	0.0160529	0.0225397	-0.919908	-1.53363	40901	3	BIRC2_2; BIRC2_1; BIRC2_4	4	329	Q13490	523	329	29956	Q96G23	BIRC2	CERS2	2.37813e-06	0.0270796	0.972918	4	2	TRAF2-cIAP1/BIRC2 complex; Tumor necrosis factor receptor 1 signaling complex	2; 4	2; 2	5529; 5531
1138	BIRC2	-0.460461	-0.427179	0.0160529	0.0225397	-0.919908	-1.53363	40901	3	BIRC2_2; BIRC2_1; BIRC2_4	4	329	Q13490	523	329	27342	Q9UJ41	BIRC2	RABGEF1	3.73975e-15	0.00151957	0.99848	4	2	TRAF2-cIAP1/BIRC2 complex; Tumor necrosis factor receptor 1 signaling complex	2; 4	2; 2	5529; 5531
1139	ALG6	-0.459683	-0.45269	0.00749779	0.0139439	-0.941131	-1.56901	19103	3	ALG6_4; ALG6_2; ALG6_1	4	29929	Q9Y672	525	29929	79053	Q9BVK2	ALG6	ALG8	2.40129e-12	0.00492285	0.995077	1
1140	ARGLU1	-0.457902	-0.457902	0.0301185	0.0352367	-0.943687	-1.42606	75867	2	ARGLU1_2; ARGLU1_1	4	55082	Q9NWB6	527	55082	6426	Q07955	ARGLU1	SRSF1	5.8915e-15	0.238834	0.761166	1
1141	COPS4	-0.457813	-0.457813	0.0204618	0.0267509	-0.9551	-1.44331	51542	2	COPS4_2; COPS4_1	4	51138	Q9BT78	528	51138	8533	Q9UNS2	COPS4	COPS3	1.58301e-12	7.21474e-06	0.999993	1	4	DDB2 complex; CSA complex; CSA-POLIIa complex; COP9 signalosome complex	12; 12; 13; 8	2; 2; 2; 2	726; 727; 728; 2174
1142	EXOC1	-0.456594	-0.456594	0.0306695	0.0357063	-0.943062	-1.42512	77255	2	EXOC1_4; EXOC1_1	4	55763	Q9NV70	529	55763	55770	Q96KP1	EXOC1	EXOC2	1.76441e-13	3.86643e-06	0.999996	9	1	Exocyst complex	8	3	6167
1143	EXOC1	-0.456594	-0.456594	0.0306695	0.0357063	-0.943062	-1.42512	77255	2	EXOC1_4; EXOC1_1	4	55763	Q9NV70	529	55763	23265	Q9UPT5	EXOC1	EXOC7	6.54536e-11	0.00316096	0.996839	9	1	Exocyst complex	8	3	6167
1144	EXOC1	-0.456594	-0.456594	0.0306695	0.0357063	-0.943062	-1.42512	77255	2	EXOC1_4; EXOC1_1	4	55763	Q9NV70	529	55763	3725	P05412	EXOC1	JUN	2.28556e-07	0.0149073	0.985092	9	1	Exocyst complex	8	3	6167
1145	EXOC1	-0.456594	-0.456594	0.0306695	0.0357063	-0.943062	-1.42512	77255	2	EXOC1_4; EXOC1_1	4	55763	Q9NV70	529	55763	282991	Q6QNY1	EXOC1	BLOC1S2	1.67972e-05	0.0376323	0.962351	9	1	Exocyst complex	8	3	6167
1146	EXOC1	-0.456594	-0.456594	0.0306695	0.0357063	-0.943062	-1.42512	77255	2	EXOC1_4; EXOC1_1	4	55763	Q9NV70	529	55763	27342	Q9UJ41	EXOC1	RABGEF1	1.28221e-12	0.00373347	0.996267	9	1	Exocyst complex	8	3	6167
1147	EXOC1	-0.456594	-0.456594	0.0306695	0.0357063	-0.943062	-1.42512	77255	2	EXOC1_4; EXOC1_1	4	55763	Q9NV70	529	55763	10318	Q15025	EXOC1	TNIP1	9.23042e-06	0.0382526	0.961738	9	1	Exocyst complex	8	3	6167
1148	EXOC1	-0.456594	-0.456594	0.0306695	0.0357063	-0.943062	-1.42512	77255	2	EXOC1_4; EXOC1_1	4	55763	Q9NV70	529	55763	23557	O95295	EXOC1	SNAPIN	2.38184e-11	0.01012	0.98988	9	1	Exocyst complex	8	3	6167
1149	EXOC1	-0.456594	-0.456594	0.0306695	0.0357063	-0.943062	-1.42512	77255	2	EXOC1_4; EXOC1_1	4	55763	Q9NV70	529	55763	79036	Q9BQD3	EXOC1	KXD1	4.26648e-13	4.24083e-06	0.999996	9	1	Exocyst complex	8	3	6167
1150	EXOC1	-0.456594	-0.456594	0.0306695	0.0357063	-0.943062	-1.42512	77255	2	EXOC1_4; EXOC1_1	4	55763	Q9NV70	529	55763	57511	Q9Y2V7	EXOC1	COG6	7.74229e-10	0.0653177	0.934682	9	1	Exocyst complex	8	3	6167
1151	UXT	-0.453838	-0.453838	0.0213888	0.0276683	-0.953964	-1.4416	53877	2	UXT_2; UXT_1	4	8409	Q9UBK9	531	8409	116143	Q96MX6	UXT	WDR92	2.13108e-12	0.003428	0.996572	5
1152	UXT	-0.453838	-0.453838	0.0213888	0.0276683	-0.953964	-1.4416	53877	2	UXT_2; UXT_1	4	8409	Q9UBK9	531	8409	7227	Q9UHF7	UXT	TRPS1	0.000284393	0.00153513	0.99818	5
1153	UXT	-0.453838	-0.453838	0.0213888	0.0276683	-0.953964	-1.4416	53877	2	UXT_2; UXT_1	4	8409	Q9UBK9	531	8409	55703	Q9NW08	UXT	POLR3B	9.34014e-14	0.0328552	0.967145	5
1154	UXT	-0.453838	-0.453838	0.0213888	0.0276683	-0.953964	-1.4416	53877	2	UXT_2; UXT_1	4	8409	Q9UBK9	531	8409	51184	Q9UHW5	UXT	GPN3	3.23808e-05	0.031417	0.968551	5
1155	UXT	-0.453838	-0.453838	0.0213888	0.0276683	-0.953964	-1.4416	53877	2	UXT_2; UXT_1	4	8409	Q9UBK9	531	8409	51728	Q9Y2Y1	UXT	POLR3K	0.00110627	0.0790914	0.919802	5
1156	RAB3GAP1	-0.4537	-0.4537	0.0245012	0.0301423	-0.950202	-1.43591	61717	2	RAB3GAP1_1; RAB3GAP1_2	4	22930	Q15042	532	22930	91949	P83436	RAB3GAP1	COG7	8.52096e-05	0.0729882	0.926927	2
1157	RAB3GAP1	-0.4537	-0.4537	0.0245012	0.0301423	-0.950202	-1.43591	61717	2	RAB3GAP1_1; RAB3GAP1_2	4	22930	Q15042	532	22930	6727	P37108	RAB3GAP1	SRP14	7.1967e-05	0.155733	0.844195	2
1158	IL1RN	-0.450601	-0.450601	0.017066	0.0234986	-0.9596	-1.45011	42988	2	IL1RN_3; IL1RN_4	4	3557	P18510	536	3557	55312	Q969G6	IL1RN	RFK	3.30822e-09	0.134099	0.865901	3
1159	IL1RN	-0.450601	-0.450601	0.017066	0.0234986	-0.9596	-1.45011	42988	2	IL1RN_3; IL1RN_4	4	3557	P18510	536	3557	10159	O75787	IL1RN	ATP6AP2	0.0106473	0.0198873	0.969465	3
1160	IL1RN	-0.450601	-0.450601	0.017066	0.0234986	-0.9596	-1.45011	42988	2	IL1RN_3; IL1RN_4	4	3557	P18510	536	3557	6794	Q15831	IL1RN	STK11	3.62247e-06	0.03151	0.968486	3
1161	STOML2	-0.449751	-0.444567	0.00358327	0.00863844	-0.925969	-1.66204	9258	4	STOML2_4; STOML2_2; STOML2_1; STOML2_3	4	30968	Q9UJZ1	537	30968	5573	P10644	STOML2	PRKAR1A	3.70895e-13	0.00568342	0.994317	1
1162	SMARCC2	-0.448927	-0.426444	0.00056309	0.00267002	-0.957966	-1.71947	1454	4	SMARCC2_3; SMARCC2_2; SMARCC2_4; SMARCC2_1	4	6601	Q8TAQ2	539	6601	8289	O14497	SMARCC2	ARID1A	1.9862e-15	0.00501487	0.994985	7	25	NUMAC complex (nucleosomal methylation activator complex); PBAF complex (Polybromo- and BAF containing complex); BAF complex; SWI-SNF chromatin remodeling-related-BRCA1 complex; PBAF complex (Polybromo- and BAF containing complex); p300-CBP-p270-SWI/SNF complex; BRG1-SIN3A complex; BRM-SIN3A complex; SIN3-ING1b complex II; LARC complex (LCR-associated remodeling complex); BRG1-SIN3A-HDAC containi…	10; 19; 22; 10; 19; 7; 14; 15; 16; 19; 11; 12; 14; 22; 10; 10; 28; 10; 10; 4; 38; 38; 8; 22; 11	3; 8; 6; 4; 8; 5; 6; 6; 5; 5; 4; 5; 3; 6; 4; 5; 6; 4; 3; 2; 6; 6; 3; 6; 3	86; 149; 189; 238; 556; 570; 713; 714; 739; 778; 803; 806; 1230; 1237; 1239; 1252; 1257; 1413; 2829; 2852; 3064; 3065; 3067; 5614; 7372
1163	SMARCC2	-0.448927	-0.426444	0.00056309	0.00267002	-0.957966	-1.71947	1454	4	SMARCC2_3; SMARCC2_2; SMARCC2_4; SMARCC2_1	4	6601	Q8TAQ2	539	6601	6603	Q92925	SMARCC2	SMARCD2	7.66726e-15	1.97505e-05	0.99998	7	25	NUMAC complex (nucleosomal methylation activator complex); PBAF complex (Polybromo- and BAF containing complex); BAF complex; SWI-SNF chromatin remodeling-related-BRCA1 complex; PBAF complex (Polybromo- and BAF containing complex); p300-CBP-p270-SWI/SNF complex; BRG1-SIN3A complex; BRM-SIN3A complex; SIN3-ING1b complex II; LARC complex (LCR-associated remodeling complex); BRG1-SIN3A-HDAC containi…	10; 19; 22; 10; 19; 7; 14; 15; 16; 19; 11; 12; 14; 22; 10; 10; 28; 10; 10; 4; 38; 38; 8; 22; 11	3; 8; 6; 4; 8; 5; 6; 6; 5; 5; 4; 5; 3; 6; 4; 5; 6; 4; 3; 2; 6; 6; 3; 6; 3	86; 149; 189; 238; 556; 570; 713; 714; 739; 778; 803; 806; 1230; 1237; 1239; 1252; 1257; 1413; 2829; 2852; 3064; 3065; 3067; 5614; 7372
1164	SMARCC2	-0.448927	-0.426444	0.00056309	0.00267002	-0.957966	-1.71947	1454	4	SMARCC2_3; SMARCC2_2; SMARCC2_4; SMARCC2_1	4	6601	Q8TAQ2	539	6601	196528	Q68CP9	SMARCC2	ARID2	8.977e-13	9.88755e-06	0.99999	7	25	NUMAC complex (nucleosomal methylation activator complex); PBAF complex (Polybromo- and BAF containing complex); BAF complex; SWI-SNF chromatin remodeling-related-BRCA1 complex; PBAF complex (Polybromo- and BAF containing complex); p300-CBP-p270-SWI/SNF complex; BRG1-SIN3A complex; BRM-SIN3A complex; SIN3-ING1b complex II; LARC complex (LCR-associated remodeling complex); BRG1-SIN3A-HDAC containi…	10; 19; 22; 10; 19; 7; 14; 15; 16; 19; 11; 12; 14; 22; 10; 10; 28; 10; 10; 4; 38; 38; 8; 22; 11	3; 8; 6; 4; 8; 5; 6; 6; 5; 5; 4; 5; 3; 6; 4; 5; 6; 4; 3; 2; 6; 6; 3; 6; 3	86; 149; 189; 238; 556; 570; 713; 714; 739; 778; 803; 806; 1230; 1237; 1239; 1252; 1257; 1413; 2829; 2852; 3064; 3065; 3067; 5614; 7372
1165	SMARCC2	-0.448927	-0.426444	0.00056309	0.00267002	-0.957966	-1.71947	1454	4	SMARCC2_3; SMARCC2_2; SMARCC2_4; SMARCC2_1	4	6601	Q8TAQ2	539	6601	29117	Q9NPI1	SMARCC2	BRD7	1.30445e-14	1.47283e-08	1	7	25	NUMAC complex (nucleosomal methylation activator complex); PBAF complex (Polybromo- and BAF containing complex); BAF complex; SWI-SNF chromatin remodeling-related-BRCA1 complex; PBAF complex (Polybromo- and BAF containing complex); p300-CBP-p270-SWI/SNF complex; BRG1-SIN3A complex; BRM-SIN3A complex; SIN3-ING1b complex II; LARC complex (LCR-associated remodeling complex); BRG1-SIN3A-HDAC containi…	10; 19; 22; 10; 19; 7; 14; 15; 16; 19; 11; 12; 14; 22; 10; 10; 28; 10; 10; 4; 38; 38; 8; 22; 11	3; 8; 6; 4; 8; 5; 6; 6; 5; 5; 4; 5; 3; 6; 4; 5; 6; 4; 3; 2; 6; 6; 3; 6; 3	86; 149; 189; 238; 556; 570; 713; 714; 739; 778; 803; 806; 1230; 1237; 1239; 1252; 1257; 1413; 2829; 2852; 3064; 3065; 3067; 5614; 7372
1166	SMARCC2	-0.448927	-0.426444	0.00056309	0.00267002	-0.957966	-1.71947	1454	4	SMARCC2_3; SMARCC2_2; SMARCC2_4; SMARCC2_1	4	6601	Q8TAQ2	539	6601	55193	Q86U86	SMARCC2	PBRM1	1.94024e-15	1.01262e-05	0.99999	7	25	NUMAC complex (nucleosomal methylation activator complex); PBAF complex (Polybromo- and BAF containing complex); BAF complex; SWI-SNF chromatin remodeling-related-BRCA1 complex; PBAF complex (Polybromo- and BAF containing complex); p300-CBP-p270-SWI/SNF complex; BRG1-SIN3A complex; BRM-SIN3A complex; SIN3-ING1b complex II; LARC complex (LCR-associated remodeling complex); BRG1-SIN3A-HDAC containi…	10; 19; 22; 10; 19; 7; 14; 15; 16; 19; 11; 12; 14; 22; 10; 10; 28; 10; 10; 4; 38; 38; 8; 22; 11	3; 8; 6; 4; 8; 5; 6; 6; 5; 5; 4; 5; 3; 6; 4; 5; 6; 4; 3; 2; 6; 6; 3; 6; 3	86; 149; 189; 238; 556; 570; 713; 714; 739; 778; 803; 806; 1230; 1237; 1239; 1252; 1257; 1413; 2829; 2852; 3064; 3065; 3067; 5614; 7372
1167	SMARCC2	-0.448927	-0.426444	0.00056309	0.00267002	-0.957966	-1.71947	1454	4	SMARCC2_3; SMARCC2_2; SMARCC2_4; SMARCC2_1	4	6601	Q8TAQ2	539	6601	6598	Q12824	SMARCC2	SMARCB1	7.1167e-14	7.08912e-05	0.999929	7	25	NUMAC complex (nucleosomal methylation activator complex); PBAF complex (Polybromo- and BAF containing complex); BAF complex; SWI-SNF chromatin remodeling-related-BRCA1 complex; PBAF complex (Polybromo- and BAF containing complex); p300-CBP-p270-SWI/SNF complex; BRG1-SIN3A complex; BRM-SIN3A complex; SIN3-ING1b complex II; LARC complex (LCR-associated remodeling complex); BRG1-SIN3A-HDAC containi…	10; 19; 22; 10; 19; 7; 14; 15; 16; 19; 11; 12; 14; 22; 10; 10; 28; 10; 10; 4; 38; 38; 8; 22; 11	3; 8; 6; 4; 8; 5; 6; 6; 5; 5; 4; 5; 3; 6; 4; 5; 6; 4; 3; 2; 6; 6; 3; 6; 3	86; 149; 189; 238; 556; 570; 713; 714; 739; 778; 803; 806; 1230; 1237; 1239; 1252; 1257; 1413; 2829; 2852; 3064; 3065; 3067; 5614; 7372
1168	SMARCC2	-0.448927	-0.426444	0.00056309	0.00267002	-0.957966	-1.71947	1454	4	SMARCC2_3; SMARCC2_2; SMARCC2_4; SMARCC2_1	4	6601	Q8TAQ2	539	6601	11060	O00308	SMARCC2	WWP2	4.87395e-17	0.0683657	0.931634	7	25	NUMAC complex (nucleosomal methylation activator complex); PBAF complex (Polybromo- and BAF containing complex); BAF complex; SWI-SNF chromatin remodeling-related-BRCA1 complex; PBAF complex (Polybromo- and BAF containing complex); p300-CBP-p270-SWI/SNF complex; BRG1-SIN3A complex; BRM-SIN3A complex; SIN3-ING1b complex II; LARC complex (LCR-associated remodeling complex); BRG1-SIN3A-HDAC containi…	10; 19; 22; 10; 19; 7; 14; 15; 16; 19; 11; 12; 14; 22; 10; 10; 28; 10; 10; 4; 38; 38; 8; 22; 11	3; 8; 6; 4; 8; 5; 6; 6; 5; 5; 4; 5; 3; 6; 4; 5; 6; 4; 3; 2; 6; 6; 3; 6; 3	86; 149; 189; 238; 556; 570; 713; 714; 739; 778; 803; 806; 1230; 1237; 1239; 1252; 1257; 1413; 2829; 2852; 3064; 3065; 3067; 5614; 7372
1169	CRCP	-0.448022	-0.43669	0.00463902	0.0100349	-0.951295	-1.58596	11819	3	CRCP_1; CRCP_2; CRCP_4	4	27297	O75575	540	27297	6603	Q92925	CRCP	SMARCD2	4.93454e-14	0.233012	0.766988	4
1170	CRCP	-0.448022	-0.43669	0.00463902	0.0100349	-0.951295	-1.58596	11819	3	CRCP_1; CRCP_2; CRCP_4	4	27297	O75575	540	27297	51728	Q9Y2Y1	CRCP	POLR3K	1.60564e-09	1.6772e-06	0.999998	4
1171	CRCP	-0.448022	-0.43669	0.00463902	0.0100349	-0.951295	-1.58596	11819	3	CRCP_1; CRCP_2; CRCP_4	4	27297	O75575	540	27297	5435	P61218	CRCP	POLR2F	6.09024e-09	1.26638e-05	0.999987	4
1172	CRCP	-0.448022	-0.43669	0.00463902	0.0100349	-0.951295	-1.58596	11819	3	CRCP_1; CRCP_2; CRCP_4	4	27297	O75575	540	27297	9533	O15160	CRCP	POLR1C	1.00821e-10	8.82795e-07	0.999999	4
1173	MTMR9	-0.443861	-0.443861	0.0203003	0.0267187	-0.955313	-1.44363	51135	2	MTMR9_4; MTMR9_3	4	66036	Q96QG7	542	66036	23144	Q8IXZ2	MTMR9	ZC3H3	0.000379942	0.00205222	0.997568	2
1174	MTMR9	-0.443861	-0.443861	0.0203003	0.0267187	-0.955313	-1.44363	51135	2	MTMR9_4; MTMR9_3	4	66036	Q96QG7	542	66036	57696	Q8NHQ9	MTMR9	DDX55	2.61296e-05	0.219082	0.780892	2
1175	MPLKIP	-0.441735	-0.476651	0.0115034	0.0185088	-0.930101	-1.55062	29309	3	MPLKIP_4; MPLKIP_3; MPLKIP_1	4	136647	Q8TAP9	544	136647	5435	P61218	MPLKIP	POLR2F	0.0168494	0.187895	0.795256	2
1176	MPLKIP	-0.441735	-0.476651	0.0115034	0.0185088	-0.930101	-1.55062	29309	3	MPLKIP_4; MPLKIP_3; MPLKIP_1	4	136647	Q8TAP9	544	136647	27158	Q9UHB4	MPLKIP	NDOR1	0.0301481	3.91454e-06	0.969848	2
1177	TRPS1	-0.441421	-0.441421	0.0410305	0.0448516	-0.932557	-1.40925	103354	2	TRPS1_2; TRPS1_4	4	7227	Q9UHF7	545	7227	5928	Q09028	TRPS1	RBBP4	8.29042e-26	0.000213052	0.999787	2
1178	TRPS1	-0.441421	-0.441421	0.0410305	0.0448516	-0.932557	-1.40925	103354	2	TRPS1_2; TRPS1_4	4	7227	Q9UHF7	545	7227	8409	Q9UBK9	TRPS1	UXT	0.000284393	0.00153513	0.99818	2
1179	INPP5K	-0.440901	-0.433733	0.00486313	0.010394	-0.950372	-1.58442	12390	3	INPP5K_3; INPP5K_2; INPP5K_4	4	51763	Q9BT40	546	51763	5033	P13674	INPP5K	P4HA1	5.08243e-28	0.16315	0.83685	1	1	HES1 promoter-Notch enhancer complex	13	2	2639
1180	CD2BP2	-0.440479	-0.440479	0.0309296	0.0359506	-0.942792	-1.42471	77910	2	CD2BP2_2; CD2BP2_1	3	10421	O95400	548	10421	122830	Q147X3	CD2BP2	NAA30	1.77115e-16	0.000883953	0.999116	1	1	Spliceosome	143	9	351
1181	RPP38	-0.439754	-0.439754	0.0198767	0.026355	-0.955866	-1.44447	50068	2	RPP38_1; RPP38_4	4	10557	P78345	549	10557	11102	O95059	RPP38	RPP14	3.70748e-14	0.000631565	0.999368	5	1	Rnase/Mrp complex	10	5	123
1182	RPP38	-0.439754	-0.439754	0.0198767	0.026355	-0.955866	-1.44447	50068	2	RPP38_1; RPP38_4	4	10557	P78345	549	10557	10248	O75817	RPP38	POP7	3.47145e-13	0.000118548	0.999881	5	1	Rnase/Mrp complex	10	5	123
1183	RPP38	-0.439754	-0.439754	0.0198767	0.026355	-0.955866	-1.44447	50068	2	RPP38_1; RPP38_4	4	10557	P78345	549	10557	51367	Q969H6	RPP38	POP5	1.02425e-12	6.82137e-05	0.999932	5	1	Rnase/Mrp complex	10	5	123
1184	RPP38	-0.439754	-0.439754	0.0198767	0.026355	-0.955866	-1.44447	50068	2	RPP38_1; RPP38_4	4	10557	P78345	549	10557	10556	P78346	RPP38	RPP30	8.68588e-13	2.26893e-05	0.999977	5	1	Rnase/Mrp complex	10	5	123
1185	RPP38	-0.439754	-0.439754	0.0198767	0.026355	-0.955866	-1.44447	50068	2	RPP38_1; RPP38_4	4	10557	P78345	549	10557	25871	Q6NW34	RPP38	C3orf17	1.69138e-13	0.00529558	0.994704	5	1	Rnase/Mrp complex	10	5	123
1186	MYO9B	-0.436655	-0.436655	0.0255139	0.0311208	-0.948996	-1.43409	64268	2	MYO9B_2; MYO9B_4	4	4650	Q13459	550	4650	84191	Q9H5X1	MYO9B	FAM96A	2.75454e-11	0.230096	0.769904	1
1187	EXOC7	-0.436177	-0.436177	0.0214468	0.0276683	-0.953893	-1.44149	54023	2	EXOC7_1; EXOC7_4	4	23265	Q9UPT5	551	23265	79036	Q9BQD3	EXOC7	KXD1	3.86467e-13	0.00122169	0.998778	3	2	Exocyst complex; Exocyst EXOC5-EXOC6-EXOC7 subcomplex	8; 3	3; 1	6167; 6169
1188	EXOC7	-0.436177	-0.436177	0.0214468	0.0276683	-0.953893	-1.44149	54023	2	EXOC7_1; EXOC7_4	4	23265	Q9UPT5	551	23265	57511	Q9Y2V7	EXOC7	COG6	2.7095e-12	0.000281079	0.999719	3	2	Exocyst complex; Exocyst EXOC5-EXOC6-EXOC7 subcomplex	8; 3	3; 1	6167; 6169
1189	EXOC7	-0.436177	-0.436177	0.0214468	0.0276683	-0.953893	-1.44149	54023	2	EXOC7_1; EXOC7_4	4	23265	Q9UPT5	551	23265	55763	Q9NV70	EXOC7	EXOC1	6.54536e-11	0.00316096	0.996839	3	2	Exocyst complex; Exocyst EXOC5-EXOC6-EXOC7 subcomplex	8; 3	3; 1	6167; 6169
1190	EGR1	-0.435462	-0.448977	0.00400479	0.00918661	-0.954006	-1.59048	10203	3	EGR1_2; EGR1_3; EGR1_1	4	1958	P18146	553	1958	90007	Q504T8	EGR1	MIDN	4.80122e-08	7.65391e-08	1	2	1	EGR-EP300 complex	2	2	5375
1191	EGR1	-0.435462	-0.448977	0.00400479	0.00918661	-0.954006	-1.59048	10203	3	EGR1_2; EGR1_3; EGR1_1	4	1958	P18146	553	1958	4664	Q13506	EGR1	NAB1	5.10529e-05	0.000925404	0.999024	2	1	EGR-EP300 complex	2	2	5375
1192	CCDC53	-0.435301	-0.435301	0.0147647	0.021663	-0.962865	-1.45505	37191	2	CCDC53_3; CCDC53_2	4	51019	Q9Y3C0	555	51019	9897	Q12768	CCDC53	KIAA0196	9.74794e-10	5.2242e-08	1	6	2	WASH complex; WASH-CAPZalpa/beta complex	5; 7	2; 2	6481; 6484
1193	CCDC53	-0.435301	-0.435301	0.0147647	0.021663	-0.962865	-1.45505	37191	2	CCDC53_3; CCDC53_2	4	51019	Q9Y3C0	555	51019	282991	Q6QNY1	CCDC53	BLOC1S2	3.92959e-10	0.000845093	0.999155	6	2	WASH complex; WASH-CAPZalpa/beta complex	5; 7	2; 2	6481; 6484
1194	CCDC53	-0.435301	-0.435301	0.0147647	0.021663	-0.962865	-1.45505	37191	2	CCDC53_3; CCDC53_2	4	51019	Q9Y3C0	555	51019	10163	Q9Y6W5	CCDC53	WASF2	4.09634e-09	0.011217	0.988783	6	2	WASH complex; WASH-CAPZalpa/beta complex	5; 7	2; 2	6481; 6484
1195	CCDC53	-0.435301	-0.435301	0.0147647	0.021663	-0.962865	-1.45505	37191	2	CCDC53_3; CCDC53_2	4	51019	Q9Y3C0	555	51019	2647	P78537	CCDC53	BLOC1S1	3.8345e-05	0.0393724	0.960589	6	2	WASH complex; WASH-CAPZalpa/beta complex	5; 7	2; 2	6481; 6484
1196	CCDC53	-0.435301	-0.435301	0.0147647	0.021663	-0.962865	-1.45505	37191	2	CCDC53_3; CCDC53_2	4	51019	Q9Y3C0	555	51019	55845	Q8WUW1	CCDC53	BRK1	3.18156e-15	2.73892e-08	1	6	2	WASH complex; WASH-CAPZalpa/beta complex	5; 7	2; 2	6481; 6484
1197	CCDC53	-0.435301	-0.435301	0.0147647	0.021663	-0.962865	-1.45505	37191	2	CCDC53_3; CCDC53_2	4	51019	Q9Y3C0	555	51019	10914	P51003	CCDC53	PAPOLA	0.179448	0.00161578	0.818937	6	2	WASH complex; WASH-CAPZalpa/beta complex	5; 7	2; 2	6481; 6484
1198	MED16	-0.434477	-0.434477	0.0215063	0.0276952	-0.953822	-1.44138	54173	2	MED16_3; MED16_2	4	10025	Q9Y2X0	557	10025	54797	Q9BUE0	MED16	MED18	5.38107e-13	1.74594e-06	0.999998	1	13	TRAP complex; Mediator complex; PC2 complex; SMCC complex; TFTC-type histone acetyl transferase complex; TRAP complex; SMCC complex; DRIP complex; ARC92-Mediator complex; CRSP-Mediator 2 complex; Mediator complex; ESR1-TRAP/Mediator coactivator-complex; ESR2-TRAP/Mediator coactivator complex	24; 59; 12; 39; 11; 24; 39; 14; 13; 10; 59; 18; 18	2; 6; 1; 2; 1; 2; 2; 2; 2; 2; 6; 2; 2	66; 230; 300; 301; 441; 535; 547; 548; 909; 910; 5450; 7581; 7582
1199	RPS19	-0.434	-0.434	0.0159076	0.0224652	-0.961246	-1.4526	40070	2	RPS19_3; RPS19_1	3	6223	P39019	559	6223	6741	P05455	RPS19	SSB	1.71811e-15	0.215814	0.784186	20	2	Ribosome, cytoplasmic; 40S ribosomal subunit, cytoplasmic	81; 31	4; 3	306; 338
1200	RPS19	-0.434	-0.434	0.0159076	0.0224652	-0.961246	-1.4526	40070	2	RPS19_3; RPS19_1	3	6223	P39019	559	6223	57696	Q8NHQ9	RPS19	DDX55	2.98326e-24	0.125545	0.874455	20	2	Ribosome, cytoplasmic; 40S ribosomal subunit, cytoplasmic	81; 31	4; 3	306; 338
1201	RPS19	-0.434	-0.434	0.0159076	0.0224652	-0.961246	-1.4526	40070	2	RPS19_3; RPS19_1	3	6223	P39019	559	6223	1662	Q13206	RPS19	DDX10	1.10637e-11	0.0442956	0.955704	20	2	Ribosome, cytoplasmic; 40S ribosomal subunit, cytoplasmic	81; 31	4; 3	306; 338
1202	RPS19	-0.434	-0.434	0.0159076	0.0224652	-0.961246	-1.4526	40070	2	RPS19_3; RPS19_1	3	6223	P39019	559	6223	51491	Q9Y3C1	RPS19	NOP16	3.62265e-31	0.088822	0.911178	20	2	Ribosome, cytoplasmic; 40S ribosomal subunit, cytoplasmic	81; 31	4; 3	306; 338
1203	RPS19	-0.434	-0.434	0.0159076	0.0224652	-0.961246	-1.4526	40070	2	RPS19_3; RPS19_1	3	6223	P39019	559	6223	65095	Q8N9T8	RPS19	KRI1	6.00157e-11	0.02711	0.97289	20	2	Ribosome, cytoplasmic; 40S ribosomal subunit, cytoplasmic	81; 31	4; 3	306; 338
1204	RPS19	-0.434	-0.434	0.0159076	0.0224652	-0.961246	-1.4526	40070	2	RPS19_3; RPS19_1	3	6223	P39019	559	6223	84294	Q9BRU9	RPS19	UTP23	5.86662e-23	0.0840122	0.915988	20	2	Ribosome, cytoplasmic; 40S ribosomal subunit, cytoplasmic	81; 31	4; 3	306; 338
1205	RPS19	-0.434	-0.434	0.0159076	0.0224652	-0.961246	-1.4526	40070	2	RPS19_3; RPS19_1	3	6223	P39019	559	6223	10664	P49711	RPS19	CTCF	1.32069e-10	0.00382406	0.996176	20	2	Ribosome, cytoplasmic; 40S ribosomal subunit, cytoplasmic	81; 31	4; 3	306; 338
1206	RPS19	-0.434	-0.434	0.0159076	0.0224652	-0.961246	-1.4526	40070	2	RPS19_3; RPS19_1	3	6223	P39019	559	6223	8467	O60264	RPS19	SMARCA5	3.09435e-16	0.17867	0.82133	20	2	Ribosome, cytoplasmic; 40S ribosomal subunit, cytoplasmic	81; 31	4; 3	306; 338
1207	RPS19	-0.434	-0.434	0.0159076	0.0224652	-0.961246	-1.4526	40070	2	RPS19_3; RPS19_1	3	6223	P39019	559	6223	11103	Q13601	RPS19	KRR1	7.2991e-32	0.0849374	0.915063	20	2	Ribosome, cytoplasmic; 40S ribosomal subunit, cytoplasmic	81; 31	4; 3	306; 338
1208	RPS19	-0.434	-0.434	0.0159076	0.0224652	-0.961246	-1.4526	40070	2	RPS19_3; RPS19_1	3	6223	P39019	559	6223	114034	Q96GM8	RPS19	TOE1	5.11342e-12	0.000709724	0.99929	20	2	Ribosome, cytoplasmic; 40S ribosomal subunit, cytoplasmic	81; 31	4; 3	306; 338
1209	RPS19	-0.434	-0.434	0.0159076	0.0224652	-0.961246	-1.4526	40070	2	RPS19_3; RPS19_1	3	6223	P39019	559	6223	63977	P57071	RPS19	PRDM15	7.08615e-07	0.0534662	0.946533	20	2	Ribosome, cytoplasmic; 40S ribosomal subunit, cytoplasmic	81; 31	4; 3	306; 338
1210	RPS19	-0.434	-0.434	0.0159076	0.0224652	-0.961246	-1.4526	40070	2	RPS19_3; RPS19_1	3	6223	P39019	559	6223	26574	Q9NY61	RPS19	AATF	2.47287e-13	0.0823375	0.917662	20	2	Ribosome, cytoplasmic; 40S ribosomal subunit, cytoplasmic	81; 31	4; 3	306; 338
1211	RPS19	-0.434	-0.434	0.0159076	0.0224652	-0.961246	-1.4526	40070	2	RPS19_3; RPS19_1	3	6223	P39019	559	6223	79050	Q9BVI4	RPS19	NOC4L	6.3645e-12	8.81645e-05	0.999912	20	2	Ribosome, cytoplasmic; 40S ribosomal subunit, cytoplasmic	81; 31	4; 3	306; 338
1212	RPS19	-0.434	-0.434	0.0159076	0.0224652	-0.961246	-1.4526	40070	2	RPS19_3; RPS19_1	3	6223	P39019	559	6223	55922	O15226	RPS19	NKRF	3.25251e-14	0.0116587	0.988341	20	2	Ribosome, cytoplasmic; 40S ribosomal subunit, cytoplasmic	81; 31	4; 3	306; 338
1213	RPS19	-0.434	-0.434	0.0159076	0.0224652	-0.961246	-1.4526	40070	2	RPS19_3; RPS19_1	3	6223	P39019	559	6223	3921	P08865	RPS19	RPSA	1.10494e-27	0.000598561	0.999401	20	2	Ribosome, cytoplasmic; 40S ribosomal subunit, cytoplasmic	81; 31	4; 3	306; 338
1214	RPS19	-0.434	-0.434	0.0159076	0.0224652	-0.961246	-1.4526	40070	2	RPS19_3; RPS19_1	3	6223	P39019	559	6223	170506	Q9H2U1	RPS19	DHX36	0.000159138	0.121584	0.878256	20	2	Ribosome, cytoplasmic; 40S ribosomal subunit, cytoplasmic	81; 31	4; 3	306; 338
1215	RPS19	-0.434	-0.434	0.0159076	0.0224652	-0.961246	-1.4526	40070	2	RPS19_3; RPS19_1	3	6223	P39019	559	6223	1616	Q9UER7	RPS19	DAXX	1.68874e-26	0.0341065	0.965894	20	2	Ribosome, cytoplasmic; 40S ribosomal subunit, cytoplasmic	81; 31	4; 3	306; 338
1216	RPS19	-0.434	-0.434	0.0159076	0.0224652	-0.961246	-1.4526	40070	2	RPS19_3; RPS19_1	3	6223	P39019	559	6223	6208	P62263	RPS19	RPS14	8.1443e-34	0.0360531	0.963947	20	2	Ribosome, cytoplasmic; 40S ribosomal subunit, cytoplasmic	81; 31	4; 3	306; 338
1217	RPS19	-0.434	-0.434	0.0159076	0.0224652	-0.961246	-1.4526	40070	2	RPS19_3; RPS19_1	3	6223	P39019	559	6223	6426	Q07955	RPS19	SRSF1	6.68718e-21	0.194547	0.805453	20	2	Ribosome, cytoplasmic; 40S ribosomal subunit, cytoplasmic	81; 31	4; 3	306; 338
1218	RPS19	-0.434	-0.434	0.0159076	0.0224652	-0.961246	-1.4526	40070	2	RPS19_3; RPS19_1	3	6223	P39019	559	6223	55720	Q2NL82	RPS19	TSR1	3.54415e-32	0.0128264	0.987174	20	2	Ribosome, cytoplasmic; 40S ribosomal subunit, cytoplasmic	81; 31	4; 3	306; 338
1219	MOCS3	-0.433312	-0.433312	0.0187822	0.0253737	-0.9573	-1.44664	47311	2	MOCS3_4; MOCS3_3	4	27304	O95396	561	27304	3312	P11142	MOCS3	HSPA8	1.69155e-18	0.166647	0.833353	1
1220	EXOC2	-0.428844	-0.383369	0.00507938	0.0107599	-0.949478	-1.58293	12941	3	EXOC2_4; EXOC2_2; EXOC2_1	4	55770	Q96KP1	564	55770	55763	Q9NV70	EXOC2	EXOC1	1.76441e-13	3.86643e-06	0.999996	1	1	Exocyst complex	8	3	6167
1221	ZC3H3	-0.428164	-0.407563	0.0049012	0.0104132	-0.95023	-1.58418	12487	3	ZC3H3_2; ZC3H3_4; ZC3H3_3	4	23144	Q8IXZ2	566	23144	26574	Q9NY61	ZC3H3	AATF	6.27809e-05	0.161527	0.838411	12
1222	ZC3H3	-0.428164	-0.407563	0.0049012	0.0104132	-0.95023	-1.58418	12487	3	ZC3H3_2; ZC3H3_4; ZC3H3_3	4	23144	Q8IXZ2	566	23144	51491	Q9Y3C1	ZC3H3	NOP16	1.00062e-11	0.0676471	0.932353	12
1223	ZC3H3	-0.428164	-0.407563	0.0049012	0.0104132	-0.95023	-1.58418	12487	3	ZC3H3_2; ZC3H3_4; ZC3H3_3	4	23144	Q8IXZ2	566	23144	1662	Q13206	ZC3H3	DDX10	1.3511e-09	0.142048	0.857952	12
1224	ZC3H3	-0.428164	-0.407563	0.0049012	0.0104132	-0.95023	-1.58418	12487	3	ZC3H3_2; ZC3H3_4; ZC3H3_3	4	23144	Q8IXZ2	566	23144	65095	Q8N9T8	ZC3H3	KRI1	2.90012e-11	0.0837514	0.916249	12
1225	ZC3H3	-0.428164	-0.407563	0.0049012	0.0104132	-0.95023	-1.58418	12487	3	ZC3H3_2; ZC3H3_4; ZC3H3_3	4	23144	Q8IXZ2	566	23144	84294	Q9BRU9	ZC3H3	UTP23	0.0498881	0.00564856	0.944463	12
1226	ZC3H3	-0.428164	-0.407563	0.0049012	0.0104132	-0.95023	-1.58418	12487	3	ZC3H3_2; ZC3H3_4; ZC3H3_3	4	23144	Q8IXZ2	566	23144	55922	O15226	ZC3H3	NKRF	7.64684e-13	0.111652	0.888348	12
1227	ZC3H3	-0.428164	-0.407563	0.0049012	0.0104132	-0.95023	-1.58418	12487	3	ZC3H3_2; ZC3H3_4; ZC3H3_3	4	23144	Q8IXZ2	566	23144	11103	Q13601	ZC3H3	KRR1	6.60385e-06	0.0275067	0.972487	12
1228	ZC3H3	-0.428164	-0.407563	0.0049012	0.0104132	-0.95023	-1.58418	12487	3	ZC3H3_2; ZC3H3_4; ZC3H3_3	4	23144	Q8IXZ2	566	23144	10664	P49711	ZC3H3	CTCF	1.5327e-08	0.0326827	0.967317	12
1229	ZC3H3	-0.428164	-0.407563	0.0049012	0.0104132	-0.95023	-1.58418	12487	3	ZC3H3_2; ZC3H3_4; ZC3H3_3	4	23144	Q8IXZ2	566	23144	51634	Q9Y388	ZC3H3	RBMX2	0.0461938	0.00190229	0.951904	12
1230	ZC3H3	-0.428164	-0.407563	0.0049012	0.0104132	-0.95023	-1.58418	12487	3	ZC3H3_2; ZC3H3_4; ZC3H3_3	4	23144	Q8IXZ2	566	23144	79050	Q9BVI4	ZC3H3	NOC4L	0.000247877	0.00711947	0.992633	12
1231	ZC3H3	-0.428164	-0.407563	0.0049012	0.0104132	-0.95023	-1.58418	12487	3	ZC3H3_2; ZC3H3_4; ZC3H3_3	4	23144	Q8IXZ2	566	23144	55216	Q6ZUT1	ZC3H3	C11orf57	3.37213e-05	0.0179502	0.982016	12
1232	ZC3H3	-0.428164	-0.407563	0.0049012	0.0104132	-0.95023	-1.58418	12487	3	ZC3H3_2; ZC3H3_4; ZC3H3_3	4	23144	Q8IXZ2	566	23144	66036	Q96QG7	ZC3H3	MTMR9	0.000379942	0.00205222	0.997568	12
1233	BACH1	-0.427095	-0.411552	0.00270554	0.0071004	-0.931902	-1.67269	6990	4	BACH1_2; BACH1_4; BACH1_1; BACH1_3	4	571	O14867	569	571	9935	Q9Y5Q3	BACH1	MAFB	8.86543e-09	1.4447e-06	0.999999	2	4	BP-SMAD complex; BRCA1 B complex; BRCA1-BARD1-BACH1-DNA damage complex II; BRCA1-BARD1-BACH1-DNA damage complex I	8; 3; 8; 6	1; 1; 1; 1	443; 2788; 2815; 2817
1234	BACH1	-0.427095	-0.411552	0.00270554	0.0071004	-0.931902	-1.67269	6990	4	BACH1_2; BACH1_4; BACH1_1; BACH1_3	4	571	O14867	569	571	7922	Q92504	BACH1	SLC39A7	1.92406e-10	2.69223e-05	0.999973	2	4	BP-SMAD complex; BRCA1 B complex; BRCA1-BARD1-BACH1-DNA damage complex II; BRCA1-BARD1-BACH1-DNA damage complex I	8; 3; 8; 6	1; 1; 1; 1	443; 2788; 2815; 2817
1235	USP19	-0.426111	-0.426111	0.0374016	0.0417778	-0.936106	-1.41461	94213	2	USP19_1; USP19_4	4	10869	O94966	570	10869	10533	O95352	USP19	ATG7	3.45716e-06	0.057689	0.942308	2
1236	USP19	-0.426111	-0.426111	0.0374016	0.0417778	-0.936106	-1.41461	94213	2	USP19_1; USP19_4	4	10869	O94966	570	10869	6477	Q8IUQ4	USP19	SIAH1	1.96084e-06	0.123872	0.876126	2
1237	LIMS1	-0.425892	-0.425892	0.0160541	0.0225397	-0.961048	-1.4523	40439	2	LIMS1_2; LIMS1_3	4	3987	P48059	571	3987	6251	Q15404	LIMS1	RSU1	2.87078e-22	2.82907e-11	1	2	1	ILK-LIMS1-PARVA complex	3	2	6919
1238	LIMS1	-0.425892	-0.425892	0.0160541	0.0225397	-0.961048	-1.4523	40439	2	LIMS1_2; LIMS1_3	4	3987	P48059	571	3987	3611	Q13418	LIMS1	ILK	6.05461e-22	7.09318e-10	1	2	1	ILK-LIMS1-PARVA complex	3	2	6919
1239	DHX36	-0.42584	-0.42584	0.0201411	0.026558	-0.955511	-1.44393	50734	2	DHX36_2; DHX36_4	4	170506	Q9H2U1	572	170506	6223	P39019	DHX36	RPS19	0.000159138	0.121584	0.878256	6
1240	DHX36	-0.42584	-0.42584	0.0201411	0.026558	-0.955511	-1.44393	50734	2	DHX36_2; DHX36_4	4	170506	Q9H2U1	572	170506	6426	Q07955	DHX36	SRSF1	0.0365301	0.00557288	0.957897	6
1241	DHX36	-0.42584	-0.42584	0.0201411	0.026558	-0.955511	-1.44393	50734	2	DHX36_2; DHX36_4	4	170506	Q9H2U1	572	170506	3921	P08865	DHX36	RPSA	0.000624044	0.104324	0.895052	6
1242	DHX36	-0.42584	-0.42584	0.0201411	0.026558	-0.955511	-1.44393	50734	2	DHX36_2; DHX36_4	4	170506	Q9H2U1	572	170506	11103	Q13601	DHX36	KRR1	0.0897251	0.0308502	0.879425	6
1243	DHX36	-0.42584	-0.42584	0.0201411	0.026558	-0.955511	-1.44393	50734	2	DHX36_2; DHX36_4	4	170506	Q9H2U1	572	170506	57696	Q8NHQ9	DHX36	DDX55	7.14735e-12	0.042684	0.957316	6
1244	DHX36	-0.42584	-0.42584	0.0201411	0.026558	-0.955511	-1.44393	50734	2	DHX36_2; DHX36_4	4	170506	Q9H2U1	572	170506	3608	Q12905	DHX36	ILF2	4.349e-08	0.00929394	0.990706	6
1245	DERL2	-0.425006	-0.315499	0.0141372	0.0211321	-0.923925	-1.54033	36020	3	DERL2_3; DERL2_1; DERL2_4	4	51009	Q9GZP9	573	51009	51552	P61106	DERL2	RAB14	1.29551e-10	0.115635	0.884365	1	4	VCP-VIMP-DERL2 complex; VCP-VIMP-DERL1-DERL2-HRD1-SEL1L complex; SELK multiprotein complex; HRD1 complex	3; 6; 10; 13	1; 2; 4; 1	4998; 4999; 6131; 6859
1246	IMMT	-0.424371	-0.424371	0.0488459	0.0515076	-0.92519	-1.39811	123041	2	IMMT_3; IMMT_1	4	10989	Q16891	574	10989	2531	Q06136	IMMT	KDSR	1.11363e-18	0.224559	0.775441	1	2	MIB complex; MICOS complex	11; 7	1; 1	6249; 6255
1247	USF2	-0.422355	-0.439677	0.00395573	0.00913646	-0.954233	-1.59086	10078	3	USF2_1; USF2_2; USF2_4	4	7392	Q15853	577	7392	2355	P15408	USF2	FOSL2	0.000700148	0.000934082	0.998366	1	1	USF1-USF2 complex	2	1	6579
1248	PPIL2	-0.422305	-0.478297	0.0133947	0.0202761	-0.925615	-1.54314	34128	3	PPIL2_2; PPIL2_4; PPIL2_1	4	23759	Q13356	578	23759	79269	Q5QP82	PPIL2	DCAF10	7.72627e-16	0.00682907	0.993171	2	1	Spliceosome	143	9	351
1249	PPIL2	-0.422305	-0.478297	0.0133947	0.0202761	-0.925615	-1.54314	34128	3	PPIL2_2; PPIL2_4; PPIL2_1	4	23759	Q13356	578	23759	84191	Q9H5X1	PPIL2	FAM96A	0.00171451	0.00976874	0.988517	2	1	Spliceosome	143	9	351
1250	MEF2D	-0.421342	-0.421342	0.0299962	0.0352367	-0.943814	-1.42626	75559	2	MEF2D_1; MEF2D_3	4	4209	Q14814	582	4209	3312	P11142	MEF2D	HSPA8	0.0173403	6.53691e-07	0.982659	1
1251	SNRPB2	-0.421154	-0.421154	0.0191093	0.0256222	-0.95686	-1.44597	48135	2	SNRPB2_1; SNRPB2_2	4	6629	P08579	583	6629	114034	Q96GM8	SNRPB2	TOE1	5.07445e-10	0.000694989	0.999305	1	4	Spliceosome; C complex spliceosome; SMN-PolII-RHA complex; 17S U2 snRNP	143; 80; 10; 33	9; 3; 1; 2	351; 1181; 1749; 2755
1252	BIRC6	-0.419606	-0.419606	0.0274817	0.0327949	-0.946653	-1.43055	69225	2	BIRC6_2; BIRC6_3	4	57448	Q9NR09	585	57448	5537	O00743	BIRC6	PPP6C	3.10363e-13	0.00994321	0.990057	3
1253	BIRC6	-0.419606	-0.419606	0.0274817	0.0327949	-0.946653	-1.43055	69225	2	BIRC6_2; BIRC6_3	4	57448	Q9NR09	585	57448	28952	O60826	BIRC6	CCDC22	5.87755e-14	0.0509295	0.949071	3
1254	BIRC6	-0.419606	-0.419606	0.0274817	0.0327949	-0.946653	-1.43055	69225	2	BIRC6_2; BIRC6_3	4	57448	Q9NR09	585	57448	129285	Q6ZMI0	BIRC6	PPP1R21	8.76978e-14	0.00180253	0.998197	3
1255	STRN	-0.419255	-0.419255	0.0523275	0.0547756	-0.922024	-1.39333	131811	2	STRN_1; STRN_4	4	6801	O43815	586	6801	5518	P30153	STRN	PPP2R1A	2.36533e-23	9.12226e-05	0.999909	3	1	PP2A A/C-striatin complex	3	2	6182
1256	STRN	-0.419255	-0.419255	0.0523275	0.0547756	-0.922024	-1.39333	131811	2	STRN_1; STRN_4	4	6801	O43815	586	6801	25843	Q9Y3A3	STRN	MOB4	7.28234e-08	1.09278e-07	1	3	1	PP2A A/C-striatin complex	3	2	6182
1257	STRN	-0.419255	-0.419255	0.0523275	0.0547756	-0.922024	-1.39333	131811	2	STRN_1; STRN_4	4	6801	O43815	586	6801	9448	O95819	STRN	MAP4K4	7.86727e-06	0.031132	0.96886	3	1	PP2A A/C-striatin complex	3	2	6182
1258	YY1	-0.418686	-0.418686	0.0190263	0.0255588	-0.956974	-1.44614	47926	2	YY1_1; YY1_4	4	7528	P25490	587	7528	29844	P0C1Z6	YY1	TFPT	3.66645e-08	0.177644	0.822356	2	8	Polycomb repressive complex 1 (PRC1, hPRC-H); Ku antigen-YY1-alphaMyHC promoter complex; YY1-Notch1-RBP-Jkappa complex; YY1-Notch1 complex; hs4 enhancer complex (faster migrating complex); hs4 enhancer complex (slow migrating complex); YY1-MDM2-p53 complex; EED-EZH-YY1 polycomb complex	13; 3; 3; 2; 5; 2; 3; 3	2; 3; 1; 1; 1; 1; 1; 1	116; 2918; 2946; 2947; 3045; 3046; 5331; 5502
1259	YY1	-0.418686	-0.418686	0.0190263	0.0255588	-0.956974	-1.44614	47926	2	YY1_1; YY1_4	4	7528	P25490	587	7528	54617	Q9ULG1	YY1	INO80	3.14277e-12	6.50104e-06	0.999993	2	8	Polycomb repressive complex 1 (PRC1, hPRC-H); Ku antigen-YY1-alphaMyHC promoter complex; YY1-Notch1-RBP-Jkappa complex; YY1-Notch1 complex; hs4 enhancer complex (faster migrating complex); hs4 enhancer complex (slow migrating complex); YY1-MDM2-p53 complex; EED-EZH-YY1 polycomb complex	13; 3; 3; 2; 5; 2; 3; 3	2; 3; 1; 1; 1; 1; 1; 1	116; 2918; 2946; 2947; 3045; 3046; 5331; 5502
1260	NAB1	-0.418597	-0.418597	0.0210192	0.0273632	-0.954418	-1.44228	52946	2	NAB1_2; NAB1_4	4	4664	Q13506	588	4664	1958	P18146	NAB1	EGR1	5.10529e-05	0.000925404	0.999024	1
1261	TAF1C	-0.418141	-0.418141	0.0345933	0.0391912	-0.938945	-1.4189	87139	2	TAF1C_4; TAF1C_2	4	9013	Q15572	589	9013	6208	P62263	TAF1C	RPS14	2.54564e-24	0.0114575	0.988543	3	1	TBP-TAF complex	4	1	5727
1262	TAF1C	-0.418141	-0.418141	0.0345933	0.0391912	-0.938945	-1.4189	87139	2	TAF1C_4; TAF1C_2	4	9013	Q15572	589	9013	3312	P11142	TAF1C	HSPA8	3.21568e-18	0.248913	0.751087	3	1	TBP-TAF complex	4	1	5727
1263	TAF1C	-0.418141	-0.418141	0.0345933	0.0391912	-0.938945	-1.4189	87139	2	TAF1C_4; TAF1C_2	4	9013	Q15572	589	9013	9045	P50914	TAF1C	RPL14	2.83341e-08	0.11004	0.88996	3	1	TBP-TAF complex	4	1	5727
1264	ARPC5	-0.416387	-0.416387	0.0279815	0.0333233	-0.946086	-1.42969	70484	2	ARPC5_4; ARPC5_3	4	10092	O15511	590	10092	10096	P61158	ARPC5	ACTR3	1.3745e-28	0.00129389	0.998706	4	1	Arp2/3 protein complex	7	7	27
1265	ARPC5	-0.416387	-0.416387	0.0279815	0.0333233	-0.946086	-1.42969	70484	2	ARPC5_4; ARPC5_3	4	10092	O15511	590	10092	10094	O15145	ARPC5	ARPC3	8.15885e-27	0.00750771	0.992492	4	1	Arp2/3 protein complex	7	7	27
1266	ARPC5	-0.416387	-0.416387	0.0279815	0.0333233	-0.946086	-1.42969	70484	2	ARPC5_4; ARPC5_3	4	10092	O15511	590	10092	10093	P59998	ARPC5	ARPC4	3.49717e-24	0.000395246	0.999605	4	1	Arp2/3 protein complex	7	7	27
1267	ARPC5	-0.416387	-0.416387	0.0279815	0.0333233	-0.946086	-1.42969	70484	2	ARPC5_4; ARPC5_3	4	10092	O15511	590	10092	10095	O15143	ARPC5	ARPC1B	2.75856e-27	0.00601424	0.993986	4	1	Arp2/3 protein complex	7	7	27
1268	BSCL2	-0.413227	-0.413227	0.029951	0.0352367	-0.943871	-1.42634	75445	2	BSCL2_3; BSCL2_4	4	26580	Q96G97	591	26580	79651	Q6PJF5	BSCL2	RHBDF2	9.77287e-10	0.000541802	0.999458	4
1269	BSCL2	-0.413227	-0.413227	0.029951	0.0352367	-0.943871	-1.42634	75445	2	BSCL2_3; BSCL2_4	4	26580	Q96G97	591	26580	6307	Q15800	BSCL2	MSMO1	0.000218062	0.146343	0.853439	4
1270	BSCL2	-0.413227	-0.413227	0.029951	0.0352367	-0.943871	-1.42634	75445	2	BSCL2_3; BSCL2_4	4	26580	Q96G97	591	26580	9197	O00400	BSCL2	SLC33A1	3.44247e-08	0.191816	0.808184	4
1271	BSCL2	-0.413227	-0.413227	0.029951	0.0352367	-0.943871	-1.42634	75445	2	BSCL2_3; BSCL2_4	4	26580	Q96G97	591	26580	79139	Q9BUN8	BSCL2	DERL1	5.786e-12	0.0152981	0.984702	4
1272	JUNB	-0.412388	-0.412388	0.0243015	0.0299998	-0.950415	-1.43623	61214	2	JUNB_1; JUNB_2	4	3726	P17275	592	3726	3725	P05412	JUNB	JUN	2.59575e-05	0.00123984	0.998734	5
1273	JUNB	-0.412388	-0.412388	0.0243015	0.0299998	-0.950415	-1.43623	61214	2	JUNB_1; JUNB_2	4	3726	P17275	592	3726	467	P18847	JUNB	ATF3	2.96061e-09	2.02828e-08	1	5
1274	JUNB	-0.412388	-0.412388	0.0243015	0.0299998	-0.950415	-1.43623	61214	2	JUNB_1; JUNB_2	4	3726	P17275	592	3726	80204	Q86XK2	JUNB	FBXO11	2.35775e-06	0.159377	0.840621	5
1275	JUNB	-0.412388	-0.412388	0.0243015	0.0299998	-0.950415	-1.43623	61214	2	JUNB_1; JUNB_2	4	3726	P17275	592	3726	2355	P15408	JUNB	FOSL2	1.65867e-15	1.31712e-13	1	5
1276	JUNB	-0.412388	-0.412388	0.0243015	0.0299998	-0.950415	-1.43623	61214	2	JUNB_1; JUNB_2	4	3726	P17275	592	3726	57117	Q96CB8	JUNB	INTS12	6.72111e-07	0.0967729	0.903226	5
1277	GFER	-0.408	-0.360658	0.0101863	0.0169221	-0.897619	-1.61116	26320	4	GFER_3; GFER_4; GFER_1; GFER_2	4	2671	P55789	597	2671	10533	O95352	GFER	ATG7	0.000497566	0.0585972	0.940905	3
1278	GFER	-0.408	-0.360658	0.0101863	0.0169221	-0.897619	-1.61116	26320	4	GFER_3; GFER_4; GFER_1; GFER_2	4	2671	P55789	597	2671	10542	O43504	GFER	LAMTOR5	0.000130855	0.0653301	0.934539	3
1279	GFER	-0.408	-0.360658	0.0101863	0.0169221	-0.897619	-1.61116	26320	4	GFER_3; GFER_4; GFER_1; GFER_2	4	2671	P55789	597	2671	26519	P62072	GFER	TIMM10	2.21393e-07	0.168741	0.831259	3
1280	TOE1	-0.407269	-0.407269	0.0274234	0.0327799	-0.946724	-1.43065	69078	2	TOE1_3; TOE1_4	4	114034	Q96GM8	598	114034	6223	P39019	TOE1	RPS19	5.11342e-12	0.000709724	0.99929	4	1	12S U11 snRNP	15	1	1068
1281	TOE1	-0.407269	-0.407269	0.0274234	0.0327799	-0.946724	-1.43065	69078	2	TOE1_3; TOE1_4	4	114034	Q96GM8	598	114034	6629	P08579	TOE1	SNRPB2	5.07445e-10	0.000694989	0.999305	4	1	12S U11 snRNP	15	1	1068
1282	TOE1	-0.407269	-0.407269	0.0274234	0.0327799	-0.946724	-1.43065	69078	2	TOE1_3; TOE1_4	4	114034	Q96GM8	598	114034	84294	Q9BRU9	TOE1	UTP23	5.9686e-09	0.020789	0.979211	4	1	12S U11 snRNP	15	1	1068
1283	TOE1	-0.407269	-0.407269	0.0274234	0.0327799	-0.946724	-1.43065	69078	2	TOE1_3; TOE1_4	4	114034	Q96GM8	598	114034	11103	Q13601	TOE1	KRR1	1.97639e-09	0.00893142	0.991069	4	1	12S U11 snRNP	15	1	1068
1284	RAP2C	-0.406323	-0.406323	0.0229577	0.0288888	-0.952048	-1.4387	57829	2	RAP2C_3; RAP2C_4	4	57826	Q9Y3L5	602	57826	9448	O95819	RAP2C	MAP4K4	8.6769e-16	3.55799e-06	0.999996	2
1285	RAP2C	-0.406323	-0.406323	0.0229577	0.0288888	-0.952048	-1.4387	57829	2	RAP2C_3; RAP2C_4	4	57826	Q9Y3L5	602	57826	5082	Q13371	RAP2C	PDCL	2.31533e-05	0.221658	0.778319	2
1286	SLC7A1	-0.405473	-0.405473	0.0216075	0.0277756	-0.953709	-1.44121	54428	2	SLC7A1_4; SLC7A1_2	4	6541	P30825	603	6541	440138	Q2TAA5	SLC7A1	ALG11	4.89878e-10	0.249416	0.750584	2
1287	SLC7A1	-0.405473	-0.405473	0.0216075	0.0277756	-0.953709	-1.44121	54428	2	SLC7A1_4; SLC7A1_2	4	6541	P30825	603	6541	81537	Q9BX95	SLC7A1	SGPP1	6.90204e-06	0.0233274	0.976666	2
1288	ZNF382	-0.404093	-0.404093	0.0300919	0.0352367	-0.943715	-1.42611	75800	2	ZNF382_1; ZNF382_3	4	84911	Q96SR6	606	84911	10155	Q13263	ZNF382	TRIM28	6.54293e-19	0.225458	0.774542	1
1289	EXOSC1	-0.403258	-0.403258	0.0220141	0.0281156	-0.953212	-1.44046	55452	2	EXOSC1_1; EXOSC1_3	4	51013	Q9Y3B2	607	51013	11340	Q96B26	EXOSC1	EXOSC8	1.5026e-27	4.92264e-05	0.999951	2	2	Exosome; Exosome	23; 23	7; 7	789; 7443
1290	EXOSC1	-0.403258	-0.403258	0.0220141	0.0281156	-0.953212	-1.44046	55452	2	EXOSC1_1; EXOSC1_3	4	51013	Q9Y3B2	607	51013	56915	Q9NQT4	EXOSC1	EXOSC5	7.99238e-26	4.59287e-05	0.999954	2	2	Exosome; Exosome	23; 23	7; 7	789; 7443
1291	CXXC1	-0.401616	-0.422952	0.0089417	0.0156153	-0.936815	-1.56182	22782	3	CXXC1_1; CXXC1_2; CXXC1_3	4	30827	Q9P0U4	609	30827	23067	Q9UPS6	CXXC1	SETD1B	3.10697e-10	1.3895e-07	1	5	4	Set1B complex; Set1A complex; Set1A complex; Set1B complex	18; 16; 16; 18	9; 7; 7; 9	2730; 2731; 6469; 6470
1292	CXXC1	-0.401616	-0.422952	0.0089417	0.0156153	-0.936815	-1.56182	22782	3	CXXC1_1; CXXC1_2; CXXC1_3	4	30827	Q9P0U4	609	30827	9070	Q9UBL3	CXXC1	ASH2L	1.07228e-23	6.85072e-09	1	5	4	Set1B complex; Set1A complex; Set1A complex; Set1B complex	18; 16; 16; 18	9; 7; 7; 9	2730; 2731; 6469; 6470
1293	CXXC1	-0.401616	-0.422952	0.0089417	0.0156153	-0.936815	-1.56182	22782	3	CXXC1_1; CXXC1_2; CXXC1_3	4	30827	Q9P0U4	609	30827	5929	Q15291	CXXC1	RBBP5	1.23375e-27	7.01594e-09	1	5	4	Set1B complex; Set1A complex; Set1A complex; Set1B complex	18; 16; 16; 18	9; 7; 7; 9	2730; 2731; 6469; 6470
1294	CXXC1	-0.401616	-0.422952	0.0089417	0.0156153	-0.936815	-1.56182	22782	3	CXXC1_1; CXXC1_2; CXXC1_3	4	30827	Q9P0U4	609	30827	1616	Q9UER7	CXXC1	DAXX	2.3076e-11	0.00150398	0.998496	5	4	Set1B complex; Set1A complex; Set1A complex; Set1B complex	18; 16; 16; 18	9; 7; 7; 9	2730; 2731; 6469; 6470
1295	CXXC1	-0.401616	-0.422952	0.0089417	0.0156153	-0.936815	-1.56182	22782	3	CXXC1_1; CXXC1_2; CXXC1_3	4	30827	Q9P0U4	609	30827	5305	P48426	CXXC1	PIP4K2A	1.65699e-05	0.0184114	0.981572	5	4	Set1B complex; Set1A complex; Set1A complex; Set1B complex	18; 16; 16; 18	9; 7; 7; 9	2730; 2731; 6469; 6470
1296	SARNP	-0.40063	-0.40063	0.0300582	0.0352367	-0.943743	-1.42615	75715	2	SARNP_3; SARNP_1	4	84324	P82979	611	84324	9984	Q96FV9	SARNP	THOC1	5.11695e-16	0.233211	0.766789	1
1297	TXNDC11	-0.400124	-0.400124	0.0217687	0.0279326	-0.95351	-1.44091	54834	2	TXNDC11_2; TXNDC11_3	4	51061	Q6PKC3	612	51061	1387	Q92793	TXNDC11	CREBBP	6.50966e-07	0.0101266	0.989873	1
1298	TRIM33	-0.400074	-0.387505	0.00962068	0.0163232	-0.93497	-1.55874	24512	3	TRIM33_4; TRIM33_1; TRIM33_2	4	51592	Q9UPN9	613	51592	3312	P11142	TRIM33	HSPA8	0.00176316	0.0689472	0.92929	2	4	Kaiso-NCOR complex; Ectodermin-SMAD4 complex; RSmad complex; TIF1gamma-SMAD2-SMAD3 complex	10; 2; 10; 3	3; 1; 3; 1	2183; 2704; 2829; 2830
1299	TRIM33	-0.400074	-0.387505	0.00962068	0.0163232	-0.93497	-1.55874	24512	3	TRIM33_4; TRIM33_1; TRIM33_2	4	51592	Q9UPN9	613	51592	10155	Q13263	TRIM33	TRIM28	1.22213e-07	0.00500517	0.994995	2	4	Kaiso-NCOR complex; Ectodermin-SMAD4 complex; RSmad complex; TIF1gamma-SMAD2-SMAD3 complex	10; 2; 10; 3	3; 1; 3; 1	2183; 2704; 2829; 2830
1300	DCAF10	-0.397328	-0.397328	0.0239164	0.0297222	-0.950898	-1.43696	60244	2	DCAF10_3; DCAF10_4	4	79269	Q5QP82	618	79269	93973	Q9H981	DCAF10	ACTR8	1.53768e-16	0.063089	0.936911	3
1301	DCAF10	-0.397328	-0.397328	0.0239164	0.0297222	-0.950898	-1.43696	60244	2	DCAF10_3; DCAF10_4	4	79269	Q5QP82	618	79269	8668	Q13347	DCAF10	EIF3I	1.41249e-15	0.00222061	0.997779	3
1302	DCAF10	-0.397328	-0.397328	0.0239164	0.0297222	-0.950898	-1.43696	60244	2	DCAF10_3; DCAF10_4	4	79269	Q5QP82	618	79269	23759	Q13356	DCAF10	PPIL2	7.72627e-16	0.00682907	0.993171	3
1303	E4F1	-0.394055	-0.394055	0.0263031	0.0318663	-0.948016	-1.43261	66256	2	E4F1_4; E4F1_1	4	1877	Q66K89	622	1877	65095	Q8N9T8	E4F1	KRI1	8.54673e-10	0.174492	0.825508	1
1304	SMEK1	-0.393862	-0.393862	0.0258565	0.0314851	-0.94857	-1.43344	65131	2	SMEK1_2; SMEK1_3	4	55671	Q6IN85	623	55671	5524	Q15257	SMEK1	PPP2R4	6.86803e-11	0.0640564	0.935944	4
1305	SMEK1	-0.393862	-0.393862	0.0258565	0.0314851	-0.94857	-1.43344	65131	2	SMEK1_2; SMEK1_3	4	55671	Q6IN85	623	55671	51400	Q9Y570	SMEK1	PPME1	0.000231789	0.100574	0.899194	4
1306	SMEK1	-0.393862	-0.393862	0.0258565	0.0314851	-0.94857	-1.43344	65131	2	SMEK1_2; SMEK1_3	4	55671	Q6IN85	623	55671	90060	Q96HB5	SMEK1	CCDC120	0.000139164	0.0744399	0.925421	4
1307	SMEK1	-0.393862	-0.393862	0.0258565	0.0314851	-0.94857	-1.43344	65131	2	SMEK1_2; SMEK1_3	4	55671	Q6IN85	623	55671	129285	Q6ZMI0	SMEK1	PPP1R21	0.00371631	0.0205294	0.975754	4
1308	HNRNPLL	-0.390684	-0.390684	0.0449495	0.0483241	-0.92881	-1.40358	113226	2	HNRNPLL_3; HNRNPLL_4	4	92906	Q8WVV9	626	92906	8841	O15379	HNRNPLL	HDAC3	7.6292e-05	0.0488801	0.951044	1
1309	KTI12	-0.390261	-0.386157	0.0139241	0.0208665	-0.924408	-1.54113	35477	3	KTI12_1; KTI12_2; KTI12_4	4	112970	Q96EK9	627	112970	55140	Q9H9T3	KTI12	ELP3	3.72321e-05	4.85429e-10	0.999963	1
1310	WWP2	-0.388338	-0.434307	0.0160863	0.0225397	-0.919837	-1.53351	40986	3	WWP2_3; WWP2_2; WWP2_1	4	11060	O00308	628	11060	8289	O14497	WWP2	ARID1A	7.28148e-15	0.0438652	0.956135	12
1311	WWP2	-0.388338	-0.434307	0.0160863	0.0225397	-0.919837	-1.53351	40986	3	WWP2_3; WWP2_2; WWP2_1	4	11060	O00308	628	11060	6601	Q8TAQ2	WWP2	SMARCC2	4.87395e-17	0.0683657	0.931634	12
1312	WWP2	-0.388338	-0.434307	0.0160863	0.0225397	-0.919837	-1.53351	40986	3	WWP2_3; WWP2_2; WWP2_1	4	11060	O00308	628	11060	6603	Q92925	WWP2	SMARCD2	1.09888e-10	0.0163295	0.983671	12
1313	WWP2	-0.388338	-0.434307	0.0160863	0.0225397	-0.919837	-1.53351	40986	3	WWP2_3; WWP2_2; WWP2_1	4	11060	O00308	628	11060	5431	P30876	WWP2	POLR2B	8.11201e-17	0.0370772	0.962923	12
1314	WWP2	-0.388338	-0.434307	0.0160863	0.0225397	-0.919837	-1.53351	40986	3	WWP2_3; WWP2_2; WWP2_1	4	11060	O00308	628	11060	8239	Q93008	WWP2	USP9X	6.6125e-15	0.010134	0.989866	12
1315	WWP2	-0.388338	-0.434307	0.0160863	0.0225397	-0.919837	-1.53351	40986	3	WWP2_3; WWP2_2; WWP2_1	4	11060	O00308	628	11060	58490	Q9NQG5	WWP2	RPRD1B	0.00228935	0.0987531	0.898958	12
1316	WWP2	-0.388338	-0.434307	0.0160863	0.0225397	-0.919837	-1.53351	40986	3	WWP2_3; WWP2_2; WWP2_1	4	11060	O00308	628	11060	56252	P49750	WWP2	YLPM1	4.43327e-13	0.00166996	0.99833	12
1317	WWP2	-0.388338	-0.434307	0.0160863	0.0225397	-0.919837	-1.53351	40986	3	WWP2_3; WWP2_2; WWP2_1	4	11060	O00308	628	11060	6598	Q12824	WWP2	SMARCB1	1.17371e-16	0.080806	0.919194	12
1318	WWP2	-0.388338	-0.434307	0.0160863	0.0225397	-0.919837	-1.53351	40986	3	WWP2_3; WWP2_2; WWP2_1	4	11060	O00308	628	11060	80204	Q86XK2	WWP2	FBXO11	1.00552e-09	0.00272892	0.997271	12
1319	WWP2	-0.388338	-0.434307	0.0160863	0.0225397	-0.919837	-1.53351	40986	3	WWP2_3; WWP2_2; WWP2_1	4	11060	O00308	628	11060	5438	P36954	WWP2	POLR2I	1.24735e-06	0.00549835	0.9945	12
1320	WWP2	-0.388338	-0.434307	0.0160863	0.0225397	-0.919837	-1.53351	40986	3	WWP2_3; WWP2_2; WWP2_1	4	11060	O00308	628	11060	149041	Q5TC82	WWP2	RC3H1	8.30334e-09	2.01821e-09	1	12
1321	WWP2	-0.388338	-0.434307	0.0160863	0.0225397	-0.919837	-1.53351	40986	3	WWP2_3; WWP2_2; WWP2_1	4	11060	O00308	628	11060	51184	Q9UHW5	WWP2	GPN3	3.72939e-11	0.00431738	0.995683	12
1322	CCDC120	-0.388016	-0.388016	0.0340038	0.038707	-0.939556	-1.41982	85654	2	CCDC120_3; CCDC120_4	4	90060	Q96HB5	629	90060	55671	Q6IN85	CCDC120	SMEK1	0.000139164	0.0744399	0.925421	2
1323	CCDC120	-0.388016	-0.388016	0.0340038	0.038707	-0.939556	-1.41982	85654	2	CCDC120_3; CCDC120_4	4	90060	Q96HB5	629	90060	10533	O95352	CCDC120	ATG7	1.94637e-06	0.197175	0.802824	2
1324	VAC14	-0.387791	-0.387791	0.0219644	0.0281156	-0.953269	-1.44054	55327	2	VAC14_4; VAC14_3	4	55697	Q08AM6	630	55697	1801	Q9BZG8	VAC14	DPH1	1.21583e-05	0.180055	0.819933	1
1325	SNAPIN	-0.387269	-0.387269	0.0389487	0.0431691	-0.934587	-1.41231	98110	2	SNAPIN_1; SNAPIN_2	4	23557	O95295	632	23557	389541	Q0VGL1	SNAPIN	LAMTOR4	5.1468e-12	0.0181262	0.981874	14	5	BLOC-1 (biogenesis of lysosome-related organelles complex 1); AP3-BLOC1 complex; BLOC1-BLOC2 complex; dysbindin-Snapin-BLOS2 complex; BORC complex	8; 15; 11; 3; 8	3; 3; 3; 2; 8	23; 652; 654; 6416; 7545
1326	SNAPIN	-0.387269	-0.387269	0.0389487	0.0431691	-0.934587	-1.41231	98110	2	SNAPIN_1; SNAPIN_2	4	23557	O95295	632	23557	119032	Q96B45	SNAPIN	C10orf32	6.4226e-12	7.74368e-06	0.999992	14	5	BLOC-1 (biogenesis of lysosome-related organelles complex 1); AP3-BLOC1 complex; BLOC1-BLOC2 complex; dysbindin-Snapin-BLOS2 complex; BORC complex	8; 15; 11; 3; 8	3; 3; 3; 2; 8	23; 652; 654; 6416; 7545
1327	SNAPIN	-0.387269	-0.387269	0.0389487	0.0431691	-0.934587	-1.41231	98110	2	SNAPIN_1; SNAPIN_2	4	23557	O95295	632	23557	729991	Q96FH0	SNAPIN	MEF2BNB	1.04305e-12	4.53495e-06	0.999995	14	5	BLOC-1 (biogenesis of lysosome-related organelles complex 1); AP3-BLOC1 complex; BLOC1-BLOC2 complex; dysbindin-Snapin-BLOS2 complex; BORC complex	8; 15; 11; 3; 8	3; 3; 3; 2; 8	23; 652; 654; 6416; 7545
1328	SNAPIN	-0.387269	-0.387269	0.0389487	0.0431691	-0.934587	-1.41231	98110	2	SNAPIN_1; SNAPIN_2	4	23557	O95295	632	23557	2647	P78537	SNAPIN	BLOC1S1	9.69156e-13	3.75039e-06	0.999996	14	5	BLOC-1 (biogenesis of lysosome-related organelles complex 1); AP3-BLOC1 complex; BLOC1-BLOC2 complex; dysbindin-Snapin-BLOS2 complex; BORC complex	8; 15; 11; 3; 8	3; 3; 3; 2; 8	23; 652; 654; 6416; 7545
1329	SNAPIN	-0.387269	-0.387269	0.0389487	0.0431691	-0.934587	-1.41231	98110	2	SNAPIN_1; SNAPIN_2	4	23557	O95295	632	23557	91949	P83436	SNAPIN	COG7	5.30933e-07	0.111486	0.888513	14	5	BLOC-1 (biogenesis of lysosome-related organelles complex 1); AP3-BLOC1 complex; BLOC1-BLOC2 complex; dysbindin-Snapin-BLOS2 complex; BORC complex	8; 15; 11; 3; 8	3; 3; 3; 2; 8	23; 652; 654; 6416; 7545
1330	SNAPIN	-0.387269	-0.387269	0.0389487	0.0431691	-0.934587	-1.41231	98110	2	SNAPIN_1; SNAPIN_2	4	23557	O95295	632	23557	8649	Q9UHA4	SNAPIN	LAMTOR3	1.50008e-05	0.179738	0.820247	14	5	BLOC-1 (biogenesis of lysosome-related organelles complex 1); AP3-BLOC1 complex; BLOC1-BLOC2 complex; dysbindin-Snapin-BLOS2 complex; BORC complex	8; 15; 11; 3; 8	3; 3; 3; 2; 8	23; 652; 654; 6416; 7545
1331	SNAPIN	-0.387269	-0.387269	0.0389487	0.0431691	-0.934587	-1.41231	98110	2	SNAPIN_1; SNAPIN_2	4	23557	O95295	632	23557	55004	Q6IAA8	SNAPIN	LAMTOR1	8.08456e-11	0.00604842	0.993952	14	5	BLOC-1 (biogenesis of lysosome-related organelles complex 1); AP3-BLOC1 complex; BLOC1-BLOC2 complex; dysbindin-Snapin-BLOS2 complex; BORC complex	8; 15; 11; 3; 8	3; 3; 3; 2; 8	23; 652; 654; 6416; 7545
1332	SNAPIN	-0.387269	-0.387269	0.0389487	0.0431691	-0.934587	-1.41231	98110	2	SNAPIN_1; SNAPIN_2	4	23557	O95295	632	23557	79036	Q9BQD3	SNAPIN	KXD1	2.40734e-14	0.000278613	0.999721	14	5	BLOC-1 (biogenesis of lysosome-related organelles complex 1); AP3-BLOC1 complex; BLOC1-BLOC2 complex; dysbindin-Snapin-BLOS2 complex; BORC complex	8; 15; 11; 3; 8	3; 3; 3; 2; 8	23; 652; 654; 6416; 7545
1333	SNAPIN	-0.387269	-0.387269	0.0389487	0.0431691	-0.934587	-1.41231	98110	2	SNAPIN_1; SNAPIN_2	4	23557	O95295	632	23557	10542	O43504	SNAPIN	LAMTOR5	1.26142e-06	0.0428456	0.957153	14	5	BLOC-1 (biogenesis of lysosome-related organelles complex 1); AP3-BLOC1 complex; BLOC1-BLOC2 complex; dysbindin-Snapin-BLOS2 complex; BORC complex	8; 15; 11; 3; 8	3; 3; 3; 2; 8	23; 652; 654; 6416; 7545
1334	SNAPIN	-0.387269	-0.387269	0.0389487	0.0431691	-0.934587	-1.41231	98110	2	SNAPIN_1; SNAPIN_2	4	23557	O95295	632	23557	55845	Q8WUW1	SNAPIN	BRK1	6.54263e-10	0.127171	0.872829	14	5	BLOC-1 (biogenesis of lysosome-related organelles complex 1); AP3-BLOC1 complex; BLOC1-BLOC2 complex; dysbindin-Snapin-BLOS2 complex; BORC complex	8; 15; 11; 3; 8	3; 3; 3; 2; 8	23; 652; 654; 6416; 7545
1335	SNAPIN	-0.387269	-0.387269	0.0389487	0.0431691	-0.934587	-1.41231	98110	2	SNAPIN_1; SNAPIN_2	4	23557	O95295	632	23557	60592	Q9UIL1	SNAPIN	SCOC	1.63412e-07	0.0544917	0.945508	14	5	BLOC-1 (biogenesis of lysosome-related organelles complex 1); AP3-BLOC1 complex; BLOC1-BLOC2 complex; dysbindin-Snapin-BLOS2 complex; BORC complex	8; 15; 11; 3; 8	3; 3; 3; 2; 8	23; 652; 654; 6416; 7545
1336	SNAPIN	-0.387269	-0.387269	0.0389487	0.0431691	-0.934587	-1.41231	98110	2	SNAPIN_1; SNAPIN_2	4	23557	O95295	632	23557	57511	Q9Y2V7	SNAPIN	COG6	1.12186e-07	0.219874	0.780126	14	5	BLOC-1 (biogenesis of lysosome-related organelles complex 1); AP3-BLOC1 complex; BLOC1-BLOC2 complex; dysbindin-Snapin-BLOS2 complex; BORC complex	8; 15; 11; 3; 8	3; 3; 3; 2; 8	23; 652; 654; 6416; 7545
1337	SNAPIN	-0.387269	-0.387269	0.0389487	0.0431691	-0.934587	-1.41231	98110	2	SNAPIN_1; SNAPIN_2	4	23557	O95295	632	23557	55763	Q9NV70	SNAPIN	EXOC1	2.38184e-11	0.01012	0.98988	14	5	BLOC-1 (biogenesis of lysosome-related organelles complex 1); AP3-BLOC1 complex; BLOC1-BLOC2 complex; dysbindin-Snapin-BLOS2 complex; BORC complex	8; 15; 11; 3; 8	3; 3; 3; 2; 8	23; 652; 654; 6416; 7545
1338	SNAPIN	-0.387269	-0.387269	0.0389487	0.0431691	-0.934587	-1.41231	98110	2	SNAPIN_1; SNAPIN_2	4	23557	O95295	632	23557	54785	Q96GS4	SNAPIN	C17orf59	7.47307e-13	4.5079e-05	0.999955	14	5	BLOC-1 (biogenesis of lysosome-related organelles complex 1); AP3-BLOC1 complex; BLOC1-BLOC2 complex; dysbindin-Snapin-BLOS2 complex; BORC complex	8; 15; 11; 3; 8	3; 3; 3; 2; 8	23; 652; 654; 6416; 7545
1339	GTF2H4	-0.387123	-0.387123	0.0397923	0.0438498	-0.93375	-1.41105	100235	2	GTF2H4_1; GTF2H4_2	4	2968	Q92759	633	2968	7094	Q9Y490	GTF2H4	TLN1	8.84039e-09	0.0900585	0.909941	3	6	RNA polymerase II holoenzyme complex; TFIIH transcription factor complex; TFIIH transcription factor complex; TFIIH transcription factor core complex; CF IIAm complex (Cleavage factor IIAm complex); BRCA1-RNA polymerase II complex	24; 19; 19; 5; 16; 26	4; 7; 7; 1; 1; 4	103; 107; 1029; 1037; 1141; 2825
1340	GTF2H4	-0.387123	-0.387123	0.0397923	0.0438498	-0.93375	-1.41105	100235	2	GTF2H4_1; GTF2H4_2	4	2968	Q92759	633	2968	404672	Q6ZYL4	GTF2H4	GTF2H5	7.38297e-18	8.00323e-17	1	3	6	RNA polymerase II holoenzyme complex; TFIIH transcription factor complex; TFIIH transcription factor complex; TFIIH transcription factor core complex; CF IIAm complex (Cleavage factor IIAm complex); BRCA1-RNA polymerase II complex	24; 19; 19; 5; 16; 26	4; 7; 7; 1; 1; 4	103; 107; 1029; 1037; 1141; 2825
1341	GTF2H4	-0.387123	-0.387123	0.0397923	0.0438498	-0.93375	-1.41105	100235	2	GTF2H4_1; GTF2H4_2	4	2968	Q92759	633	2968	4331	P51948	GTF2H4	MNAT1	6.71609e-06	0.00761681	0.992376	3	6	RNA polymerase II holoenzyme complex; TFIIH transcription factor complex; TFIIH transcription factor complex; TFIIH transcription factor core complex; CF IIAm complex (Cleavage factor IIAm complex); BRCA1-RNA polymerase II complex	24; 19; 19; 5; 16; 26	4; 7; 7; 1; 1; 4	103; 107; 1029; 1037; 1141; 2825
1342	C17orf59	-0.386445	-0.392358	0.00299502	0.00752433	-0.929844	-1.669	7738	4	C17orf59_2; C17orf59_3; C17orf59_1; C17orf59_4	4	54785	Q96GS4	634	54785	28956	Q9Y2Q5	C17orf59	LAMTOR2	1.76127e-13	0.000372801	0.999627	12	1	BORC complex	8	8	7545
1343	C17orf59	-0.386445	-0.392358	0.00299502	0.00752433	-0.929844	-1.669	7738	4	C17orf59_2; C17orf59_3; C17orf59_1; C17orf59_4	4	54785	Q96GS4	634	54785	282991	Q6QNY1	C17orf59	BLOC1S2	1.14619e-11	2.20782e-06	0.999998	12	1	BORC complex	8	8	7545
1344	C17orf59	-0.386445	-0.392358	0.00299502	0.00752433	-0.929844	-1.669	7738	4	C17orf59_2; C17orf59_3; C17orf59_1; C17orf59_4	4	54785	Q96GS4	634	54785	118426	Q969J3	C17orf59	LOH12CR1	1.2761e-14	1.49287e-06	0.999999	12	1	BORC complex	8	8	7545
1345	C17orf59	-0.386445	-0.392358	0.00299502	0.00752433	-0.929844	-1.669	7738	4	C17orf59_2; C17orf59_3; C17orf59_1; C17orf59_4	4	54785	Q96GS4	634	54785	23557	O95295	C17orf59	SNAPIN	7.47307e-13	4.5079e-05	0.999955	12	1	BORC complex	8	8	7545
1346	C17orf59	-0.386445	-0.392358	0.00299502	0.00752433	-0.929844	-1.669	7738	4	C17orf59_2; C17orf59_3; C17orf59_1; C17orf59_4	4	54785	Q96GS4	634	54785	55004	Q6IAA8	C17orf59	LAMTOR1	4.83794e-12	5.13938e-05	0.999949	12	1	BORC complex	8	8	7545
1347	C17orf59	-0.386445	-0.392358	0.00299502	0.00752433	-0.929844	-1.669	7738	4	C17orf59_2; C17orf59_3; C17orf59_1; C17orf59_4	4	54785	Q96GS4	634	54785	2647	P78537	C17orf59	BLOC1S1	1.54842e-23	1.82205e-16	1	12	1	BORC complex	8	8	7545
1348	C17orf59	-0.386445	-0.392358	0.00299502	0.00752433	-0.929844	-1.669	7738	4	C17orf59_2; C17orf59_3; C17orf59_1; C17orf59_4	4	54785	Q96GS4	634	54785	8649	Q9UHA4	C17orf59	LAMTOR3	1.52032e-14	4.84698e-08	1	12	1	BORC complex	8	8	7545
1349	C17orf59	-0.386445	-0.392358	0.00299502	0.00752433	-0.929844	-1.669	7738	4	C17orf59_2; C17orf59_3; C17orf59_1; C17orf59_4	4	54785	Q96GS4	634	54785	119032	Q96B45	C17orf59	C10orf32	8.37421e-20	6.05028e-16	1	12	1	BORC complex	8	8	7545
1350	C17orf59	-0.386445	-0.392358	0.00299502	0.00752433	-0.929844	-1.669	7738	4	C17orf59_2; C17orf59_3; C17orf59_1; C17orf59_4	4	54785	Q96GS4	634	54785	79036	Q9BQD3	C17orf59	KXD1	3.35745e-18	1.9892e-14	1	12	1	BORC complex	8	8	7545
1351	C17orf59	-0.386445	-0.392358	0.00299502	0.00752433	-0.929844	-1.669	7738	4	C17orf59_2; C17orf59_3; C17orf59_1; C17orf59_4	4	54785	Q96GS4	634	54785	389541	Q0VGL1	C17orf59	LAMTOR4	2.34204e-10	5.24855e-08	1	12	1	BORC complex	8	8	7545
1352	C17orf59	-0.386445	-0.392358	0.00299502	0.00752433	-0.929844	-1.669	7738	4	C17orf59_2; C17orf59_3; C17orf59_1; C17orf59_4	4	54785	Q96GS4	634	54785	729991	Q96FH0	C17orf59	MEF2BNB	6.40482e-20	4.32666e-13	1	12	1	BORC complex	8	8	7545
1353	C17orf59	-0.386445	-0.392358	0.00299502	0.00752433	-0.929844	-1.669	7738	4	C17orf59_2; C17orf59_3; C17orf59_1; C17orf59_4	4	54785	Q96GS4	634	54785	10542	O43504	C17orf59	LAMTOR5	6.58137e-24	4.3439e-05	0.999957	12	1	BORC complex	8	8	7545
1354	NKRF	-0.385898	-0.385898	0.0268446	0.0322495	-0.947392	-1.43166	67620	2	NKRF_4; NKRF_1	4	55922	O15226	637	55922	6223	P39019	NKRF	RPS19	3.25251e-14	0.0116587	0.988341	7
1355	NKRF	-0.385898	-0.385898	0.0268446	0.0322495	-0.947392	-1.43166	67620	2	NKRF_4; NKRF_1	4	55922	O15226	637	55922	9045	P50914	NKRF	RPL14	1.33633e-13	0.0266109	0.973389	7
1356	NKRF	-0.385898	-0.385898	0.0268446	0.0322495	-0.947392	-1.43166	67620	2	NKRF_4; NKRF_1	4	55922	O15226	637	55922	6426	Q07955	NKRF	SRSF1	8.45059e-12	0.0154134	0.984587	7
1357	NKRF	-0.385898	-0.385898	0.0268446	0.0322495	-0.947392	-1.43166	67620	2	NKRF_4; NKRF_1	4	55922	O15226	637	55922	3921	P08865	NKRF	RPSA	2.25699e-15	0.191607	0.808393	7
1358	NKRF	-0.385898	-0.385898	0.0268446	0.0322495	-0.947392	-1.43166	67620	2	NKRF_4; NKRF_1	4	55922	O15226	637	55922	11103	Q13601	NKRF	KRR1	8.58036e-10	0.0569389	0.943061	7
1359	NKRF	-0.385898	-0.385898	0.0268446	0.0322495	-0.947392	-1.43166	67620	2	NKRF_4; NKRF_1	4	55922	O15226	637	55922	9277	O15213	NKRF	WDR46	1.47546e-13	0.212248	0.787752	7
1360	NKRF	-0.385898	-0.385898	0.0268446	0.0322495	-0.947392	-1.43166	67620	2	NKRF_4; NKRF_1	4	55922	O15226	637	55922	23144	Q8IXZ2	NKRF	ZC3H3	7.64684e-13	0.111652	0.888348	7
1361	TIMM10	-0.382735	-0.389527	0.0127126	0.0196482	-0.927205	-1.5458	32390	3	TIMM10_4; TIMM10_2; TIMM10_1	4	26519	P62072	639	26519	10533	O95352	TIMM10	ATG7	1.12561e-09	0.0891869	0.910813	2	1	TIM (TIM9, TIM10) complex, mitochondrial	2	1	623
1362	TIMM10	-0.382735	-0.389527	0.0127126	0.0196482	-0.927205	-1.5458	32390	3	TIMM10_4; TIMM10_2; TIMM10_1	4	26519	P62072	639	26519	2671	P55789	TIMM10	GFER	2.21393e-07	0.168741	0.831259	2	1	TIM (TIM9, TIM10) complex, mitochondrial	2	1	623
1363	PPME1	-0.38211	-0.38211	0.0265568	0.0320652	-0.947718	-1.43216	66895	2	PPME1_2; PPME1_3	4	51400	Q9Y570	640	51400	5518	P30153	PPME1	PPP2R1A	8.41119e-24	0.0133383	0.986662	2	1	PPP2R1A-PPP2R1B-PPP2CA-PPME1-EIF4A1 complex	5	2	5876
1364	PPME1	-0.38211	-0.38211	0.0265568	0.0320652	-0.947718	-1.43216	66895	2	PPME1_2; PPME1_3	4	51400	Q9Y570	640	51400	55671	Q6IN85	PPME1	SMEK1	2.25084e-10	0.00182462	0.998175	2	1	PPP2R1A-PPP2R1B-PPP2CA-PPME1-EIF4A1 complex	5	2	5876
1365	ITPA	-0.381776	-0.381776	0.0322884	0.0369305	-0.941373	-1.42257	81333	2	ITPA_4; ITPA_1	4	3704	Q9BY32	641	3704	10542	O43504	ITPA	LAMTOR5	5.24323e-10	1.18657e-07	1	1
1366	TRNAU1AP	-0.379958	-0.442561	0.031733	0.036518	-0.894086	-1.49058	80853	3	TRNAU1AP_4; TRNAU1AP_1; TRNAU1AP_3	4	54952	Q9NX07	642	54952	55015	Q86UA1	TRNAU1AP	PRPF39	1.2224e-26	0.217942	0.782058	1
1367	ELP3	-0.379706	-0.384284	0.00548205	0.0113117	-0.947916	-1.58032	13967	3	ELP3_4; ELP3_3; ELP3_2	4	55140	Q9H9T3	643	55140	8518	O95163	ELP3	IKBKAP	1.42507e-13	3.51077e-05	0.999965	5	1	Elongator holo complex	4	4	1380
1368	ELP3	-0.379706	-0.384284	0.00548205	0.0113117	-0.947916	-1.58032	13967	3	ELP3_4; ELP3_3; ELP3_2	4	55140	Q9H9T3	643	55140	55250	Q6IA86	ELP3	ELP2	1.45764e-15	2.60215e-05	0.999974	5	1	Elongator holo complex	4	4	1380
1369	ELP3	-0.379706	-0.384284	0.00548205	0.0113117	-0.947916	-1.58032	13967	3	ELP3_4; ELP3_3; ELP3_2	4	55140	Q9H9T3	643	55140	26610	Q96EB1	ELP3	ELP4	7.04703e-12	5.86354e-06	0.999994	5	1	Elongator holo complex	4	4	1380
1370	ELP3	-0.379706	-0.384284	0.00548205	0.0113117	-0.947916	-1.58032	13967	3	ELP3_4; ELP3_3; ELP3_2	4	55140	Q9H9T3	643	55140	23587	Q8TE02	ELP3	ELP5	0.000108522	8.4837e-05	0.999807	5	1	Elongator holo complex	4	4	1380
1371	ELP3	-0.379706	-0.384284	0.00548205	0.0113117	-0.947916	-1.58032	13967	3	ELP3_4; ELP3_3; ELP3_2	4	55140	Q9H9T3	643	55140	112970	Q96EK9	ELP3	KTI12	3.72321e-05	4.85429e-10	0.999963	5	1	Elongator holo complex	4	4	1380
1372	GNL3L	-0.379273	-0.379273	0.0338268	0.0385668	-0.93974	-1.4201	85208	2	GNL3L_4; GNL3L_3	4	54552	Q9NVN8	644	54552	23071	Q9BS26	GNL3L	ERP44	3.01964e-29	0.041625	0.958375	1
1373	ATF3	-0.378991	-0.378991	0.0456498	0.0490034	-0.928157	-1.4026	114990	2	ATF3_3; ATF3_2	4	467	P18847	645	467	3726	P17275	ATF3	JUNB	2.96061e-09	2.02828e-08	1	1
1374	ARPC1B	-0.378441	-0.378441	0.0487983	0.0515076	-0.925232	-1.39818	122921	2	ARPC1B_3; ARPC1B_1	4	10095	O15143	647	10095	10109	O15144	ARPC1B	ARPC2	6.04111e-16	0.00185438	0.998146	6	1	Arp2/3 protein complex	7	7	27
1375	ARPC1B	-0.378441	-0.378441	0.0487983	0.0515076	-0.925232	-1.39818	122921	2	ARPC1B_3; ARPC1B_1	4	10095	O15143	647	10095	10092	O15511	ARPC1B	ARPC5	2.75856e-27	0.00601424	0.993986	6	1	Arp2/3 protein complex	7	7	27
1376	ARPC1B	-0.378441	-0.378441	0.0487983	0.0515076	-0.925232	-1.39818	122921	2	ARPC1B_3; ARPC1B_1	4	10095	O15143	647	10095	10097	P61160	ARPC1B	ACTR2	2.11809e-16	0.0101923	0.989808	6	1	Arp2/3 protein complex	7	7	27
1377	ARPC1B	-0.378441	-0.378441	0.0487983	0.0515076	-0.925232	-1.39818	122921	2	ARPC1B_3; ARPC1B_1	4	10095	O15143	647	10095	10094	O15145	ARPC1B	ARPC3	8.8969e-23	0.0659246	0.934075	6	1	Arp2/3 protein complex	7	7	27
1378	ARPC1B	-0.378441	-0.378441	0.0487983	0.0515076	-0.925232	-1.39818	122921	2	ARPC1B_3; ARPC1B_1	4	10095	O15143	647	10095	10096	P61158	ARPC1B	ACTR3	4.18805e-32	0.000505771	0.999494	6	1	Arp2/3 protein complex	7	7	27
1379	ARPC1B	-0.378441	-0.378441	0.0487983	0.0515076	-0.925232	-1.39818	122921	2	ARPC1B_3; ARPC1B_1	4	10095	O15143	647	10095	10093	P59998	ARPC1B	ARPC4	1.28794e-11	0.0542331	0.945767	6	1	Arp2/3 protein complex	7	7	27
1380	SCOC	-0.378123	-0.378123	0.0431631	0.0468964	-0.930485	-1.40611	108726	2	SCOC_4; SCOC_3	4	60592	Q9UIL1	648	60592	282991	Q6QNY1	SCOC	BLOC1S2	0.0399254	0.00746098	0.952614	2
1381	SCOC	-0.378123	-0.378123	0.0431631	0.0468964	-0.930485	-1.40611	108726	2	SCOC_4; SCOC_3	4	60592	Q9UIL1	648	60592	23557	O95295	SCOC	SNAPIN	1.63412e-07	0.0544917	0.945508	2
1382	BLM	-0.377264	-0.377264	0.0539658	0.0562373	-0.920576	-1.39114	135938	2	BLM_2; BLM_1	4	641	P54132	650	641	11103	Q13601	BLM	KRR1	0.000633612	0.185766	0.8136	1	12	BRAFT complex; BLM complex III; BRAFT complex; BASC complex (BRCA1-associated genome surveillance complex); BLM-TRF2 complex; BLM-TRF2 complex; BLM-TOP3A complex; MSH2/6-BLM-p53-RAD51 complex; BLM-RAD51L3-XRCC2 complex; BLM complex II; FA complex (Fanconi anemia complex); PTIP-DNA damage response complex	24; 4; 24; 12; 4; 4; 2; 5; 3; 6; 19; 6	2; 1; 2; 1; 2; 2; 1; 1; 1; 1; 1; 2	244; 246; 248; 433; 629; 1218; 2223; 2224; 2228; 2738; 2739; 5197
1383	RBM4	-0.376534	-0.376534	0.0319486	0.036659	-0.941728	-1.4231	80477	2	RBM4_2; RBM4_1	4	5936	Q9BWF3	651	5936	4931	O15381	RBM4	NVL	6.78503e-14	0.176999	0.823001	4
1384	RBM4	-0.376534	-0.376534	0.0319486	0.036659	-0.941728	-1.4231	80477	2	RBM4_2; RBM4_1	4	5936	Q9BWF3	651	5936	54881	Q9NXF1	RBM4	TEX10	8.71331e-11	0.167526	0.832474	4
1385	RBM4	-0.376534	-0.376534	0.0319486	0.036659	-0.941728	-1.4231	80477	2	RBM4_2; RBM4_1	4	5936	Q9BWF3	651	5936	134430	Q8NI36	RBM4	WDR36	1.18208e-07	0.0142326	0.985767	4
1386	RBM4	-0.376534	-0.376534	0.0319486	0.036659	-0.941728	-1.4231	80477	2	RBM4_2; RBM4_1	4	5936	Q9BWF3	651	5936	5822	Q15269	RBM4	PWP2	0.00186859	0.0772454	0.920886	4
1387	IKBKAP	-0.36791	-0.36791	0.0474112	0.0504405	-0.926524	-1.40013	119427	2	IKBKAP_3; IKBKAP_2	4	8518	O95163	658	8518	55140	Q9H9T3	IKBKAP	ELP3	1.42507e-13	3.51077e-05	0.999965	1	1	Elongator holo complex	4	4	1380
1388	IPO9	-0.367675	-0.367675	0.0360173	0.0404608	-0.937512	-1.41673	90726	2	IPO9_1; IPO9_2	4	55705	Q96P70	660	55705	7095	Q99442	IPO9	SEC62	2.73905e-14	0.172638	0.827362	1
1389	LYN	-0.366784	-0.344429	0.0101591	0.0169221	-0.933578	-1.55642	25884	3	LYN_1; LYN_3; LYN_2	4	4067	P07948	662	4067	29956	Q96G23	LYN	CERS2	6.01827e-10	0.0402188	0.959781	1	5	PLC-gamma-2-SLP-76-Lyn-Grb2 complex; FGFR2-c-Cbl-Lyn-Fyn complex; p21(ras)GAP-Fyn-Lyn-Yes complex, thrombin stimulated; CD20-LCK-LYN-FYN-p75/80 complex, (Raji human B cell line); PLC-gamma-2-Lyn-FcR-gamma complex	4; 4; 4; 4; 3	2; 1; 1; 1; 1	2536; 2563; 2564; 2565; 2910
1390	KRI1	-0.366562	-0.366562	0.0457268	0.0490126	-0.928086	-1.40249	115184	2	KRI1_4; KRI1_3	4	65095	Q8N9T8	663	65095	1616	Q9UER7	KRI1	DAXX	1.11605e-12	0.174143	0.825857	9
1391	KRI1	-0.366562	-0.366562	0.0457268	0.0490126	-0.928086	-1.40249	115184	2	KRI1_4; KRI1_3	4	65095	Q8N9T8	663	65095	6223	P39019	KRI1	RPS19	6.00157e-11	0.02711	0.97289	9
1392	KRI1	-0.366562	-0.366562	0.0457268	0.0490126	-0.928086	-1.40249	115184	2	KRI1_4; KRI1_3	4	65095	Q8N9T8	663	65095	6208	P62263	KRI1	RPS14	2.29385e-11	0.0226286	0.977371	9
1393	KRI1	-0.366562	-0.366562	0.0457268	0.0490126	-0.928086	-1.40249	115184	2	KRI1_4; KRI1_3	4	65095	Q8N9T8	663	65095	6426	Q07955	KRI1	SRSF1	3.01708e-12	0.013757	0.986243	9
1394	KRI1	-0.366562	-0.366562	0.0457268	0.0490126	-0.928086	-1.40249	115184	2	KRI1_4; KRI1_3	4	65095	Q8N9T8	663	65095	84294	Q9BRU9	KRI1	UTP23	8.31976e-11	0.00253443	0.997466	9
1395	KRI1	-0.366562	-0.366562	0.0457268	0.0490126	-0.928086	-1.40249	115184	2	KRI1_4; KRI1_3	4	65095	Q8N9T8	663	65095	3921	P08865	KRI1	RPSA	1.97881e-10	0.162964	0.837036	9
1396	KRI1	-0.366562	-0.366562	0.0457268	0.0490126	-0.928086	-1.40249	115184	2	KRI1_4; KRI1_3	4	65095	Q8N9T8	663	65095	11103	Q13601	KRI1	KRR1	9.7789e-12	0.000416378	0.999584	9
[truncated: 55 more rows]
